# Supplementary material for: Integrated Methylome and Transcriptome Analysis between the CMS-D2 Line ZBA and Its Maintainer Line ZB in Upland Cotton
Source: Int J Mol Sci. 2019 Dec 2;20(23):6070. doi: 10.3390/ijms20236070 (PMC6928835; doi:10.3390/ijms20236070)
Supplement: Supplementary file 1 [file ijms-20-06070-s001.zip]

Archive with 6 entries (6 files):
- Figures. S1-S8.pdf
- Table S1. Output data description of WGBS for ZB and ZBA.xlsx
- Table S2. GO enrichment analysis of hyper- or hypomethylated DEGs in ZB versus ZBA.xlsx
- Table S3. KEGG pathway enrichment analysis of hyper- or hypomethylated DEGs in ZB versus ZBA.xlsx
- Table S4. Information on 13 DMEGs in the oxidative phosphorylation signaling pathway involved in anther development.xlsx
- Table S5. Primers used for qRT-PCR in this study.xlsx
