# Supplementary material for: Integrated Methylome and Transcriptome Analysis between the CMS-D2 Line ZBA and Its Maintainer Line ZB in Upland Cotton
Source: Int J Mol Sci. 2019 Dec 2;20(23):6070. doi: 10.3390/ijms20236070 (PMC6928835; doi:10.3390/ijms20236070)
Supplement: Supplementary file 1 [file ijms-20-06070-s001.zip › Table S1. Output data description of WGBS for ZB and ZBA.xlsx]

## Sheet: Output data description
Table S1. Output data description of WGBS for ZB and ZBA
Samples	Raw	Raw	Clean	Clean	Clean	Q20	Q30	GC	BS Conversion	Mapped	Mapping	Duplication
	Reads	Bases (Gb)	Reads	Bases (Gb)	Ratio (%)	(%)	(%)	Content (%)	Rate (%)	Reads	Rate (%)	Rate (%)
ZB	313503324	78.38	309694292	76.12	97.12	98.51	95.44	22.5	99.902	230567400	74.45	13.19
ZBA	306385019	76.6	301003201	72.93	95.21	98.26	94.68	20.31	99.841	239026641	79.41	11.19
Mapping rate is the proportion of clean sequencing reads that have a unique position on the reference genome after alignment. Duplication rate is the percentage of repetitive sequences in all clean sequencing reads.
