# Supplementary material for: Integrated Methylome and Transcriptome Analysis between the CMS-D2 Line ZBA and Its Maintainer Line ZB in Upland Cotton
Source: Int J Mol Sci. 2019 Dec 2;20(23):6070. doi: 10.3390/ijms20236070 (PMC6928835; doi:10.3390/ijms20236070)
Supplement: Supplementary file 1 [file ijms-20-06070-s001.zip › Table S2. GO enrichment analysis of hyper- or hypomethylated DEGs in ZB versus ZBA.xlsx]

## Sheet: Hyper
GO_accession	Description	Term_type	Over_represented_pValue	Corrected_pValue	DMR_item	DMR_list	Bg_item	Bg_list	DMR genes
GO:0016984	ribulose-bisphosphate carboxylase activity	molecular_function	3.8744e-07	0.00040819	4	202	15	48611	Gh_Sca011694G01,Gh_D07G1807,Gh_A01G2111,Gh_Sca006756G06
GO:0009161	ribonucleoside monophosphate metabolic process	biological_process	4.2488e-07	0.00040819	18	202	1035	48611	Gh_A09G0362,Gh_Sca010487G03,Gh_D13G1464,Gh_A05G0978,Gh_D10G2202,Gh_A05G3831,Gh_A11G0922,Gh_A03G0725,Gh_A08G0871,Gh_D04G1994,Gh_D12G2404,Gh_A11G3033,Gh_D02G1538,Gh_A06G0349,Gh_Sca010487G02,Gh_D13G2339,Gh_D11G0730,Gh_A01G0843
GO:0009116	nucleoside metabolic process	biological_process	4.7468e-07	0.00040819	19	202	1157	48611	Gh_D13G1464,Gh_Sca010487G03,Gh_A09G0362,Gh_D04G1994,Gh_A08G0871,Gh_A03G0725,Gh_A05G0978,Gh_A11G0922,Gh_D10G2202,Gh_A05G3831,Gh_D02G1538,Gh_D12G2404,Gh_A11G3033,Gh_D11G0730,Gh_A01G0843,Gh_A07G0166,Gh_Sca010487G02,Gh_A06G0349,Gh_D13G2339
GO:1901657	glycosyl compound metabolic process	biological_process	4.8709e-07	0.00040819	19	202	1159	48611	Gh_D02G1538,Gh_D12G2404,Gh_A11G3033,Gh_D11G0730,Gh_A01G0843,Gh_A07G0166,Gh_D13G2339,Gh_Sca010487G02,Gh_A06G0349,Gh_Sca010487G03,Gh_D13G1464,Gh_A09G0362,Gh_A03G0725,Gh_A08G0871,Gh_D04G1994,Gh_A05G0978,Gh_A05G3831,Gh_D10G2202,Gh_A11G0922
GO:0009123	nucleoside monophosphate metabolic process	biological_process	5.5914e-07	0.00040819	18	202	1055	48611	Gh_Sca010487G02,Gh_D13G2339,Gh_A06G0349,Gh_A01G0843,Gh_D11G0730,Gh_A11G3033,Gh_D12G2404,Gh_D02G1538,Gh_D10G2202,Gh_A11G0922,Gh_A05G3831,Gh_A05G0978,Gh_A03G0725,Gh_A08G0871,Gh_D04G1994,Gh_A09G0362,Gh_Sca010487G03,Gh_D13G1464
GO:0046034	ATP metabolic process	biological_process	6.8466e-07	0.00040819	17	202	958	48611	Gh_D13G1464,Gh_Sca010487G03,Gh_A09G0362,Gh_D04G1994,Gh_A08G0871,Gh_A03G0725,Gh_A05G3831,Gh_A11G0922,Gh_A05G0978,Gh_D02G1538,Gh_A11G3033,Gh_D12G2404,Gh_A01G0843,Gh_D11G0730,Gh_D13G2339,Gh_Sca010487G02,Gh_A06G0349
GO:0009144	purine nucleoside triphosphate metabolic process	biological_process	8.2277e-07	0.00040819	17	202	971	48611	Gh_D12G2404,Gh_A11G3033,Gh_D02G1538,Gh_D13G2339,Gh_Sca010487G02,Gh_A06G0349,Gh_D11G0730,Gh_A01G0843,Gh_A09G0362,Gh_Sca010487G03,Gh_D13G1464,Gh_A05G0978,Gh_A11G0922,Gh_A05G3831,Gh_A03G0725,Gh_D04G1994,Gh_A08G0871
GO:0009199	ribonucleoside triphosphate metabolic process	biological_process	8.2277e-07	0.00040819	17	202	971	48611	Gh_Sca010487G03,Gh_D13G1464,Gh_A09G0362,Gh_A03G0725,Gh_A08G0871,Gh_D04G1994,Gh_A05G3831,Gh_A11G0922,Gh_A05G0978,Gh_D02G1538,Gh_A11G3033,Gh_D12G2404,Gh_A01G0843,Gh_D11G0730,Gh_D13G2339,Gh_Sca010487G02,Gh_A06G0349
GO:0009205	purine ribonucleoside triphosphate metabolic process	biological_process	8.2277e-07	0.00040819	17	202	971	48611	Gh_A05G0978,Gh_A05G3831,Gh_A11G0922,Gh_A08G0871,Gh_D04G1994,Gh_A03G0725,Gh_A09G0362,Gh_D13G1464,Gh_Sca010487G03,Gh_D13G2339,Gh_Sca010487G02,Gh_A06G0349,Gh_D11G0730,Gh_A01G0843,Gh_D12G2404,Gh_A11G3033,Gh_D02G1538
GO:0009141	nucleoside triphosphate metabolic process	biological_process	9.1986e-07	0.00041072	17	202	979	48611	Gh_D02G1538,Gh_A11G3033,Gh_D12G2404,Gh_A01G0843,Gh_D11G0730,Gh_A06G0349,Gh_D13G2339,Gh_Sca010487G02,Gh_D13G1464,Gh_Sca010487G03,Gh_A09G0362,Gh_D04G1994,Gh_A08G0871,Gh_A03G0725,Gh_A11G0922,Gh_A05G3831,Gh_A05G0978
GO:0009119	ribonucleoside metabolic process	biological_process	1.151e-06	0.00046719	18	202	1110	48611	Gh_A09G0362,Gh_D13G1464,Gh_Sca010487G03,Gh_D10G2202,Gh_A05G3831,Gh_A11G0922,Gh_A05G0978,Gh_D04G1994,Gh_A08G0871,Gh_A03G0725,Gh_A11G3033,Gh_D12G2404,Gh_D02G1538,Gh_D13G2339,Gh_Sca010487G02,Gh_A06G0349,Gh_A01G0843,Gh_D11G0730
GO:0009126	purine nucleoside monophosphate metabolic process	biological_process	1.3651e-06	0.00046887	17	202	1008	48611	Gh_D13G1464,Gh_Sca010487G03,Gh_A09G0362,Gh_A08G0871,Gh_D04G1994,Gh_A03G0725,Gh_A05G0978,Gh_A11G0922,Gh_A05G3831,Gh_D02G1538,Gh_D12G2404,Gh_A11G3033,Gh_D11G0730,Gh_A01G0843,Gh_Sca010487G02,Gh_A06G0349,Gh_D13G2339
GO:0009167	purine ribonucleoside monophosphate metabolic process	biological_process	1.3651e-06	0.00046887	17	202	1008	48611	Gh_D13G2339,Gh_A06G0349,Gh_Sca010487G02,Gh_D11G0730,Gh_A01G0843,Gh_D12G2404,Gh_A11G3033,Gh_D02G1538,Gh_A05G0978,Gh_A05G3831,Gh_A11G0922,Gh_A03G0725,Gh_A08G0871,Gh_D04G1994,Gh_A09G0362,Gh_Sca010487G03,Gh_D13G1464
GO:0019693	ribose phosphate metabolic process	biological_process	1.5946e-06	0.00050441	19	202	1256	48611	Gh_A01G0843,Gh_D11G0730,Gh_Sca010487G02,Gh_A06G0349,Gh_D13G2339,Gh_D02G1538,Gh_A11G3033,Gh_D12G2404,Gh_A03G0725,Gh_A08G0871,Gh_D04G1994,Gh_A07G1603,Gh_D10G2202,Gh_A11G0922,Gh_A05G3831,Gh_A05G0978,Gh_Sca010487G03,Gh_D13G1464,Gh_A09G0362
GO:0009259	ribonucleotide metabolic process	biological_process	1.6945e-06	0.00050441	18	202	1141	48611	Gh_A03G0725,Gh_A08G0871,Gh_D04G1994,Gh_D10G2202,Gh_A11G0922,Gh_A05G3831,Gh_A05G0978,Gh_Sca010487G03,Gh_D13G1464,Gh_A09G0362,Gh_A01G0843,Gh_D11G0730,Gh_A06G0349,Gh_Sca010487G02,Gh_D13G2339,Gh_D02G1538,Gh_A11G3033,Gh_D12G2404
GO:0042278	purine nucleoside metabolic process	biological_process	2.9919e-06	0.00078581	17	202	1069	48611	Gh_Sca010487G02,Gh_A06G0349,Gh_D13G2339,Gh_A01G0843,Gh_D11G0730,Gh_A11G3033,Gh_D12G2404,Gh_D02G1538,Gh_A11G0922,Gh_A05G3831,Gh_A05G0978,Gh_D04G1994,Gh_A08G0871,Gh_A03G0725,Gh_A09G0362,Gh_D13G1464,Gh_Sca010487G03
GO:0046128	purine ribonucleoside metabolic process	biological_process	2.9919e-06	0.00078581	17	202	1069	48611	Gh_D02G1538,Gh_D12G2404,Gh_A11G3033,Gh_D11G0730,Gh_A01G0843,Gh_A06G0349,Gh_D13G2339,Gh_Sca010487G02,Gh_D13G1464,Gh_Sca010487G03,Gh_A09G0362,Gh_D04G1994,Gh_A08G0871,Gh_A03G0725,Gh_A05G0978,Gh_A05G3831,Gh_A11G0922
GO:0009150	purine ribonucleotide metabolic process	biological_process	5.1464e-06	0.0012766	17	202	1114	48611	Gh_A11G3033,Gh_D12G2404,Gh_D02G1538,Gh_A06G0349,Gh_D13G2339,Gh_Sca010487G02,Gh_A01G0843,Gh_D11G0730,Gh_A09G0362,Gh_D13G1464,Gh_Sca010487G03,Gh_A11G0922,Gh_A05G3831,Gh_A05G0978,Gh_D04G1994,Gh_A08G0871,Gh_A03G0725
GO:0009522	photosystem I	cellular_component	5.6231e-06	0.0013214	7	202	161	48611	Gh_A11G0922,Gh_Sca007622G03,Gh_Sca006756G05,Gh_Sca007035G04,Gh_Sca005362G03,Gh_D08G0270,Gh_Sca006711G02
GO:0006163	purine nucleotide metabolic process	biological_process	6.1271e-06	0.0013679	17	202	1129	48611	Gh_A03G0725,Gh_A08G0871,Gh_D04G1994,Gh_A05G3831,Gh_A11G0922,Gh_A05G0978,Gh_Sca010487G03,Gh_D13G1464,Gh_A09G0362,Gh_A01G0843,Gh_D11G0730,Gh_D13G2339,Gh_A06G0349,Gh_Sca010487G02,Gh_D02G1538,Gh_A11G3033,Gh_D12G2404
GO:0009117	nucleotide metabolic process	biological_process	6.9496e-06	0.0014776	19	202	1392	48611	Gh_A11G0922,Gh_D10G2202,Gh_A05G3831,Gh_A05G0978,Gh_A03G0725,Gh_D04G1994,Gh_A08G0871,Gh_A07G1603,Gh_A09G0362,Gh_Sca010487G03,Gh_D13G1464,Gh_D13G2339,Gh_Sca010487G02,Gh_A06G0349,Gh_A01G0843,Gh_D11G0730,Gh_A11G3033,Gh_D12G2404,Gh_D02G1538
GO:0055086	nucleobase-containing small molecule metabolic process	biological_process	7.7205e-06	0.0015669	20	202	1534	48611	Gh_A07G0166,Gh_A01G0843,Gh_D11G0730,Gh_Sca010487G02,Gh_A06G0349,Gh_D13G2339,Gh_D02G1538,Gh_A11G3033,Gh_D12G2404,Gh_A03G0725,Gh_D04G1994,Gh_A08G0871,Gh_A07G1603,Gh_D10G2202,Gh_A05G3831,Gh_A11G0922,Gh_A05G0978,Gh_Sca010487G03,Gh_D13G1464,Gh_A09G0362
GO:0072521	purine-containing compound metabolic process	biological_process	8.3234e-06	0.0016158	17	202	1156	48611	Gh_A11G3033,Gh_D12G2404,Gh_D02G1538,Gh_Sca010487G02,Gh_D13G2339,Gh_A06G0349,Gh_A01G0843,Gh_D11G0730,Gh_A09G0362,Gh_D13G1464,Gh_Sca010487G03,Gh_A05G3831,Gh_A11G0922,Gh_A05G0978,Gh_D04G1994,Gh_A08G0871,Gh_A03G0725
GO:0006753	nucleoside phosphate metabolic process	biological_process	8.744e-06	0.0016268	19	202	1415	48611	Gh_A05G3831,Gh_D10G2202,Gh_A11G0922,Gh_A05G0978,Gh_A03G0725,Gh_A08G0871,Gh_D04G1994,Gh_A07G1603,Gh_A09G0362,Gh_Sca010487G03,Gh_D13G1464,Gh_Sca010487G02,Gh_D13G2339,Gh_A06G0349,Gh_A01G0843,Gh_D11G0730,Gh_A11G3033,Gh_D12G2404,Gh_D02G1538
GO:0005740	mitochondrial envelope	cellular_component	1.5347e-05	0.0027409	15	202	966	48611	Gh_D12G2711,Gh_D02G1538,Gh_D04G0469,Gh_A05G0716,Gh_A11G3033,Gh_D13G0686,Gh_D12G2404,Gh_A01G0843,Gh_A11G2238,Gh_D11G0730,Gh_A11G2358,Gh_A05G3831,Gh_D13G2339,Gh_A06G0349,Gh_A12G0777
GO:0098796	membrane protein complex	cellular_component	1.6159e-05	0.0027751	27	202	2638	48611	Gh_Sca006711G02,Gh_Sca007035G04,Gh_Sca006756G05,Gh_D04G0469,Gh_D08G1218,Gh_A03G0725,Gh_D08G0270,Gh_A05G0978,Gh_Sca005362G03,Gh_Sca007622G03,Gh_Sca007622G02,Gh_A05G3831,Gh_A11G0922,Gh_D06G0894,Gh_D02G1538,Gh_A07G1608,Gh_D12G2404,Gh_A11G3033,Gh_Sca005362G04,Gh_D11G0730,Gh_A11G2358,Gh_A01G0843,Gh_A12G0777,Gh_D04G0317,Gh_Sca010487G02,Gh_D13G2339,Gh_A06G0349
GO:0015977	carbon fixation	biological_process	1.7445e-05	0.0028849	4	202	37	48611	Gh_Sca006756G06,Gh_A01G2111,Gh_D07G1807,Gh_Sca011694G01
GO:0044429	mitochondrial part	cellular_component	2.3402e-05	0.0037318	15	202	1002	48611	Gh_D02G1538,Gh_D12G2711,Gh_D12G2404,Gh_D13G0686,Gh_A11G3033,Gh_A05G0716,Gh_D04G0469,Gh_A11G2358,Gh_D11G0730,Gh_A11G2238,Gh_A01G0843,Gh_A12G0777,Gh_A06G0349,Gh_D13G2339,Gh_A05G3831
GO:0031966	mitochondrial membrane	cellular_component	3.2779e-05	0.0050469	14	202	910	48611	Gh_A06G0349,Gh_D13G2339,Gh_A05G3831,Gh_A12G0777,Gh_A01G0843,Gh_A11G2358,Gh_D11G0730,Gh_A11G3033,Gh_A05G0716,Gh_D04G0469,Gh_D12G2404,Gh_D13G0686,Gh_D12G2711,Gh_D02G1538
GO:0009521	photosystem	cellular_component	4.2868e-05	0.0063801	12	202	699	48611	Gh_A11G0922,Gh_Sca007622G02,Gh_Sca007622G03,Gh_Sca005362G03,Gh_D08G0270,Gh_A12G0777,Gh_D08G1218,Gh_Sca005362G04,Gh_Sca006756G05,Gh_Sca007035G04,Gh_Sca006711G02,Gh_D06G0894
GO:0031967	organelle envelope	cellular_component	4.4729e-05	0.0064425	16	202	1189	48611	Gh_D05G0705,Gh_A05G0716,Gh_D04G0469,Gh_A05G3831,Gh_D13G0686,Gh_D12G2404,Gh_A11G3033,Gh_D02G1538,Gh_D12G2711,Gh_A12G0777,Gh_D13G2339,Gh_A06G0349,Gh_D11G0730,Gh_A11G2358,Gh_A11G2238,Gh_A01G0843
GO:1901135	carbohydrate derivative metabolic process	biological_process	4.945e-05	0.0068999	25	202	2499	48611	Gh_D12G2404,Gh_A11G3033,Gh_D02G1538,Gh_Sca010487G02,Gh_A06G0349,Gh_D13G2339,Gh_A09G2323,Gh_D11G0730,Gh_A11G2358,Gh_A01G0843,Gh_A07G0166,Gh_A09G0362,Gh_Sca010487G03,Gh_D13G1464,Gh_D10G0130,Gh_A05G0978,Gh_A11G0922,Gh_D10G2202,Gh_D02G0503,Gh_A05G3831,Gh_D05G2242,Gh_A07G1603,Gh_A03G0725,Gh_D04G1994,Gh_A08G0871
GO:0055114	oxidation-reduction process	biological_process	6.5577e-05	0.0088728	42	202	5459	48611	Gh_A01G2111,Gh_D13G2339,Gh_A01G0311,Gh_A09G0411,Gh_A11G2358,Gh_Sca005362G04,Gh_D02G1418,Gh_D09G0593,Gh_A10G0789,Gh_D12G1932,Gh_D06G0894,Gh_D10G2202,Gh_A08G1668,Gh_D10G1008,Gh_Sca005646G04,Gh_A07G1603,Gh_D04G0469,Gh_D10G1880,Gh_A09G2247,Gh_D06G0041,Gh_A05G2246,Gh_D07G1209,Gh_D13G1464,Gh_Sca006566G05,Gh_A11G3033,Gh_D13G0686,Gh_D06G1339,Gh_A03G0734,Gh_D12G1468,Gh_Sca005787G06,Gh_D02G1538,Gh_A11G0922…
GO:0019866	organelle inner membrane	cellular_component	7.0881e-05	0.0093083	12	202	737	48611	Gh_A12G0777,Gh_A06G0349,Gh_D13G2339,Gh_A05G3831,Gh_D11G0730,Gh_A01G0843,Gh_D13G0686,Gh_D12G2404,Gh_D05G0705,Gh_A11G3033,Gh_D04G0469,Gh_D02G1538
GO:0034357	photosynthetic membrane	cellular_component	8.251e-05	0.010526	12	202	749	48611	Gh_D08G1218,Gh_Sca007622G02,Gh_A11G0922,Gh_Sca007622G03,Gh_Sca005362G03,Gh_D08G0270,Gh_A12G0777,Gh_Sca006711G02,Gh_D06G0894,Gh_Sca005362G04,Gh_Sca006756G05,Gh_Sca007035G04
GO:0031975	envelope	cellular_component	8.8698e-05	0.011001	16	202	1261	48611	Gh_A11G2358,Gh_A11G2238,Gh_D11G0730,Gh_A01G0843,Gh_A12G0777,Gh_A06G0349,Gh_D13G2339,Gh_D02G1538,Gh_D12G2711,Gh_D12G2404,Gh_D13G0686,Gh_A11G3033,Gh_A05G3831,Gh_D04G0469,Gh_A05G0716,Gh_D05G0705
GO:0015979	photosynthesis	biological_process	0.00010137	0.012146	15	202	1142	48611	Gh_Sca007035G04,Gh_A08G1015,Gh_Sca006756G05,Gh_Sca005362G04,Gh_Sca005787G06,Gh_D06G0894,Gh_Sca006711G02,Gh_Sca005362G03,Gh_A12G0777,Gh_D08G0270,Gh_Sca007622G02,Gh_A11G0922,Gh_Sca007622G03,Gh_D13G2339,Gh_D08G1218
GO:0045182	translation regulator activity	molecular_function	0.00010337	0.012146	2	202	4	48611	Gh_A09G0281,Gh_D10G2202
GO:0005739	mitochondrion	cellular_component	0.00011799	0.013509	15	202	1158	48611	Gh_A05G0716,Gh_A11G3033,Gh_D04G0469,Gh_D13G0686,Gh_D12G2404,Gh_D12G2711,Gh_D02G1538,Gh_A06G0349,Gh_D13G2339,Gh_A05G3831,Gh_A12G0777,Gh_A01G0843,Gh_A11G2238,Gh_D11G0730,Gh_A11G2358
GO:0005743	mitochondrial inner membrane	cellular_component	0.00020228	0.02258	11	202	704	48611	Gh_D11G0730,Gh_A01G0843,Gh_A12G0777,Gh_D13G2339,Gh_A06G0349,Gh_A05G3831,Gh_D02G1538,Gh_D12G2404,Gh_D13G0686,Gh_A11G3033,Gh_D04G0469
GO:0009579	thylakoid	cellular_component	0.00025598	0.027213	12	202	847	48611	Gh_A12G0777,Gh_D08G0270,Gh_Sca005362G03,Gh_Sca007622G03,Gh_A11G0922,Gh_Sca007622G02,Gh_D08G1218,Gh_Sca007035G04,Gh_Sca006756G05,Gh_Sca005362G04,Gh_D06G0894,Gh_Sca006711G02
GO:0044436	thylakoid part	cellular_component	0.00025598	0.027213	12	202	847	48611	Gh_Sca006756G05,Gh_Sca007035G04,Gh_Sca005362G04,Gh_D06G0894,Gh_Sca006711G02,Gh_Sca005362G03,Gh_D08G0270,Gh_A12G0777,Gh_Sca007622G02,Gh_A11G0922,Gh_Sca007622G03,Gh_D08G1218
GO:0005186	pheromone activity	molecular_function	0.00028368	0.029456	4	202	75	48611	Gh_D12G1363,Gh_D10G2202,Gh_A05G2494,Gh_A11G2358
GO:0019637	organophosphate metabolic process	biological_process	0.00030877	0.031334	20	202	2008	48611	Gh_A01G0843,Gh_D11G0730,Gh_A11G2358,Gh_Sca010487G02,Gh_A06G0349,Gh_D13G2339,Gh_D02G1538,Gh_A11G3033,Gh_D12G2404,Gh_D04G1994,Gh_A08G0871,Gh_A03G0725,Gh_A07G1603,Gh_D10G2202,Gh_A05G3831,Gh_A11G0922,Gh_A05G0978,Gh_D13G1464,Gh_Sca010487G03,Gh_A09G0362
GO:0015074	DNA integration	biological_process	0.0003939	0.039084	15	202	1297	48611	Gh_A11G2358,Gh_D02G1685,Gh_D08G0270,Gh_A12G0777,Gh_A11G0922,Gh_D10G2202,Gh_D12G1363,Gh_D12G1468,Gh_A05G2494,Gh_A10G0578,Gh_A08G1584,Gh_D09G0593,Gh_D05G1158,Gh_D13G0686,Gh_D06G0902
GO:0009966	regulation of signal transduction	biological_process	0.00052084	0.050179	6	202	238	48611	Gh_D06G1866,Gh_D09G0593,Gh_D08G0270,Gh_D10G2261,Gh_D10G2202,Gh_D05G2734
GO:0044455	mitochondrial membrane part	cellular_component	0.00052821	0.050179	10	202	665	48611	Gh_D12G2404,Gh_D04G0469,Gh_A11G3033,Gh_D02G1538,Gh_A12G0777,Gh_A05G3831,Gh_A06G0349,Gh_D13G2339,Gh_D11G0730,Gh_A01G0843
GO:0016651	oxidoreductase activity, acting on NAD(P)H	molecular_function	0.0005595	0.050756	10	202	670	48611	Gh_D13G0686,Gh_A03G0734,Gh_A10G0789,Gh_D06G0894,Gh_D12G1932,Gh_D13G1464,Gh_D10G2202,Gh_A01G2111,Gh_Sca006566G05,Gh_Sca005646G04
GO:0010646	regulation of cell communication	biological_process	0.00056838	0.050756	6	202	242	48611	Gh_D05G2734,Gh_D10G2202,Gh_D10G2261,Gh_D08G0270,Gh_D09G0593,Gh_D06G1866
GO:0098800	inner mitochondrial membrane protein complex	cellular_component	0.00062579	0.054787	9	202	560	48611	Gh_D04G0469,Gh_A11G3033,Gh_D12G2404,Gh_D02G1538,Gh_A05G3831,Gh_A06G0349,Gh_D13G2339,Gh_A01G0843,Gh_D11G0730
GO:0023051	regulation of signaling	biological_process	0.00067353	0.056462	6	202	250	48611	Gh_D10G2261,Gh_D10G2202,Gh_D05G2734,Gh_D08G0270,Gh_D06G1866,Gh_D09G0593
GO:0006818	hydrogen transport	biological_process	0.00068285	0.056462	13	202	1083	48611	Gh_Sca010487G03,Gh_D12G2404,Gh_A11G3033,Gh_A11G2358,Gh_D11G0730,Gh_A03G0725,Gh_A01G0843,Gh_D04G1994,Gh_A05G0978,Gh_A05G3831,Gh_A11G0922,Gh_Sca010487G02,Gh_A06G0349
GO:0015992	proton transport	biological_process	0.00068285	0.056462	13	202	1083	48611	Gh_A11G0922,Gh_A05G3831,Gh_Sca010487G02,Gh_A06G0349,Gh_A05G0978,Gh_A03G0725,Gh_A01G0843,Gh_D04G1994,Gh_D11G0730,Gh_A11G2358,Gh_A11G3033,Gh_D12G2404,Gh_Sca010487G03
GO:0009987	cellular process	biological_process	0.00073903	0.059996	137	202	27408	48611	Gh_A07G0876,Gh_D02G1538,Gh_A08G0319,Gh_A06G0222,Gh_A07G0166,Gh_D08G0417,Gh_D09G1825,Gh_D07G0576,Gh_A12G0777,Gh_D10G1453,Gh_D02G1620,Gh_D04G1994,Gh_Sca007622G03,Gh_D02G0503,Gh_D08G0567,Gh_D05G1075,Gh_Sca005362G03,Gh_D06G0894,Gh_A07G1240,Gh_D04G0576,Gh_Sca005362G04,Gh_D03G1781,Gh_A12G1973,Gh_D01G0370,Gh_A09G2323,Gh_D13G2339,Gh_A11G2663,Gh_A08G1584,Gh_A10G0578,Gh_D06G0041,Gh_A03G0725,Gh_A01G1126,Gh_…
GO:0044425	membrane part	cellular_component	0.00077984	0.062179	55	202	8721	48611	Gh_A05G2494,Gh_Sca004751G01,Gh_D07G1209,Gh_D05G0815,Gh_Sca006711G02,Gh_Sca007035G04,Gh_D04G0469,Gh_A05G0716,Gh_A03G0725,Gh_Sca007622G02,Gh_D10G2202,Gh_A05G3831,Gh_A08G1668,Gh_D04G0583,Gh_D12G1932,Gh_D06G0894,Gh_A07G1608,Gh_D09G0593,Gh_D02G1649,Gh_A04G1404,Gh_Sca005362G04,Gh_A01G1191,Gh_A11G2358,Gh_D11G0730,Gh_D06G1345,Gh_D13G1348,Gh_A01G0843,Gh_A12G0331,Gh_Sca010487G02,Gh_D13G2339,Gh_A06G0349,Gh_…
GO:1901564	organonitrogen compound metabolic process	biological_process	0.00087716	0.068711	40	202	5777	48611	Gh_D12G2711,Gh_A01G2111,Gh_D13G2339,Gh_Sca010487G02,Gh_A06G0349,Gh_A11G2358,Gh_D11G0730,Gh_A09G2323,Gh_D02G0877,Gh_A05G2854,Gh_A01G0843,Gh_A05G0713,Gh_D03G1781,Gh_A09G0362,Gh_A03G0149,Gh_Sca010487G03,Gh_D13G1464,Gh_D09G0269,Gh_A05G3831,Gh_D10G2202,Gh_D13G2069,Gh_A07G1603,Gh_A01G1126,Gh_A03G0725,Gh_D12G2404,Gh_A11G3033,Gh_D02G1538,Gh_D11G3196,Gh_D08G1212,Gh_A11G2238,Gh_A07G0166,Gh_A05G0700,Gh_D12G…
GO:0044710	single-organism metabolic process	biological_process	0.00097858	0.075333	70	202	11960	48611	Gh_A13G1907,Gh_A04G0970,Gh_A05G0700,Gh_D12G2422,Gh_D08G0085,Gh_A08G0871,Gh_D04G0898,Gh_A05G2374,Gh_D11G3194,Gh_D12G1468,Gh_Sca005787G06,Gh_A03G0734,Gh_D13G0686,Gh_D12G2404,Gh_Sca010487G03,Gh_D13G1464,Gh_D04G0469,Gh_D01G2275,Gh_A09G2247,Gh_A06G0406,Gh_D10G2202,Gh_A08G1668,Gh_D12G1932,Gh_D12G2711,Gh_D02G1418,Gh_D11G0730,Gh_A11G2358,Gh_A09G0411,Gh_A01G0843,Gh_A06G0349,Gh_Sca010487G02,Gh_Sca006756G06…
GO:0034641	cellular nitrogen compound metabolic process	biological_process	0.0010261	0.07765	80	202	14160	48611	Gh_A11G3033,Gh_D13G2004,Gh_A07G0876,Gh_D02G1538,Gh_D04G0317,Gh_A12G0777,Gh_A06G0222,Gh_A07G0166,Gh_A01G1083,Gh_A11G2238,Gh_D08G0567,Gh_A11G0922,Gh_D08G0270,Gh_A05G0978,Gh_D04G1994,Gh_A07G1240,Gh_D09G0593,Gh_D06G0894,Gh_D13G2339,Gh_A11G2663,Gh_A01G2111,Gh_D02G1093,Gh_D03G1781,Gh_A12G1973,Gh_A05G0713,Gh_A05G2854,Gh_D02G2152,Gh_A09G0362,Gh_A08G1584,Gh_A10G0578,Gh_A05G2494,Gh_D06G0759,Gh_D13G1470,Gh_…
GO:0098798	mitochondrial protein complex	cellular_component	0.0010749	0.07999	9	202	605	48611	Gh_A11G3033,Gh_D04G0469,Gh_D12G2404,Gh_D02G1538,Gh_A06G0349,Gh_D13G2339,Gh_A05G3831,Gh_A01G0843,Gh_D11G0730
GO:0006807	nitrogen compound metabolic process	biological_process	0.0011333	0.082956	83	202	14870	48611	Gh_Sca005611G02,Gh_D06G1600,Gh_D02G1685,Gh_D10G2202,Gh_D09G0587,Gh_Sca010487G03,Gh_D13G1464,Gh_D04G0469,Gh_A03G0149,Gh_A09G2247,Gh_D01G2275,Gh_D11G0730,Gh_A11G2358,Gh_D07G1578,Gh_D02G0877,Gh_A01G0843,Gh_A09G0411,Gh_A03G0296,Gh_Sca010487G02,Gh_D12G1363,Gh_A06G0349,Gh_D03G1091,Gh_D12G2711,Gh_A08G1015,Gh_D09G0615,Gh_D06G0902,Gh_A05G2374,Gh_A08G0871,Gh_A13G1907,Gh_D02G0790,Gh_D03G0729,Gh_D12G2422,Gh_…
GO:0008152	metabolic process	biological_process	0.001221	0.08793	139	202	28164	48611	Gh_Sca005646G04,Gh_D10G0130,Gh_A05G3831,Gh_D13G1470,Gh_A05G2494,Gh_A05G2246,Gh_D05G0815,Gh_D07G1209,Gh_A03G1334,Gh_D02G2152,Gh_A09G0362,Gh_D06G1866,Gh_A05G2854,Gh_A05G0713,Gh_A01G0311,Gh_D02G1093,Gh_A01G2111,Gh_A03G2022,Gh_D09G0593,Gh_A01G0842,Gh_D04G1996,Gh_D08G1218,Gh_A05G0978,Gh_D08G0270,Gh_A11G0922,Gh_D05G2242,Gh_A11G3013,Gh_D05G3936,Gh_A13G1968,Gh_A11G2238,Gh_A01G1083,Gh_D04G0317,Gh_D13G2004…
GO:1901360	organic cyclic compound metabolic process	biological_process	0.0012919	0.091561	73	202	12728	48611	Gh_A13G1907,Gh_D02G0790,Gh_D12G2422,Gh_A04G0970,Gh_D03G0729,Gh_D10G0292,Gh_A08G0871,Gh_D12G1468,Gh_D05G1158,Gh_D13G0686,Gh_D12G2404,Gh_D01G1124,Gh_Sca006892G01,Gh_D13G1464,Gh_Sca010487G03,Gh_D01G2275,Gh_A09G2247,Gh_A03G0149,Gh_D04G0469,Gh_D06G1600,Gh_D02G1685,Gh_Sca005611G02,Gh_D09G0587,Gh_D10G2202,Gh_D12G2711,Gh_D03G1091,Gh_D06G0902,Gh_D09G0615,Gh_A08G1015,Gh_D07G1578,Gh_A11G2358,Gh_D11G0730,Gh_…
GO:0045263	proton-transporting ATP synthase complex, coupling factor F(o)	cellular_component	0.0013141	0.091679	8	202	502	48611	Gh_A11G3033,Gh_D12G2404,Gh_A01G0843,Gh_A03G0725,Gh_D11G0730,Gh_A06G0349,Gh_A05G3831,Gh_A11G0922
GO:0006139	nucleobase-containing compound metabolic process	biological_process	0.0013688	0.094026	69	202	11887	48611	Gh_A08G0871,Gh_A04G0970,Gh_D03G0729,Gh_D10G0292,Gh_D02G0790,Gh_D13G0686,Gh_D12G2404,Gh_Sca006892G01,Gh_D01G1124,Gh_D12G1468,Gh_D05G1158,Gh_D09G0587,Gh_D10G2202,Gh_D06G1600,Gh_D02G1685,Gh_Sca005611G02,Gh_A09G2247,Gh_D01G2275,Gh_A03G0149,Gh_D04G0469,Gh_D13G1464,Gh_Sca010487G03,Gh_Sca010487G02,Gh_A03G0296,Gh_D12G1363,Gh_A06G0349,Gh_D07G1578,Gh_A11G2358,Gh_D11G0730,Gh_A01G0843,Gh_A09G0411,Gh_D02G0877…
GO:0000287	magnesium ion binding	molecular_function	0.0015018	0.1016	7	202	398	48611	Gh_Sca006756G06,Gh_A08G0871,Gh_A01G2111,Gh_D04G0317,Gh_Sca011694G01,Gh_D07G1807,Gh_A09G0362
GO:0005129	granulocyte macrophage colony-stimulating factor receptor binding	molecular_function	0.0017551	0.11696	2	202	15	48611	Gh_D10G2202,Gh_A11G0922
GO:0006796	phosphate-containing compound metabolic process	biological_process	0.0018598	0.12212	36	202	5235	48611	Gh_D04G1994,Gh_A08G0871,Gh_D05G2242,Gh_D02G0503,Gh_A11G0922,Gh_A05G0978,Gh_D02G1538,Gh_A11G3033,Gh_A06G1129,Gh_D13G0686,Gh_D12G2404,Gh_A03G0725,Gh_A07G1603,Gh_A12G1475,Gh_D09G0587,Gh_A05G1034,Gh_D10G2202,Gh_A05G3831,Gh_D10G0130,Gh_Sca006711G02,Gh_D13G1464,Gh_A05G2494,Gh_Sca010487G03,Gh_A09G0362,Gh_D06G1866,Gh_A01G0843,Gh_D11G0730,Gh_D01G0370,Gh_A11G2358,Gh_Sca010487G02,Gh_A06G0349,Gh_D13G2339,Gh_…
GO:0032991	macromolecular complex	cellular_component	0.0018973	0.12277	48	202	7617	48611	Gh_D08G1212,Gh_A12G0777,Gh_D07G0576,Gh_D04G0317,Gh_A11G2238,Gh_D12G2404,Gh_D13G0686,Gh_D01G1124,Gh_A11G3033,Gh_D02G1538,Gh_A12G1892,Gh_A07G0876,Gh_D11G3196,Gh_Sca005362G03,Gh_A05G0978,Gh_D08G0270,Gh_D08G0567,Gh_A11G0922,Gh_Sca007622G03,Gh_D08G1218,Gh_A05G2374,Gh_Sca006756G05,Gh_A01G2111,Gh_A06G0349,Gh_Sca010487G02,Gh_D13G2339,Gh_A11G2358,Gh_D11G0730,Gh_D07G1578,Gh_A01G0843,Gh_D02G0877,Gh_A05G2854…
GO:0006793	phosphorus metabolic process	biological_process	0.0019467	0.12417	36	202	5249	48611	Gh_A08G0871,Gh_D04G1994,Gh_A11G0922,Gh_D02G0503,Gh_D05G2242,Gh_A05G0978,Gh_D02G1538,Gh_A06G1129,Gh_A11G3033,Gh_D13G0686,Gh_D12G2404,Gh_Sca006711G02,Gh_A05G2494,Gh_Sca010487G03,Gh_D13G1464,Gh_A09G0362,Gh_A03G0725,Gh_A07G1603,Gh_A05G3831,Gh_D10G2202,Gh_D09G0587,Gh_A05G1034,Gh_A12G1475,Gh_D10G0130,Gh_A01G0842,Gh_A08G2132,Gh_D04G0576,Gh_D06G1866,Gh_A01G0843,Gh_D11G0730,Gh_D01G0370,Gh_A11G2358,Gh_Sca0…
GO:0006725	cellular aromatic compound metabolic process	biological_process	0.0020596	0.12952	71	202	12501	48611	Gh_A09G2247,Gh_A03G0149,Gh_D01G2275,Gh_D04G0469,Gh_D13G1464,Gh_Sca010487G03,Gh_D09G0587,Gh_D10G2202,Gh_D06G1600,Gh_D02G1685,Gh_Sca005611G02,Gh_D09G0615,Gh_D06G0902,Gh_A08G1015,Gh_D12G2711,Gh_D03G1091,Gh_D12G1363,Gh_Sca010487G02,Gh_A03G0296,Gh_A06G0349,Gh_D07G1578,Gh_A11G2358,Gh_D11G0730,Gh_D02G0877,Gh_A09G0411,Gh_A01G0843,Gh_A04G0970,Gh_D12G2422,Gh_D03G0729,Gh_D10G0292,Gh_D02G0790,Gh_A13G1907,Gh_…
GO:0046483	heterocycle metabolic process	biological_process	0.0021239	0.13171	71	202	12515	48611	Gh_D06G0894,Gh_D09G0593,Gh_A07G1240,Gh_D03G1781,Gh_A12G1973,Gh_A05G2854,Gh_D02G1093,Gh_D13G2339,Gh_A11G2663,Gh_A10G0578,Gh_A05G2494,Gh_A08G1584,Gh_A09G0362,Gh_D02G2152,Gh_A07G1603,Gh_A03G0725,Gh_D06G0759,Gh_D13G1470,Gh_A05G3831,Gh_D02G1538,Gh_D13G2004,Gh_A07G0876,Gh_A11G3033,Gh_A06G0222,Gh_A07G0166,Gh_A01G1083,Gh_A12G0777,Gh_D04G0317,Gh_D04G1994,Gh_D08G0270,Gh_A05G0978,Gh_A11G0922,Gh_D12G2711,Gh_…
GO:0000772	mating pheromone activity	molecular_function	0.0022584	0.13627	3	202	62	48611	Gh_A05G2494,Gh_A11G2358,Gh_D12G1363
GO:0048038	quinone binding	molecular_function	0.0022584	0.13627	3	202	62	48611	Gh_A01G2111,Gh_D13G0686,Gh_Sca006566G05
GO:0016021	integral component of membrane	cellular_component	0.002363	0.14068	43	202	6688	48611	Gh_D02G1620,Gh_A05G0700,Gh_Sca006756G05,Gh_D05G0705,Gh_A03G2036,Gh_D08G0270,Gh_Sca005362G03,Gh_Sca007622G03,Gh_A11G0922,Gh_D05G0890,Gh_D08G1218,Gh_D09G1694,Gh_D02G1538,Gh_D08G0417,Gh_D09G1825,Gh_D08G2349,Gh_D04G0317,Gh_A11G2238,Gh_A06G1258,Gh_A08G0319,Gh_Sca007035G04,Gh_A05G0716,Gh_D07G1209,Gh_D05G0815,Gh_A05G2494,Gh_Sca004751G01,Gh_Sca006711G02,Gh_A08G1668,Gh_Sca007622G02,Gh_D10G2202,Gh_A05G3831…
GO:0003735	structural constituent of ribosome	molecular_function	0.0024698	0.14279	15	202	1561	48611	Gh_D02G0877,Gh_A05G2854,Gh_A05G0713,Gh_D03G1781,Gh_A05G2374,Gh_A11G2358,Gh_A11G2238,Gh_A01G1126,Gh_A01G2111,Gh_D08G0567,Gh_D08G1212,Gh_D09G0269,Gh_D11G3196,Gh_A11G3033,Gh_A03G0149
GO:0005840	ribosome	cellular_component	0.0024847	0.14279	15	202	1562	48611	Gh_A11G3033,Gh_A03G0149,Gh_D11G3196,Gh_D09G0269,Gh_D08G1212,Gh_D08G0567,Gh_A01G2111,Gh_A01G1126,Gh_A11G2358,Gh_A11G2238,Gh_D03G1781,Gh_A05G0713,Gh_A05G2374,Gh_A05G2854,Gh_D02G0877
GO:0009156	ribonucleoside monophosphate biosynthetic process	biological_process	0.0024944	0.14279	9	202	685	48611	Gh_A03G0725,Gh_A01G0843,Gh_D11G0730,Gh_A06G0349,Gh_D10G2202,Gh_A11G0922,Gh_A05G3831,Gh_A11G3033,Gh_D12G2404
GO:0016469	proton-transporting two-sector ATPase complex	cellular_component	0.0029029	0.16368	11	202	979	48611	Gh_A11G3033,Gh_D12G2404,Gh_A03G0725,Gh_A01G0843,Gh_D11G0730,Gh_A11G2358,Gh_Sca010487G02,Gh_A06G0349,Gh_A11G0922,Gh_A05G3831,Gh_A05G0978
GO:0009124	nucleoside monophosphate biosynthetic process	biological_process	0.0029604	0.16368	9	202	703	48611	Gh_D12G2404,Gh_A11G3033,Gh_A06G0349,Gh_D10G2202,Gh_A05G3831,Gh_A11G0922,Gh_D11G0730,Gh_A03G0725,Gh_A01G0843
GO:0006396	RNA processing	biological_process	0.0029775	0.16368	12	202	1129	48611	Gh_D04G0469,Gh_D09G0615,Gh_D02G2152,Gh_D13G1470,Gh_D10G2202,Gh_A06G0349,Gh_A05G2854,Gh_A09G0411,Gh_A01G1083,Gh_D06G1600,Gh_D03G1781,Gh_A11G2358
GO:0048583	regulation of response to stimulus	biological_process	0.0030059	0.16368	6	202	336	48611	Gh_D10G2261,Gh_D10G2202,Gh_D05G2734,Gh_D08G0270,Gh_D06G1866,Gh_D09G0593
GO:0045259	proton-transporting ATP synthase complex	cellular_component	0.0031334	0.1666	8	202	578	48611	Gh_D11G0730,Gh_A03G0725,Gh_A01G0843,Gh_A06G0349,Gh_A11G0922,Gh_A05G3831,Gh_D12G2404,Gh_A11G3033
GO:1902600	hydrogen ion transmembrane transport	biological_process	0.0031342	0.1666	11	202	989	48611	Gh_A03G0725,Gh_A01G0843,Gh_A11G2358,Gh_D11G0730,Gh_A05G3831,Gh_A11G0922,Gh_Sca010487G02,Gh_A06G0349,Gh_A05G0978,Gh_A11G3033,Gh_D12G2404
GO:0044237	cellular metabolic process	biological_process	0.0032014	0.1671	109	202	21374	48611	Gh_A12G0777,Gh_D04G0317,Gh_A11G2238,Gh_A07G0166,Gh_A01G1083,Gh_A06G0222,Gh_A06G1129,Gh_A11G3033,Gh_D02G1538,Gh_A07G0876,Gh_D13G2004,Gh_Sca005362G03,Gh_A05G0978,Gh_D08G0270,Gh_D08G0567,Gh_A11G0922,Gh_D05G1075,Gh_D02G0503,Gh_Sca007622G03,Gh_D05G2242,Gh_D08G1218,Gh_D04G1994,Gh_D02G1620,Gh_A11G3013,Gh_D02G1093,Gh_A01G0311,Gh_A11G2663,Gh_A01G2111,Gh_D13G2339,Gh_D01G0370,Gh_A09G2323,Gh_D06G1866,Gh_A05G…
GO:0009163	nucleoside biosynthetic process	biological_process	0.0033074	0.1671	9	202	715	48611	Gh_A03G0725,Gh_A01G0843,Gh_D11G0730,Gh_D10G2202,Gh_A05G3831,Gh_A11G0922,Gh_A06G0349,Gh_A11G3033,Gh_D12G2404
GO:0042455	ribonucleoside biosynthetic process	biological_process	0.0033074	0.1671	9	202	715	48611	Gh_A06G0349,Gh_A05G3831,Gh_D10G2202,Gh_A11G0922,Gh_D11G0730,Gh_A01G0843,Gh_A03G0725,Gh_D12G2404,Gh_A11G3033
GO:0016491	oxidoreductase activity	molecular_function	0.0033287	0.1671	38	202	5813	48611	Gh_A07G1603,Gh_Sca005646G04,Gh_D10G1008,Gh_A08G1668,Gh_D10G2202,Gh_D13G1464,Gh_A05G2246,Gh_D06G0041,Gh_D10G1880,Gh_A09G2247,Gh_D04G0469,Gh_A11G2358,Gh_A09G0411,Gh_A01G0311,Gh_A01G2111,Gh_D06G0894,Gh_D12G1932,Gh_A10G0789,Gh_D09G0593,Gh_D02G1418,Gh_D08G0085,Gh_D08G1218,Gh_A05G2374,Gh_D08G0270,Gh_D05G1075,Gh_D12G2422,Gh_A04G0970,Gh_D10G1453,Gh_D05G3936,Gh_A13G1968,Gh_Sca006566G05,Gh_A12G0777,Gh_D12G…
GO:0050662	coenzyme binding	molecular_function	0.0033545	0.1671	12	202	1146	48611	Gh_A11G3033,Gh_D05G3936,Gh_D12G2422,Gh_D13G0686,Gh_D06G0041,Gh_D05G1075,Gh_D10G2202,Gh_A01G2111,Gh_D08G0270,Gh_Sca006566G05,Gh_A01G0311,Gh_A07G1603
GO:1901659	glycosyl compound biosynthetic process	biological_process	0.0033683	0.1671	9	202	717	48611	Gh_A11G3033,Gh_D12G2404,Gh_A06G0349,Gh_D10G2202,Gh_A05G3831,Gh_A11G0922,Gh_A03G0725,Gh_A01G0843,Gh_D11G0730
GO:0031224	intrinsic component of membrane	cellular_component	0.0034436	0.16896	43	202	6824	48611	Gh_D08G1218,Gh_D05G0890,Gh_A11G0922,Gh_Sca007622G03,Gh_Sca005362G03,Gh_D08G0270,Gh_A03G2036,Gh_D05G0705,Gh_Sca006756G05,Gh_D02G1620,Gh_A05G0700,Gh_A06G1258,Gh_A08G0319,Gh_A11G2238,Gh_D04G0317,Gh_D08G2349,Gh_D09G1825,Gh_D08G0417,Gh_D02G1538,Gh_D09G1694,Gh_D10G2202,Gh_Sca007622G02,Gh_A05G3831,Gh_A08G1668,Gh_Sca006711G02,Gh_A05G2494,Gh_Sca004751G01,Gh_D07G1209,Gh_D05G0815,Gh_A05G0716,Gh_Sca007035G04…
GO:0004003	ATP-dependent DNA helicase activity	molecular_function	0.0035915	0.17431	3	202	73	48611	Gh_D10G2202,Gh_D04G0317,Gh_A07G1240
GO:0015985	energy coupled proton transport, down electrochemical gradient	biological_process	0.0036912	0.17533	8	202	594	48611	Gh_A01G0843,Gh_A03G0725,Gh_D11G0730,Gh_A06G0349,Gh_A11G0922,Gh_A05G3831,Gh_A11G3033,Gh_D12G2404
GO:0015986	ATP synthesis coupled proton transport	biological_process	0.0036912	0.17533	8	202	594	48611	Gh_D11G0730,Gh_A03G0725,Gh_A01G0843,Gh_A05G3831,Gh_A11G0922,Gh_A06G0349,Gh_D12G2404,Gh_A11G3033
GO:0006754	ATP biosynthetic process	biological_process	0.0041986	0.19672	8	202	607	48611	Gh_A11G0922,Gh_A05G3831,Gh_A06G0349,Gh_D11G0730,Gh_A01G0843,Gh_A03G0725,Gh_D12G2404,Gh_A11G3033
GO:0005525	GTP binding	molecular_function	0.0042877	0.19672	13	202	1337	48611	Gh_Sca010487G02,Gh_D10G2202,Gh_A05G3831,Gh_D07G0576,Gh_A12G0777,Gh_D05G0636,Gh_A11G2358,Gh_A07G1240,Gh_A11G3033,Gh_D11G3196,Gh_Sca010487G03,Gh_Sca004751G01,Gh_D04G0583
GO:0008137	NADH dehydrogenase (ubiquinone) activity	molecular_function	0.0043414	0.19672	5	202	253	48611	Gh_D10G2202,Gh_A10G0789,Gh_D13G1464,Gh_A03G0734,Gh_Sca005646G04
GO:0050136	NADH dehydrogenase (quinone) activity	molecular_function	0.0043414	0.19672	5	202	253	48611	Gh_Sca005646G04,Gh_A03G0734,Gh_D13G1464,Gh_A10G0789,Gh_D10G2202
GO:0008094	DNA-dependent ATPase activity	molecular_function	0.0043618	0.19672	4	202	157	48611	Gh_A07G1240,Gh_D04G0317,Gh_D10G2202,Gh_A05G3831
GO:0009260	ribonucleotide biosynthetic process	biological_process	0.0045441	0.19672	9	202	751	48611	Gh_A03G0725,Gh_A01G0843,Gh_D11G0730,Gh_D10G2202,Gh_A11G0922,Gh_A05G3831,Gh_A06G0349,Gh_A11G3033,Gh_D12G2404
GO:0046390	ribose phosphate biosynthetic process	biological_process	0.0045441	0.19672	9	202	751	48611	Gh_D11G0730,Gh_A03G0725,Gh_A01G0843,Gh_A06G0349,Gh_D10G2202,Gh_A11G0922,Gh_A05G3831,Gh_D12G2404,Gh_A11G3033
GO:0016831	carboxy-lyase activity	molecular_function	0.0045513	0.19672	6	202	366	48611	Gh_Sca011694G01,Gh_D07G1807,Gh_A01G2111,Gh_A11G3033,Gh_A11G2358,Gh_Sca006756G06
GO:0044699	single-organism process	biological_process	0.0045776	0.19672	103	202	20162	48611	Gh_D02G1620,Gh_D07G1807,Gh_D10G1453,Gh_D05G3936,Gh_A11G3013,Gh_Sca006756G06,Gh_D08G0270,Gh_A05G0978,Gh_D05G2242,Gh_D05G1075,Gh_A11G0922,Gh_D02G0503,Gh_D05G0890,Gh_D04G1994,Gh_A11G3033,Gh_D02G1538,Gh_D06G1339,Gh_D09G1825,Gh_Sca006566G05,Gh_A12G0777,Gh_D07G0576,Gh_D04G0317,Gh_A11G2238,Gh_A06G1258,Gh_A07G0166,Gh_D06G0041,Gh_A09G0362,Gh_Sca011694G01,Gh_D10G1880,Gh_D07G1209,Gh_D05G0815,Gh_A05G2246,Gh_…
GO:0032561	guanyl ribonucleotide binding	molecular_function	0.0045868	0.19672	13	202	1348	48611	Gh_D04G0583,Gh_Sca010487G03,Gh_Sca004751G01,Gh_D11G3196,Gh_A07G1240,Gh_A11G3033,Gh_A11G2358,Gh_D05G0636,Gh_A12G0777,Gh_D07G0576,Gh_Sca010487G02,Gh_D10G2202,Gh_A05G3831
GO:0009142	nucleoside triphosphate biosynthetic process	biological_process	0.0047582	0.19672	8	202	620	48611	Gh_A06G0349,Gh_A05G3831,Gh_A11G0922,Gh_D11G0730,Gh_A03G0725,Gh_A01G0843,Gh_D12G2404,Gh_A11G3033
GO:0009145	purine nucleoside triphosphate biosynthetic process	biological_process	0.0047582	0.19672	8	202	620	48611	Gh_A06G0349,Gh_A05G3831,Gh_A11G0922,Gh_D11G0730,Gh_A01G0843,Gh_A03G0725,Gh_D12G2404,Gh_A11G3033
GO:0009201	ribonucleoside triphosphate biosynthetic process	biological_process	0.0047582	0.19672	8	202	620	48611	Gh_A03G0725,Gh_A01G0843,Gh_D11G0730,Gh_A05G3831,Gh_A11G0922,Gh_A06G0349,Gh_A11G3033,Gh_D12G2404
GO:0009206	purine ribonucleoside triphosphate biosynthetic process	biological_process	0.0047582	0.19672	8	202	620	48611	Gh_A06G0349,Gh_A11G0922,Gh_A05G3831,Gh_D11G0730,Gh_A01G0843,Gh_A03G0725,Gh_D12G2404,Gh_A11G3033
GO:0033177	proton-transporting two-sector ATPase complex, proton-transporting domain	cellular_component	0.0049034	0.20086	9	202	760	48611	Gh_D11G0730,Gh_A11G2358,Gh_A03G0725,Gh_A01G0843,Gh_A06G0349,Gh_A05G3831,Gh_A11G0922,Gh_D12G2404,Gh_A11G3033
GO:0022900	electron transport chain	biological_process	0.0049834	0.20228	6	202	373	48611	Gh_D13G2339,Gh_Sca005362G04,Gh_D02G1620,Gh_D13G1464,Gh_Sca005787G06,Gh_D02G1538
GO:0003954	NADH dehydrogenase activity	molecular_function	0.0051055	0.20466	5	202	263	48611	Gh_A03G0734,Gh_Sca005646G04,Gh_A10G0789,Gh_D13G1464,Gh_D10G2202
GO:0019001	guanyl nucleotide binding	molecular_function	0.005143	0.20466	13	202	1367	48611	Gh_A11G2358,Gh_D05G0636,Gh_D07G0576,Gh_A12G0777,Gh_Sca010487G02,Gh_A05G3831,Gh_D10G2202,Gh_Sca010487G03,Gh_D04G0583,Gh_Sca004751G01,Gh_D11G3196,Gh_A07G1240,Gh_A11G3033
GO:0005750	mitochondrial respiratory chain complex III	cellular_component	0.0052711	0.20466	2	202	26	48611	Gh_D02G1538,Gh_D13G2339
GO:0006122	mitochondrial electron transport, ubiquinol to cytochrome c	biological_process	0.0052711	0.20466	2	202	26	48611	Gh_D02G1538,Gh_D13G2339
GO:0045275	respiratory chain complex III	cellular_component	0.0052711	0.20466	2	202	26	48611	Gh_D02G1538,Gh_D13G2339
GO:0045444	fat cell differentiation	biological_process	0.005499	0.21071	3	202	85	48611	Gh_A11G0922,Gh_D04G0583,Gh_A11G2358
GO:0051287	NAD binding	molecular_function	0.0055213	0.21071	5	202	268	48611	Gh_A11G3033,Gh_A01G2111,Gh_D10G2202,Gh_D13G0686,Gh_Sca006566G05
GO:0044281	small molecule metabolic process	biological_process	0.0061837	0.23399	26	202	3693	48611	Gh_D04G1994,Gh_A08G0871,Gh_A03G0725,Gh_A07G1603,Gh_D13G2069,Gh_A05G3831,Gh_D10G2202,Gh_A11G0922,Gh_A05G0978,Gh_D13G1464,Gh_Sca010487G03,Gh_D12G2422,Gh_A05G0700,Gh_A09G0362,Gh_A01G0843,Gh_A07G0166,Gh_D11G0730,Gh_A11G2358,Gh_A06G0349,Gh_Sca010487G02,Gh_D13G2339,Gh_D12G2711,Gh_D02G1538,Gh_A11G3033,Gh_D13G0686,Gh_D12G2404
GO:0016071	mRNA metabolic process	biological_process	0.0065378	0.24531	6	202	395	48611	Gh_D03G1781,Gh_A05G2854,Gh_D13G2339,Gh_A06G0349,Gh_D04G0469,Gh_A11G2663
GO:0009127	purine nucleoside monophosphate biosynthetic process	biological_process	0.0067255	0.24818	8	202	658	48611	Gh_A05G3831,Gh_A11G0922,Gh_A06G0349,Gh_D11G0730,Gh_A01G0843,Gh_A03G0725,Gh_D12G2404,Gh_A11G3033
GO:0009168	purine ribonucleoside monophosphate biosynthetic process	biological_process	0.0067255	0.24818	8	202	658	48611	Gh_D12G2404,Gh_A11G3033,Gh_D11G0730,Gh_A01G0843,Gh_A03G0725,Gh_A06G0349,Gh_A11G0922,Gh_A05G3831
GO:0043234	protein complex	cellular_component	0.0071205	0.2606	37	202	5886	48611	Gh_A03G0725,Gh_Sca007622G02,Gh_A05G3831,Gh_D09G0587,Gh_Sca006711G02,Gh_D04G0469,Gh_D01G2275,Gh_A03G0149,Gh_Sca007035G04,Gh_A01G0843,Gh_D03G1781,Gh_D11G0730,Gh_A11G2358,Gh_D07G1578,Gh_Sca010487G02,Gh_A06G0349,Gh_D13G2339,Gh_A07G1608,Gh_D06G0894,Gh_Sca005362G04,Gh_D08G1218,Gh_A11G0922,Gh_Sca007622G03,Gh_Sca005362G03,Gh_A05G0978,Gh_D08G0270,Gh_Sca006756G05,Gh_D04G0317,Gh_A12G0777,Gh_D07G0576,Gh_A07G…
GO:0015672	monovalent inorganic cation transport	biological_process	0.0075708	0.27482	14	202	1599	48611	Gh_D12G2404,Gh_A11G3033,Gh_Sca010487G03,Gh_D07G1209,Gh_A05G0978,Gh_A05G3831,Gh_A11G0922,Gh_A06G0349,Gh_Sca010487G02,Gh_A11G2358,Gh_D11G0730,Gh_A03G0725,Gh_A01G0843,Gh_D04G1994
GO:0019684	photosynthesis, light reaction	biological_process	0.0083214	0.29732	4	202	189	48611	Gh_Sca005362G04,Gh_D13G2339,Gh_A08G1015,Gh_Sca005787G06
GO:0042451	purine nucleoside biosynthetic process	biological_process	0.0083902	0.29732	8	202	684	48611	Gh_A11G3033,Gh_D12G2404,Gh_A03G0725,Gh_A01G0843,Gh_D11G0730,Gh_A05G3831,Gh_A11G0922,Gh_A06G0349
GO:0046129	purine ribonucleoside biosynthetic process	biological_process	0.0083902	0.29732	8	202	684	48611	Gh_D12G2404,Gh_A11G3033,Gh_D11G0730,Gh_A01G0843,Gh_A03G0725,Gh_A11G0922,Gh_A05G3831,Gh_A06G0349
GO:0006091	generation of precursor metabolites and energy	biological_process	0.0088251	0.31027	9	202	835	48611	Gh_D13G1464,Gh_D02G1538,Gh_Sca005787G06,Gh_D02G1620,Gh_A09G0362,Gh_A08G1015,Gh_Sca005362G04,Gh_A08G0871,Gh_D13G2339
GO:0048037	cofactor binding	molecular_function	0.0089319	0.31157	13	202	1465	48611	Gh_A07G1603,Gh_A01G0311,Gh_D08G0270,Gh_Sca006566G05,Gh_D05G1075,Gh_D10G2202,Gh_A01G2111,Gh_A07G1608,Gh_D13G0686,Gh_D06G0041,Gh_D12G2422,Gh_D05G3936,Gh_A11G3033
GO:0009165	nucleotide biosynthetic process	biological_process	0.0092192	0.3191	9	202	841	48611	Gh_D12G2404,Gh_A11G3033,Gh_A05G3831,Gh_D10G2202,Gh_A11G0922,Gh_A06G0349,Gh_D11G0730,Gh_A03G0725,Gh_A01G0843
GO:0016020	membrane	cellular_component	0.0097766	0.33401	71	202	13280	48611	Gh_D02G1649,Gh_A04G1404,Gh_D06G0902,Gh_A01G1191,Gh_D12G1932,Gh_A08G2132,Gh_A07G1608,Gh_D12G2711,Gh_A12G0331,Gh_D06G0982,Gh_Sca010487G02,Gh_A06G0349,Gh_D11G0730,Gh_A11G2358,Gh_A01G0843,Gh_Sca007035G04,Gh_D04G0469,Gh_A05G0716,Gh_Sca004751G01,Gh_Sca006711G02,Gh_D10G2202,Gh_D09G0587,Gh_A08G1668,Gh_D02G1685,Gh_D13G0438,Gh_D13G0686,Gh_D12G2404,Gh_D09G1694,Gh_Sca006756G05,Gh_A05G0700,Gh_A03G2036,Gh_D11G…
GO:0000276	mitochondrial proton-transporting ATP synthase complex, coupling factor F(o)	cellular_component	0.0097997	0.33401	6	202	431	48611	Gh_D12G2404,Gh_A05G3831,Gh_A11G3033,Gh_A06G0349,Gh_D11G0730,Gh_A01G0843
GO:1901293	nucleoside phosphate biosynthetic process	biological_process	0.0099056	0.33507	9	202	851	48611	Gh_A03G0725,Gh_A01G0843,Gh_D11G0730,Gh_A05G3831,Gh_D10G2202,Gh_A11G0922,Gh_A06G0349,Gh_A11G3033,Gh_D12G2404
GO:0006364	rRNA processing	biological_process	0.010092	0.33627	4	202	200	48611	Gh_D02G2152,Gh_A11G2358,Gh_D06G1600,Gh_A09G0411
GO:0016072	rRNA metabolic process	biological_process	0.010092	0.33627	4	202	200	48611	Gh_A11G2358,Gh_D06G1600,Gh_A09G0411,Gh_D02G2152
GO:0019867	outer membrane	cellular_component	0.01033	0.33941	6	202	436	48611	Gh_A11G2358,Gh_D12G2711,Gh_D06G0902,Gh_D13G0438,Gh_A05G0716,Gh_D10G2202
GO:0031090	organelle membrane	cellular_component	0.010338	0.33941	15	202	1832	48611	Gh_D02G1538,Gh_D12G2711,Gh_D12G2404,Gh_D13G0686,Gh_D04G0469,Gh_A05G0716,Gh_D05G0705,Gh_A11G3033,Gh_A11G2358,Gh_D11G0730,Gh_A01G0843,Gh_A12G0777,Gh_A05G3831,Gh_D13G2339,Gh_A06G0349
GO:0008053	mitochondrial fusion	biological_process	0.010482	0.34162	2	202	37	48611	Gh_A05G0716,Gh_A11G2358
GO:0044764	multi-organism cellular process	biological_process	0.010873	0.3518	15	202	1843	48611	Gh_D04G0317,Gh_D02G0503,Gh_D10G2202,Gh_D08G0417,Gh_A08G0319,Gh_A11G2358,Gh_A04G0970,Gh_A04G1404,Gh_D13G0438,Gh_A07G1702,Gh_D13G2004,Gh_Sca004751G01,Gh_D04G0583,Gh_A05G2494,Gh_A07G2043
GO:0009152	purine ribonucleotide biosynthetic process	biological_process	0.011531	0.3704	8	202	724	48611	Gh_D12G2404,Gh_A11G3033,Gh_A11G0922,Gh_A05G3831,Gh_A06G0349,Gh_D11G0730,Gh_A01G0843,Gh_A03G0725
GO:0044444	cytoplasmic part	cellular_component	0.01196	0.38144	31	202	4879	48611	Gh_A05G0716,Gh_A03G0149,Gh_D04G0469,Gh_A01G1126,Gh_A05G2374,Gh_D09G0269,Gh_A05G3831,Gh_D08G0567,Gh_A12G1892,Gh_D02G1538,Gh_D12G2711,Gh_A07G1608,Gh_D11G3196,Gh_D13G0686,Gh_D12G2404,Gh_A11G3033,Gh_D01G1124,Gh_A11G2358,Gh_D11G0730,Gh_A11G2238,Gh_D03G1781,Gh_A05G0713,Gh_A12G0816,Gh_D02G0877,Gh_A01G0843,Gh_A05G2854,Gh_A12G0777,Gh_D08G1212,Gh_D13G2339,Gh_A06G0349,Gh_A01G2111
GO:0003941	L-serine ammonia-lyase activity	molecular_function	0.012466	0.38962	1	202	3	48611	Gh_A06G0406
GO:0004127	cytidylate kinase activity	molecular_function	0.012466	0.38962	1	202	3	48611	Gh_D13G2004
GO:0005198	structural molecule activity	molecular_function	0.012478	0.38962	20	202	2774	48611	Gh_A05G3831,Gh_D08G0567,Gh_D09G0269,Gh_A05G2374,Gh_A01G1126,Gh_A03G0149,Gh_A05G2494,Gh_A10G0578,Gh_A01G2111,Gh_D04G0317,Gh_D08G1212,Gh_D02G0877,Gh_A05G2854,Gh_D03G1781,Gh_A05G0713,Gh_A11G2358,Gh_A11G2238,Gh_D01G1124,Gh_A11G3033,Gh_D11G3196
GO:0006164	purine nucleotide biosynthetic process	biological_process	0.012908	0.40023	8	202	739	48611	Gh_D11G0730,Gh_A03G0725,Gh_A01G0843,Gh_A06G0349,Gh_A05G3831,Gh_A11G0922,Gh_D12G2404,Gh_A11G3033
GO:0009084	glutamine family amino acid biosynthetic process	biological_process	0.013368	0.41071	2	202	42	48611	Gh_D12G2422,Gh_A05G0700
GO:0098655	cation transmembrane transport	biological_process	0.013551	0.41071	11	202	1214	48611	Gh_A11G3033,Gh_D12G2404,Gh_A01G0843,Gh_A03G0725,Gh_A11G2358,Gh_D11G0730,Gh_A11G0922,Gh_A05G3831,Gh_Sca010487G02,Gh_A06G0349,Gh_A05G0978
GO:0098662	inorganic cation transmembrane transport	biological_process	0.013551	0.41071	11	202	1214	48611	Gh_D12G2404,Gh_A11G3033,Gh_D11G0730,Gh_A11G2358,Gh_A03G0725,Gh_A01G0843,Gh_A05G0978,Gh_A11G0922,Gh_A05G3831,Gh_A06G0349,Gh_Sca010487G02
GO:0016655	oxidoreductase activity, acting on NAD(P)H, quinone or similar compound as acceptor	molecular_function	0.013765	0.41071	5	202	336	48611	Gh_D10G2202,Gh_D13G1464,Gh_A10G0789,Gh_A03G0734,Gh_Sca005646G04
GO:0004888	transmembrane signaling receptor activity	molecular_function	0.013816	0.41071	6	202	465	48611	Gh_A01G0843,Gh_D13G1348,Gh_A07G1608,Gh_D09G1694,Gh_D05G0815,Gh_D11G0730
GO:0098660	inorganic ion transmembrane transport	biological_process	0.013855	0.41071	11	202	1218	48611	Gh_D12G2404,Gh_A11G3033,Gh_A11G2358,Gh_D11G0730,Gh_A03G0725,Gh_A01G0843,Gh_A05G0978,Gh_Sca010487G02,Gh_A06G0349,Gh_A05G3831,Gh_A11G0922
GO:0005753	mitochondrial proton-transporting ATP synthase complex	cellular_component	0.013949	0.41071	6	202	466	48611	Gh_A01G0843,Gh_D11G0730,Gh_A11G3033,Gh_A06G0349,Gh_A05G3831,Gh_D12G2404
GO:0000184	nuclear-transcribed mRNA catabolic process, nonsense-mediated decay	biological_process	0.013982	0.41071	2	202	43	48611	Gh_D13G2339,Gh_A11G2663
GO:0004930	G-protein coupled receptor activity	molecular_function	0.014112	0.41182	4	202	221	48611	Gh_D13G1348,Gh_D11G0730,Gh_D09G1694,Gh_D05G0815
GO:0005746	mitochondrial respiratory chain	cellular_component	0.015344	0.43427	3	202	124	48611	Gh_A12G0777,Gh_D13G2339,Gh_D02G1538
GO:0072522	purine-containing compound biosynthetic process	biological_process	0.015685	0.43427	8	202	766	48611	Gh_D12G2404,Gh_A11G3033,Gh_A05G3831,Gh_A11G0922,Gh_A06G0349,Gh_D11G0730,Gh_A01G0843,Gh_A03G0725
GO:0000956	nuclear-transcribed mRNA catabolic process	biological_process	0.015895	0.43427	2	202	46	48611	Gh_D13G2339,Gh_A11G2663
GO:0048284	organelle fusion	biological_process	0.015895	0.43427	2	202	46	48611	Gh_A05G0716,Gh_A11G2358
GO:0010496	intercellular transport	biological_process	0.016008	0.43427	3	202	126	48611	Gh_D08G0417,Gh_A05G2494,Gh_A08G0319
GO:0044000	movement in host	biological_process	0.016008	0.43427	3	202	126	48611	Gh_A05G2494,Gh_A08G0319,Gh_D08G0417
GO:0046739	transport of virus in multicellular host	biological_process	0.016008	0.43427	3	202	126	48611	Gh_A05G2494,Gh_A08G0319,Gh_D08G0417
GO:0046740	transport of virus in host, cell to cell	biological_process	0.016008	0.43427	3	202	126	48611	Gh_D08G0417,Gh_A08G0319,Gh_A05G2494
GO:0051814	movement in other organism involved in symbiotic interaction	biological_process	0.016008	0.43427	3	202	126	48611	Gh_A05G2494,Gh_A08G0319,Gh_D08G0417
GO:0060590	ATPase regulator activity	molecular_function	0.016008	0.43427	3	202	126	48611	Gh_A11G2358,Gh_A07G1608,Gh_D05G2242
GO:1902586	multi-organism intercellular transport	biological_process	0.016008	0.43427	3	202	126	48611	Gh_D08G0417,Gh_A08G0319,Gh_A05G2494
GO:0030529	ribonucleoprotein complex	cellular_component	0.016048	0.43427	15	202	1932	48611	Gh_A11G2358,Gh_A11G2238,Gh_A01G1126,Gh_D02G0877,Gh_A05G2854,Gh_D03G1781,Gh_A05G2374,Gh_A05G0713,Gh_D08G1212,Gh_D09G0269,Gh_A01G2111,Gh_D08G0567,Gh_D11G3196,Gh_A03G0149,Gh_A11G3033
GO:0008962	phosphatidylglycerophosphatase activity	molecular_function	0.016586	0.44346	1	202	4	48611	Gh_A01G0843
GO:0070403	NAD+ binding	molecular_function	0.016586	0.44346	1	202	4	48611	Gh_D10G2202
GO:0055085	transmembrane transport	biological_process	0.016893	0.44896	22	202	3240	48611	Gh_D02G1620,Gh_A08G1668,Gh_A11G0922,Gh_A05G3831,Gh_A05G0978,Gh_D02G1685,Gh_A03G0725,Gh_D05G0890,Gh_A11G3033,Gh_A01G1191,Gh_D12G2404,Gh_D13G0686,Gh_D04G0583,Gh_Sca010487G02,Gh_A06G0349,Gh_D09G1825,Gh_A12G0777,Gh_A12G0331,Gh_A06G1258,Gh_A01G0843,Gh_D11G0730,Gh_A11G2358
GO:0006094	gluconeogenesis	biological_process	0.01723	0.45253	2	202	48	48611	Gh_A11G3033,Gh_A06G0406
GO:0018144	RNA-protein covalent cross-linking	biological_process	0.01723	0.45253	2	202	48	48611	Gh_A05G2494,Gh_A11G2358
GO:0016830	carbon-carbon lyase activity	molecular_function	0.017419	0.45482	6	202	490	48611	Gh_A11G2358,Gh_Sca006756G06,Gh_D07G1807,Gh_Sca011694G01,Gh_A01G2111,Gh_A11G3033
GO:0044801	single-organism membrane fusion	biological_process	0.017914	0.46315	2	202	49	48611	Gh_A05G0716,Gh_A11G2358
GO:0042025	host cell nucleus	cellular_component	0.018017	0.46315	4	202	238	48611	Gh_A05G3831,Gh_A09G2247,Gh_A12G0777,Gh_A11G2358
GO:0003924	GTPase activity	molecular_function	0.018049	0.46315	9	202	942	48611	Gh_Sca010487G03,Gh_D04G0583,Gh_D11G3196,Gh_A07G1240,Gh_A05G0716,Gh_A11G2358,Gh_Sca010487G02,Gh_A05G3831,Gh_D10G2202
GO:0060589	nucleoside-triphosphatase regulator activity	molecular_function	0.018266	0.46604	4	202	239	48611	Gh_D05G2242,Gh_D06G1866,Gh_A07G1608,Gh_A11G2358
GO:0070469	respiratory chain	cellular_component	0.019194	0.48693	3	202	135	48611	Gh_D02G1538,Gh_A12G0777,Gh_D13G2339
GO:1901137	carbohydrate derivative biosynthetic process	biological_process	0.019656	0.49583	13	202	1627	48611	Gh_A11G3033,Gh_D12G2404,Gh_A03G0725,Gh_A01G0843,Gh_D11G0730,Gh_A11G2358,Gh_A06G0349,Gh_D05G2242,Gh_D10G2202,Gh_D02G0503,Gh_A05G3831,Gh_A11G0922,Gh_D10G0130
GO:0019072	viral genome packaging	biological_process	0.020035	0.50257	2	202	52	48611	Gh_D02G0503,Gh_A11G2358
GO:0019075	virus maturation	biological_process	0.02069	0.51223	1	202	5	48611	Gh_D04G0583
GO:0046797	viral procapsid maturation	biological_process	0.02069	0.51223	1	202	5	48611	Gh_D04G0583
GO:0004725	protein tyrosine phosphatase activity	molecular_function	0.020765	0.51223	2	202	53	48611	Gh_A11G0922,Gh_D04G0576
GO:0003964	RNA-directed DNA polymerase activity	molecular_function	0.021633	0.53072	7	202	661	48611	Gh_D10G2202,Gh_A11G0922,Gh_A08G1015,Gh_D06G0902,Gh_D08G0270,Gh_D09G0593,Gh_A11G2358
GO:0006278	RNA-dependent DNA replication	biological_process	0.021947	0.53549	7	202	663	48611	Gh_D10G2202,Gh_A11G0922,Gh_D08G0270,Gh_D06G0902,Gh_A08G1015,Gh_D09G0593,Gh_A11G2358
GO:0008083	growth factor activity	molecular_function	0.022299	0.5411	3	202	143	48611	Gh_A12G0777,Gh_D10G2202,Gh_A11G0922
GO:0008270	zinc ion binding	molecular_function	0.022805	0.54591	26	202	4124	48611	Gh_A09G0362,Gh_D03G0729,Gh_D13G1518,Gh_A11G3013,Gh_A05G2494,Gh_A05G2246,Gh_D08G0270,Gh_A05G1584,Gh_D10G2202,Gh_D13G1470,Gh_A05G3831,Gh_A11G0922,Gh_A06G0406,Gh_D06G0902,Gh_D13G0686,Gh_D05G3040,Gh_A08G1015,Gh_D06G0894,Gh_A12G1892,Gh_D09G0593,Gh_D05G1158,Gh_A07G1608,Gh_D07G0576,Gh_A11G2663,Gh_D07G1578,Gh_A11G2358
GO:0019319	hexose biosynthetic process	biological_process	0.023018	0.54591	2	202	56	48611	Gh_A11G3033,Gh_A06G0406
GO:0046364	monosaccharide biosynthetic process	biological_process	0.023018	0.54591	2	202	56	48611	Gh_A11G3033,Gh_A06G0406
GO:0033647	host intracellular organelle	cellular_component	0.023108	0.54591	4	202	257	48611	Gh_A11G2358,Gh_A12G0777,Gh_A05G3831,Gh_A09G2247
GO:0033648	host intracellular membrane-bounded organelle	cellular_component	0.023108	0.54591	4	202	257	48611	Gh_A11G2358,Gh_A12G0777,Gh_A09G2247,Gh_A05G3831
GO:0034470	ncRNA processing	biological_process	0.023401	0.54992	7	202	672	48611	Gh_D10G2202,Gh_D09G0615,Gh_D02G2152,Gh_D06G1600,Gh_A01G1083,Gh_A09G0411,Gh_A11G2358
GO:0018143	nucleic acid-protein covalent cross-linking	biological_process	0.02379	0.55614	2	202	57	48611	Gh_A05G2494,Gh_A11G2358
GO:0004743	pyruvate kinase activity	molecular_function	0.024573	0.57146	2	202	58	48611	Gh_A09G0362,Gh_A08G0871
GO:0017070	U6 snRNA binding	molecular_function	0.024777	0.5732	1	202	6	48611	Gh_D10G2202
GO:0007165	signal transduction	biological_process	0.024922	0.57358	20	202	2981	48611	Gh_D06G0894,Gh_D09G0593,Gh_A12G0777,Gh_D10G2261,Gh_A03G0296,Gh_D05G2734,Gh_A11G2358,Gh_D11G0730,Gh_D02G0146,Gh_A09G0411,Gh_D13G1348,Gh_D06G1866,Gh_A07G1965,Gh_A11G3013,Gh_D08G0270,Gh_A05G3831,Gh_D13G1470,Gh_D10G2202,Gh_D06G0759,Gh_D02G1619
GO:0070851	growth factor receptor binding	molecular_function	0.025367	0.57866	2	202	59	48611	Gh_A11G0922,Gh_D10G2202
GO:0044766	multi-organism transport	biological_process	0.025661	0.57866	3	202	151	48611	Gh_A05G2494,Gh_A08G0319,Gh_D08G0417
GO:0046794	transport of virus	biological_process	0.025661	0.57866	3	202	151	48611	Gh_D08G0417,Gh_A08G0319,Gh_A05G2494
GO:1902579	multi-organism localization	biological_process	0.025661	0.57866	3	202	151	48611	Gh_D08G0417,Gh_A05G2494,Gh_A08G0319
GO:0046872	metal ion binding	molecular_function	0.025887	0.57976	44	202	7911	48611	Gh_D07G1807,Gh_D03G0729,Gh_D13G1518,Gh_A11G3013,Gh_Sca006756G06,Gh_A05G1584,Gh_D08G0270,Gh_A11G0922,Gh_D08G0085,Gh_A08G0871,Gh_D13G0686,Gh_A12G1892,Gh_D12G1468,Gh_D05G1158,Gh_D07G0576,Gh_D04G0317,Gh_D05G2675,Gh_Sca011694G01,Gh_A09G0362,Gh_A09G2247,Gh_A03G0149,Gh_A05G2246,Gh_A05G2494,Gh_D10G0130,Gh_D10G1008,Gh_A05G3831,Gh_Sca007622G02,Gh_D13G1470,Gh_D10G2202,Gh_A06G0406,Gh_D05G3040,Gh_A08G1015,Gh_…
GO:0016893	endonuclease activity, active with either ribo- or deoxyribonucleic acids and producing 5'-phosphomonoesters	molecular_function	0.025969	0.57976	7	202	687	48611	Gh_D05G1158,Gh_A11G2358,Gh_D01G2275,Gh_D04G0317,Gh_D10G2202,Gh_D08G0270,Gh_A12G0777
GO:0005737	cytoplasm	cellular_component	0.0274	0.60867	36	202	6246	48611	Gh_D05G2242,Gh_A11G0922,Gh_D08G0567,Gh_A05G2374,Gh_A12G0777,Gh_D08G1212,Gh_A11G2238,Gh_A11G3033,Gh_D01G1124,Gh_D12G2404,Gh_D13G0686,Gh_D11G3196,Gh_A12G1892,Gh_D02G1538,Gh_A05G3831,Gh_D09G0269,Gh_A01G1126,Gh_D13G2069,Gh_A05G0716,Gh_A03G0149,Gh_D04G0469,Gh_D13G2339,Gh_A06G0349,Gh_A01G2111,Gh_A11G2663,Gh_A05G0713,Gh_D03G1781,Gh_A05G2854,Gh_D02G0877,Gh_A12G0816,Gh_A01G0843,Gh_D11G0730,Gh_A11G2358,Gh_…
GO:0006810	transport	biological_process	0.02796	0.61332	45	202	8166	48611	Gh_A06G1258,Gh_A08G0319,Gh_D08G0417,Gh_D09G1825,Gh_A12G0777,Gh_D12G2404,Gh_D13G0686,Gh_D01G1124,Gh_A11G3033,Gh_D05G0890,Gh_D04G1994,Gh_A05G0978,Gh_A11G0922,Gh_D05G2242,Gh_A05G0700,Gh_D02G1620,Gh_D10G1453,Gh_A11G2358,Gh_D11G0730,Gh_D06G1345,Gh_A01G0843,Gh_D03G1781,Gh_A12G0331,Gh_D06G0982,Gh_Sca010487G02,Gh_A06G0349,Gh_D05G2734,Gh_D04G0583,Gh_D12G1932,Gh_A07G1608,Gh_D12G2711,Gh_D09G0593,Gh_D02G1649…
GO:0003723	RNA binding	molecular_function	0.028119	0.61332	18	202	2637	48611	Gh_Sca010487G02,Gh_D07G0576,Gh_A12G0777,Gh_D03G1781,Gh_A09G0411,Gh_A11G2358,Gh_A07G1240,Gh_D11G3258,Gh_D06G0902,Gh_D12G2404,Gh_A08G1015,Gh_D12G2711,Gh_D09G0593,Gh_D10G2202,Gh_A11G0922,Gh_D08G0270,Gh_D04G0469,Gh_Sca010487G03
GO:0044700	single organism signaling	biological_process	0.028161	0.61332	20	202	3021	48611	Gh_D10G2261,Gh_D05G2734,Gh_A03G0296,Gh_A12G0777,Gh_D06G1866,Gh_D13G1348,Gh_A09G0411,Gh_A11G2358,Gh_D11G0730,Gh_D02G0146,Gh_D09G0593,Gh_D06G0894,Gh_A05G3831,Gh_D13G1470,Gh_D10G2202,Gh_D06G0759,Gh_D08G0270,Gh_D02G1619,Gh_A07G1965,Gh_A11G3013
GO:0090407	organophosphate biosynthetic process	biological_process	0.028275	0.61332	10	202	1188	48611	Gh_A03G0725,Gh_A01G0843,Gh_D11G0730,Gh_A11G2358,Gh_A06G0349,Gh_D10G2202,Gh_A05G3831,Gh_A11G0922,Gh_A11G3033,Gh_D12G2404
GO:0006470	protein dephosphorylation	biological_process	0.028643	0.61332	2	202	63	48611	Gh_D04G0576,Gh_A11G0922
GO:0045156	electron transporter, transferring electrons within the cyclic electron transport pathway of photosynthesis activity	molecular_function	0.028643	0.61332	2	202	63	48611	Gh_D13G2339,Gh_Sca005787G06
GO:0023052	signaling	biological_process	0.028673	0.61332	20	202	3027	48611	Gh_D02G0146,Gh_D11G0730,Gh_A11G2358,Gh_D13G1348,Gh_A09G0411,Gh_D06G1866,Gh_A12G0777,Gh_D05G2734,Gh_A03G0296,Gh_D10G2261,Gh_D06G0894,Gh_D09G0593,Gh_D02G1619,Gh_D08G0270,Gh_D06G0759,Gh_D10G2202,Gh_D13G1470,Gh_A05G3831,Gh_A11G3013,Gh_A07G1965
GO:1901566	organonitrogen compound biosynthetic process	biological_process	0.028786	0.61332	27	202	4415	48611	Gh_A03G0149,Gh_A05G0700,Gh_D12G2422,Gh_A05G2374,Gh_A03G0725,Gh_A01G1126,Gh_D13G2069,Gh_A11G0922,Gh_D10G2202,Gh_D08G0567,Gh_A05G3831,Gh_D09G0269,Gh_D12G2711,Gh_D11G3196,Gh_A11G3033,Gh_D12G2404,Gh_D03G1781,Gh_A05G0713,Gh_A05G2854,Gh_A01G0843,Gh_D02G0877,Gh_D11G0730,Gh_A11G2238,Gh_A11G2358,Gh_A06G0349,Gh_A01G2111,Gh_D08G1212
GO:0003956	NAD(P)+-protein-arginine ADP-ribosyltransferase activity	molecular_function	0.028846	0.61332	1	202	7	48611	Gh_D05G2242
GO:0043169	cation binding	molecular_function	0.029237	0.61869	44	202	7975	48611	Gh_A05G2494,Gh_A05G2246,Gh_A09G0362,Gh_Sca011694G01,Gh_A09G2247,Gh_A03G0149,Gh_A06G0406,Gh_D10G1008,Gh_D10G0130,Gh_A05G3831,Gh_Sca007622G02,Gh_D13G1470,Gh_D10G2202,Gh_D06G0894,Gh_D09G0593,Gh_D05G2263,Gh_A07G1608,Gh_D02G1649,Gh_D06G0902,Gh_A08G1015,Gh_D05G3040,Gh_D07G1578,Gh_A11G2358,Gh_A09G0411,Gh_A06G0349,Gh_A01G2111,Gh_A11G2663,Gh_A11G3013,Gh_Sca006756G06,Gh_D07G1807,Gh_D03G0729,Gh_D13G1518,Gh_…
GO:0034220	ion transmembrane transport	biological_process	0.029517	0.62166	11	202	1369	48611	Gh_A11G3033,Gh_D12G2404,Gh_A06G0349,Gh_Sca010487G02,Gh_A11G0922,Gh_A05G3831,Gh_A05G0978,Gh_A03G0725,Gh_A01G0843,Gh_A11G2358,Gh_D11G0730
GO:0051234	establishment of localization	biological_process	0.03023	0.6337	45	202	8208	48611	Gh_D09G1825,Gh_D08G0417,Gh_A12G0777,Gh_A06G1258,Gh_A08G0319,Gh_A11G3033,Gh_D01G1124,Gh_D12G2404,Gh_D13G0686,Gh_D05G2242,Gh_A11G0922,Gh_A05G0978,Gh_D04G1994,Gh_D05G0890,Gh_D10G1453,Gh_A05G0700,Gh_D02G1620,Gh_Sca010487G02,Gh_A06G0349,Gh_D05G2734,Gh_D06G0982,Gh_A12G0331,Gh_D03G1781,Gh_D06G1345,Gh_A01G0843,Gh_A11G2358,Gh_D11G0730,Gh_A01G1191,Gh_D02G1649,Gh_D09G0593,Gh_D12G2711,Gh_A07G1608,Gh_D12G1932…
GO:0034061	DNA polymerase activity	molecular_function	0.030465	0.63563	8	202	870	48611	Gh_A08G1015,Gh_D06G0902,Gh_D09G0593,Gh_D10G2202,Gh_D13G1470,Gh_A11G0922,Gh_D08G0270,Gh_A11G2358
GO:0033646	host intracellular part	cellular_component	0.031712	0.65552	4	202	284	48611	Gh_A11G2358,Gh_A12G0777,Gh_A09G2247,Gh_A05G3831
GO:0043656	intracellular region of host	cellular_component	0.031712	0.65552	4	202	284	48611	Gh_A09G2247,Gh_A05G3831,Gh_A12G0777,Gh_A11G2358
GO:0031929	TOR signaling	biological_process	0.032899	0.66595	1	202	8	48611	Gh_D05G2734
GO:0032006	regulation of TOR signaling	biological_process	0.032899	0.66595	1	202	8	48611	Gh_D05G2734
GO:0044763	single-organism cellular process	biological_process	0.032906	0.66595	73	202	14475	48611	Gh_A13G1907,Gh_D12G2422,Gh_A05G0700,Gh_D02G1619,Gh_A08G0871,Gh_A12G1892,Gh_Sca005787G06,Gh_D12G2404,Gh_D13G0686,Gh_D01G1124,Gh_D02G0146,Gh_Sca010487G03,Gh_D13G1464,Gh_A07G1965,Gh_A11G2403,Gh_D01G2275,Gh_A05G0716,Gh_D02G1685,Gh_D10G2202,Gh_A08G1668,Gh_D12G1932,Gh_D12G2711,Gh_D02G1649,Gh_A01G1191,Gh_A11G2358,Gh_D11G0730,Gh_A09G0411,Gh_A01G0843,Gh_A12G0331,Gh_Sca010487G02,Gh_A06G0349,Gh_A03G0296,Gh_…
GO:0009767	photosynthetic electron transport chain	biological_process	0.032962	0.66595	2	202	68	48611	Gh_Sca005787G06,Gh_Sca005362G04
GO:0042393	histone binding	molecular_function	0.032962	0.66595	2	202	68	48611	Gh_D06G0894,Gh_D06G0759
GO:0016779	nucleotidyltransferase activity	molecular_function	0.034676	0.6928	14	202	1948	48611	Gh_A05G2494,Gh_D09G0593,Gh_A08G1015,Gh_D02G2152,Gh_D06G0902,Gh_D01G1124,Gh_A03G0149,Gh_A11G2358,Gh_A05G2854,Gh_D02G1093,Gh_D08G0270,Gh_D13G1470,Gh_A11G0922,Gh_D10G2202
GO:0030955	potassium ion binding	molecular_function	0.034756	0.6928	2	202	70	48611	Gh_A08G0871,Gh_A09G0362
GO:0031420	alkali metal ion binding	molecular_function	0.034756	0.6928	2	202	70	48611	Gh_A09G0362,Gh_A08G0871
GO:0042254	ribosome biogenesis	biological_process	0.034945	0.69346	4	202	293	48611	Gh_A11G2358,Gh_D06G1600,Gh_A09G0411,Gh_D02G2152
GO:0005102	receptor binding	molecular_function	0.036079	0.70066	8	202	900	48611	Gh_A11G3013,Gh_A05G2494,Gh_A11G2358,Gh_D12G1363,Gh_A03G0296,Gh_A11G0922,Gh_D10G2202,Gh_A12G0777
GO:0045893	positive regulation of transcription, DNA-templated	biological_process	0.036752	0.70066	3	202	174	48611	Gh_A12G0777,Gh_A11G3033,Gh_A05G3831
GO:0051254	positive regulation of RNA metabolic process	biological_process	0.036752	0.70066	3	202	174	48611	Gh_A11G3033,Gh_A05G3831,Gh_A12G0777
GO:1902680	positive regulation of RNA biosynthetic process	biological_process	0.036752	0.70066	3	202	174	48611	Gh_A12G0777,Gh_A11G3033,Gh_A05G3831
GO:1903508	positive regulation of nucleic acid-templated transcription	biological_process	0.036752	0.70066	3	202	174	48611	Gh_A12G0777,Gh_A05G3831,Gh_A11G3033
GO:0004715	non-membrane spanning protein tyrosine kinase activity	molecular_function	0.036935	0.70066	1	202	9	48611	Gh_D05G2242
GO:0006535	cysteine biosynthetic process from serine	biological_process	0.036935	0.70066	1	202	9	48611	Gh_D13G2069
GO:0009001	serine O-acetyltransferase activity	molecular_function	0.036935	0.70066	1	202	9	48611	Gh_D13G2069
GO:0016412	serine O-acyltransferase activity	molecular_function	0.036935	0.70066	1	202	9	48611	Gh_D13G2069
GO:0019344	cysteine biosynthetic process	biological_process	0.036935	0.70066	1	202	9	48611	Gh_D13G2069
GO:0043232	intracellular non-membrane-bounded organelle	cellular_component	0.037096	0.70066	19	202	2920	48611	Gh_A01G1126,Gh_A05G2374,Gh_D09G0269,Gh_A05G3831,Gh_D08G0567,Gh_D01G2275,Gh_A03G0149,Gh_A11G2238,Gh_A11G2358,Gh_A05G0713,Gh_D03G1781,Gh_A05G2854,Gh_D02G0877,Gh_D08G1212,Gh_A01G2111,Gh_A12G1892,Gh_D12G2711,Gh_D11G3196,Gh_A11G3033
GO:0006397	mRNA processing	biological_process	0.038362	0.71615	4	202	302	48611	Gh_A06G0349,Gh_D04G0469,Gh_D03G1781,Gh_A05G2854
GO:0016311	dephosphorylation	biological_process	0.038456	0.71615	2	202	74	48611	Gh_A11G0922,Gh_D04G0576
GO:0019028	viral capsid	cellular_component	0.038717	0.71615	8	202	913	48611	Gh_D04G0317,Gh_D02G0503,Gh_D08G2349,Gh_A05G2854,Gh_D01G1124,Gh_A11G0233,Gh_A10G0578,Gh_A07G2043
GO:0004386	helicase activity	molecular_function	0.039351	0.71615	9	202	1085	48611	Gh_A11G2663,Gh_D10G2202,Gh_A11G0922,Gh_Sca010487G02,Gh_D04G0317,Gh_A11G2358,Gh_A07G1240,Gh_Sca010487G03,Gh_Sca004751G01
GO:0098803	respiratory chain complex	cellular_component	0.039403	0.71615	2	202	75	48611	Gh_D02G1538,Gh_D13G2339
GO:0006887	exocytosis	biological_process	0.03944	0.71615	3	202	179	48611	Gh_A11G2358,Gh_D03G1781,Gh_D01G1124
GO:0019068	virion assembly	biological_process	0.03944	0.71615	3	202	179	48611	Gh_A11G2358,Gh_D04G0583,Gh_D02G0503
GO:1901136	carbohydrate derivative catabolic process	biological_process	0.03944	0.71615	3	202	179	48611	Gh_A09G2323,Gh_A11G0922,Gh_A11G3033
GO:0051179	localization	biological_process	0.039549	0.71615	45	202	8358	48611	Gh_A11G3033,Gh_D01G1124,Gh_D12G2404,Gh_D13G0686,Gh_D08G0417,Gh_D09G1825,Gh_A12G0777,Gh_A08G0319,Gh_A06G1258,Gh_D10G1453,Gh_A05G0700,Gh_D02G1620,Gh_D05G2242,Gh_A11G0922,Gh_A05G0978,Gh_D04G1994,Gh_D05G0890,Gh_A01G1191,Gh_D02G1649,Gh_D09G0593,Gh_D12G2711,Gh_A07G1608,Gh_D12G1932,Gh_D04G0583,Gh_A06G0349,Gh_Sca010487G02,Gh_D05G2734,Gh_D06G0982,Gh_A12G0331,Gh_D03G1781,Gh_A01G0843,Gh_D06G1345,Gh_D11G0730…
GO:0044711	single-organism biosynthetic process	biological_process	0.039617	0.71615	24	202	3938	48611	Gh_D08G0270,Gh_D10G0130,Gh_A05G3831,Gh_D10G2202,Gh_D05G1075,Gh_D02G0503,Gh_A11G0922,Gh_D13G2069,Gh_A06G0406,Gh_A03G0725,Gh_A05G0700,Gh_D12G2422,Gh_D06G0041,Gh_A01G0311,Gh_D04G0317,Gh_A06G0349,Gh_A11G2358,Gh_D11G0730,Gh_A01G0843,Gh_D13G0686,Gh_D12G2404,Gh_A11G3033,Gh_A03G2022,Gh_D12G2711
GO:0016032	viral process	biological_process	0.040732	0.71709	12	202	1624	48611	Gh_A04G0970,Gh_Sca004751G01,Gh_A07G2043,Gh_D04G0583,Gh_A05G2494,Gh_A07G1702,Gh_D13G2004,Gh_D08G0417,Gh_D04G0317,Gh_D02G0503,Gh_A11G2358,Gh_A08G0319
GO:0022613	ribonucleoprotein complex biogenesis	biological_process	0.040744	0.71709	4	202	308	48611	Gh_D02G2152,Gh_A11G2358,Gh_D06G1600,Gh_A09G0411
GO:0009976	tocopherol cyclase activity	molecular_function	0.040954	0.71709	1	202	10	48611	Gh_A07G0166
GO:0010383	cell wall polysaccharide metabolic process	biological_process	0.040954	0.71709	1	202	10	48611	Gh_A11G2358
GO:0010410	hemicellulose metabolic process	biological_process	0.040954	0.71709	1	202	10	48611	Gh_A11G2358
GO:0045491	xylan metabolic process	biological_process	0.040954	0.71709	1	202	10	48611	Gh_A11G2358
GO:0045493	xylan catabolic process	biological_process	0.040954	0.71709	1	202	10	48611	Gh_A11G2358
GO:0046559	alpha-glucuronidase activity	molecular_function	0.040954	0.71709	1	202	10	48611	Gh_A11G2358
GO:0033643	host cell part	cellular_component	0.041812	0.72925	5	202	452	48611	Gh_A11G2358,Gh_A05G2494,Gh_A12G0777,Gh_A09G2247,Gh_A05G3831
GO:0045935	positive regulation of nucleobase-containing compound metabolic process	biological_process	0.042794	0.73905	3	202	185	48611	Gh_A12G0777,Gh_A05G3831,Gh_A11G3033
GO:0043228	non-membrane-bounded organelle	cellular_component	0.042902	0.73905	19	202	2971	48611	Gh_D11G3196,Gh_D12G2711,Gh_A12G1892,Gh_A11G3033,Gh_D02G0877,Gh_A05G2854,Gh_D03G1781,Gh_A05G0713,Gh_A11G2238,Gh_A11G2358,Gh_A01G2111,Gh_D08G1212,Gh_D01G2275,Gh_A03G0149,Gh_A05G2374,Gh_A01G1126,Gh_A05G3831,Gh_D08G0567,Gh_D09G0269
GO:0004871	signal transducer activity	molecular_function	0.0431	0.73905	9	202	1104	48611	Gh_A03G0296,Gh_D13G1348,Gh_A09G0411,Gh_A01G0843,Gh_D11G0730,Gh_A08G1015,Gh_A07G1608,Gh_D09G1694,Gh_D05G0815
GO:0019012	virion	cellular_component	0.043263	0.73905	13	202	1824	48611	Gh_D10G2202,Gh_D02G0503,Gh_D04G0317,Gh_D08G2349,Gh_A05G1584,Gh_A05G2854,Gh_A11G2358,Gh_A11G0233,Gh_D01G1124,Gh_A04G0970,Gh_A05G2494,Gh_A07G2043,Gh_A10G0578
GO:0006119	oxidative phosphorylation	biological_process	0.043366	0.73905	3	202	186	48611	Gh_D13G2339,Gh_D02G1538,Gh_D13G1464
GO:0042773	ATP synthesis coupled electron transport	biological_process	0.043366	0.73905	3	202	186	48611	Gh_D13G1464,Gh_D02G1538,Gh_D13G2339
GO:0052126	movement in host environment	biological_process	0.043942	0.7413	3	202	187	48611	Gh_A08G0319,Gh_A05G2494,Gh_D08G0417
GO:0052192	movement in environment of other organism involved in symbiotic interaction	biological_process	0.043942	0.7413	3	202	187	48611	Gh_D08G0417,Gh_A05G2494,Gh_A08G0319
GO:0071704	organic substance metabolic process	biological_process	0.043997	0.7413	109	202	23099	48611	Gh_D01G0370,Gh_A09G2323,Gh_D03G1781,Gh_A05G0713,Gh_A12G1973,Gh_D06G1866,Gh_A05G2854,Gh_A01G0311,Gh_D02G1093,Gh_D13G2339,Gh_A11G2663,Gh_A01G2111,Gh_A03G2022,Gh_D06G0894,Gh_D09G0593,Gh_A01G0842,Gh_A07G1240,Gh_D04G1996,Gh_D04G0576,Gh_A07G1603,Gh_A01G1126,Gh_D13G2069,Gh_A03G0725,Gh_D10G0130,Gh_D09G0269,Gh_A05G1034,Gh_D06G0759,Gh_A05G3831,Gh_D13G1470,Gh_D05G0815,Gh_A10G0578,Gh_A05G2494,Gh_A05G2246,Gh_…
GO:0044403	symbiosis, encompassing mutualism through parasitism	biological_process	0.044521	0.74614	13	202	1832	48611	Gh_A04G0970,Gh_A04G1404,Gh_D13G2004,Gh_A07G1702,Gh_Sca004751G01,Gh_D04G0583,Gh_A07G2043,Gh_A05G2494,Gh_D02G0503,Gh_D04G0317,Gh_D08G0417,Gh_A08G0319,Gh_A11G2358
GO:0003972	RNA ligase (ATP) activity	molecular_function	0.044956	0.74614	1	202	11	48611	Gh_D10G2202
GO:0031360	intrinsic component of thylakoid membrane	cellular_component	0.044956	0.74614	1	202	11	48611	Gh_Sca007622G02
GO:0031361	integral component of thylakoid membrane	cellular_component	0.044956	0.74614	1	202	11	48611	Gh_Sca007622G02
GO:0006402	mRNA catabolic process	biological_process	0.04527	0.74614	2	202	81	48611	Gh_D13G2339,Gh_A11G2663
GO:1901576	organic substance biosynthetic process	biological_process	0.045482	0.74614	65	202	12885	48611	Gh_A08G1015,Gh_D06G0902,Gh_D03G1091,Gh_D12G2711,Gh_A06G0349,Gh_A03G0296,Gh_A09G0411,Gh_A01G0843,Gh_D02G0877,Gh_A11G2358,Gh_D11G0730,Gh_D07G1578,Gh_A03G0149,Gh_D01G2275,Gh_A09G2247,Gh_D10G2202,Gh_D09G0587,Gh_Sca005611G02,Gh_A06G0406,Gh_D01G1124,Gh_Sca006892G01,Gh_D13G0686,Gh_D12G2404,Gh_D11G3196,Gh_D08G1212,Gh_D10G0292,Gh_D03G0729,Gh_D12G2422,Gh_A05G0700,Gh_D02G0790,Gh_A05G2374,Gh_A07G1240,Gh_D09G…
GO:0044419	interspecies interaction between organisms	biological_process	0.046129	0.74614	13	202	1842	48611	Gh_A04G0970,Gh_A04G1404,Gh_D04G0583,Gh_Sca004751G01,Gh_A05G2494,Gh_A07G2043,Gh_D13G2004,Gh_A07G1702,Gh_D08G0417,Gh_D02G0503,Gh_D04G0317,Gh_A11G2358,Gh_A08G0319
GO:0004721	phosphoprotein phosphatase activity	molecular_function	0.046277	0.74614	2	202	82	48611	Gh_A11G0922,Gh_D04G0576
GO:0018995	host	cellular_component	0.046568	0.74614	5	202	466	48611	Gh_A05G2494,Gh_A11G2358,Gh_A12G0777,Gh_A05G3831,Gh_A09G2247
GO:0043657	host cell	cellular_component	0.046568	0.74614	5	202	466	48611	Gh_A05G2494,Gh_A11G2358,Gh_A12G0777,Gh_A09G2247,Gh_A05G3831
GO:0044215	other organism	cellular_component	0.046568	0.74614	5	202	466	48611	Gh_A05G2494,Gh_A11G2358,Gh_A12G0777,Gh_A05G3831,Gh_A09G2247
GO:0044216	other organism cell	cellular_component	0.046568	0.74614	5	202	466	48611	Gh_A09G2247,Gh_A05G3831,Gh_A12G0777,Gh_A05G2494,Gh_A11G2358
GO:0044217	other organism part	cellular_component	0.046568	0.74614	5	202	466	48611	Gh_A11G2358,Gh_A05G2494,Gh_A09G2247,Gh_A05G3831,Gh_A12G0777
GO:0044238	primary metabolic process	biological_process	0.046624	0.74614	105	202	22192	48611	Gh_D09G0587,Gh_A12G1475,Gh_D10G2202,Gh_A06G0406,Gh_D06G1600,Gh_D02G1685,Gh_Sca005611G02,Gh_A09G2247,Gh_D01G2275,Gh_A03G0149,Gh_D04G0469,Gh_D13G1464,Gh_Sca010487G03,Gh_Sca006711G02,Gh_Sca010487G02,Gh_A06G0349,Gh_D12G1363,Gh_A03G0296,Gh_D07G1578,Gh_A11G2358,Gh_D11G0730,Gh_D02G0877,Gh_A01G0843,Gh_A09G0411,Gh_D09G0615,Gh_D06G0902,Gh_A08G1015,Gh_A08G2132,Gh_D12G2711,Gh_D03G1091,Gh_A08G0871,Gh_A05G2374…
GO:0006412	translation	biological_process	0.046934	0.74844	15	202	2225	48611	Gh_D08G1212,Gh_D09G0269,Gh_D08G0567,Gh_A01G2111,Gh_A01G1126,Gh_A11G2358,Gh_A11G2238,Gh_A05G0713,Gh_D03G1781,Gh_A05G2374,Gh_A05G2854,Gh_D02G0877,Gh_A03G0149,Gh_A11G3033,Gh_D11G3196
GO:0004421	hydroxymethylglutaryl-CoA synthase activity	molecular_function	0.048942	0.76408	1	202	12	48611	Gh_A03G2022
GO:0005868	cytoplasmic dynein complex	cellular_component	0.048942	0.76408	1	202	12	48611	Gh_A12G1892
GO:0006542	glutamine biosynthetic process	biological_process	0.048942	0.76408	1	202	12	48611	Gh_A05G0700
GO:0008158	hedgehog receptor activity	molecular_function	0.048942	0.76408	1	202	12	48611	Gh_A01G0843
GO:0008452	RNA ligase activity	molecular_function	0.048942	0.76408	1	202	12	48611	Gh_D10G2202
GO:0008770	[acyl-carrier-protein] phosphodiesterase activity	molecular_function	0.048942	0.76408	1	202	12	48611	Gh_D13G0686
GO:0042775	mitochondrial ATP synthesis coupled electron transport	biological_process	0.049348	0.76773	2	202	85	48611	Gh_D02G1538,Gh_D13G2339
GO:0005741	mitochondrial outer membrane	cellular_component	0.049914	0.77116	3	202	197	48611	Gh_A11G2358,Gh_D12G2711,Gh_A05G0716
GO:0031968	organelle outer membrane	cellular_component	0.049914	0.77116	3	202	197	48611	Gh_D12G2711,Gh_A11G2358,Gh_A05G0716
GO:0010628	positive regulation of gene expression	biological_process	0.051153	0.78758	3	202	199	48611	Gh_A11G3033,Gh_A05G3831,Gh_A12G0777
GO:0000746	conjugation	biological_process	0.051435	0.78788	2	202	87	48611	Gh_D13G0438,Gh_D10G2202
GO:0001076	transcription factor activity, RNA polymerase II transcription factor binding	molecular_function	0.052012	0.78788	4	202	334	48611	Gh_A11G2358,Gh_A11G0922,Gh_D09G0587,Gh_A03G0149
GO:0001104	RNA polymerase II transcription cofactor activity	molecular_function	0.052012	0.78788	4	202	334	48611	Gh_A11G2358,Gh_D09G0587,Gh_A03G0149,Gh_A11G0922
GO:0009891	positive regulation of biosynthetic process	biological_process	0.052408	0.78788	3	202	201	48611	Gh_A11G3033,Gh_A05G3831,Gh_A12G0777
GO:0010557	positive regulation of macromolecule biosynthetic process	biological_process	0.052408	0.78788	3	202	201	48611	Gh_A05G3831,Gh_A11G3033,Gh_A12G0777
GO:0031328	positive regulation of cellular biosynthetic process	biological_process	0.052408	0.78788	3	202	201	48611	Gh_A12G0777,Gh_A05G3831,Gh_A11G3033
GO:0051173	positive regulation of nitrogen compound metabolic process	biological_process	0.052408	0.78788	3	202	201	48611	Gh_A12G0777,Gh_A05G3831,Gh_A11G3033
GO:0001671	ATPase activator activity	molecular_function	0.052911	0.79013	1	202	13	48611	Gh_A07G1608
GO:0010207	photosystem II assembly	biological_process	0.052911	0.79013	1	202	13	48611	Gh_A08G1015
GO:0048278	vesicle docking	biological_process	0.053554	0.79096	2	202	89	48611	Gh_A11G2358,Gh_D03G1781
GO:0007154	cell communication	biological_process	0.054124	0.79096	20	202	3257	48611	Gh_D09G0593,Gh_D06G0894,Gh_A09G0411,Gh_D13G1348,Gh_D06G1866,Gh_D02G0146,Gh_A11G2358,Gh_D11G0730,Gh_A03G0296,Gh_D05G2734,Gh_D10G2261,Gh_A12G0777,Gh_A11G3013,Gh_A07G1965,Gh_D02G1619,Gh_D06G0759,Gh_A05G3831,Gh_D13G1470,Gh_D10G2202,Gh_D08G0270
GO:0006260	DNA replication	biological_process	0.054974	0.79096	12	202	1705	48611	Gh_A07G1240,Gh_D01G2275,Gh_A08G1015,Gh_D06G0902,Gh_D09G0593,Gh_D12G2711,Gh_D10G2202,Gh_D13G1470,Gh_A11G0922,Gh_D04G0317,Gh_D08G0270,Gh_A11G2358
GO:0008033	tRNA processing	biological_process	0.055055	0.79096	5	202	489	48611	Gh_D10G2202,Gh_D09G0615,Gh_A09G0411,Gh_A01G1083,Gh_A11G2358
GO:0006357	regulation of transcription from RNA polymerase II promoter	biological_process	0.055309	0.79096	4	202	341	48611	Gh_A11G2358,Gh_A11G0922,Gh_A03G0149,Gh_D09G0587
GO:0000988	transcription factor activity, protein binding	molecular_function	0.055743	0.79096	6	202	649	48611	Gh_D02G2152,Gh_A11G0922,Gh_D09G0587,Gh_A03G0149,Gh_A11G2358,Gh_D12G2711
GO:0015078	hydrogen ion transmembrane transporter activity	molecular_function	0.056327	0.79096	10	202	1343	48611	Gh_A12G0777,Gh_A06G0349,Gh_A05G3831,Gh_A11G0922,Gh_D11G0730,Gh_A11G2358,Gh_A01G0843,Gh_A03G0725,Gh_D12G2404,Gh_A11G3033
GO:0008168	methyltransferase activity	molecular_function	0.056736	0.79096	9	202	1165	48611	Gh_D13G1470,Gh_A08G1668,Gh_A05G2854,Gh_A09G0411,Gh_D06G1600,Gh_A12G1973,Gh_A11G2358,Gh_D02G2152,Gh_D09G0615
GO:0006006	glucose metabolic process	biological_process	0.056789	0.79096	2	202	92	48611	Gh_A06G0406,Gh_A11G3033
GO:0006401	RNA catabolic process	biological_process	0.056789	0.79096	2	202	92	48611	Gh_D13G2339,Gh_A11G2663
GO:0004152	dihydroorotate dehydrogenase activity	molecular_function	0.056864	0.79096	1	202	14	48611	Gh_D10G2202
GO:0004594	pantothenate kinase activity	molecular_function	0.056864	0.79096	1	202	14	48611	Gh_A05G3831
GO:0006222	UMP biosynthetic process	biological_process	0.056864	0.79096	1	202	14	48611	Gh_D10G2202
GO:0007591	molting cycle, chitin-based cuticle	biological_process	0.056864	0.79096	1	202	14	48611	Gh_A12G0777
GO:0008255	ecdysis-triggering hormone activity	molecular_function	0.056864	0.79096	1	202	14	48611	Gh_A12G0777
GO:0016635	oxidoreductase activity, acting on the CH-CH group of donors, quinone or related compound as acceptor	molecular_function	0.056864	0.79096	1	202	14	48611	Gh_D10G2202
GO:0017069	snRNA binding	molecular_function	0.056864	0.79096	1	202	14	48611	Gh_D10G2202
GO:0018990	ecdysis, chitin-based cuticle	biological_process	0.056864	0.79096	1	202	14	48611	Gh_A12G0777
GO:0022404	molting cycle process	biological_process	0.056864	0.79096	1	202	14	48611	Gh_A12G0777
GO:0042303	molting cycle	biological_process	0.056864	0.79096	1	202	14	48611	Gh_A12G0777
GO:0042720	mitochondrial inner membrane peptidase complex	cellular_component	0.056864	0.79096	1	202	14	48611	Gh_D04G0469
GO:0046049	UMP metabolic process	biological_process	0.056864	0.79096	1	202	14	48611	Gh_D10G2202
GO:0043043	peptide biosynthetic process	biological_process	0.057202	0.79319	15	202	2289	48611	Gh_A11G3033,Gh_A03G0149,Gh_D11G3196,Gh_D09G0269,Gh_D08G1212,Gh_A01G2111,Gh_D08G0567,Gh_A11G2238,Gh_A11G2358,Gh_A01G1126,Gh_A05G2854,Gh_D02G0877,Gh_A05G0713,Gh_D03G1781,Gh_A05G2374
GO:0008173	RNA methyltransferase activity	molecular_function	0.057572	0.79468	3	202	209	48611	Gh_D13G1470,Gh_D09G0615,Gh_A05G2854
GO:0009064	glutamine family amino acid metabolic process	biological_process	0.057882	0.79468	2	202	93	48611	Gh_A05G0700,Gh_D12G2422
GO:0019205	nucleobase-containing compound kinase activity	molecular_function	0.057882	0.79468	2	202	93	48611	Gh_A12G1475,Gh_D13G2004
GO:1901575	organic substance catabolic process	biological_process	0.058021	0.79468	11	202	1534	48611	Gh_A11G0922,Gh_A11G2663,Gh_D13G2339,Gh_A11G2358,Gh_A09G2323,Gh_A08G0871,Gh_A09G0362,Gh_D13G0686,Gh_A11G3033,Gh_A13G1907,Gh_A11G3013
GO:0043167	ion binding	molecular_function	0.058553	0.79776	75	202	15354	48611	Gh_D03G0729,Gh_D12G2422,Gh_D13G1518,Gh_A05G1584,Gh_D08G0085,Gh_A08G0871,Gh_D13G0686,Gh_D12G1468,Gh_A12G1892,Gh_D11G3196,Gh_D05G1158,Gh_D05G2675,Gh_A11G2403,Gh_A09G2247,Gh_A03G0149,Gh_Sca010487G03,Gh_Sca004751G01,Gh_Sca006711G02,Gh_D10G2202,Gh_D09G0587,Gh_A12G1475,Gh_A06G0406,Gh_A08G1015,Gh_D06G0902,Gh_D02G1649,Gh_A08G2132,Gh_A07G1608,Gh_D05G2263,Gh_A03G0296,Gh_Sca010487G02,Gh_A06G0349,Gh_A11G2358…
GO:0004523	RNA-DNA hybrid ribonuclease activity	molecular_function	0.058604	0.79776	5	202	498	48611	Gh_A11G2358,Gh_D05G1158,Gh_A12G0777,Gh_D08G0270,Gh_D10G2202
GO:0040011	locomotion	biological_process	0.059006	0.80079	5	202	499	48611	Gh_A07G1702,Gh_A08G0319,Gh_A05G2494,Gh_A11G2358,Gh_D08G0417
GO:0016592	mediator complex	cellular_component	0.059212	0.80115	4	202	349	48611	Gh_A11G2358,Gh_A03G0149,Gh_D09G0587,Gh_A11G0922
GO:0030286	dynein complex	cellular_component	0.0608	0.81836	1	202	15	48611	Gh_A12G1892
GO:0060089	molecular transducer activity	molecular_function	0.060984	0.81836	9	202	1182	48611	Gh_A09G0411,Gh_D13G1348,Gh_A01G0843,Gh_D11G0730,Gh_A03G0296,Gh_A07G1608,Gh_D09G1694,Gh_D05G0815,Gh_A08G1015
GO:0044249	cellular biosynthetic process	biological_process	0.061034	0.81836	63	202	12644	48611	Gh_A01G0843,Gh_D02G0877,Gh_A09G0411,Gh_A05G2854,Gh_A05G0713,Gh_D03G1781,Gh_A12G1973,Gh_A11G2358,Gh_D11G0730,Gh_D07G1578,Gh_A01G2111,Gh_A06G0349,Gh_A03G0296,Gh_D02G1093,Gh_A01G0311,Gh_D03G1091,Gh_D09G0593,Gh_D12G2711,Gh_D06G0894,Gh_A03G2022,Gh_A07G1240,Gh_A08G1015,Gh_D06G0902,Gh_A03G0725,Gh_Sca005611G02,Gh_D13G2069,Gh_A01G1126,Gh_A05G3831,Gh_D13G1470,Gh_D10G2202,Gh_D06G0759,Gh_D09G0587,Gh_D09G0269…
GO:0008757	S-adenosylmethionine-dependent methyltransferase activity	molecular_function	0.062233	0.83194	4	202	355	48611	Gh_D09G0615,Gh_A05G2854,Gh_A12G1973,Gh_A11G2358
GO:0034645	cellular macromolecule biosynthetic process	biological_process	0.062592	0.83279	52	202	10188	48611	Gh_D02G0790,Gh_D03G0729,Gh_D10G0292,Gh_A05G2374,Gh_D08G0270,Gh_D05G2242,Gh_A11G0922,Gh_D08G0567,Gh_D02G0503,Gh_D11G3196,Gh_A07G0876,Gh_A11G3033,Gh_D01G1124,Gh_Sca006892G01,Gh_A11G2238,Gh_A06G0222,Gh_A12G0777,Gh_D08G1212,Gh_D04G0317,Gh_A08G1584,Gh_D02G2152,Gh_D01G2275,Gh_A03G0149,Gh_A09G2247,Gh_A01G1126,Gh_Sca005611G02,Gh_D09G0269,Gh_D10G0130,Gh_D06G0759,Gh_D09G0587,Gh_D13G1470,Gh_A05G3831,Gh_D10G…
GO:0090304	nucleic acid metabolic process	biological_process	0.063423	0.83279	54	202	10644	48611	Gh_D02G0790,Gh_D10G0292,Gh_A04G0970,Gh_D03G0729,Gh_A11G0922,Gh_D08G0270,Gh_D05G1158,Gh_A07G0876,Gh_D12G1468,Gh_A11G3033,Gh_D01G1124,Gh_Sca006892G01,Gh_D13G0686,Gh_A06G0222,Gh_A01G1083,Gh_D04G0317,Gh_A12G0777,Gh_A08G1584,Gh_A10G0578,Gh_A05G2494,Gh_D01G2275,Gh_A09G2247,Gh_A03G0149,Gh_D04G0469,Gh_D02G2152,Gh_D06G1600,Gh_D02G1685,Gh_Sca005611G02,Gh_D06G0759,Gh_D09G0587,Gh_D13G1470,Gh_D10G2202,Gh_A05G…
GO:0008026	ATP-dependent helicase activity	molecular_function	0.064291	0.83279	4	202	359	48611	Gh_D04G0317,Gh_A07G1240,Gh_D10G2202,Gh_Sca004751G01
GO:0070035	purine NTP-dependent helicase activity	molecular_function	0.064291	0.83279	4	202	359	48611	Gh_Sca004751G01,Gh_A07G1240,Gh_D04G0317,Gh_D10G2202
GO:0006534	cysteine metabolic process	biological_process	0.06472	0.83279	1	202	16	48611	Gh_D13G2069
GO:0007622	rhythmic behavior	biological_process	0.06472	0.83279	1	202	16	48611	Gh_D11G0730
GO:0008218	bioluminescence	biological_process	0.06472	0.83279	1	202	16	48611	Gh_A01G0842
GO:0009007	site-specific DNA-methyltransferase (adenine-specific) activity	molecular_function	0.06472	0.83279	1	202	16	48611	Gh_A11G2358
GO:0009008	DNA-methyltransferase activity	molecular_function	0.06472	0.83279	1	202	16	48611	Gh_A11G2358
GO:0016499	orexin receptor activity	molecular_function	0.06472	0.83279	1	202	16	48611	Gh_D11G0730
GO:0022410	circadian sleep/wake cycle process	biological_process	0.06472	0.83279	1	202	16	48611	Gh_D11G0730
GO:0042745	circadian sleep/wake cycle	biological_process	0.06472	0.83279	1	202	16	48611	Gh_D11G0730
GO:0048512	circadian behavior	biological_process	0.06472	0.83279	1	202	16	48611	Gh_D11G0730
GO:0019058	viral life cycle	biological_process	0.066813	0.85568	7	202	850	48611	Gh_D02G0503,Gh_D04G0317,Gh_D13G2004,Gh_Sca004751G01,Gh_A07G2043,Gh_D04G0583,Gh_A11G2358
GO:0051087	chaperone binding	molecular_function	0.066883	0.85568	2	202	101	48611	Gh_A07G1608,Gh_D05G2242
GO:0009070	serine family amino acid biosynthetic process	biological_process	0.068624	0.87545	1	202	17	48611	Gh_D13G2069
GO:0005576	extracellular region	cellular_component	0.069904	0.88923	15	202	2358	48611	Gh_D10G1453,Gh_A04G1404,Gh_A07G1608,Gh_A11G3013,Gh_A05G2494,Gh_A11G0922,Gh_D10G2202,Gh_A03G0296,Gh_D12G1363,Gh_A05G0978,Gh_D10G1008,Gh_D08G0270,Gh_D02G0877,Gh_A11G2358,Gh_A07G1603
GO:0043603	cellular amide metabolic process	biological_process	0.0707	0.89495	16	202	2560	48611	Gh_A03G0149,Gh_A01G1126,Gh_A05G2374,Gh_D09G0269,Gh_A11G0922,Gh_D08G0567,Gh_D11G3196,Gh_A11G3033,Gh_A11G2238,Gh_A11G2358,Gh_A05G2854,Gh_D02G0877,Gh_A05G0713,Gh_D03G1781,Gh_D08G1212,Gh_A01G2111
GO:0022904	respiratory electron transport chain	biological_process	0.070754	0.89495	3	202	228	48611	Gh_D13G1464,Gh_D02G1538,Gh_D13G2339
GO:0036094	small molecule binding	molecular_function	0.071718	0.90458	46	202	8947	48611	Gh_Sca004751G01,Gh_Sca010487G03,Gh_A05G2494,Gh_Sca006711G02,Gh_A08G1584,Gh_A09G0362,Gh_A11G2403,Gh_A07G1603,Gh_D10G0130,Gh_A05G3831,Gh_D13G1470,Gh_D10G2202,Gh_A05G1034,Gh_D09G0587,Gh_A12G1475,Gh_D04G0583,Gh_A08G2132,Gh_A01G0842,Gh_A07G1240,Gh_D01G0370,Gh_A11G2358,Gh_D05G0636,Gh_A05G2854,Gh_A12G0816,Gh_A11G2663,Gh_A01G2111,Gh_Sca010487G02,Gh_A03G0296,Gh_D12G2422,Gh_D05G3936,Gh_A05G0978,Gh_D08G0270…
GO:0019074	viral RNA genome packaging	biological_process	0.072512	0.91201	1	202	18	48611	Gh_D02G0503
GO:0007186	G-protein coupled receptor signaling pathway	biological_process	0.073165	0.91765	5	202	532	48611	Gh_A11G2358,Gh_D11G0730,Gh_D13G1348,Gh_A12G0777,Gh_A05G3831
GO:0043604	amide biosynthetic process	biological_process	0.073913	0.91927	15	202	2378	48611	Gh_A05G2854,Gh_D02G0877,Gh_A05G0713,Gh_D03G1781,Gh_A05G2374,Gh_A11G2238,Gh_A11G2358,Gh_A01G1126,Gh_D08G0567,Gh_A01G2111,Gh_D09G0269,Gh_D08G1212,Gh_D11G3196,Gh_A03G0149,Gh_A11G3033
GO:0022406	membrane docking	biological_process	0.073917	0.91927	2	202	107	48611	Gh_D03G1781,Gh_A11G2358
GO:0016310	phosphorylation	biological_process	0.074592	0.91927	21	202	3595	48611	Gh_A05G2494,Gh_D13G1464,Gh_Sca006711G02,Gh_A09G0362,Gh_A08G0871,Gh_D10G0130,Gh_A11G0922,Gh_D02G0503,Gh_D05G2242,Gh_D09G0587,Gh_A12G1475,Gh_A05G1034,Gh_D02G1538,Gh_A08G2132,Gh_A01G0842,Gh_D13G0686,Gh_A06G1129,Gh_D01G0370,Gh_D06G1866,Gh_D13G2339,Gh_A03G0296
GO:0006518	peptide metabolic process	biological_process	0.075144	0.91927	15	202	2384	48611	Gh_D11G3196,Gh_A03G0149,Gh_A11G3033,Gh_A11G2358,Gh_A11G2238,Gh_A01G1126,Gh_A05G2854,Gh_D02G0877,Gh_A05G0713,Gh_D03G1781,Gh_A05G2374,Gh_D09G0269,Gh_D08G1212,Gh_D08G0567,Gh_A01G2111
GO:0038023	signaling receptor activity	molecular_function	0.075474	0.91927	6	202	703	48611	Gh_D11G0730,Gh_D05G0815,Gh_D09G1694,Gh_D13G1348,Gh_A01G0843,Gh_A07G1608
GO:0009059	macromolecule biosynthetic process	biological_process	0.075814	0.91927	52	202	10323	48611	Gh_D09G0593,Gh_D12G2711,Gh_D03G1091,Gh_D06G0894,Gh_A07G1240,Gh_D06G0902,Gh_A08G1015,Gh_D03G1781,Gh_A12G1973,Gh_A05G0713,Gh_D02G0877,Gh_A09G0411,Gh_A05G2854,Gh_D07G1578,Gh_A11G2358,Gh_A03G0296,Gh_A01G2111,Gh_A01G0311,Gh_D02G1093,Gh_A08G1584,Gh_A09G2247,Gh_D01G2275,Gh_A03G0149,Gh_D02G2152,Gh_Sca005611G02,Gh_A01G1126,Gh_D09G0587,Gh_D06G0759,Gh_D13G1470,Gh_A05G3831,Gh_D10G2202,Gh_D10G0130,Gh_D09G0269…
GO:0004748	ribonucleoside-diphosphate reductase activity, thioredoxin disulfide as acceptor	molecular_function	0.076383	0.91927	1	202	19	48611	Gh_D09G0593
GO:0008527	taste receptor activity	molecular_function	0.076383	0.91927	1	202	19	48611	Gh_D05G0815
GO:0009593	detection of chemical stimulus	biological_process	0.076383	0.91927	1	202	19	48611	Gh_D05G0815
GO:0015930	glutamate synthase activity	molecular_function	0.076383	0.91927	1	202	19	48611	Gh_D12G2422
GO:0016728	oxidoreductase activity, acting on CH or CH2 groups, disulfide as acceptor	molecular_function	0.076383	0.91927	1	202	19	48611	Gh_D09G0593
GO:0050906	detection of stimulus involved in sensory perception	biological_process	0.076383	0.91927	1	202	19	48611	Gh_D05G0815
GO:0050907	detection of chemical stimulus involved in sensory perception	biological_process	0.076383	0.91927	1	202	19	48611	Gh_D05G0815
GO:0050912	detection of chemical stimulus involved in sensory perception of taste	biological_process	0.076383	0.91927	1	202	19	48611	Gh_D05G0815
GO:0061731	ribonucleoside-diphosphate reductase activity	molecular_function	0.076383	0.91927	1	202	19	48611	Gh_D09G0593
GO:0010604	positive regulation of macromolecule metabolic process	biological_process	0.076676	0.92032	3	202	236	48611	Gh_A12G0777,Gh_A05G3831,Gh_A11G3033
GO:0016070	RNA metabolic process	biological_process	0.078101	0.93491	40	202	7680	48611	Gh_A12G0777,Gh_A06G0222,Gh_A01G1083,Gh_A11G3033,Gh_D01G1124,Gh_Sca006892G01,Gh_A07G0876,Gh_A11G0922,Gh_A04G0970,Gh_D03G0729,Gh_D10G0292,Gh_D02G0790,Gh_D02G1093,Gh_D13G2339,Gh_A03G0296,Gh_A06G0349,Gh_A11G2663,Gh_D07G1578,Gh_A11G2358,Gh_D03G1781,Gh_A12G1973,Gh_D02G0877,Gh_A09G0411,Gh_A05G2854,Gh_D09G0615,Gh_D06G0894,Gh_D12G2711,Gh_D03G1091,Gh_D09G0587,Gh_D06G0759,Gh_D13G1470,Gh_D10G2202,Gh_A05G3831…
GO:1902495	transmembrane transporter complex	cellular_component	0.078733	0.935	2	202	111	48611	Gh_D13G2339,Gh_D02G1538
GO:1990351	transporter complex	cellular_component	0.078733	0.935	2	202	111	48611	Gh_D13G2339,Gh_D02G1538
GO:0016891	endoribonuclease activity, producing 5'-phosphomonoesters	molecular_function	0.078736	0.935	5	202	544	48611	Gh_D10G2202,Gh_A12G0777,Gh_D08G0270,Gh_D05G1158,Gh_A11G2358
GO:0016741	transferase activity, transferring one-carbon groups	molecular_function	0.079376	0.93943	9	202	1248	48611	Gh_D13G1470,Gh_A08G1668,Gh_A05G2854,Gh_A09G0411,Gh_D06G1600,Gh_A12G1973,Gh_A11G2358,Gh_D09G0615,Gh_D02G2152
GO:0019953	sexual reproduction	biological_process	0.079717	0.93943	3	202	240	48611	Gh_D12G1363,Gh_A11G2358,Gh_A05G2494
GO:0006869	lipid transport	biological_process	0.079952	0.93943	2	202	112	48611	Gh_D10G1453,Gh_D12G1932
GO:0010876	lipid localization	biological_process	0.079952	0.93943	2	202	112	48611	Gh_D12G1932,Gh_D10G1453
GO:0005215	transporter activity	molecular_function	0.081591	0.95618	26	202	4683	48611	Gh_A07G1608,Gh_D12G1932,Gh_D04G0583,Gh_A11G3033,Gh_A01G1191,Gh_D13G0686,Gh_D02G1649,Gh_D12G2404,Gh_A01G0843,Gh_A11G2358,Gh_D11G0730,Gh_Sca010487G02,Gh_A06G0349,Gh_D06G0982,Gh_A12G0777,Gh_D07G1209,Gh_A05G2494,Gh_D02G1620,Gh_D02G1685,Gh_A03G0725,Gh_D05G0890,Gh_D05G2242,Gh_D10G2202,Gh_A11G0922,Gh_A05G3831,Gh_A05G0978
GO:0009539	photosystem II reaction center	cellular_component	0.082809	0.96791	3	202	244	48611	Gh_Sca007622G02,Gh_A12G0777,Gh_D06G0894
GO:0008484	sulfuric ester hydrolase activity	molecular_function	0.084078	0.97762	1	202	21	48611	Gh_D07G0510
GO:0050897	cobalt ion binding	molecular_function	0.084078	0.97762	1	202	21	48611	Gh_D09G0593
GO:0030154	cell differentiation	biological_process	0.085952	0.99682	3	202	248	48611	Gh_A11G0922,Gh_D04G0583,Gh_A11G2358
GO:0005126	cytokine receptor binding	molecular_function	0.087386	1	2	202	118	48611	Gh_A11G0922,Gh_D10G2202
GO:0051701	interaction with host	biological_process	0.087509	1	5	202	562	48611	Gh_A08G0319,Gh_A07G1702,Gh_A05G2494,Gh_A04G1404,Gh_D08G0417
GO:0006471	protein ADP-ribosylation	biological_process	0.087901	1	1	202	22	48611	Gh_D05G2242
GO:0017089	glycolipid transporter activity	molecular_function	0.087901	1	1	202	22	48611	Gh_D12G1932
GO:0046836	glycolipid transport	biological_process	0.087901	1	1	202	22	48611	Gh_D12G1932
GO:0051861	glycolipid binding	molecular_function	0.087901	1	1	202	22	48611	Gh_D12G1932
GO:0010467	gene expression	biological_process	0.089494	1	47	202	9324	48611	Gh_D02G2152,Gh_A09G2247,Gh_A03G0149,Gh_D04G0469,Gh_A08G1584,Gh_D09G0269,Gh_D09G0587,Gh_D06G0759,Gh_D13G1470,Gh_A05G3831,Gh_D10G2202,Gh_A01G1126,Gh_D06G1600,Gh_Sca005611G02,Gh_D09G0615,Gh_D06G0894,Gh_D12G2711,Gh_D03G1091,Gh_D02G1093,Gh_A03G0296,Gh_A06G0349,Gh_A01G2111,Gh_D07G1578,Gh_A11G2358,Gh_A12G1973,Gh_D03G1781,Gh_A05G0713,Gh_A09G0411,Gh_D02G0877,Gh_A05G2854,Gh_D03G0729,Gh_D10G0292,Gh_D02G0790…
GO:0009058	biosynthetic process	biological_process	0.089545	1	65	202	13400	48611	Gh_A11G3033,Gh_A07G0876,Gh_D04G0317,Gh_A12G0777,Gh_A06G0222,Gh_A11G2238,Gh_D05G1075,Gh_D08G0567,Gh_A11G0922,Gh_D02G0503,Gh_D05G2242,Gh_D08G0270,Gh_A07G1240,Gh_D09G0593,Gh_A03G2022,Gh_D06G0894,Gh_A01G2111,Gh_A01G0311,Gh_D02G1093,Gh_A05G2854,Gh_A12G1973,Gh_D03G1781,Gh_A05G0713,Gh_D06G0041,Gh_D02G2152,Gh_A08G1584,Gh_D13G1470,Gh_A05G3831,Gh_D06G0759,Gh_D10G0130,Gh_D09G0269,Gh_A03G0725,Gh_D13G2069,Gh_…
GO:0046914	transition metal ion binding	molecular_function	0.089804	1	30	202	5590	48611	Gh_A07G1608,Gh_D05G1158,Gh_D09G0593,Gh_A12G1892,Gh_D12G1468,Gh_D06G0894,Gh_A08G1015,Gh_D05G3040,Gh_D06G0902,Gh_D13G0686,Gh_A11G2358,Gh_D07G1578,Gh_A11G2663,Gh_D07G0576,Gh_A11G3013,Gh_A05G2494,Gh_A05G2246,Gh_D13G1518,Gh_D03G0729,Gh_A09G0362,Gh_A06G0406,Gh_D08G0085,Gh_D10G2202,Gh_Sca007622G02,Gh_D13G1470,Gh_A11G0922,Gh_A05G3831,Gh_A05G1584,Gh_D10G1008,Gh_D08G0270
GO:1902531	regulation of intracellular signal transduction	biological_process	0.089909	1	2	202	120	48611	Gh_D05G2734,Gh_D06G1866
GO:0031981	nuclear lumen	cellular_component	0.090959	1	7	202	917	48611	Gh_A05G3831,Gh_A11G0922,Gh_D09G0587,Gh_D01G2275,Gh_A03G0149,Gh_A07G0876,Gh_A11G2358
GO:0004379	glycylpeptide N-tetradecanoyltransferase activity	molecular_function	0.091708	1	1	202	23	48611	Gh_D06G0902
GO:0007217	tachykinin receptor signaling pathway	biological_process	0.091708	1	1	202	23	48611	Gh_A05G3831
GO:0019107	myristoyltransferase activity	molecular_function	0.091708	1	1	202	23	48611	Gh_D06G0902
GO:0019904	protein domain specific binding	molecular_function	0.091708	1	1	202	23	48611	Gh_A07G0938
GO:0004519	endonuclease activity	molecular_function	0.091747	1	7	202	919	48611	Gh_D10G2202,Gh_D01G2275,Gh_D04G0317,Gh_A12G0777,Gh_D08G0270,Gh_D05G1158,Gh_A11G2358
GO:0006848	pyruvate transport	biological_process	0.0955	1	1	202	24	48611	Gh_D13G0686
GO:0006850	mitochondrial pyruvate transport	biological_process	0.0955	1	1	202	24	48611	Gh_D13G0686
GO:0009772	photosynthetic electron transport in photosystem II	biological_process	0.0955	1	1	202	24	48611	Gh_Sca005787G06
GO:0005085	guanyl-nucleotide exchange factor activity	molecular_function	0.097604	1	2	202	126	48611	Gh_A03G0296,Gh_A11G2358
GO:0044765	single-organism transport	biological_process	0.097684	1	31	202	5856	48611	Gh_D13G0686,Gh_D12G2404,Gh_A01G1191,Gh_A11G3033,Gh_D01G1124,Gh_D12G1932,Gh_D04G0583,Gh_A12G0331,Gh_D09G1825,Gh_A12G0777,Gh_Sca010487G02,Gh_A06G0349,Gh_D11G0730,Gh_A11G2358,Gh_A06G1258,Gh_D03G1781,Gh_A01G0843,Gh_D02G1620,Gh_D10G1453,Gh_D07G1209,Gh_Sca010487G03,Gh_A05G0978,Gh_D09G0587,Gh_A08G1668,Gh_A11G0922,Gh_D08G1251,Gh_A05G3831,Gh_D05G0890,Gh_D02G1685,Gh_D04G1994,Gh_A03G0725
GO:0016052	carbohydrate catabolic process	biological_process	0.098179	1	3	202	263	48611	Gh_A09G0362,Gh_A08G0871,Gh_A11G2358
GO:0044270	cellular nitrogen compound catabolic process	biological_process	0.098179	1	3	202	263	48611	Gh_D13G2339,Gh_A11G2663,Gh_A13G1907
GO:0000166	nucleotide binding	molecular_function	0.09827	1	44	202	8722	48611	Gh_D05G3936,Gh_D12G2422,Gh_D05G1075,Gh_A11G0922,Gh_D02G0503,Gh_D05G2242,Gh_A05G0978,Gh_D13G2004,Gh_D11G3196,Gh_A06G1129,Gh_A11G3033,Gh_D13G0686,Gh_D04G0317,Gh_A08G0670,Gh_Sca006566G05,Gh_D07G0576,Gh_A12G0777,Gh_Sca006711G02,Gh_A08G1584,Gh_A05G2494,Gh_Sca010487G03,Gh_Sca004751G01,Gh_A11G2403,Gh_A07G1603,Gh_A05G3831,Gh_D13G1470,Gh_D10G2202,Gh_D09G0587,Gh_A12G1475,Gh_A05G1034,Gh_D10G0130,Gh_A01G0842…
GO:1901265	nucleoside phosphate binding	molecular_function	0.09827	1	44	202	8722	48611	Gh_D05G2242,Gh_A11G0922,Gh_D05G1075,Gh_D02G0503,Gh_A05G0978,Gh_D05G3936,Gh_D12G2422,Gh_D04G0317,Gh_A12G0777,Gh_Sca006566G05,Gh_D07G0576,Gh_A08G0670,Gh_A11G3033,Gh_A06G1129,Gh_D13G0686,Gh_D13G2004,Gh_D11G3196,Gh_D09G0587,Gh_A12G1475,Gh_A05G1034,Gh_A05G3831,Gh_D13G1470,Gh_D10G2202,Gh_D10G0130,Gh_A07G1603,Gh_A11G2403,Gh_Sca006711G02,Gh_A08G1584,Gh_Sca010487G03,Gh_Sca004751G01,Gh_A05G2494,Gh_A03G0296…
GO:1901505	carbohydrate derivative transporter activity	molecular_function	0.098904	1	2	202	127	48611	Gh_A05G2494,Gh_D12G1932
GO:0004484	mRNA guanylyltransferase activity	molecular_function	0.099276	1	1	202	25	48611	Gh_A05G2854
GO:0006537	glutamate biosynthetic process	biological_process	0.099276	1	1	202	25	48611	Gh_D12G2422
GO:0016725	oxidoreductase activity, acting on CH or CH2 groups	molecular_function	0.099276	1	1	202	25	48611	Gh_D09G0593
GO:0019722	calcium-mediated signaling	biological_process	0.099276	1	1	202	25	48611	Gh_D02G0146
GO:0019932	second-messenger-mediated signaling	biological_process	0.099276	1	1	202	25	48611	Gh_D02G0146
GO:0043650	dicarboxylic acid biosynthetic process	biological_process	0.099276	1	1	202	25	48611	Gh_D12G2422
GO:0006720	isoprenoid metabolic process	biological_process	0.10071	1	3	202	266	48611	Gh_A03G2022,Gh_D08G0270,Gh_D05G1075
GO:0008299	isoprenoid biosynthetic process	biological_process	0.10071	1	3	202	266	48611	Gh_D08G0270,Gh_D05G1075,Gh_A03G2022
GO:0046700	heterocycle catabolic process	biological_process	0.1024	1	3	202	268	48611	Gh_D13G2339,Gh_A11G2663,Gh_A13G1907
GO:0061025	membrane fusion	biological_process	0.10283	1	2	202	130	48611	Gh_A11G2358,Gh_A05G0716
GO:0004602	glutathione peroxidase activity	molecular_function	0.10304	1	1	202	26	48611	Gh_A05G2374
GO:0003712	transcription cofactor activity	molecular_function	0.10386	1	4	202	426	48611	Gh_A11G0922,Gh_D09G0587,Gh_A03G0149,Gh_A11G2358
GO:0004521	endoribonuclease activity	molecular_function	0.1054	1	5	202	596	48611	Gh_D05G1158,Gh_A11G2358,Gh_D10G2202,Gh_D08G0270,Gh_A12G0777
GO:0051716	cellular response to stimulus	biological_process	0.10651	1	23	202	4187	48611	Gh_A11G3013,Gh_D01G2275,Gh_A07G1965,Gh_D02G1619,Gh_D13G1470,Gh_D10G2202,Gh_A05G3831,Gh_D06G0759,Gh_D08G0270,Gh_D09G0593,Gh_D06G0894,Gh_A07G1240,Gh_D13G0686,Gh_D13G1348,Gh_D06G1866,Gh_A09G0411,Gh_A11G2358,Gh_D11G0730,Gh_D02G0146,Gh_D10G2261,Gh_A03G0296,Gh_D05G2734,Gh_A12G0777
GO:0004482	mRNA (guanine-N7-)-methyltransferase activity	molecular_function	0.10678	1	1	202	27	48611	Gh_A05G2854
GO:0009173	pyrimidine ribonucleoside monophosphate metabolic process	biological_process	0.10678	1	1	202	27	48611	Gh_D10G2202
GO:0009174	pyrimidine ribonucleoside monophosphate biosynthetic process	biological_process	0.10678	1	1	202	27	48611	Gh_D10G2202
GO:0017056	structural constituent of nuclear pore	molecular_function	0.10678	1	1	202	27	48611	Gh_A05G3831
GO:0017108	5'-flap endonuclease activity	molecular_function	0.10678	1	1	202	27	48611	Gh_D01G2275
GO:0033557	Slx1-Slx4 complex	cellular_component	0.10678	1	1	202	27	48611	Gh_D01G2275
GO:0046132	pyrimidine ribonucleoside biosynthetic process	biological_process	0.10678	1	1	202	27	48611	Gh_D10G2202
GO:0046134	pyrimidine nucleoside biosynthetic process	biological_process	0.10678	1	1	202	27	48611	Gh_D10G2202
GO:0048256	flap endonuclease activity	molecular_function	0.10678	1	1	202	27	48611	Gh_D01G2275
GO:0070069	cytochrome complex	cellular_component	0.10681	1	2	202	133	48611	Gh_D02G1538,Gh_D13G2339
GO:0000989	transcription factor activity, transcription factor binding	molecular_function	0.10718	1	4	202	431	48611	Gh_A11G0922,Gh_A03G0149,Gh_D09G0587,Gh_A11G2358
GO:0005654	nucleoplasm	cellular_component	0.10818	1	5	202	601	48611	Gh_A07G0876,Gh_A11G2358,Gh_D09G0587,Gh_A03G0149,Gh_A11G0922
GO:0044451	nucleoplasm part	cellular_component	0.10818	1	5	202	601	48611	Gh_A11G2358,Gh_A07G0876,Gh_A03G0149,Gh_D09G0587,Gh_A11G0922
GO:0004872	receptor activity	molecular_function	0.11012	1	6	202	781	48611	Gh_D13G1348,Gh_A07G1608,Gh_A01G0843,Gh_D11G0730,Gh_D09G1694,Gh_D05G0815
GO:0004336	galactosylceramidase activity	molecular_function	0.11051	1	1	202	28	48611	Gh_A11G0922
GO:0006677	glycosylceramide metabolic process	biological_process	0.11051	1	1	202	28	48611	Gh_A11G0922
GO:0006681	galactosylceramide metabolic process	biological_process	0.11051	1	1	202	28	48611	Gh_A11G0922
GO:0006683	galactosylceramide catabolic process	biological_process	0.11051	1	1	202	28	48611	Gh_A11G0922
GO:0006687	glycosphingolipid metabolic process	biological_process	0.11051	1	1	202	28	48611	Gh_A11G0922
GO:0007631	feeding behavior	biological_process	0.11051	1	1	202	28	48611	Gh_D11G0730
GO:0019374	galactolipid metabolic process	biological_process	0.11051	1	1	202	28	48611	Gh_A11G0922
GO:0019376	galactolipid catabolic process	biological_process	0.11051	1	1	202	28	48611	Gh_A11G0922
GO:0019377	glycolipid catabolic process	biological_process	0.11051	1	1	202	28	48611	Gh_A11G0922
GO:0030149	sphingolipid catabolic process	biological_process	0.11051	1	1	202	28	48611	Gh_A11G0922
GO:0046466	membrane lipid catabolic process	biological_process	0.11051	1	1	202	28	48611	Gh_A11G0922
GO:0046477	glycosylceramide catabolic process	biological_process	0.11051	1	1	202	28	48611	Gh_A11G0922
GO:0046479	glycosphingolipid catabolic process	biological_process	0.11051	1	1	202	28	48611	Gh_A11G0922
GO:0046514	ceramide catabolic process	biological_process	0.11051	1	1	202	28	48611	Gh_A11G0922
GO:0043233	organelle lumen	cellular_component	0.11092	1	7	202	965	48611	Gh_A03G0149,Gh_D09G0587,Gh_D01G2275,Gh_A11G0922,Gh_A05G3831,Gh_A07G0876,Gh_A11G2358
GO:0070013	intracellular organelle lumen	cellular_component	0.11092	1	7	202	965	48611	Gh_A07G0876,Gh_A11G2358,Gh_A11G0922,Gh_A05G3831,Gh_D09G0587,Gh_A03G0149,Gh_D01G2275
GO:0035556	intracellular signal transduction	biological_process	0.11158	1	9	202	1344	48611	Gh_D06G0894,Gh_A07G1965,Gh_A11G2358,Gh_D02G0146,Gh_D06G1866,Gh_D08G0270,Gh_D13G1470,Gh_D06G0759,Gh_D05G2734
GO:0005622	intracellular	cellular_component	0.1123	1	64	202	13364	48611	Gh_Sca007035G04,Gh_D04G0469,Gh_A05G0716,Gh_A03G0149,Gh_D01G2275,Gh_Sca006711G02,Gh_D09G0587,Gh_A08G1015,Gh_D12G1932,Gh_D03G1091,Gh_A07G1608,Gh_D12G2711,Gh_A06G0349,Gh_A11G2358,Gh_D11G0730,Gh_D07G1578,Gh_A01G0843,Gh_D02G0877,Gh_A12G0816,Gh_Sca006756G05,Gh_D10G0292,Gh_A05G2374,Gh_D12G2404,Gh_D13G0686,Gh_D01G1124,Gh_A12G1892,Gh_D11G3196,Gh_D05G1158,Gh_D08G1212,Gh_D02G2152,Gh_A08G1584,Gh_D09G0269,Gh_…
GO:0009055	electron carrier activity	molecular_function	0.11258	1	6	202	786	48611	Gh_D13G2339,Gh_D10G1453,Gh_Sca007622G02,Gh_A12G0777,Gh_Sca005787G06,Gh_D08G1218
GO:0016772	transferase activity, transferring phosphorus-containing groups	molecular_function	0.11329	1	33	202	6386	48611	Gh_D13G0686,Gh_A06G1129,Gh_D01G1124,Gh_D13G2004,Gh_D08G0270,Gh_D05G2242,Gh_A11G0922,Gh_D02G0503,Gh_A08G0871,Gh_D06G0902,Gh_A08G1015,Gh_A08G2132,Gh_D04G0583,Gh_A01G0842,Gh_D09G0593,Gh_D02G1093,Gh_A03G0296,Gh_D01G0370,Gh_A11G2358,Gh_D06G1866,Gh_A05G2854,Gh_D02G2152,Gh_A09G0362,Gh_A03G0149,Gh_A05G2494,Gh_Sca006711G02,Gh_D10G0130,Gh_D09G0587,Gh_A12G1475,Gh_A05G1034,Gh_D13G1470,Gh_D10G2202,Gh_A05G3831
GO:0006184	obsolete GTP catabolic process	biological_process	0.11351	1	2	202	138	48611	Gh_A05G0716,Gh_A11G2358
GO:0044036	cell wall macromolecule metabolic process	biological_process	0.11351	1	2	202	138	48611	Gh_A11G2358,Gh_A09G2323
GO:1901361	organic cyclic compound catabolic process	biological_process	0.11372	1	3	202	281	48611	Gh_A13G1907,Gh_D13G2339,Gh_A11G2663
GO:0004713	protein tyrosine kinase activity	molecular_function	0.11422	1	1	202	29	48611	Gh_D05G2242
GO:0008535	respiratory chain complex IV assembly	biological_process	0.11422	1	1	202	29	48611	Gh_A10G1038
GO:0008661	1-deoxy-D-xylulose-5-phosphate synthase activity	molecular_function	0.11422	1	1	202	29	48611	Gh_D08G0270
GO:0016744	transferase activity, transferring aldehyde or ketonic groups	molecular_function	0.11422	1	1	202	29	48611	Gh_D08G0270
GO:1902578	single-organism localization	biological_process	0.11435	1	31	202	5954	48611	Gh_A08G1668,Gh_D09G0587,Gh_D08G1251,Gh_A05G3831,Gh_A11G0922,Gh_A05G0978,Gh_D04G1994,Gh_D02G1685,Gh_A03G0725,Gh_D05G0890,Gh_D10G1453,Gh_D02G1620,Gh_D07G1209,Gh_Sca010487G03,Gh_Sca010487G02,Gh_A06G0349,Gh_A12G0331,Gh_D09G1825,Gh_A12G0777,Gh_A06G1258,Gh_D03G1781,Gh_A01G0843,Gh_D11G0730,Gh_A11G2358,Gh_A01G1191,Gh_A11G3033,Gh_D01G1124,Gh_D12G2404,Gh_D13G0686,Gh_D12G1932,Gh_D04G0583
GO:0006812	cation transport	biological_process	0.11466	1	15	202	2550	48611	Gh_A03G0725,Gh_A01G0843,Gh_D04G1994,Gh_A11G2358,Gh_D11G0730,Gh_A05G3831,Gh_A11G0922,Gh_A06G0349,Gh_Sca010487G02,Gh_A05G0978,Gh_A12G0777,Gh_Sca010487G03,Gh_D07G1209,Gh_A11G3033,Gh_D12G2404
GO:0019013	viral nucleocapsid	cellular_component	0.11487	1	2	202	139	48611	Gh_D02G0503,Gh_D08G2349
GO:0051704	multi-organism process	biological_process	0.11583	1	19	202	3385	48611	Gh_A11G2358,Gh_A08G0319,Gh_D08G0417,Gh_D12G1363,Gh_D04G0317,Gh_D04G0583,Gh_A07G2043,Gh_D13G2004,Gh_A07G1608,Gh_D13G0438,Gh_A04G1404,Gh_A05G0978,Gh_A11G0922,Gh_D10G2202,Gh_D02G0503,Gh_Sca004751G01,Gh_A05G2494,Gh_A07G1702,Gh_A04G0970
GO:0044424	intracellular part	cellular_component	0.11597	1	60	202	12474	48611	Gh_A03G0725,Gh_D13G2069,Gh_A01G1126,Gh_A05G3831,Gh_Sca007622G02,Gh_D13G1470,Gh_D09G0587,Gh_D09G0269,Gh_A08G1584,Gh_Sca006711G02,Gh_D04G0469,Gh_A05G0716,Gh_D01G2275,Gh_A03G0149,Gh_Sca007035G04,Gh_D02G2152,Gh_D02G0877,Gh_A12G0816,Gh_A05G2854,Gh_A01G0843,Gh_D03G1781,Gh_A05G0713,Gh_A11G2358,Gh_D11G0730,Gh_D07G1578,Gh_A01G2111,Gh_A11G2663,Gh_A06G0349,Gh_D13G2339,Gh_A07G1608,Gh_D03G1091,Gh_D12G2711,Gh_…
GO:0000145	exocyst	cellular_component	0.11623	1	2	202	140	48611	Gh_D01G1124,Gh_D03G1781
GO:0015077	monovalent inorganic cation transmembrane transporter activity	molecular_function	0.11657	1	11	202	1749	48611	Gh_A11G3033,Gh_D12G2404,Gh_D07G1209,Gh_A11G0922,Gh_A05G3831,Gh_A06G0349,Gh_A12G0777,Gh_A03G0725,Gh_A01G0843,Gh_D11G0730,Gh_A11G2358
GO:0031974	membrane-enclosed lumen	cellular_component	0.11669	1	7	202	978	48611	Gh_A11G0922,Gh_A05G3831,Gh_D01G2275,Gh_D09G0587,Gh_A03G0149,Gh_A07G0876,Gh_A11G2358
GO:0019362	pyridine nucleotide metabolic process	biological_process	0.11729	1	3	202	285	48611	Gh_A08G0871,Gh_A07G1603,Gh_A09G0362
GO:0046496	nicotinamide nucleotide metabolic process	biological_process	0.11729	1	3	202	285	48611	Gh_A07G1603,Gh_A08G0871,Gh_A09G0362
GO:0006855	drug transmembrane transport	biological_process	0.11759	1	2	202	141	48611	Gh_D02G1620,Gh_D13G0686
GO:0015893	drug transport	biological_process	0.11759	1	2	202	141	48611	Gh_D02G1620,Gh_D13G0686
GO:0006370	7-methylguanosine mRNA capping	biological_process	0.11792	1	1	202	30	48611	Gh_A05G2854
GO:0006536	glutamate metabolic process	biological_process	0.11792	1	1	202	30	48611	Gh_D12G2422
GO:0032182	ubiquitin-like protein binding	molecular_function	0.11792	1	1	202	30	48611	Gh_D13G1464
GO:0043130	ubiquitin binding	molecular_function	0.11792	1	1	202	30	48611	Gh_D13G1464
GO:0047800	cysteamine dioxygenase activity	molecular_function	0.11792	1	1	202	30	48611	Gh_D04G0469
GO:0006811	ion transport	biological_process	0.11887	1	18	202	3188	48611	Gh_A01G0843,Gh_A11G2358,Gh_D11G0730,Gh_A06G0349,Gh_Sca010487G02,Gh_A12G0777,Gh_A11G3033,Gh_D13G0686,Gh_D12G2404,Gh_A03G0725,Gh_D04G1994,Gh_A05G3831,Gh_D08G1251,Gh_A11G0922,Gh_D09G0587,Gh_A05G0978,Gh_Sca010487G03,Gh_D07G1209
GO:0007606	sensory perception of chemical stimulus	biological_process	0.11896	1	2	202	142	48611	Gh_D09G1694,Gh_D05G0815
GO:0042493	response to drug	biological_process	0.11896	1	2	202	142	48611	Gh_D02G1620,Gh_D13G0686
GO:0006259	DNA metabolic process	biological_process	0.12131	1	22	202	4044	48611	Gh_A05G2494,Gh_A10G0578,Gh_A08G1584,Gh_D01G2275,Gh_D02G1685,Gh_D08G0270,Gh_D13G1470,Gh_A05G3831,Gh_D10G2202,Gh_A11G0922,Gh_D12G1468,Gh_D12G2711,Gh_D05G1158,Gh_D09G0593,Gh_A08G1015,Gh_D06G0902,Gh_D13G0686,Gh_A07G1240,Gh_A11G2358,Gh_A12G0777,Gh_D04G0317,Gh_D12G1363
GO:0007623	circadian rhythm	biological_process	0.1216	1	1	202	31	48611	Gh_D11G0730
GO:0009415	response to water	biological_process	0.1216	1	1	202	31	48611	Gh_D11G1826
GO:0016841	ammonia-lyase activity	molecular_function	0.1216	1	1	202	31	48611	Gh_A06G0406
GO:0050664	oxidoreductase activity, acting on NAD(P)H, oxygen as acceptor	molecular_function	0.1216	1	1	202	31	48611	Gh_D12G1932
GO:1901700	response to oxygen-containing compound	biological_process	0.1216	1	1	202	31	48611	Gh_D11G1826
GO:0044446	intracellular organelle part	cellular_component	0.12319	1	24	202	4481	48611	Gh_A11G0922,Gh_A05G3831,Gh_D09G0587,Gh_D04G0469,Gh_D05G0705,Gh_D01G2275,Gh_A05G0716,Gh_A03G0149,Gh_A01G0843,Gh_D11G0730,Gh_A11G2238,Gh_A11G2358,Gh_D07G1578,Gh_D13G2339,Gh_A06G0349,Gh_D07G0576,Gh_A12G0777,Gh_A07G0876,Gh_D12G2711,Gh_A12G1892,Gh_D02G1538,Gh_A11G3033,Gh_D12G2404,Gh_D13G0686
GO:0034655	nucleobase-containing compound catabolic process	biological_process	0.12447	1	2	202	146	48611	Gh_D13G2339,Gh_A11G2663
GO:0008174	mRNA methyltransferase activity	molecular_function	0.12527	1	1	202	32	48611	Gh_A05G2854
GO:0042578	phosphoric ester hydrolase activity	molecular_function	0.12556	1	5	202	631	48611	Gh_A11G0922,Gh_D04G0576,Gh_D13G0686,Gh_A01G0843,Gh_Sca010487G03
GO:0006096	glycolytic process	biological_process	0.12585	1	2	202	147	48611	Gh_A08G0871,Gh_A09G0362
GO:0006757	ATP generation from ADP	biological_process	0.12585	1	2	202	147	48611	Gh_A08G0871,Gh_A09G0362
GO:0009135	purine nucleoside diphosphate metabolic process	biological_process	0.12585	1	2	202	147	48611	Gh_A09G0362,Gh_A08G0871
GO:0009179	purine ribonucleoside diphosphate metabolic process	biological_process	0.12585	1	2	202	147	48611	Gh_A09G0362,Gh_A08G0871
GO:0009185	ribonucleoside diphosphate metabolic process	biological_process	0.12585	1	2	202	147	48611	Gh_A08G0871,Gh_A09G0362
GO:0046031	ADP metabolic process	biological_process	0.12585	1	2	202	147	48611	Gh_A09G0362,Gh_A08G0871
GO:0051536	iron-sulfur cluster binding	molecular_function	0.12662	1	4	202	459	48611	Gh_A06G0406,Gh_A10G0789,Gh_A11G0922,Gh_D06G0759
GO:0051540	metal cluster binding	molecular_function	0.12662	1	4	202	459	48611	Gh_A06G0406,Gh_A10G0789,Gh_D06G0759,Gh_A11G0922
GO:0015238	drug transmembrane transporter activity	molecular_function	0.12724	1	2	202	148	48611	Gh_D13G0686,Gh_D02G1620
GO:0090484	drug transporter activity	molecular_function	0.12724	1	2	202	148	48611	Gh_D02G1620,Gh_D13G0686
GO:0097367	carbohydrate derivative binding	molecular_function	0.12759	1	39	202	7798	48611	Gh_A08G1584,Gh_Sca006711G02,Gh_A05G2494,Gh_Sca010487G03,Gh_Sca004751G01,Gh_A11G2403,Gh_D09G0587,Gh_A05G1034,Gh_A12G1475,Gh_D10G2202,Gh_A05G3831,Gh_D10G0130,Gh_A01G0842,Gh_A08G2132,Gh_D12G1932,Gh_D04G0583,Gh_A07G1240,Gh_A05G2854,Gh_D05G0636,Gh_A12G0816,Gh_A11G2358,Gh_D01G0370,Gh_A09G2323,Gh_A03G0296,Gh_Sca010487G02,Gh_A11G2663,Gh_D05G3936,Gh_D05G2242,Gh_A11G0922,Gh_D02G0503,Gh_A05G0978,Gh_D13G2004…
GO:0005637	nuclear inner membrane	cellular_component	0.12892	1	1	202	33	48611	Gh_D05G0705
GO:0005639	integral component of nuclear inner membrane	cellular_component	0.12892	1	1	202	33	48611	Gh_D05G0705
GO:0016413	O-acetyltransferase activity	molecular_function	0.12892	1	1	202	33	48611	Gh_D13G2069
GO:0031229	intrinsic component of nuclear inner membrane	cellular_component	0.12892	1	1	202	33	48611	Gh_D05G0705
GO:0044453	nuclear membrane part	cellular_component	0.12892	1	1	202	33	48611	Gh_D05G0705
GO:1901264	carbohydrate derivative transport	biological_process	0.12892	1	1	202	33	48611	Gh_D12G1932
GO:0019439	aromatic compound catabolic process	biological_process	0.12918	1	3	202	298	48611	Gh_A13G1907,Gh_D13G2339,Gh_A11G2663
GO:0072524	pyridine-containing compound metabolic process	biological_process	0.13011	1	3	202	299	48611	Gh_A08G0871,Gh_A07G1603,Gh_A09G0362
GO:0043168	anion binding	molecular_function	0.13139	1	43	202	8717	48611	Gh_D08G1218,Gh_A05G0978,Gh_D08G0270,Gh_D02G0503,Gh_A11G0922,Gh_D05G1075,Gh_D05G2242,Gh_D12G2422,Gh_D05G3936,Gh_D05G2675,Gh_A08G0670,Gh_D07G0576,Gh_A12G0777,Gh_D04G0317,Gh_D11G3196,Gh_D13G2004,Gh_A06G1129,Gh_A11G3033,Gh_D10G0130,Gh_A05G3831,Gh_D10G2202,Gh_A05G1034,Gh_D09G0587,Gh_A12G1475,Gh_Sca004751G01,Gh_Sca010487G03,Gh_A05G2494,Gh_A08G1584,Gh_Sca006711G02,Gh_A09G0362,Gh_A11G2403,Gh_D01G0370,Gh_…
GO:0016763	transferase activity, transferring pentosyl groups	molecular_function	0.13143	1	2	202	151	48611	Gh_D04G0583,Gh_D05G2242
GO:0005544	calcium-dependent phospholipid binding	molecular_function	0.13256	1	1	202	34	48611	Gh_D05G2675
GO:0007205	protein kinase C-activating G-protein coupled receptor signaling pathway	biological_process	0.13256	1	1	202	34	48611	Gh_A11G2358
GO:0044422	organelle part	cellular_component	0.13355	1	24	202	4528	48611	Gh_D13G2339,Gh_A06G0349,Gh_A12G0777,Gh_D07G0576,Gh_A01G0843,Gh_A11G2358,Gh_D11G0730,Gh_A11G2238,Gh_D07G1578,Gh_A11G3033,Gh_D12G2404,Gh_D13G0686,Gh_A07G0876,Gh_D12G2711,Gh_A12G1892,Gh_D02G1538,Gh_A11G0922,Gh_A05G3831,Gh_D09G0587,Gh_D04G0469,Gh_A05G0716,Gh_D05G0705,Gh_D01G2275,Gh_A03G0149
GO:0016702	oxidoreductase activity, acting on single donors with incorporation of molecular oxygen, incorporation of two atoms of oxygen	molecular_function	0.13425	1	2	202	153	48611	Gh_D04G0469,Gh_A09G2247
GO:0016888	endodeoxyribonuclease activity, producing 5'-phosphomonoesters	molecular_function	0.13425	1	2	202	153	48611	Gh_D01G2275,Gh_D04G0317
GO:0006090	pyruvate metabolic process	biological_process	0.13566	1	2	202	154	48611	Gh_A09G0362,Gh_A08G0871
GO:0008047	enzyme activator activity	molecular_function	0.13566	1	2	202	154	48611	Gh_D06G1866,Gh_A07G1608
GO:0008192	RNA guanylyltransferase activity	molecular_function	0.13618	1	1	202	35	48611	Gh_A05G2854
GO:0019089	transmission of virus	biological_process	0.13618	1	1	202	35	48611	Gh_A07G1702
GO:0044007	dissemination or transmission of symbiont from host	biological_process	0.13618	1	1	202	35	48611	Gh_A07G1702
GO:0051821	dissemination or transmission of organism from other organism involved in symbiotic interaction	biological_process	0.13618	1	1	202	35	48611	Gh_A07G1702
GO:0070568	guanylyltransferase activity	molecular_function	0.13618	1	1	202	35	48611	Gh_A05G2854
GO:0016791	phosphatase activity	molecular_function	0.1376	1	4	202	474	48611	Gh_D04G0576,Gh_A11G0922,Gh_Sca010487G03,Gh_A01G0843
GO:0004601	peroxidase activity	molecular_function	0.13861	1	3	202	308	48611	Gh_D12G1932,Gh_A05G2374,Gh_D10G1880
GO:0004014	adenosylmethionine decarboxylase activity	molecular_function	0.13979	1	1	202	36	48611	Gh_A11G2358
GO:0005795	Golgi stack	cellular_component	0.13979	1	1	202	36	48611	Gh_A11G2358
GO:0008216	spermidine metabolic process	biological_process	0.13979	1	1	202	36	48611	Gh_A11G2358
GO:0008295	spermidine biosynthetic process	biological_process	0.13979	1	1	202	36	48611	Gh_A11G2358
GO:0046912	transferase activity, transferring acyl groups, acyl groups converted into alkyl on transfer	molecular_function	0.13979	1	1	202	36	48611	Gh_A03G2022
GO:0044423	virion part	cellular_component	0.14154	1	10	202	1619	48611	Gh_A05G1584,Gh_D08G2349,Gh_D02G0503,Gh_D10G2202,Gh_D04G0317,Gh_A05G2854,Gh_D01G1124,Gh_A11G0233,Gh_A07G2043,Gh_A10G0578
GO:0008610	lipid biosynthetic process	biological_process	0.14198	1	9	202	1421	48611	Gh_D13G0686,Gh_D06G0041,Gh_A03G2022,Gh_D05G1075,Gh_D02G0503,Gh_D10G0130,Gh_A01G0311,Gh_D08G0270,Gh_A11G2358
GO:0004143	diacylglycerol kinase activity	molecular_function	0.14338	1	1	202	37	48611	Gh_A11G2358
GO:0015937	coenzyme A biosynthetic process	biological_process	0.14338	1	1	202	37	48611	Gh_A05G3831
GO:0019082	viral protein processing	biological_process	0.14338	1	1	202	37	48611	Gh_D13G2004
GO:0019201	nucleotide kinase activity	molecular_function	0.14338	1	1	202	37	48611	Gh_D13G2004
GO:0033866	nucleoside bisphosphate biosynthetic process	biological_process	0.14338	1	1	202	37	48611	Gh_A05G3831
GO:0034030	ribonucleoside bisphosphate biosynthetic process	biological_process	0.14338	1	1	202	37	48611	Gh_A05G3831
GO:0034033	purine nucleoside bisphosphate biosynthetic process	biological_process	0.14338	1	1	202	37	48611	Gh_A05G3831
GO:0044780	bacterial-type flagellum assembly	biological_process	0.14338	1	1	202	37	48611	Gh_A11G3033
GO:0046131	pyrimidine ribonucleoside metabolic process	biological_process	0.14338	1	1	202	37	48611	Gh_D10G2202
GO:0006366	transcription from RNA polymerase II promoter	biological_process	0.14362	1	4	202	482	48611	Gh_A11G2358,Gh_D09G0587,Gh_A03G0149,Gh_A11G0922
GO:0006165	nucleoside diphosphate phosphorylation	biological_process	0.14419	1	2	202	160	48611	Gh_A09G0362,Gh_A08G0871
GO:0046939	nucleotide phosphorylation	biological_process	0.14419	1	2	202	160	48611	Gh_A08G0871,Gh_A09G0362
GO:0003678	DNA helicase activity	molecular_function	0.14513	1	4	202	484	48611	Gh_D10G2202,Gh_D04G0317,Gh_A07G1240,Gh_A11G2358
GO:0007600	sensory perception	biological_process	0.14563	1	2	202	161	48611	Gh_D09G1694,Gh_D05G0815
GO:0050877	neurological system process	biological_process	0.14563	1	2	202	161	48611	Gh_D09G1694,Gh_D05G0815
GO:0044271	cellular nitrogen compound biosynthetic process	biological_process	0.1478	1	47	202	9718	48611	Gh_A03G0296,Gh_A06G0349,Gh_A01G2111,Gh_D02G1093,Gh_D03G1781,Gh_A12G1973,Gh_A05G0713,Gh_D02G0877,Gh_A01G0843,Gh_A09G0411,Gh_A05G2854,Gh_D07G1578,Gh_A11G2358,Gh_D11G0730,Gh_D12G2711,Gh_D03G1091,Gh_D06G0894,Gh_D06G0759,Gh_D09G0587,Gh_A05G3831,Gh_D13G1470,Gh_D10G2202,Gh_D09G0269,Gh_A03G0725,Gh_Sca005611G02,Gh_A01G1126,Gh_A09G2247,Gh_A03G0149,Gh_D02G2152,Gh_A08G1584,Gh_A12G0777,Gh_D08G1212,Gh_A06G0222…
GO:0034654	nucleobase-containing compound biosynthetic process	biological_process	0.1484	1	35	202	7018	48611	Gh_A11G2358,Gh_D11G0730,Gh_D07G1578,Gh_A09G0411,Gh_D02G0877,Gh_A01G0843,Gh_A12G1973,Gh_D02G1093,Gh_A03G0296,Gh_A06G0349,Gh_D06G0894,Gh_D03G1091,Gh_D12G2711,Gh_A03G0725,Gh_Sca005611G02,Gh_D13G1470,Gh_A05G3831,Gh_D10G2202,Gh_D06G0759,Gh_D09G0587,Gh_A08G1584,Gh_D02G2152,Gh_A03G0149,Gh_A09G2247,Gh_A06G0222,Gh_A12G0777,Gh_A07G0876,Gh_D12G2404,Gh_Sca006892G01,Gh_D01G1124,Gh_A11G3033,Gh_A11G0922,Gh_D02G…
GO:0050896	response to stimulus	biological_process	0.14907	1	31	202	6132	48611	Gh_A11G3013,Gh_D05G0815,Gh_D01G2275,Gh_D10G1880,Gh_A07G1965,Gh_D02G1620,Gh_D02G1619,Gh_A05G2374,Gh_D13G1470,Gh_A11G0922,Gh_D10G2202,Gh_A05G3831,Gh_D06G0759,Gh_D08G0270,Gh_D11G1826,Gh_D09G0593,Gh_D06G0894,Gh_A12G1240,Gh_A07G1240,Gh_D13G0686,Gh_A09G0411,Gh_D13G1348,Gh_D06G1866,Gh_D11G0730,Gh_A11G2358,Gh_D02G0146,Gh_D10G2261,Gh_D05G2734,Gh_A03G0296,Gh_D04G0317,Gh_A12G0777
GO:0048511	rhythmic process	biological_process	0.15052	1	1	202	39	48611	Gh_D11G0730
GO:0051606	detection of stimulus	biological_process	0.15052	1	1	202	39	48611	Gh_D05G0815
GO:0009523	photosystem II	cellular_component	0.15282	1	4	202	494	48611	Gh_D08G1218,Gh_D06G0894,Gh_A12G0777,Gh_Sca007622G02
GO:0006541	glutamine metabolic process	biological_process	0.15407	1	1	202	40	48611	Gh_A05G0700
GO:0008242	omega peptidase activity	molecular_function	0.15407	1	1	202	40	48611	Gh_A05G3831
GO:0009218	pyrimidine ribonucleotide metabolic process	biological_process	0.15407	1	1	202	40	48611	Gh_D10G2202
GO:0009220	pyrimidine ribonucleotide biosynthetic process	biological_process	0.15407	1	1	202	40	48611	Gh_D10G2202
GO:0044781	bacterial-type flagellum organization	biological_process	0.15407	1	1	202	40	48611	Gh_A11G3033
GO:0051539	4 iron, 4 sulfur cluster binding	molecular_function	0.15407	1	1	202	40	48611	Gh_A06G0406
GO:0016684	oxidoreductase activity, acting on peroxide as acceptor	molecular_function	0.15416	1	3	202	324	48611	Gh_A05G2374,Gh_D12G1932,Gh_D10G1880
GO:0034660	ncRNA metabolic process	biological_process	0.15503	1	7	202	1057	48611	Gh_A11G2358,Gh_D06G1600,Gh_A01G1083,Gh_A09G0411,Gh_D09G0615,Gh_D02G2152,Gh_D10G2202
GO:0032940	secretion by cell	biological_process	0.15515	1	3	202	325	48611	Gh_D01G1124,Gh_D03G1781,Gh_A11G2358
GO:0007005	mitochondrion organization	biological_process	0.15574	1	2	202	168	48611	Gh_A11G2358,Gh_A05G0716
GO:0006733	oxidoreduction coenzyme metabolic process	biological_process	0.15614	1	3	202	326	48611	Gh_A09G0362,Gh_A07G1603,Gh_A08G0871
GO:0000097	sulfur amino acid biosynthetic process	biological_process	0.1576	1	1	202	41	48611	Gh_D13G2069
GO:0044260	cellular macromolecule metabolic process	biological_process	0.15797	1	78	202	16946	48611	Gh_A05G2494,Gh_A10G0578,Gh_A08G1584,Gh_D02G2152,Gh_A01G1126,Gh_D10G0130,Gh_D09G0269,Gh_A05G3831,Gh_D13G1470,Gh_A05G1034,Gh_D06G0759,Gh_D06G0894,Gh_A01G0842,Gh_D09G0593,Gh_A07G1240,Gh_D04G0576,Gh_D01G0370,Gh_A09G2323,Gh_D06G1866,Gh_A05G2854,Gh_D03G1781,Gh_A12G1973,Gh_A05G0713,Gh_D02G1093,Gh_A01G0311,Gh_A11G2663,Gh_A01G2111,Gh_D13G2339,Gh_A11G3013,Gh_D08G0270,Gh_A11G0922,Gh_D08G0567,Gh_D02G0503,Gh_…
GO:0009132	nucleoside diphosphate metabolic process	biological_process	0.16012	1	2	202	171	48611	Gh_A09G0362,Gh_A08G0871
GO:0006595	polyamine metabolic process	biological_process	0.16112	1	1	202	42	48611	Gh_A11G2358
GO:0006596	polyamine biosynthetic process	biological_process	0.16112	1	1	202	42	48611	Gh_A11G2358
GO:0008138	protein tyrosine/serine/threonine phosphatase activity	molecular_function	0.16112	1	1	202	42	48611	Gh_D04G0576
GO:1901565	organonitrogen compound catabolic process	biological_process	0.16113	1	3	202	331	48611	Gh_A11G0922,Gh_A13G1907,Gh_A09G2323
GO:0046903	secretion	biological_process	0.16213	1	3	202	332	48611	Gh_A11G2358,Gh_D03G1781,Gh_D01G1124
GO:0009057	macromolecule catabolic process	biological_process	0.1626	1	6	202	878	48611	Gh_A11G2663,Gh_D13G2339,Gh_D13G0686,Gh_A11G3013,Gh_A11G2358,Gh_A09G2323
GO:0048522	positive regulation of cellular process	biological_process	0.16384	1	4	202	508	48611	Gh_A12G0777,Gh_A11G3033,Gh_A05G3831,Gh_A11G2238
GO:0004356	glutamate-ammonia ligase activity	molecular_function	0.16462	1	1	202	43	48611	Gh_A05G0700
GO:0004797	thymidine kinase activity	molecular_function	0.16462	1	1	202	43	48611	Gh_A12G1475
GO:0006213	pyrimidine nucleoside metabolic process	biological_process	0.16462	1	1	202	43	48611	Gh_D10G2202
GO:0016624	oxidoreductase activity, acting on the aldehyde or oxo group of donors, disulfide as acceptor	molecular_function	0.16462	1	1	202	43	48611	Gh_D08G0270
GO:0019136	deoxynucleoside kinase activity	molecular_function	0.16462	1	1	202	43	48611	Gh_A12G1475
GO:0019206	nucleoside kinase activity	molecular_function	0.16462	1	1	202	43	48611	Gh_A12G1475
GO:0004540	ribonuclease activity	molecular_function	0.16721	1	5	202	696	48611	Gh_A11G2358,Gh_D05G1158,Gh_D08G0270,Gh_A12G0777,Gh_D10G2202
GO:0034062	RNA polymerase activity	molecular_function	0.16734	1	6	202	886	48611	Gh_A05G2494,Gh_A11G2358,Gh_D02G1093,Gh_D02G2152,Gh_D01G1124,Gh_A03G0149
GO:0008170	N-methyltransferase activity	molecular_function	0.16746	1	2	202	176	48611	Gh_A12G1973,Gh_A05G2854
GO:0006563	L-serine metabolic process	biological_process	0.16811	1	1	202	44	48611	Gh_D13G2069
GO:0008176	tRNA (guanine-N7-)-methyltransferase activity	molecular_function	0.16811	1	1	202	44	48611	Gh_D09G0615
GO:0010942	positive regulation of cell death	biological_process	0.16811	1	1	202	44	48611	Gh_A11G2238
GO:0043065	positive regulation of apoptotic process	biological_process	0.16811	1	1	202	44	48611	Gh_A11G2238
GO:0043068	positive regulation of programmed cell death	biological_process	0.16811	1	1	202	44	48611	Gh_A11G2238
GO:1990204	oxidoreductase complex	cellular_component	0.17042	1	2	202	178	48611	Gh_D02G1538,Gh_D13G2339
GO:0097164	ammonium ion metabolic process	biological_process	0.17158	1	1	202	45	48611	Gh_A11G2358
GO:0005623	cell	cellular_component	0.173	1	66	202	14239	48611	Gh_Sca007035G04,Gh_A05G0716,Gh_A03G0149,Gh_D01G2275,Gh_D04G0469,Gh_Sca006711G02,Gh_D09G0587,Gh_D10G2202,Gh_A08G1015,Gh_D12G1932,Gh_D12G2711,Gh_D03G1091,Gh_A07G1608,Gh_A06G0349,Gh_D07G1578,Gh_A11G2358,Gh_D11G0730,Gh_A12G0816,Gh_A01G0843,Gh_D02G0877,Gh_Sca006756G05,Gh_D10G0292,Gh_A05G2374,Gh_D12G2404,Gh_D13G0686,Gh_D01G1124,Gh_A12G1892,Gh_D05G1158,Gh_D11G3196,Gh_D08G1212,Gh_D02G2152,Gh_A08G1584,Gh_…
GO:0044464	cell part	cellular_component	0.173	1	66	202	14239	48611	Gh_D05G3040,Gh_Sca005362G04,Gh_D06G0894,Gh_D13G2339,Gh_A11G2663,Gh_A01G2111,Gh_D03G1781,Gh_A12G1973,Gh_A05G0713,Gh_D06G1866,Gh_A05G2854,Gh_D02G2152,Gh_A08G1584,Gh_D09G0269,Gh_D13G1470,Gh_Sca007622G02,Gh_D08G1251,Gh_A05G3831,Gh_A01G1126,Gh_D13G2069,Gh_A03G0725,Gh_A11G3033,Gh_D02G1538,Gh_A07G0876,Gh_D07G0576,Gh_A12G0777,Gh_D04G0317,Gh_A11G2238,Gh_D05G0705,Gh_D08G0270,Gh_Sca005362G03,Gh_Sca007622G03…
GO:0001101	response to acid chemical	biological_process	0.17504	1	1	202	46	48611	Gh_D11G1826
GO:0001897	cytolysis by symbiont of host cells	biological_process	0.17504	1	1	202	46	48611	Gh_A04G1404
GO:0004611	phosphoenolpyruvate carboxykinase activity	molecular_function	0.17504	1	1	202	46	48611	Gh_A11G3033
GO:0009129	pyrimidine nucleoside monophosphate metabolic process	biological_process	0.17504	1	1	202	46	48611	Gh_D10G2202
GO:0009130	pyrimidine nucleoside monophosphate biosynthetic process	biological_process	0.17504	1	1	202	46	48611	Gh_D10G2202
GO:0016211	ammonia ligase activity	molecular_function	0.17504	1	1	202	46	48611	Gh_A05G0700
GO:0016880	acid-ammonia (or amide) ligase activity	molecular_function	0.17504	1	1	202	46	48611	Gh_A05G0700
GO:0019836	hemolysis by symbiont of host erythrocytes	biological_process	0.17504	1	1	202	46	48611	Gh_A04G1404
GO:0005976	polysaccharide metabolic process	biological_process	0.1764	1	6	202	901	48611	Gh_A11G2358,Gh_D08G0270,Gh_D10G0130,Gh_A01G0311,Gh_D04G0317,Gh_D02G0503
GO:0009452	7-methylguanosine RNA capping	biological_process	0.17849	1	1	202	47	48611	Gh_A05G2854
GO:0016011	dystroglycan complex	cellular_component	0.17849	1	1	202	47	48611	Gh_A11G2358
GO:0016012	sarcoglycan complex	cellular_component	0.17849	1	1	202	47	48611	Gh_A11G2358
GO:0036260	RNA capping	biological_process	0.17849	1	1	202	47	48611	Gh_A05G2854
GO:0006672	ceramide metabolic process	biological_process	0.18192	1	1	202	48	48611	Gh_A11G0922
GO:0016168	chlorophyll binding	molecular_function	0.18192	1	1	202	48	48611	Gh_Sca005362G04
GO:0003854	3-beta-hydroxy-delta5-steroid dehydrogenase activity	molecular_function	0.18381	1	2	202	187	48611	Gh_A01G0311,Gh_D06G0041
GO:0016229	steroid dehydrogenase activity	molecular_function	0.18381	1	2	202	187	48611	Gh_A01G0311,Gh_D06G0041
GO:0033764	steroid dehydrogenase activity, acting on the CH-OH group of donors, NAD or NADP as acceptor	molecular_function	0.18381	1	2	202	187	48611	Gh_A01G0311,Gh_D06G0041
GO:0004520	endodeoxyribonuclease activity	molecular_function	0.18531	1	2	202	188	48611	Gh_D04G0317,Gh_D01G2275
GO:0030077	plasma membrane light-harvesting complex	cellular_component	0.18534	1	1	202	49	48611	Gh_D13G2339
GO:0031965	nuclear membrane	cellular_component	0.18534	1	1	202	49	48611	Gh_D05G0705
GO:0042716	plasma membrane-derived chromatophore	cellular_component	0.18534	1	1	202	49	48611	Gh_D13G2339
GO:0032553	ribonucleotide binding	molecular_function	0.18671	1	37	202	7650	48611	Gh_A05G0978,Gh_D05G2242,Gh_D02G0503,Gh_A11G0922,Gh_D05G3936,Gh_A12G0777,Gh_D07G0576,Gh_A08G0670,Gh_D04G0317,Gh_D13G2004,Gh_D11G3196,Gh_A11G3033,Gh_A06G1129,Gh_D10G0130,Gh_A05G1034,Gh_D09G0587,Gh_A12G1475,Gh_D10G2202,Gh_A05G3831,Gh_Sca010487G03,Gh_A05G2494,Gh_Sca004751G01,Gh_A08G1584,Gh_Sca006711G02,Gh_A11G2403,Gh_D01G0370,Gh_A11G2358,Gh_D05G0636,Gh_A05G2854,Gh_A12G0816,Gh_Sca010487G02,Gh_A03G0296…
GO:0043170	macromolecule metabolic process	biological_process	0.18785	1	83	202	18312	48611	Gh_D12G1468,Gh_D11G3196,Gh_D05G1158,Gh_D13G0686,Gh_D01G1124,Gh_Sca006892G01,Gh_D08G1212,Gh_D02G0790,Gh_A13G1907,Gh_D03G0729,Gh_A04G0970,Gh_D10G0292,Gh_A05G2374,Gh_A08G2132,Gh_D03G1091,Gh_D12G2711,Gh_A08G1015,Gh_D09G0615,Gh_D06G0902,Gh_A11G2358,Gh_D07G1578,Gh_D02G0877,Gh_A09G0411,Gh_D12G1363,Gh_A03G0296,Gh_A06G0349,Gh_Sca006711G02,Gh_D04G0469,Gh_A03G0149,Gh_D01G2275,Gh_A09G2247,Gh_Sca005611G02,Gh_…
GO:0006355	regulation of transcription, DNA-templated	biological_process	0.18794	1	26	202	5188	48611	Gh_D06G0894,Gh_D12G2711,Gh_D03G1091,Gh_A11G3033,Gh_Sca006892G01,Gh_D07G1578,Gh_A11G2358,Gh_A12G1973,Gh_A06G0222,Gh_D02G0877,Gh_A09G0411,Gh_A12G0777,Gh_A03G0296,Gh_D02G0790,Gh_A08G1584,Gh_D02G2152,Gh_A03G0149,Gh_A09G2247,Gh_D10G0292,Gh_Sca005611G02,Gh_D06G0759,Gh_D09G0587,Gh_D13G1470,Gh_D10G2202,Gh_A11G0922,Gh_A05G3831
GO:1903506	regulation of nucleic acid-templated transcription	biological_process	0.18794	1	26	202	5188	48611	Gh_D06G0894,Gh_D03G1091,Gh_D12G2711,Gh_Sca006892G01,Gh_A11G3033,Gh_A11G2358,Gh_D07G1578,Gh_D02G0877,Gh_A09G0411,Gh_A06G0222,Gh_A12G1973,Gh_A12G0777,Gh_A03G0296,Gh_D02G0790,Gh_A08G1584,Gh_D02G2152,Gh_D10G0292,Gh_A09G2247,Gh_A03G0149,Gh_Sca005611G02,Gh_A05G3831,Gh_D13G1470,Gh_D10G2202,Gh_A11G0922,Gh_D09G0587,Gh_D06G0759
GO:0007015	actin filament organization	biological_process	0.18874	1	1	202	50	48611	Gh_A05G0700
GO:0042030	ATPase inhibitor activity	molecular_function	0.18874	1	1	202	50	48611	Gh_A11G2358
GO:0001907	killing by symbiont of host cells	biological_process	0.19213	1	1	202	51	48611	Gh_A04G1404
GO:0007268	synaptic transmission	biological_process	0.19213	1	1	202	51	48611	Gh_A05G3831
GO:0044004	disruption by symbiont of host cell	biological_process	0.19213	1	1	202	51	48611	Gh_A04G1404
GO:0035639	purine ribonucleoside triphosphate binding	molecular_function	0.19215	1	36	202	7448	48611	Gh_D04G0317,Gh_D07G0576,Gh_A12G0777,Gh_A08G0670,Gh_A11G3033,Gh_A06G1129,Gh_D11G3196,Gh_D13G2004,Gh_D05G2242,Gh_A11G0922,Gh_D02G0503,Gh_A05G0978,Gh_A03G0296,Gh_Sca010487G02,Gh_A11G2663,Gh_A05G2854,Gh_D05G0636,Gh_A12G0816,Gh_A11G2358,Gh_D01G0370,Gh_A07G1240,Gh_A01G0842,Gh_A08G2132,Gh_D04G0583,Gh_D09G0587,Gh_A05G1034,Gh_A12G1475,Gh_D10G2202,Gh_A05G3831,Gh_D10G0130,Gh_A11G2403,Gh_A08G1584,Gh_Sca00671…
GO:0051252	regulation of RNA metabolic process	biological_process	0.19245	1	26	202	5205	48611	Gh_D03G1091,Gh_D12G2711,Gh_D06G0894,Gh_Sca006892G01,Gh_A11G3033,Gh_A09G0411,Gh_D02G0877,Gh_A06G0222,Gh_A12G1973,Gh_A11G2358,Gh_D07G1578,Gh_A03G0296,Gh_A12G0777,Gh_A08G1584,Gh_D02G0790,Gh_D10G0292,Gh_A03G0149,Gh_A09G2247,Gh_D02G2152,Gh_Sca005611G02,Gh_D10G2202,Gh_D13G1470,Gh_A05G3831,Gh_A11G0922,Gh_D09G0587,Gh_D06G0759
GO:2001141	regulation of RNA biosynthetic process	biological_process	0.19245	1	26	202	5205	48611	Gh_A06G0222,Gh_A12G1973,Gh_D02G0877,Gh_A09G0411,Gh_D07G1578,Gh_A11G2358,Gh_A03G0296,Gh_A12G0777,Gh_D12G2711,Gh_D03G1091,Gh_D06G0894,Gh_A11G3033,Gh_Sca006892G01,Gh_Sca005611G02,Gh_D06G0759,Gh_D09G0587,Gh_D13G1470,Gh_A05G3831,Gh_D10G2202,Gh_A11G0922,Gh_A08G1584,Gh_D02G0790,Gh_A03G0149,Gh_A09G2247,Gh_D10G0292,Gh_D02G2152
GO:0008565	protein transporter activity	molecular_function	0.19282	1	2	202	193	48611	Gh_D05G2242,Gh_D02G1649
GO:0015276	ligand-gated ion channel activity	molecular_function	0.19282	1	2	202	193	48611	Gh_A07G1608,Gh_D02G1649
GO:0022834	ligand-gated channel activity	molecular_function	0.19282	1	2	202	193	48611	Gh_A07G1608,Gh_D02G1649
GO:0042623	ATPase activity, coupled	molecular_function	0.19446	1	6	202	930	48611	Gh_A07G1240,Gh_D04G0317,Gh_A05G3831,Gh_D10G2202,Gh_D04G0583,Gh_Sca004751G01
GO:0048518	positive regulation of biological process	biological_process	0.19509	1	4	202	546	48611	Gh_A11G2238,Gh_A05G3831,Gh_A11G3033,Gh_A12G0777
GO:0048869	cellular developmental process	biological_process	0.19517	1	3	202	364	48611	Gh_D04G0583,Gh_A11G2358,Gh_A11G0922
GO:0001653	peptide receptor activity	molecular_function	0.1955	1	1	202	52	48611	Gh_D11G0730
GO:0008528	G-protein coupled peptide receptor activity	molecular_function	0.1955	1	1	202	52	48611	Gh_D11G0730
GO:0009538	photosystem I reaction center	cellular_component	0.1955	1	1	202	52	48611	Gh_D08G0270
GO:0009916	alternative oxidase activity	molecular_function	0.1955	1	1	202	52	48611	Gh_A04G0970
GO:0051801	cytolysis in other organism involved in symbiotic interaction	biological_process	0.1955	1	1	202	52	48611	Gh_A04G1404
GO:0052331	hemolysis in other organism involved in symbiotic interaction	biological_process	0.1955	1	1	202	52	48611	Gh_A04G1404
GO:0006721	terpenoid metabolic process	biological_process	0.19584	1	2	202	195	48611	Gh_D05G1075,Gh_D08G0270
GO:0016114	terpenoid biosynthetic process	biological_process	0.19584	1	2	202	195	48611	Gh_D08G0270,Gh_D05G1075
GO:0003824	catalytic activity	molecular_function	0.19797	1	113	202	25517	48611	Gh_A05G2255,Gh_D13G0686,Gh_D01G1124,Gh_D12G1468,Gh_D11G3196,Gh_D05G1158,Gh_A03G0734,Gh_D08G0085,Gh_A08G0871,Gh_A05G2374,Gh_D12G2422,Gh_A05G0700,Gh_A04G0970,Gh_A13G1907,Gh_A03G2036,Gh_A03G0296,Gh_Sca010487G02,Gh_A11G2358,Gh_D07G1578,Gh_A01G0843,Gh_A09G0411,Gh_D02G1418,Gh_A08G1015,Gh_D06G0902,Gh_D09G0615,Gh_A08G2132,Gh_D12G1932,Gh_D03G1091,Gh_A07G1608,Gh_D10G2202,Gh_D09G0587,Gh_A08G1668,Gh_A12G1475…
GO:1901607	alpha-amino acid biosynthetic process	biological_process	0.19835	1	3	202	367	48611	Gh_D13G2069,Gh_A05G0700,Gh_D12G2422
GO:0015718	monocarboxylic acid transport	biological_process	0.19886	1	1	202	53	48611	Gh_D13G0686
GO:0005179	hormone activity	molecular_function	0.19941	1	3	202	368	48611	Gh_A12G0777,Gh_A03G0296,Gh_A11G3013
GO:0006351	transcription, DNA-templated	biological_process	0.20126	1	30	202	6133	48611	Gh_D02G0790,Gh_A08G1584,Gh_D02G2152,Gh_D03G0729,Gh_A09G2247,Gh_A03G0149,Gh_D10G0292,Gh_Sca005611G02,Gh_D06G0759,Gh_D09G0587,Gh_D10G2202,Gh_D13G1470,Gh_A11G0922,Gh_A05G3831,Gh_D06G0894,Gh_D12G2711,Gh_A07G0876,Gh_D03G1091,Gh_A11G3033,Gh_Sca006892G01,Gh_D01G1124,Gh_D07G1578,Gh_A11G2358,Gh_A06G0222,Gh_A12G1973,Gh_A09G0411,Gh_D02G0877,Gh_A12G0777,Gh_D02G1093,Gh_A03G0296
GO:0097659	nucleic acid-templated transcription	biological_process	0.20126	1	30	202	6133	48611	Gh_D02G2152,Gh_D03G0729,Gh_A03G0149,Gh_A09G2247,Gh_D10G0292,Gh_D02G0790,Gh_A08G1584,Gh_D06G0759,Gh_D09G0587,Gh_D13G1470,Gh_D10G2202,Gh_A05G3831,Gh_A11G0922,Gh_Sca005611G02,Gh_A11G3033,Gh_D01G1124,Gh_Sca006892G01,Gh_D06G0894,Gh_D12G2711,Gh_A07G0876,Gh_D03G1091,Gh_A12G0777,Gh_D02G1093,Gh_A03G0296,Gh_D07G1578,Gh_A11G2358,Gh_A06G0222,Gh_A12G1973,Gh_A09G0411,Gh_D02G0877
GO:0003008	system process	biological_process	0.20189	1	2	202	199	48611	Gh_D05G0815,Gh_D09G1694
GO:0000148	1,3-beta-D-glucan synthase complex	cellular_component	0.20221	1	1	202	54	48611	Gh_D04G0317
GO:0003843	1,3-beta-D-glucan synthase activity	molecular_function	0.20221	1	1	202	54	48611	Gh_D04G0317
GO:0006074	(1->3)-beta-D-glucan metabolic process	biological_process	0.20221	1	1	202	54	48611	Gh_D04G0317
GO:0006075	(1->3)-beta-D-glucan biosynthetic process	biological_process	0.20221	1	1	202	54	48611	Gh_D04G0317
GO:0009975	cyclase activity	molecular_function	0.20221	1	1	202	54	48611	Gh_A07G0166
GO:0006694	steroid biosynthetic process	biological_process	0.2034	1	2	202	200	48611	Gh_A01G0311,Gh_D06G0041
GO:0044724	single-organism carbohydrate catabolic process	biological_process	0.2034	1	2	202	200	48611	Gh_A08G0871,Gh_A09G0362
GO:0004553	hydrolase activity, hydrolyzing O-glycosyl compounds	molecular_function	0.20435	1	8	202	1350	48611	Gh_A11G0922,Gh_D08G0270,Gh_A08G0871,Gh_A11G2358,Gh_A09G2323,Gh_D06G0902,Gh_A08G1584,Gh_D05G0815
GO:0003899	DNA-directed RNA polymerase activity	molecular_function	0.20447	1	4	202	557	48611	Gh_D02G1093,Gh_D02G2152,Gh_D01G1124,Gh_A03G0149
GO:0044448	cell cortex part	cellular_component	0.20492	1	2	202	201	48611	Gh_D03G1781,Gh_D01G1124
GO:0004568	chitinase activity	molecular_function	0.20554	1	1	202	55	48611	Gh_A09G2323
GO:0006032	chitin catabolic process	biological_process	0.20554	1	1	202	55	48611	Gh_A09G2323
GO:0046348	amino sugar catabolic process	biological_process	0.20554	1	1	202	55	48611	Gh_A09G2323
GO:1901072	glucosamine-containing compound catabolic process	biological_process	0.20554	1	1	202	55	48611	Gh_A09G2323
GO:0004860	protein kinase inhibitor activity	molecular_function	0.20886	1	1	202	56	48611	Gh_A07G1603
GO:0015936	coenzyme A metabolic process	biological_process	0.20886	1	1	202	56	48611	Gh_A05G3831
GO:0016886	ligase activity, forming phosphoric ester bonds	molecular_function	0.20886	1	1	202	56	48611	Gh_D10G2202
GO:0019210	kinase inhibitor activity	molecular_function	0.20886	1	1	202	56	48611	Gh_A07G1603
GO:0044179	hemolysis in other organism	biological_process	0.20886	1	1	202	56	48611	Gh_A04G1404
GO:0016051	carbohydrate biosynthetic process	biological_process	0.21188	1	6	202	957	48611	Gh_A06G0406,Gh_D10G0130,Gh_A01G0311,Gh_D02G0503,Gh_A11G3033,Gh_D04G0317
GO:0007267	cell-cell signaling	biological_process	0.21217	1	1	202	57	48611	Gh_A05G3831
GO:0042301	phosphate ion binding	molecular_function	0.21217	1	1	202	57	48611	Gh_D08G1218
GO:0051205	protein insertion into membrane	biological_process	0.21217	1	1	202	57	48611	Gh_A11G2358
GO:0051818	disruption of cells of other organism involved in symbiotic interaction	biological_process	0.21217	1	1	202	57	48611	Gh_A04G1404
GO:0051883	killing of cells in other organism involved in symbiotic interaction	biological_process	0.21217	1	1	202	57	48611	Gh_A04G1404
GO:0019219	regulation of nucleobase-containing compound metabolic process	biological_process	0.21272	1	26	202	5279	48611	Gh_A12G1973,Gh_A06G0222,Gh_D02G0877,Gh_A09G0411,Gh_D07G1578,Gh_A11G2358,Gh_A03G0296,Gh_A12G0777,Gh_D12G2711,Gh_D03G1091,Gh_D06G0894,Gh_A11G3033,Gh_Sca006892G01,Gh_Sca005611G02,Gh_D09G0587,Gh_D06G0759,Gh_D13G1470,Gh_D10G2202,Gh_A05G3831,Gh_A11G0922,Gh_A08G1584,Gh_D02G0790,Gh_A09G2247,Gh_A03G0149,Gh_D10G0292,Gh_D02G2152
GO:1901362	organic cyclic compound biosynthetic process	biological_process	0.21333	1	38	202	7994	48611	Gh_A07G0876,Gh_Sca006892G01,Gh_D01G1124,Gh_A11G3033,Gh_D12G2404,Gh_A06G0222,Gh_A12G0777,Gh_D02G0790,Gh_D10G0292,Gh_D03G0729,Gh_D12G2422,Gh_A11G0922,Gh_D03G1091,Gh_D12G2711,Gh_D06G0894,Gh_A09G0411,Gh_D02G0877,Gh_A01G0843,Gh_A12G1973,Gh_A11G2358,Gh_D11G0730,Gh_D07G1578,Gh_A06G0349,Gh_A03G0296,Gh_A01G0311,Gh_D02G1093,Gh_A08G1584,Gh_A03G0149,Gh_A09G2247,Gh_D06G0041,Gh_D02G2152,Gh_A03G0725,Gh_Sca00561…
GO:0022836	gated channel activity	molecular_function	0.21334	1	3	202	381	48611	Gh_A07G1608,Gh_D07G1209,Gh_D02G1649
GO:0005227	calcium activated cation channel activity	molecular_function	0.21546	1	1	202	58	48611	Gh_D07G1209
GO:0006665	sphingolipid metabolic process	biological_process	0.21546	1	1	202	58	48611	Gh_A11G0922
GO:0015269	calcium-activated potassium channel activity	molecular_function	0.21546	1	1	202	58	48611	Gh_D07G1209
GO:0022839	ion gated channel activity	molecular_function	0.21546	1	1	202	58	48611	Gh_D07G1209
GO:0050909	sensory perception of taste	biological_process	0.21546	1	1	202	58	48611	Gh_D05G0815
GO:2000112	regulation of cellular macromolecule biosynthetic process	biological_process	0.21554	1	26	202	5289	48611	Gh_D03G1091,Gh_D12G2711,Gh_D06G0894,Gh_Sca006892G01,Gh_A11G3033,Gh_D02G0877,Gh_A09G0411,Gh_A06G0222,Gh_A12G1973,Gh_A11G2358,Gh_D07G1578,Gh_A03G0296,Gh_A12G0777,Gh_A08G1584,Gh_D02G0790,Gh_D10G0292,Gh_A09G2247,Gh_A03G0149,Gh_D02G2152,Gh_Sca005611G02,Gh_A05G3831,Gh_D13G1470,Gh_D10G2202,Gh_A11G0922,Gh_D06G0759,Gh_D09G0587
GO:0044085	cellular component biogenesis	biological_process	0.21581	1	9	202	1579	48611	Gh_A09G0411,Gh_D06G1600,Gh_A11G2358,Gh_D02G0503,Gh_D04G0583,Gh_A11G3033,Gh_A10G1038,Gh_A08G1015,Gh_D02G2152
GO:0019318	hexose metabolic process	biological_process	0.21711	1	2	202	209	48611	Gh_A11G3033,Gh_A06G0406
GO:0042221	response to chemical	biological_process	0.21746	1	4	202	572	48611	Gh_D13G0686,Gh_D02G1620,Gh_D05G0815,Gh_D11G1826
GO:0003724	RNA helicase activity	molecular_function	0.21767	1	3	202	385	48611	Gh_A07G1240,Gh_Sca010487G02,Gh_Sca010487G03
GO:0045333	cellular respiration	biological_process	0.21767	1	3	202	385	48611	Gh_D13G1464,Gh_D02G1538,Gh_D13G2339
GO:0007018	microtubule-based movement	biological_process	0.21863	1	2	202	210	48611	Gh_A12G1892,Gh_A11G2403
GO:0008289	lipid binding	molecular_function	0.21876	1	3	202	386	48611	Gh_D12G1932,Gh_D05G2675,Gh_D10G1453
GO:0010556	regulation of macromolecule biosynthetic process	biological_process	0.22037	1	26	202	5306	48611	Gh_Sca005611G02,Gh_D13G1470,Gh_A05G3831,Gh_D10G2202,Gh_A11G0922,Gh_D06G0759,Gh_D09G0587,Gh_D02G0790,Gh_A08G1584,Gh_D02G2152,Gh_D10G0292,Gh_A03G0149,Gh_A09G2247,Gh_A11G2358,Gh_D07G1578,Gh_A09G0411,Gh_D02G0877,Gh_A06G0222,Gh_A12G1973,Gh_A12G0777,Gh_A03G0296,Gh_D06G0894,Gh_D03G1091,Gh_D12G2711,Gh_Sca006892G01,Gh_A11G3033
GO:0031326	regulation of cellular biosynthetic process	biological_process	0.22037	1	26	202	5306	48611	Gh_A09G0411,Gh_D02G0877,Gh_A06G0222,Gh_A12G1973,Gh_A11G2358,Gh_D07G1578,Gh_A03G0296,Gh_A12G0777,Gh_D03G1091,Gh_D12G2711,Gh_D06G0894,Gh_Sca006892G01,Gh_A11G3033,Gh_Sca005611G02,Gh_D10G2202,Gh_D13G1470,Gh_A11G0922,Gh_A05G3831,Gh_D06G0759,Gh_D09G0587,Gh_A08G1584,Gh_D02G0790,Gh_D10G0292,Gh_A09G2247,Gh_A03G0149,Gh_D02G2152
GO:0009889	regulation of biosynthetic process	biological_process	0.22094	1	26	202	5308	48611	Gh_A12G1973,Gh_A06G0222,Gh_D02G0877,Gh_A09G0411,Gh_D07G1578,Gh_A11G2358,Gh_A03G0296,Gh_A12G0777,Gh_D12G2711,Gh_D03G1091,Gh_D06G0894,Gh_A11G3033,Gh_Sca006892G01,Gh_Sca005611G02,Gh_D06G0759,Gh_D09G0587,Gh_D13G1470,Gh_D10G2202,Gh_A05G3831,Gh_A11G0922,Gh_A08G1584,Gh_D02G0790,Gh_A09G2247,Gh_A03G0149,Gh_D10G0292,Gh_D02G2152
GO:0005938	cell cortex	cellular_component	0.22169	1	2	202	212	48611	Gh_D01G1124,Gh_D03G1781
GO:0005088	Ras guanyl-nucleotide exchange factor activity	molecular_function	0.222	1	1	202	60	48611	Gh_A03G0296
GO:0005089	Rho guanyl-nucleotide exchange factor activity	molecular_function	0.222	1	1	202	60	48611	Gh_A03G0296
GO:0010181	FMN binding	molecular_function	0.222	1	1	202	60	48611	Gh_D05G3936
GO:0030976	thiamine pyrophosphate binding	molecular_function	0.222	1	1	202	60	48611	Gh_D08G0270
GO:0016209	antioxidant activity	molecular_function	0.2242	1	3	202	391	48611	Gh_D10G1880,Gh_D12G1932,Gh_A05G2374
GO:0001883	purine nucleoside binding	molecular_function	0.22489	1	36	202	7586	48611	Gh_D13G2004,Gh_D11G3196,Gh_A06G1129,Gh_A11G3033,Gh_D04G0317,Gh_A08G0670,Gh_D07G0576,Gh_A12G0777,Gh_D02G0503,Gh_A11G0922,Gh_D05G2242,Gh_A05G0978,Gh_A01G0842,Gh_D04G0583,Gh_A08G2132,Gh_A07G1240,Gh_D05G0636,Gh_A05G2854,Gh_A12G0816,Gh_A11G2358,Gh_D01G0370,Gh_A11G2663,Gh_Sca010487G02,Gh_A03G0296,Gh_A08G1584,Gh_Sca006711G02,Gh_Sca010487G03,Gh_Sca004751G01,Gh_A05G2494,Gh_A11G2403,Gh_D10G2202,Gh_A05G3831…
GO:0032549	ribonucleoside binding	molecular_function	0.22489	1	36	202	7586	48611	Gh_D11G3196,Gh_D13G2004,Gh_A11G3033,Gh_A06G1129,Gh_D04G0317,Gh_D07G0576,Gh_A12G0777,Gh_A08G0670,Gh_D05G2242,Gh_D02G0503,Gh_A11G0922,Gh_A05G0978,Gh_A01G0842,Gh_A08G2132,Gh_D04G0583,Gh_A07G1240,Gh_A12G0816,Gh_D05G0636,Gh_A05G2854,Gh_A11G2358,Gh_D01G0370,Gh_A03G0296,Gh_Sca010487G02,Gh_A11G2663,Gh_A08G1584,Gh_Sca006711G02,Gh_A05G2494,Gh_Sca010487G03,Gh_Sca004751G01,Gh_A11G2403,Gh_D09G0587,Gh_A12G1475…
GO:0032550	purine ribonucleoside binding	molecular_function	0.22489	1	36	202	7586	48611	Gh_A05G0978,Gh_D02G0503,Gh_A11G0922,Gh_D05G2242,Gh_A08G0670,Gh_D07G0576,Gh_A12G0777,Gh_D04G0317,Gh_A06G1129,Gh_A11G3033,Gh_D13G2004,Gh_D11G3196,Gh_D10G0130,Gh_D10G2202,Gh_A05G3831,Gh_D09G0587,Gh_A05G1034,Gh_A12G1475,Gh_A11G2403,Gh_Sca010487G03,Gh_Sca004751G01,Gh_A05G2494,Gh_Sca006711G02,Gh_A08G1584,Gh_A11G2663,Gh_Sca010487G02,Gh_A03G0296,Gh_A11G2358,Gh_D01G0370,Gh_A12G0816,Gh_D05G0636,Gh_A05G2854…
GO:0000394	RNA splicing, via endonucleolytic cleavage and ligation	biological_process	0.22525	1	1	202	61	48611	Gh_D10G2202
GO:0006388	tRNA splicing, via endonucleolytic cleavage and ligation	biological_process	0.22525	1	1	202	61	48611	Gh_D10G2202
GO:0006897	endocytosis	biological_process	0.22525	1	1	202	61	48611	Gh_A05G0700
GO:0015743	malate transport	biological_process	0.22525	1	1	202	61	48611	Gh_D08G1251
GO:0051715	cytolysis in other organism	biological_process	0.22525	1	1	202	61	48611	Gh_A04G1404
GO:0051171	regulation of nitrogen compound metabolic process	biological_process	0.2267	1	26	202	5328	48611	Gh_A03G0296,Gh_A12G0777,Gh_A12G1973,Gh_A06G0222,Gh_A09G0411,Gh_D02G0877,Gh_D07G1578,Gh_A11G2358,Gh_A11G3033,Gh_Sca006892G01,Gh_D12G2711,Gh_D03G1091,Gh_D06G0894,Gh_D06G0759,Gh_D09G0587,Gh_A05G3831,Gh_D13G1470,Gh_D10G2202,Gh_A11G0922,Gh_Sca005611G02,Gh_A03G0149,Gh_A09G2247,Gh_D10G0292,Gh_D02G2152,Gh_A08G1584,Gh_D02G0790
GO:0032555	purine ribonucleotide binding	molecular_function	0.22712	1	36	202	7595	48611	Gh_A05G0978,Gh_A11G0922,Gh_D02G0503,Gh_D05G2242,Gh_A08G0670,Gh_D07G0576,Gh_A12G0777,Gh_D04G0317,Gh_D11G3196,Gh_D13G2004,Gh_A06G1129,Gh_A11G3033,Gh_D10G0130,Gh_D10G2202,Gh_A05G3831,Gh_D09G0587,Gh_A12G1475,Gh_A05G1034,Gh_A05G2494,Gh_Sca010487G03,Gh_Sca004751G01,Gh_A08G1584,Gh_Sca006711G02,Gh_A11G2403,Gh_D01G0370,Gh_A11G2358,Gh_A12G0816,Gh_D05G0636,Gh_A05G2854,Gh_A11G2663,Gh_Sca010487G02,Gh_A03G0296…
GO:0032774	RNA biosynthetic process	biological_process	0.22778	1	30	202	6234	48611	Gh_Sca005611G02,Gh_A11G0922,Gh_D13G1470,Gh_D10G2202,Gh_A05G3831,Gh_D09G0587,Gh_D06G0759,Gh_D02G0790,Gh_A08G1584,Gh_D03G0729,Gh_D02G2152,Gh_D10G0292,Gh_A09G2247,Gh_A03G0149,Gh_A11G2358,Gh_D07G1578,Gh_A09G0411,Gh_D02G0877,Gh_A06G0222,Gh_A12G1973,Gh_D02G1093,Gh_A12G0777,Gh_A03G0296,Gh_D06G0894,Gh_A07G0876,Gh_D03G1091,Gh_D12G2711,Gh_Sca006892G01,Gh_D01G1124,Gh_A11G3033
GO:0006732	coenzyme metabolic process	biological_process	0.22801	1	4	202	584	48611	Gh_A07G1603,Gh_A08G0871,Gh_A09G0362,Gh_A05G3831
GO:0006072	glycerol-3-phosphate metabolic process	biological_process	0.22848	1	1	202	62	48611	Gh_A11G3033
GO:0042325	regulation of phosphorylation	biological_process	0.22848	1	1	202	62	48611	Gh_A11G0922
GO:0046168	glycerol-3-phosphate catabolic process	biological_process	0.22848	1	1	202	62	48611	Gh_A11G3033
GO:0000774	adenyl-nucleotide exchange factor activity	molecular_function	0.23171	1	1	202	63	48611	Gh_D05G2242
GO:0005669	transcription factor TFIID complex	cellular_component	0.23171	1	1	202	63	48611	Gh_A07G0876
GO:0009309	amine biosynthetic process	biological_process	0.23171	1	1	202	63	48611	Gh_A11G2358
GO:0016423	tRNA (guanine) methyltransferase activity	molecular_function	0.23171	1	1	202	63	48611	Gh_D09G0615
GO:0042401	cellular biogenic amine biosynthetic process	biological_process	0.23171	1	1	202	63	48611	Gh_A11G2358
GO:0044703	multi-organism reproductive process	biological_process	0.23187	1	3	202	398	48611	Gh_D12G1363,Gh_A05G2494,Gh_A11G2358
GO:0031325	positive regulation of cellular metabolic process	biological_process	0.23297	1	3	202	399	48611	Gh_A12G0777,Gh_A11G3033,Gh_A05G3831
GO:0001882	nucleoside binding	molecular_function	0.23312	1	36	202	7619	48611	Gh_D10G0130,Gh_D09G0587,Gh_A05G1034,Gh_A12G1475,Gh_D10G2202,Gh_A05G3831,Gh_Sca010487G03,Gh_Sca004751G01,Gh_A05G2494,Gh_Sca006711G02,Gh_A08G1584,Gh_A11G2403,Gh_A11G2358,Gh_D01G0370,Gh_D05G0636,Gh_A05G2854,Gh_A12G0816,Gh_Sca010487G02,Gh_A03G0296,Gh_A11G2663,Gh_A08G2132,Gh_D04G0583,Gh_A01G0842,Gh_A07G1240,Gh_A05G0978,Gh_D05G2242,Gh_D02G0503,Gh_A11G0922,Gh_A12G0777,Gh_D07G0576,Gh_A08G0670,Gh_D04G0317…
GO:0000990	transcription factor activity, core RNA polymerase binding	molecular_function	0.23396	1	2	202	220	48611	Gh_D02G2152,Gh_D12G2711
GO:0000996	core DNA-dependent RNA polymerase binding promoter specificity activity	molecular_function	0.23396	1	2	202	220	48611	Gh_D02G2152,Gh_D12G2711
GO:0016987	sigma factor activity	molecular_function	0.23396	1	2	202	220	48611	Gh_D02G2152,Gh_D12G2711
GO:0046906	tetrapyrrole binding	molecular_function	0.23484	1	7	202	1197	48611	Gh_A05G2246,Gh_D12G1468,Gh_D08G0085,Gh_D10G1008,Gh_Sca007622G02,Gh_Sca005362G04,Gh_D10G1880
GO:0015740	C4-dicarboxylate transport	biological_process	0.23492	1	1	202	64	48611	Gh_D08G1251
GO:0030153	bacteriocin immunity	biological_process	0.23492	1	1	202	64	48611	Gh_A11G2358
GO:0010468	regulation of gene expression	biological_process	0.23547	1	26	202	5358	48611	Gh_Sca006892G01,Gh_A11G3033,Gh_D03G1091,Gh_D12G2711,Gh_D06G0894,Gh_A03G0296,Gh_A12G0777,Gh_A09G0411,Gh_D02G0877,Gh_A06G0222,Gh_A12G1973,Gh_A11G2358,Gh_D07G1578,Gh_D10G0292,Gh_A09G2247,Gh_A03G0149,Gh_D02G2152,Gh_A08G1584,Gh_D02G0790,Gh_D13G1470,Gh_D10G2202,Gh_A11G0922,Gh_A05G3831,Gh_D09G0587,Gh_D06G0759,Gh_Sca005611G02
GO:0016820	hydrolase activity, acting on acid anhydrides, catalyzing transmembrane movement of substances	molecular_function	0.2369	1	4	202	594	48611	Gh_A05G3831,Gh_Sca010487G02,Gh_A05G0978,Gh_D04G0583
GO:0005319	lipid transporter activity	molecular_function	0.23811	1	1	202	65	48611	Gh_D12G1932
GO:0031647	regulation of protein stability	biological_process	0.23811	1	1	202	65	48611	Gh_D08G1218
GO:0044242	cellular lipid catabolic process	biological_process	0.23811	1	1	202	65	48611	Gh_A11G0922
GO:0050821	protein stabilization	biological_process	0.23811	1	1	202	65	48611	Gh_D08G1218
GO:0044264	cellular polysaccharide metabolic process	biological_process	0.23923	1	5	202	795	48611	Gh_D02G0503,Gh_D04G0317,Gh_A01G0311,Gh_D10G0130,Gh_D08G0270
GO:0016701	oxidoreductase activity, acting on single donors with incorporation of molecular oxygen	molecular_function	0.2401	1	2	202	224	48611	Gh_D04G0469,Gh_A09G2247
GO:0042157	lipoprotein metabolic process	biological_process	0.2401	1	2	202	224	48611	Gh_A11G2358,Gh_D10G1453
GO:0000272	polysaccharide catabolic process	biological_process	0.2413	1	1	202	66	48611	Gh_A11G2358
GO:0030131	clathrin adaptor complex	cellular_component	0.2413	1	1	202	66	48611	Gh_A07G1608
GO:0015988	energy coupled proton transmembrane transport, against electrochemical gradient	biological_process	0.24179	1	3	202	407	48611	Gh_A11G2358,Gh_A05G0978,Gh_Sca010487G02
GO:0015991	ATP hydrolysis coupled proton transport	biological_process	0.24179	1	3	202	407	48611	Gh_A05G0978,Gh_Sca010487G02,Gh_A11G2358
GO:0051213	dioxygenase activity	molecular_function	0.24228	1	4	202	600	48611	Gh_D02G1418,Gh_D04G0469,Gh_A08G1668,Gh_A09G2247
GO:0003918	DNA topoisomerase type II (ATP-hydrolyzing) activity	molecular_function	0.24447	1	1	202	67	48611	Gh_A05G3831
GO:0006353	DNA-templated transcription, termination	biological_process	0.24447	1	1	202	67	48611	Gh_A09G0411
GO:0008061	chitin binding	molecular_function	0.24447	1	1	202	67	48611	Gh_A09G2323
GO:0061505	DNA topoisomerase II activity	molecular_function	0.24447	1	1	202	67	48611	Gh_A05G3831
GO:0005996	monosaccharide metabolic process	biological_process	0.24472	1	2	202	227	48611	Gh_A06G0406,Gh_A11G3033
GO:0016568	chromatin modification	biological_process	0.24472	1	2	202	227	48611	Gh_A11G0922,Gh_A11G2358
GO:0019438	aromatic compound biosynthetic process	biological_process	0.24507	1	36	202	7666	48611	Gh_D06G0894,Gh_D03G1091,Gh_D12G2711,Gh_D11G0730,Gh_A11G2358,Gh_D07G1578,Gh_A09G0411,Gh_D02G0877,Gh_A01G0843,Gh_A12G1973,Gh_D02G1093,Gh_A03G0296,Gh_A06G0349,Gh_A08G1584,Gh_D02G2152,Gh_A03G0149,Gh_A09G2247,Gh_A03G0725,Gh_Sca005611G02,Gh_D10G2202,Gh_D13G1470,Gh_A05G3831,Gh_D06G0759,Gh_D09G0587,Gh_A07G0876,Gh_D12G2404,Gh_D01G1124,Gh_Sca006892G01,Gh_A11G3033,Gh_A06G0222,Gh_A12G0777,Gh_D02G0790,Gh_D03G…
GO:0033178	proton-transporting two-sector ATPase complex, catalytic domain	cellular_component	0.24626	1	2	202	228	48611	Gh_A05G0978,Gh_Sca010487G02
GO:0022414	reproductive process	biological_process	0.24734	1	3	202	412	48611	Gh_D12G1363,Gh_A05G2494,Gh_A11G2358
GO:0016010	dystrophin-associated glycoprotein complex	cellular_component	0.24762	1	1	202	68	48611	Gh_A11G2358
GO:0009056	catabolic process	biological_process	0.24821	1	11	202	2070	48611	Gh_A11G3013,Gh_A13G1907,Gh_D13G0686,Gh_A09G0362,Gh_A11G3033,Gh_A11G2358,Gh_A09G2323,Gh_A08G0871,Gh_A11G0922,Gh_A11G2663,Gh_D13G2339
GO:0006955	immune response	biological_process	0.24934	1	2	202	230	48611	Gh_A11G0922,Gh_D10G2202
GO:0006026	aminoglycan catabolic process	biological_process	0.2539	1	1	202	70	48611	Gh_A09G2323
GO:0006816	calcium ion transport	biological_process	0.2539	1	1	202	70	48611	Gh_A11G2358
GO:0031640	killing of cells of other organism	biological_process	0.2539	1	1	202	70	48611	Gh_A04G1404
GO:0044364	disruption of cells of other organism	biological_process	0.2539	1	1	202	70	48611	Gh_A04G1404
GO:0001906	cell killing	biological_process	0.25702	1	1	202	71	48611	Gh_A04G1404
GO:0007218	neuropeptide signaling pathway	biological_process	0.25702	1	1	202	71	48611	Gh_A12G0777
GO:0033865	nucleoside bisphosphate metabolic process	biological_process	0.25702	1	1	202	71	48611	Gh_A05G3831
GO:0033875	ribonucleoside bisphosphate metabolic process	biological_process	0.25702	1	1	202	71	48611	Gh_A05G3831
GO:0034032	purine nucleoside bisphosphate metabolic process	biological_process	0.25702	1	1	202	71	48611	Gh_A05G3831
GO:0044454	nuclear chromosome part	cellular_component	0.25704	1	2	202	235	48611	Gh_A05G3831,Gh_D01G2275
GO:0004536	deoxyribonuclease activity	molecular_function	0.25859	1	2	202	236	48611	Gh_D04G0317,Gh_D01G2275
GO:0006221	pyrimidine nucleotide biosynthetic process	biological_process	0.26012	1	1	202	72	48611	Gh_D10G2202
GO:0030076	light-harvesting complex	cellular_component	0.26012	1	1	202	72	48611	Gh_D13G2339
GO:0016829	lyase activity	molecular_function	0.26176	1	7	202	1240	48611	Gh_Sca011694G01,Gh_D07G1807,Gh_A01G2111,Gh_A11G3033,Gh_A11G2358,Gh_A06G0406,Gh_Sca006756G06
GO:0015980	energy derivation by oxidation of organic compounds	biological_process	0.26296	1	3	202	426	48611	Gh_D13G2339,Gh_D02G1538,Gh_D13G1464
GO:0044428	nuclear part	cellular_component	0.26578	1	10	202	1889	48611	Gh_D07G1578,Gh_A11G2358,Gh_D07G0576,Gh_D09G0587,Gh_A05G3831,Gh_A11G0922,Gh_A07G0876,Gh_D05G0705,Gh_A03G0149,Gh_D01G2275
GO:0017076	purine nucleotide binding	molecular_function	0.26607	1	36	202	7746	48611	Gh_A05G0978,Gh_D02G0503,Gh_A11G0922,Gh_D05G2242,Gh_D13G2004,Gh_D11G3196,Gh_A06G1129,Gh_A11G3033,Gh_A08G0670,Gh_A12G0777,Gh_D07G0576,Gh_D04G0317,Gh_A05G2494,Gh_Sca010487G03,Gh_Sca004751G01,Gh_A08G1584,Gh_Sca006711G02,Gh_A11G2403,Gh_D10G0130,Gh_D10G2202,Gh_A05G3831,Gh_D09G0587,Gh_A05G1034,Gh_A12G1475,Gh_D04G0583,Gh_A08G2132,Gh_A01G0842,Gh_A07G1240,Gh_A11G2358,Gh_D01G0370,Gh_D05G0636,Gh_A05G2854,Gh_…
GO:0005096	GTPase activator activity	molecular_function	0.26629	1	1	202	74	48611	Gh_D06G1866
GO:0005635	nuclear envelope	cellular_component	0.26629	1	2	202	241	48611	Gh_D05G0705,Gh_A05G3831
GO:0008202	steroid metabolic process	biological_process	0.26629	1	2	202	241	48611	Gh_A01G0311,Gh_D06G0041
GO:0044265	cellular macromolecule catabolic process	biological_process	0.26862	1	4	202	629	48611	Gh_D13G2339,Gh_A11G2663,Gh_D13G0686,Gh_A11G3013
GO:0000096	sulfur amino acid metabolic process	biological_process	0.26936	1	1	202	75	48611	Gh_D13G2069
GO:0004177	aminopeptidase activity	molecular_function	0.26936	1	1	202	75	48611	Gh_A13G1907
GO:0016798	hydrolase activity, acting on glycosyl bonds	molecular_function	0.26948	1	8	202	1465	48611	Gh_A11G0922,Gh_D08G0270,Gh_A08G0871,Gh_A09G2323,Gh_A11G2358,Gh_D06G0902,Gh_A08G1584,Gh_D05G0815
GO:0009893	positive regulation of metabolic process	biological_process	0.2697	1	3	202	432	48611	Gh_A05G3831,Gh_A11G3033,Gh_A12G0777
GO:0030234	enzyme regulator activity	molecular_function	0.27057	1	6	202	1043	48611	Gh_D10G2220,Gh_D05G2242,Gh_A07G1603,Gh_A11G2358,Gh_A07G1608,Gh_D06G1866
GO:0016247	channel regulator activity	molecular_function	0.27092	1	2	202	244	48611	Gh_A07G1608,Gh_A11G2358
GO:0030119	AP-type membrane coat adaptor complex	cellular_component	0.27241	1	1	202	76	48611	Gh_A07G1608
GO:0018130	heterocycle biosynthetic process	biological_process	0.27252	1	36	202	7770	48611	Gh_D07G1578,Gh_D11G0730,Gh_A11G2358,Gh_A12G1973,Gh_D02G0877,Gh_A09G0411,Gh_A01G0843,Gh_D02G1093,Gh_A06G0349,Gh_A03G0296,Gh_D06G0894,Gh_D12G2711,Gh_D03G1091,Gh_Sca005611G02,Gh_A03G0725,Gh_D06G0759,Gh_D09G0587,Gh_D10G2202,Gh_D13G1470,Gh_A05G3831,Gh_A08G1584,Gh_D02G2152,Gh_A03G0149,Gh_A09G2247,Gh_A06G0222,Gh_A12G0777,Gh_A07G0876,Gh_D12G2404,Gh_A11G3033,Gh_D01G1124,Gh_Sca006892G01,Gh_A11G0922,Gh_D02G…
GO:0005246	calcium channel regulator activity	molecular_function	0.27545	1	1	202	77	48611	Gh_A11G2358
GO:0005875	microtubule associated complex	cellular_component	0.27545	1	1	202	77	48611	Gh_A12G1892
GO:0009628	response to abiotic stimulus	biological_process	0.27545	1	1	202	77	48611	Gh_D11G1826
GO:0031984	organelle subcompartment	cellular_component	0.27545	1	1	202	77	48611	Gh_A11G2358
GO:0098791	Golgi subcompartment	cellular_component	0.27545	1	1	202	77	48611	Gh_A11G2358
GO:0005886	plasma membrane	cellular_component	0.2769	1	4	202	638	48611	Gh_D04G0317,Gh_D10G2202,Gh_D08G1251,Gh_A11G2358
GO:0005217	intracellular ligand-gated ion channel activity	molecular_function	0.27848	1	1	202	78	48611	Gh_D02G1649
GO:0005218	intracellular ligand-gated calcium channel activity	molecular_function	0.27848	1	1	202	78	48611	Gh_D02G1649
GO:0005219	ryanodine-sensitive calcium-release channel activity	molecular_function	0.27848	1	1	202	78	48611	Gh_D02G1649
GO:0006874	cellular calcium ion homeostasis	biological_process	0.27848	1	1	202	78	48611	Gh_D02G1649
GO:0015278	calcium-release channel activity	molecular_function	0.27848	1	1	202	78	48611	Gh_D02G1649
GO:0016972	thiol oxidase activity	molecular_function	0.27848	1	1	202	78	48611	Gh_A11G2358
GO:0019069	viral capsid assembly	biological_process	0.27848	1	1	202	78	48611	Gh_D04G0583
GO:0019220	regulation of phosphate metabolic process	biological_process	0.27848	1	1	202	78	48611	Gh_A11G0922
GO:0051174	regulation of phosphorus metabolic process	biological_process	0.27848	1	1	202	78	48611	Gh_A11G0922
GO:0055074	calcium ion homeostasis	biological_process	0.27848	1	1	202	78	48611	Gh_D02G1649
GO:0072503	cellular divalent inorganic cation homeostasis	biological_process	0.27848	1	1	202	78	48611	Gh_D02G1649
GO:0072507	divalent inorganic cation homeostasis	biological_process	0.27848	1	1	202	78	48611	Gh_D02G1649
GO:0016614	oxidoreductase activity, acting on CH-OH group of donors	molecular_function	0.28003	1	5	202	847	48611	Gh_D05G1075,Gh_A11G3033,Gh_A01G0311,Gh_D06G0041,Gh_A07G1603
GO:0080090	regulation of primary metabolic process	biological_process	0.28025	1	26	202	5504	48611	Gh_D06G0894,Gh_D03G1091,Gh_D12G2711,Gh_Sca006892G01,Gh_A11G3033,Gh_A11G2358,Gh_D07G1578,Gh_A09G0411,Gh_D02G0877,Gh_A06G0222,Gh_A12G1973,Gh_A12G0777,Gh_A03G0296,Gh_D02G0790,Gh_A08G1584,Gh_D02G2152,Gh_D10G0292,Gh_A09G2247,Gh_A03G0149,Gh_Sca005611G02,Gh_A11G0922,Gh_D13G1470,Gh_D10G2202,Gh_A05G3831,Gh_D09G0587,Gh_D06G0759
GO:0006904	vesicle docking involved in exocytosis	biological_process	0.28149	1	1	202	79	48611	Gh_D03G1781
GO:0016278	lysine N-methyltransferase activity	molecular_function	0.28149	1	1	202	79	48611	Gh_A12G1973
GO:0016279	protein-lysine N-methyltransferase activity	molecular_function	0.28149	1	1	202	79	48611	Gh_A12G1973
GO:0018024	histone-lysine N-methyltransferase activity	molecular_function	0.28149	1	1	202	79	48611	Gh_A12G1973
GO:0042054	histone methyltransferase activity	molecular_function	0.28149	1	1	202	79	48611	Gh_A12G1973
GO:0022890	inorganic cation transmembrane transporter activity	molecular_function	0.28194	1	12	202	2359	48611	Gh_D11G0730,Gh_A11G2358,Gh_A01G0843,Gh_A03G0725,Gh_A12G0777,Gh_A06G0349,Gh_A11G0922,Gh_A05G3831,Gh_D07G1209,Gh_D02G1649,Gh_D12G2404,Gh_A11G3033
GO:0044712	single-organism catabolic process	biological_process	0.2843	1	4	202	646	48611	Gh_A08G0871,Gh_A13G1907,Gh_A11G0922,Gh_A09G0362
GO:0006220	pyrimidine nucleotide metabolic process	biological_process	0.2845	1	1	202	80	48611	Gh_D10G2202
GO:0017119	Golgi transport complex	cellular_component	0.2845	1	1	202	80	48611	Gh_D13G0686
GO:0060255	regulation of macromolecule metabolic process	biological_process	0.28728	1	26	202	5526	48611	Gh_Sca005611G02,Gh_D06G0759,Gh_D09G0587,Gh_D13G1470,Gh_D10G2202,Gh_A05G3831,Gh_A11G0922,Gh_A08G1584,Gh_D02G0790,Gh_A09G2247,Gh_A03G0149,Gh_D10G0292,Gh_D02G2152,Gh_A12G1973,Gh_A06G0222,Gh_A09G0411,Gh_D02G0877,Gh_D07G1578,Gh_A11G2358,Gh_A03G0296,Gh_A12G0777,Gh_D12G2711,Gh_D03G1091,Gh_D06G0894,Gh_A11G3033,Gh_Sca006892G01
GO:0008408	3'-5' exonuclease activity	molecular_function	0.28749	1	1	202	81	48611	Gh_D10G2202
GO:0017111	nucleoside-triphosphatase activity	molecular_function	0.28945	1	14	202	2819	48611	Gh_A05G0716,Gh_A07G1240,Gh_A11G2403,Gh_D11G3196,Gh_Sca010487G03,Gh_D04G0583,Gh_Sca004751G01,Gh_D04G0317,Gh_Sca010487G02,Gh_D10G2202,Gh_A11G2663,Gh_A05G3831,Gh_A11G0922,Gh_A11G2358
GO:0071944	cell periphery	cellular_component	0.28951	1	7	202	1283	48611	Gh_D04G0317,Gh_D01G1124,Gh_D10G2202,Gh_D08G1251,Gh_D08G0270,Gh_D03G1781,Gh_A11G2358
GO:0016762	xyloglucan:xyloglucosyl transferase activity	molecular_function	0.29047	1	1	202	82	48611	Gh_D08G0270
GO:0048046	apoplast	cellular_component	0.29047	1	1	202	82	48611	Gh_D08G0270
GO:0016818	hydrolase activity, acting on acid anhydrides, in phosphorus-containing anhydrides	molecular_function	0.2906	1	15	202	3045	48611	Gh_D04G0317,Gh_Sca010487G02,Gh_A11G2663,Gh_D10G2202,Gh_A05G3831,Gh_A11G0922,Gh_A11G2358,Gh_A07G1240,Gh_A05G0716,Gh_A11G2403,Gh_A08G1584,Gh_D11G3196,Gh_Sca004751G01,Gh_Sca010487G03,Gh_D04G0583
GO:0016817	hydrolase activity, acting on acid anhydrides	molecular_function	0.29099	1	16	202	3270	48611	Gh_A05G0716,Gh_A11G2403,Gh_Sca010487G03,Gh_Sca004751G01,Gh_A08G1584,Gh_A05G0978,Gh_D10G2202,Gh_A11G0922,Gh_A05G3831,Gh_A07G1240,Gh_D04G0583,Gh_D11G3196,Gh_D04G0317,Gh_Sca010487G02,Gh_A11G2663,Gh_A11G2358
GO:0004252	serine-type endopeptidase activity	molecular_function	0.29114	1	3	202	451	48611	Gh_A05G2246,Gh_A03G2036,Gh_D10G2202
GO:0006835	dicarboxylic acid transport	biological_process	0.29343	1	1	202	83	48611	Gh_D08G1251
GO:0015643	toxic substance binding	molecular_function	0.29343	1	1	202	83	48611	Gh_A11G2358
GO:0016670	oxidoreductase activity, acting on a sulfur group of donors, oxygen as acceptor	molecular_function	0.29343	1	1	202	83	48611	Gh_A11G2358
GO:0006928	movement of cell or subcellular component	biological_process	0.29454	1	3	202	454	48611	Gh_A11G2403,Gh_A11G2358,Gh_A12G1892
GO:0006576	cellular biogenic amine metabolic process	biological_process	0.29556	1	2	202	260	48611	Gh_A11G2358,Gh_A05G3831
GO:0016055	Wnt signaling pathway	biological_process	0.29638	1	1	202	84	48611	Gh_D02G1619
GO:0046434	organophosphate catabolic process	biological_process	0.29638	1	1	202	84	48611	Gh_A11G3033
GO:0044106	cellular amine metabolic process	biological_process	0.2971	1	2	202	261	48611	Gh_A11G2358,Gh_A05G3831
GO:0008378	galactosyltransferase activity	molecular_function	0.29933	1	1	202	85	48611	Gh_A11G2358
GO:0006030	chitin metabolic process	biological_process	0.30225	1	1	202	86	48611	Gh_A09G2323
GO:0006839	mitochondrial transport	biological_process	0.30225	1	1	202	86	48611	Gh_D13G0686
GO:1901071	glucosamine-containing compound metabolic process	biological_process	0.30225	1	1	202	86	48611	Gh_A09G2323
GO:0000003	reproduction	biological_process	0.30248	1	3	202	461	48611	Gh_A11G2358,Gh_A05G2494,Gh_D12G1363
GO:0006399	tRNA metabolic process	biological_process	0.30256	1	5	202	875	48611	Gh_A01G1083,Gh_A09G0411,Gh_A11G2358,Gh_D10G2202,Gh_D09G0615
GO:0010035	response to inorganic substance	biological_process	0.30807	1	1	202	88	48611	Gh_D11G1826
GO:0016682	oxidoreductase activity, acting on diphenols and related substances as donors, oxygen as acceptor	molecular_function	0.30807	1	1	202	88	48611	Gh_A04G0970
GO:0052646	alditol phosphate metabolic process	biological_process	0.30807	1	1	202	88	48611	Gh_A11G3033
GO:0044723	single-organism carbohydrate metabolic process	biological_process	0.3102	1	9	202	1752	48611	Gh_A09G0362,Gh_A11G3033,Gh_A01G0311,Gh_D10G0130,Gh_D05G2242,Gh_D04G0317,Gh_D02G0503,Gh_A08G0871,Gh_A06G0406
GO:0031323	regulation of cellular metabolic process	biological_process	0.31071	1	26	202	5598	48611	Gh_Sca005611G02,Gh_D09G0587,Gh_D06G0759,Gh_D13G1470,Gh_A05G3831,Gh_D10G2202,Gh_A11G0922,Gh_D02G0790,Gh_A08G1584,Gh_D02G2152,Gh_A03G0149,Gh_A09G2247,Gh_D10G0292,Gh_D07G1578,Gh_A11G2358,Gh_A12G1973,Gh_A06G0222,Gh_D02G0877,Gh_A09G0411,Gh_A12G0777,Gh_A03G0296,Gh_D06G0894,Gh_D12G2711,Gh_D03G1091,Gh_A11G3033,Gh_Sca006892G01
GO:0022857	transmembrane transporter activity	molecular_function	0.31247	1	19	202	4002	48611	Gh_A05G2494,Gh_D07G1209,Gh_D02G1620,Gh_A03G0725,Gh_A05G0978,Gh_A11G0922,Gh_A05G3831,Gh_D04G0583,Gh_A07G1608,Gh_D02G1649,Gh_D13G0686,Gh_D12G2404,Gh_A11G3033,Gh_D11G0730,Gh_A11G2358,Gh_A01G0843,Gh_A12G0777,Gh_A06G0349,Gh_Sca010487G02
GO:0008608	attachment of spindle microtubules to kinetochore	biological_process	0.31385	1	1	202	90	48611	Gh_A05G3831
GO:0009036	Type II site-specific deoxyribonuclease activity	molecular_function	0.31385	1	1	202	90	48611	Gh_D04G0317
GO:0015666	restriction endodeoxyribonuclease activity	molecular_function	0.31385	1	1	202	90	48611	Gh_D04G0317
GO:0016840	carbon-nitrogen lyase activity	molecular_function	0.31385	1	1	202	90	48611	Gh_A06G0406
GO:0030031	cell projection assembly	biological_process	0.31385	1	1	202	90	48611	Gh_A11G3033
GO:0016462	pyrophosphatase activity	molecular_function	0.31675	1	14	202	2880	48611	Gh_A05G0716,Gh_A07G1240,Gh_A11G2403,Gh_D04G0583,Gh_Sca010487G03,Gh_Sca004751G01,Gh_D11G3196,Gh_D04G0317,Gh_Sca010487G02,Gh_D10G2202,Gh_A11G0922,Gh_A11G2663,Gh_A05G3831,Gh_A11G2358
GO:0050794	regulation of cellular process	biological_process	0.31856	1	39	202	8633	48611	Gh_Sca006892G01,Gh_A11G3033,Gh_A11G2238,Gh_D02G0146,Gh_A06G0222,Gh_A12G0777,Gh_A11G3013,Gh_D02G0790,Gh_D10G0292,Gh_D10G1453,Gh_D02G1619,Gh_D08G0270,Gh_A11G0922,Gh_D06G0894,Gh_D03G1091,Gh_D12G2711,Gh_D09G0593,Gh_D11G0730,Gh_A11G2358,Gh_D07G1578,Gh_D13G1348,Gh_A09G0411,Gh_D06G1866,Gh_D02G0877,Gh_A12G1973,Gh_D10G2261,Gh_A03G0296,Gh_D05G2734,Gh_A08G1584,Gh_D02G2152,Gh_A07G1965,Gh_A09G2247,Gh_A03G0149…
GO:0006352	DNA-templated transcription, initiation	biological_process	0.31953	1	3	202	476	48611	Gh_A07G0876,Gh_D12G2711,Gh_D02G2152
GO:0019842	vitamin binding	molecular_function	0.31957	1	1	202	92	48611	Gh_D08G0270
GO:0016788	hydrolase activity, acting on ester bonds	molecular_function	0.32264	1	15	202	3119	48611	Gh_A11G2358,Gh_D07G0510,Gh_A01G0843,Gh_D08G0270,Gh_A12G0777,Gh_A05G3831,Gh_D10G2202,Gh_A11G0922,Gh_D04G0317,Gh_Sca010487G03,Gh_A13G1907,Gh_D05G1158,Gh_D13G0686,Gh_D01G2275,Gh_D04G0576
GO:0044255	cellular lipid metabolic process	biological_process	0.32289	1	9	202	1774	48611	Gh_D13G0686,Gh_A03G2022,Gh_D10G0130,Gh_D08G0270,Gh_A11G0922,Gh_D05G1075,Gh_D02G0503,Gh_A11G2358,Gh_A07G1603
GO:0009307	DNA restriction-modification system	biological_process	0.32525	1	1	202	94	48611	Gh_D04G0317
GO:0009404	toxin metabolic process	biological_process	0.32525	1	1	202	94	48611	Gh_A11G2358
GO:0044355	clearance of foreign intracellular DNA	biological_process	0.32525	1	1	202	94	48611	Gh_D04G0317
GO:0000228	nuclear chromosome	cellular_component	0.32618	1	2	202	280	48611	Gh_A05G3831,Gh_D01G2275
GO:0005184	neuropeptide hormone activity	molecular_function	0.32807	1	1	202	95	48611	Gh_A12G0777
GO:0015996	chlorophyll catabolic process	biological_process	0.32807	1	1	202	95	48611	Gh_A13G1907
GO:0043161	proteasome-mediated ubiquitin-dependent protein catabolic process	biological_process	0.32807	1	1	202	95	48611	Gh_D13G0686
GO:0047746	chlorophyllase activity	molecular_function	0.32807	1	1	202	95	48611	Gh_A13G1907
GO:0006979	response to oxidative stress	biological_process	0.32923	1	2	202	282	48611	Gh_A05G2374,Gh_D10G1880
GO:0005524	ATP binding	molecular_function	0.33097	1	31	202	6816	48611	Gh_A08G2132,Gh_D04G0583,Gh_A01G0842,Gh_D13G2004,Gh_A07G1240,Gh_A06G1129,Gh_A11G2358,Gh_D01G0370,Gh_A05G2854,Gh_A12G0816,Gh_A08G0670,Gh_Sca010487G02,Gh_D04G0317,Gh_A03G0296,Gh_A11G2663,Gh_Sca010487G03,Gh_Sca004751G01,Gh_A05G2494,Gh_Sca006711G02,Gh_A08G1584,Gh_A11G2403,Gh_D10G0130,Gh_A05G0978,Gh_D09G0587,Gh_D05G2242,Gh_A12G1475,Gh_A05G1034,Gh_D02G0503,Gh_D10G2202,Gh_A05G3831,Gh_A11G0922
GO:0020037	heme binding	molecular_function	0.33198	1	6	202	1128	48611	Gh_D10G1880,Gh_Sca007622G02,Gh_D10G1008,Gh_D08G0085,Gh_A05G2246,Gh_D12G1468
GO:0008234	cysteine-type peptidase activity	molecular_function	0.33204	1	3	202	487	48611	Gh_A05G3831,Gh_A05G2494,Gh_A11G2358
GO:0007610	behavior	biological_process	0.33368	1	1	202	97	48611	Gh_D11G0730
GO:0015849	organic acid transport	biological_process	0.33379	1	2	202	285	48611	Gh_D13G0686,Gh_D08G1251
GO:0046942	carboxylic acid transport	biological_process	0.33379	1	2	202	285	48611	Gh_D13G0686,Gh_D08G1251
GO:0098797	plasma membrane protein complex	cellular_component	0.33379	1	2	202	285	48611	Gh_D04G0317,Gh_A11G2358
GO:0033692	cellular polysaccharide biosynthetic process	biological_process	0.3339	1	4	202	699	48611	Gh_D04G0317,Gh_D02G0503,Gh_A01G0311,Gh_D10G0130
GO:0051186	cofactor metabolic process	biological_process	0.33492	1	6	202	1132	48611	Gh_A13G1907,Gh_A07G1603,Gh_A08G0871,Gh_A09G0362,Gh_D12G2422,Gh_A05G3831
GO:0016667	oxidoreductase activity, acting on a sulfur group of donors	molecular_function	0.33545	1	3	202	490	48611	Gh_A11G2358,Gh_D06G0894,Gh_D10G1453
GO:0004970	ionotropic glutamate receptor activity	molecular_function	0.33646	1	1	202	98	48611	Gh_A07G1608
GO:0005231	excitatory extracellular ligand-gated ion channel activity	molecular_function	0.33646	1	1	202	98	48611	Gh_A07G1608
GO:0005234	extracellular-glutamate-gated ion channel activity	molecular_function	0.33646	1	1	202	98	48611	Gh_A07G1608
GO:0008066	glutamate receptor activity	molecular_function	0.33646	1	1	202	98	48611	Gh_A07G1608
GO:0010498	proteasomal protein catabolic process	biological_process	0.33646	1	1	202	98	48611	Gh_D13G0686
GO:0019207	kinase regulator activity	molecular_function	0.33646	1	1	202	98	48611	Gh_A07G1603
GO:0019887	protein kinase regulator activity	molecular_function	0.33646	1	1	202	98	48611	Gh_A07G1603
GO:0046149	pigment catabolic process	biological_process	0.33646	1	1	202	98	48611	Gh_A13G1907
GO:0004518	nuclease activity	molecular_function	0.33802	1	7	202	1356	48611	Gh_D05G1158,Gh_A11G2358,Gh_D10G2202,Gh_D04G0317,Gh_D01G2275,Gh_D08G0270,Gh_A12G0777
GO:0043229	intracellular organelle	cellular_component	0.34045	1	43	202	9647	48611	Gh_D09G0269,Gh_A05G3831,Gh_D13G1470,Gh_D09G0587,Gh_A01G1126,Gh_D02G2152,Gh_D04G0469,Gh_D01G2275,Gh_A05G0716,Gh_A03G0149,Gh_A08G1584,Gh_A01G2111,Gh_A06G0349,Gh_D13G2339,Gh_D11G0730,Gh_A11G2358,Gh_D07G1578,Gh_A12G0816,Gh_D02G0877,Gh_A01G0843,Gh_A05G2854,Gh_A05G0713,Gh_D03G1781,Gh_D03G1091,Gh_D12G2711,Gh_A11G0922,Gh_D08G0567,Gh_A05G2374,Gh_D10G0292,Gh_D05G0705,Gh_D08G1212,Gh_A12G0777,Gh_D07G0576,Gh_…
GO:1903509	liposaccharide metabolic process	biological_process	0.3405	1	4	202	706	48611	Gh_A11G0922,Gh_D02G0503,Gh_D10G0130,Gh_A11G2358
GO:0006873	cellular ion homeostasis	biological_process	0.342	1	1	202	100	48611	Gh_D02G1649
GO:0006875	cellular metal ion homeostasis	biological_process	0.342	1	1	202	100	48611	Gh_D02G1649
GO:0008831	dTDP-4-dehydrorhamnose reductase activity	molecular_function	0.342	1	1	202	100	48611	Gh_A01G0311
GO:0030003	cellular cation homeostasis	biological_process	0.342	1	1	202	100	48611	Gh_D02G1649
GO:0015630	microtubule cytoskeleton	cellular_component	0.34289	1	2	202	291	48611	Gh_A12G1892,Gh_A05G3831
GO:0008652	cellular amino acid biosynthetic process	biological_process	0.34454	1	3	202	498	48611	Gh_A05G0700,Gh_D12G2422,Gh_D13G2069
GO:0005262	calcium channel activity	molecular_function	0.34475	1	1	202	101	48611	Gh_D02G1649
GO:0008175	tRNA methyltransferase activity	molecular_function	0.34475	1	1	202	101	48611	Gh_D09G0615
GO:0007017	microtubule-based process	biological_process	0.34681	1	3	202	500	48611	Gh_A12G1892,Gh_A11G2403,Gh_A05G3831
GO:0030118	clathrin coat	cellular_component	0.34749	1	1	202	102	48611	Gh_A07G1608
GO:0034453	microtubule anchoring	biological_process	0.34749	1	1	202	102	48611	Gh_A05G3831
GO:0055065	metal ion homeostasis	biological_process	0.34749	1	1	202	102	48611	Gh_D02G1649
GO:0022892	substrate-specific transporter activity	molecular_function	0.34942	1	16	202	3408	48611	Gh_A06G0349,Gh_A12G0777,Gh_A01G0843,Gh_A11G2358,Gh_D11G0730,Gh_A11G3033,Gh_D12G2404,Gh_D02G1649,Gh_A07G1608,Gh_D12G1932,Gh_A11G0922,Gh_A05G3831,Gh_D05G2242,Gh_A03G0725,Gh_A05G2494,Gh_D07G1209
GO:0009069	serine family amino acid metabolic process	biological_process	0.35022	1	1	202	103	48611	Gh_D13G2069
GO:0015711	organic anion transport	biological_process	0.35043	1	2	202	296	48611	Gh_D13G0686,Gh_D08G1251
GO:0065007	biological regulation	biological_process	0.35099	1	42	202	9451	48611	Gh_A07G1965,Gh_D02G2152,Gh_A09G2247,Gh_A03G0149,Gh_A08G1584,Gh_D13G1470,Gh_D10G2202,Gh_A05G3831,Gh_D09G0587,Gh_D06G0759,Gh_Sca005611G02,Gh_D02G1649,Gh_A04G1404,Gh_D06G0894,Gh_D03G1091,Gh_D09G0593,Gh_D12G2711,Gh_D10G2261,Gh_A03G0296,Gh_D05G2734,Gh_A11G2358,Gh_D11G0730,Gh_D07G1578,Gh_D06G1866,Gh_D13G1348,Gh_A09G0411,Gh_D02G0877,Gh_A12G1973,Gh_D10G0292,Gh_D10G1453,Gh_D02G0790,Gh_A11G3013,Gh_D08G0270…
GO:0006400	tRNA modification	biological_process	0.35294	1	1	202	104	48611	Gh_D09G0615
GO:0006787	porphyrin-containing compound catabolic process	biological_process	0.35294	1	1	202	104	48611	Gh_A13G1907
GO:0015085	calcium ion transmembrane transporter activity	molecular_function	0.35294	1	1	202	104	48611	Gh_D02G1649
GO:0019354	siroheme biosynthetic process	biological_process	0.35294	1	1	202	104	48611	Gh_D12G2422
GO:0030030	cell projection organization	biological_process	0.35294	1	1	202	104	48611	Gh_A11G3033
GO:0033015	tetrapyrrole catabolic process	biological_process	0.35294	1	1	202	104	48611	Gh_A13G1907
GO:0043115	precorrin-2 dehydrogenase activity	molecular_function	0.35294	1	1	202	104	48611	Gh_D12G2422
GO:0046156	siroheme metabolic process	biological_process	0.35294	1	1	202	104	48611	Gh_D12G2422
GO:0051056	regulation of small GTPase mediated signal transduction	biological_process	0.35294	1	1	202	104	48611	Gh_D06G1866
GO:0072686	mitotic spindle	cellular_component	0.35294	1	1	202	104	48611	Gh_A05G3831
GO:0015297	antiporter activity	molecular_function	0.35345	1	2	202	298	48611	Gh_D13G0686,Gh_D02G1620
GO:0098772	molecular function regulator	molecular_function	0.35491	1	7	202	1381	48611	Gh_A11G2358,Gh_A07G1603,Gh_A07G1608,Gh_D06G1866,Gh_D10G2220,Gh_D05G2242,Gh_A03G0296
GO:0004616	phosphogluconate dehydrogenase (decarboxylating) activity	molecular_function	0.35564	1	1	202	105	48611	Gh_A07G1603
GO:0005337	nucleoside transmembrane transporter activity	molecular_function	0.35564	1	1	202	105	48611	Gh_A05G2494
GO:0055082	cellular chemical homeostasis	biological_process	0.35564	1	1	202	105	48611	Gh_D02G1649
GO:0003682	chromatin binding	molecular_function	0.35823	1	5	202	943	48611	Gh_A10G0190,Gh_D02G0291,Gh_D12G2711,Gh_A11G2177,Gh_A11G2358
GO:0005230	extracellular ligand-gated ion channel activity	molecular_function	0.35834	1	1	202	106	48611	Gh_A07G1608
GO:0004221	obsolete ubiquitin thiolesterase activity	molecular_function	0.36102	1	1	202	107	48611	Gh_A11G3013
GO:0043648	dicarboxylic acid metabolic process	biological_process	0.36102	1	1	202	107	48611	Gh_D12G2422
GO:0051187	cofactor catabolic process	biological_process	0.36102	1	1	202	107	48611	Gh_A13G1907
GO:0045226	extracellular polysaccharide biosynthetic process	biological_process	0.36369	1	1	202	108	48611	Gh_A01G0311
GO:0046379	extracellular polysaccharide metabolic process	biological_process	0.36369	1	1	202	108	48611	Gh_A01G0311
GO:0050801	ion homeostasis	biological_process	0.36369	1	1	202	108	48611	Gh_D02G1649
GO:0055080	cation homeostasis	biological_process	0.36369	1	1	202	108	48611	Gh_D02G1649
GO:0098771	inorganic ion homeostasis	biological_process	0.36369	1	1	202	108	48611	Gh_D02G1649
GO:0032787	monocarboxylic acid metabolic process	biological_process	0.36597	1	4	202	733	48611	Gh_D13G0686,Gh_A09G0362,Gh_A07G1603,Gh_A08G0871
GO:0009236	cobalamin biosynthetic process	biological_process	0.36635	1	1	202	109	48611	Gh_D12G2711
GO:0043531	ADP binding	molecular_function	0.36835	1	3	202	519	48611	Gh_A11G2358,Gh_Sca010487G03,Gh_A05G3831
GO:0043226	organelle	cellular_component	0.36967	1	43	202	9753	48611	Gh_A11G2238,Gh_D07G0576,Gh_A12G0777,Gh_D08G1212,Gh_D04G0317,Gh_A12G1892,Gh_D02G1538,Gh_D05G1158,Gh_D11G3196,Gh_A07G0876,Gh_D13G0686,Gh_D12G2404,Gh_A11G3033,Gh_A05G2374,Gh_A11G0922,Gh_D08G0567,Gh_D05G0705,Gh_D10G0292,Gh_D07G1578,Gh_A11G2358,Gh_D11G0730,Gh_A05G0713,Gh_D03G1781,Gh_A05G2854,Gh_D02G0877,Gh_A12G0816,Gh_A01G0843,Gh_D13G2339,Gh_A06G0349,Gh_A01G2111,Gh_D12G2711,Gh_D03G1091,Gh_A01G1126,Gh_…
GO:0006325	chromatin organization	biological_process	0.36992	1	2	202	309	48611	Gh_A11G2358,Gh_A11G0922
GO:0000271	polysaccharide biosynthetic process	biological_process	0.37163	1	4	202	739	48611	Gh_A01G0311,Gh_D10G0130,Gh_D04G0317,Gh_D02G0503
GO:0006040	amino sugar metabolic process	biological_process	0.37164	1	1	202	111	48611	Gh_A09G2323
GO:0006289	nucleotide-excision repair	biological_process	0.37164	1	1	202	111	48611	Gh_D13G0686
GO:0016740	transferase activity	molecular_function	0.37226	1	48	202	10940	48611	Gh_A03G0149,Gh_D02G2152,Gh_A09G0362,Gh_Sca006711G02,Gh_A05G2494,Gh_A10G0578,Gh_D13G1470,Gh_D10G2202,Gh_A05G3831,Gh_D09G0587,Gh_A05G1034,Gh_A12G1475,Gh_A08G1668,Gh_D10G0130,Gh_A03G0885,Gh_D06G1600,Gh_D13G2069,Gh_A08G1015,Gh_D09G0615,Gh_D06G0902,Gh_A07G1608,Gh_D09G0593,Gh_A01G0842,Gh_D04G0583,Gh_A03G2022,Gh_A08G2132,Gh_A03G0296,Gh_D02G1093,Gh_D06G1866,Gh_A09G0411,Gh_A05G2854,Gh_A12G1973,Gh_A11G2358…
GO:0008146	sulfotransferase activity	molecular_function	0.37427	1	1	202	112	48611	Gh_A10G0578
GO:0032559	adenyl ribonucleotide binding	molecular_function	0.37585	1	31	202	6958	48611	Gh_D02G0503,Gh_D10G2202,Gh_A05G3831,Gh_A11G0922,Gh_D05G2242,Gh_D09G0587,Gh_A05G1034,Gh_A12G1475,Gh_A05G0978,Gh_D10G0130,Gh_Sca006711G02,Gh_A08G1584,Gh_A05G2494,Gh_Sca010487G03,Gh_Sca004751G01,Gh_A11G2403,Gh_A05G2854,Gh_A12G0816,Gh_A11G2358,Gh_D01G0370,Gh_A11G2663,Gh_D04G0317,Gh_Sca010487G02,Gh_A03G0296,Gh_A08G0670,Gh_D13G2004,Gh_A01G0842,Gh_D04G0583,Gh_A08G2132,Gh_A06G1129,Gh_A07G1240
GO:0019835	cytolysis	biological_process	0.37688	1	1	202	113	48611	Gh_A04G1404
GO:0030695	GTPase regulator activity	molecular_function	0.37688	1	1	202	113	48611	Gh_D06G1866
GO:0044248	cellular catabolic process	biological_process	0.37931	1	8	202	1643	48611	Gh_A11G3013,Gh_A13G1907,Gh_D13G0686,Gh_A09G2323,Gh_A11G2358,Gh_A11G2663,Gh_A11G0922,Gh_D13G2339
GO:0005516	calmodulin binding	molecular_function	0.37949	1	1	202	114	48611	Gh_D07G1209
GO:0016151	nickel cation binding	molecular_function	0.37949	1	1	202	114	48611	Gh_D13G0686
GO:0016638	oxidoreductase activity, acting on the CH-NH2 group of donors	molecular_function	0.37949	1	1	202	114	48611	Gh_D12G2422
GO:0016887	ATPase activity	molecular_function	0.38057	1	8	202	1645	48611	Gh_A07G1240,Gh_Sca004751G01,Gh_D04G0583,Gh_Sca010487G03,Gh_D10G2202,Gh_A05G3831,Gh_D04G0317,Gh_Sca010487G02
GO:0000723	telomere maintenance	biological_process	0.38209	1	1	202	115	48611	Gh_A11G2358
GO:0032200	telomere organization	biological_process	0.38209	1	1	202	115	48611	Gh_A11G2358
GO:0060249	anatomical structure homeostasis	biological_process	0.38209	1	1	202	115	48611	Gh_A11G2358
GO:1902589	single-organism organelle organization	biological_process	0.3838	1	5	202	974	48611	Gh_A11G2358,Gh_A11G3033,Gh_A05G0716,Gh_A05G3831,Gh_A05G0700
GO:0008081	phosphoric diester hydrolase activity	molecular_function	0.38467	1	1	202	116	48611	Gh_D13G0686
GO:0016705	oxidoreductase activity, acting on paired donors, with incorporation or reduction of molecular oxygen	molecular_function	0.3855	1	7	202	1426	48611	Gh_D08G0085,Gh_A05G2246,Gh_D12G1468,Gh_D10G1008,Gh_D02G1418,Gh_A08G1668,Gh_D05G1075
GO:0006073	cellular glucan metabolic process	biological_process	0.38623	1	2	202	320	48611	Gh_D04G0317,Gh_D08G0270
GO:0044042	glucan metabolic process	biological_process	0.38623	1	2	202	320	48611	Gh_D08G0270,Gh_D04G0317
GO:0005267	potassium channel activity	molecular_function	0.38724	1	1	202	117	48611	Gh_D07G1209
GO:0009235	cobalamin metabolic process	biological_process	0.38724	1	1	202	117	48611	Gh_D12G2711
GO:1901363	heterocyclic compound binding	molecular_function	0.38953	1	76	202	17645	48611	Gh_D10G1880,Gh_D02G2152,Gh_A08G1584,Gh_A05G2246,Gh_A05G2494,Gh_A05G1034,Gh_Sca007622G02,Gh_D13G1470,Gh_A05G3831,Gh_D10G1008,Gh_D10G0130,Gh_A07G1603,Gh_A07G1240,Gh_Sca005362G04,Gh_A01G0842,Gh_D09G0593,Gh_D04G0583,Gh_A01G2111,Gh_A11G2663,Gh_D02G1093,Gh_D03G1781,Gh_A05G2854,Gh_D01G0370,Gh_D05G3936,Gh_D05G2242,Gh_D02G0503,Gh_D05G1075,Gh_A11G0922,Gh_D08G0270,Gh_A05G0978,Gh_A11G3033,Gh_D11G3258,Gh_A06G…
GO:0097159	organic cyclic compound binding	molecular_function	0.39047	1	76	202	17649	48611	Gh_A03G0296,Gh_Sca010487G02,Gh_D05G0636,Gh_A09G0411,Gh_A12G0816,Gh_A11G2358,Gh_D06G0902,Gh_A08G1015,Gh_D12G2711,Gh_A08G2132,Gh_D09G0587,Gh_A12G1475,Gh_D10G2202,Gh_D03G0184,Gh_A06G0406,Gh_Sca005611G02,Gh_A03G0149,Gh_D04G0469,Gh_A11G2403,Gh_Sca006711G02,Gh_Sca004751G01,Gh_Sca010487G03,Gh_D02G0146,Gh_D13G0686,Gh_D12G2404,Gh_A09G0281,Gh_D10G1362,Gh_D05G1158,Gh_D11G3196,Gh_D12G1468,Gh_D08G0085,Gh_D10G…
GO:0006022	aminoglycan metabolic process	biological_process	0.39236	1	1	202	119	48611	Gh_A09G2323
GO:0009507	chloroplast	cellular_component	0.39236	1	1	202	119	48611	Gh_A12G0816
GO:0009536	plastid	cellular_component	0.39236	1	1	202	119	48611	Gh_A12G0816
GO:0000775	chromosome, centromeric region	cellular_component	0.39358	1	2	202	325	48611	Gh_A05G3831,Gh_D12G2711
GO:0002376	immune system process	biological_process	0.39358	1	2	202	325	48611	Gh_D10G2202,Gh_A11G0922
GO:0008324	cation transmembrane transporter activity	molecular_function	0.3949	1	12	202	2586	48611	Gh_A12G0777,Gh_A05G3831,Gh_A11G0922,Gh_A06G0349,Gh_A11G2358,Gh_D11G0730,Gh_A01G0843,Gh_A03G0725,Gh_D02G1649,Gh_D12G2404,Gh_A11G3033,Gh_D07G1209
GO:0006098	pentose-phosphate shunt	biological_process	0.3949	1	1	202	120	48611	Gh_A07G1603
GO:0010941	regulation of cell death	biological_process	0.3949	1	1	202	120	48611	Gh_A11G2238
GO:0016597	amino acid binding	molecular_function	0.3949	1	1	202	120	48611	Gh_A09G0362
GO:0042981	regulation of apoptotic process	biological_process	0.3949	1	1	202	120	48611	Gh_A11G2238
GO:0043067	regulation of programmed cell death	biological_process	0.3949	1	1	202	120	48611	Gh_A11G2238
GO:0004222	metalloendopeptidase activity	molecular_function	0.39651	1	2	202	327	48611	Gh_A11G2358,Gh_A05G3831
GO:0008238	exopeptidase activity	molecular_function	0.39651	1	2	202	327	48611	Gh_A05G3831,Gh_A13G1907
GO:0003684	damaged DNA binding	molecular_function	0.39743	1	1	202	121	48611	Gh_D13G0686
GO:0016998	cell wall macromolecule catabolic process	biological_process	0.39743	1	1	202	121	48611	Gh_A09G2323
GO:0051156	glucose 6-phosphate metabolic process	biological_process	0.39743	1	1	202	121	48611	Gh_A07G1603
GO:0009308	amine metabolic process	biological_process	0.39797	1	2	202	328	48611	Gh_A11G2358,Gh_A05G3831
GO:0098805	whole membrane	cellular_component	0.39873	1	3	202	546	48611	Gh_D12G2711,Gh_A11G2358,Gh_A05G0716
GO:0042651	thylakoid membrane	cellular_component	0.39995	1	1	202	122	48611	Gh_Sca007622G02
GO:0044262	cellular carbohydrate metabolic process	biological_process	0.40111	1	5	202	995	48611	Gh_D02G0503,Gh_D04G0317,Gh_A01G0311,Gh_D10G0130,Gh_D08G0270
GO:0016782	transferase activity, transferring sulfur-containing groups	molecular_function	0.40246	1	1	202	123	48611	Gh_A10G0578
GO:0044267	cellular protein metabolic process	biological_process	0.40408	1	33	202	7516	48611	Gh_A01G0842,Gh_A08G2132,Gh_D04G0576,Gh_D02G0877,Gh_D06G1866,Gh_A05G2854,Gh_D03G1781,Gh_A05G0713,Gh_D01G0370,Gh_A11G2358,Gh_A01G2111,Gh_A03G0296,Gh_Sca006711G02,Gh_A05G2494,Gh_A03G0149,Gh_A01G1126,Gh_D09G0587,Gh_A05G1034,Gh_A12G1475,Gh_D10G0130,Gh_D09G0269,Gh_D11G3196,Gh_A06G1129,Gh_A11G3033,Gh_D13G0686,Gh_A11G2238,Gh_D08G1212,Gh_A11G3013,Gh_A05G2374,Gh_A11G0922,Gh_D08G0567,Gh_D02G0503,Gh_D05G2242
GO:0048878	chemical homeostasis	biological_process	0.40496	1	1	202	124	48611	Gh_D02G1649
GO:0005506	iron ion binding	molecular_function	0.40523	1	5	202	1000	48611	Gh_D08G0085,Gh_A05G2246,Gh_D12G1468,Gh_D10G1008,Gh_Sca007622G02
GO:0019222	regulation of metabolic process	biological_process	0.40884	1	26	202	5884	48611	Gh_Sca005611G02,Gh_A05G3831,Gh_D13G1470,Gh_D10G2202,Gh_A11G0922,Gh_D06G0759,Gh_D09G0587,Gh_A08G1584,Gh_D02G0790,Gh_D10G0292,Gh_A03G0149,Gh_A09G2247,Gh_D02G2152,Gh_D02G0877,Gh_A09G0411,Gh_A06G0222,Gh_A12G1973,Gh_A11G2358,Gh_D07G1578,Gh_A03G0296,Gh_A12G0777,Gh_D03G1091,Gh_D12G2711,Gh_D06G0894,Gh_Sca006892G01,Gh_A11G3033
GO:0003968	RNA-directed RNA polymerase activity	molecular_function	0.40961	1	2	202	336	48611	Gh_A05G2494,Gh_A11G2358
GO:0005261	cation channel activity	molecular_function	0.40961	1	2	202	336	48611	Gh_D07G1209,Gh_D02G1649
GO:0008374	O-acyltransferase activity	molecular_function	0.40993	1	1	202	126	48611	Gh_D13G2069
GO:0015932	nucleobase-containing compound transmembrane transporter activity	molecular_function	0.40993	1	1	202	126	48611	Gh_A05G2494
GO:0001071	nucleic acid binding transcription factor activity	molecular_function	0.41067	1	11	202	2385	48611	Gh_D12G2711,Gh_D02G2152,Gh_Sca006892G01,Gh_A09G2247,Gh_A11G2358,Gh_D02G0877,Gh_Sca005611G02,Gh_A09G0411,Gh_A12G1973,Gh_A06G0222,Gh_D13G1470
GO:0003700	transcription factor activity, sequence-specific DNA binding	molecular_function	0.41067	1	11	202	2385	48611	Gh_D12G2711,Gh_A09G2247,Gh_Sca006892G01,Gh_D02G2152,Gh_A06G0222,Gh_A12G1973,Gh_Sca005611G02,Gh_D02G0877,Gh_A09G0411,Gh_A11G2358,Gh_D13G1470
GO:0034637	cellular carbohydrate biosynthetic process	biological_process	0.41203	1	4	202	782	48611	Gh_D10G0130,Gh_A01G0311,Gh_D04G0317,Gh_D02G0503
GO:0000778	condensed nuclear chromosome kinetochore	cellular_component	0.4124	1	1	202	127	48611	Gh_A05G3831
GO:0000780	condensed nuclear chromosome, centromeric region	cellular_component	0.4124	1	1	202	127	48611	Gh_A05G3831
GO:0000940	condensed chromosome outer kinetochore	cellular_component	0.4124	1	1	202	127	48611	Gh_A05G3831
GO:0000942	condensed nuclear chromosome outer kinetochore	cellular_component	0.4124	1	1	202	127	48611	Gh_A05G3831
GO:0019682	glyceraldehyde-3-phosphate metabolic process	biological_process	0.4124	1	1	202	127	48611	Gh_A07G1603
GO:0042729	DASH complex	cellular_component	0.4124	1	1	202	127	48611	Gh_A05G3831
GO:0050789	regulation of biological process	biological_process	0.41281	1	39	202	8960	48611	Gh_D02G1619,Gh_D08G0270,Gh_A11G0922,Gh_D02G0790,Gh_A11G3013,Gh_D10G0292,Gh_D10G1453,Gh_A11G2238,Gh_D02G0146,Gh_A06G0222,Gh_A12G0777,Gh_Sca006892G01,Gh_A11G3033,Gh_Sca005611G02,Gh_A05G3831,Gh_D13G1470,Gh_D10G2202,Gh_D06G0759,Gh_D09G0587,Gh_A08G1584,Gh_D02G2152,Gh_A07G1965,Gh_A09G2247,Gh_A03G0149,Gh_D11G0730,Gh_A11G2358,Gh_D07G1578,Gh_D13G1348,Gh_A09G0411,Gh_D06G1866,Gh_D02G0877,Gh_A12G1973,Gh_D10G…
GO:0019080	viral gene expression	biological_process	0.41486	1	1	202	128	48611	Gh_D13G2004
GO:0042592	homeostatic process	biological_process	0.41766	1	3	202	563	48611	Gh_D02G1649,Gh_D10G1453,Gh_A11G2358
GO:0016616	oxidoreductase activity, acting on the CH-OH group of donors, NAD or NADP as acceptor	molecular_function	0.4195	1	4	202	790	48611	Gh_D06G0041,Gh_A01G0311,Gh_A11G3033,Gh_A07G1603
GO:0030554	adenyl nucleotide binding	molecular_function	0.42063	1	31	202	7096	48611	Gh_A08G0670,Gh_A11G2663,Gh_A03G0296,Gh_Sca010487G02,Gh_D04G0317,Gh_D01G0370,Gh_A11G2358,Gh_A05G2854,Gh_A12G0816,Gh_A06G1129,Gh_A07G1240,Gh_D04G0583,Gh_A08G2132,Gh_D13G2004,Gh_A01G0842,Gh_A05G0978,Gh_D10G0130,Gh_A05G3831,Gh_D10G2202,Gh_D02G0503,Gh_A11G0922,Gh_D09G0587,Gh_D05G2242,Gh_A05G1034,Gh_A12G1475,Gh_A11G2403,Gh_A05G2494,Gh_Sca010487G03,Gh_Sca004751G01,Gh_A08G1584,Gh_Sca006711G02
GO:0006664	glycolipid metabolic process	biological_process	0.42114	1	2	202	344	48611	Gh_A11G2358,Gh_A11G0922
GO:0006739	NADP metabolic process	biological_process	0.42217	1	1	202	131	48611	Gh_A07G1603
GO:0098687	chromosomal region	cellular_component	0.42829	1	2	202	349	48611	Gh_A05G3831,Gh_D12G2711
GO:0044427	chromosomal part	cellular_component	0.42871	1	3	202	573	48611	Gh_D01G2275,Gh_A05G3831,Gh_D12G2711
GO:0009405	pathogenesis	biological_process	0.4288	1	4	202	800	48611	Gh_A07G1608,Gh_A07G1702,Gh_A05G0978,Gh_A11G0922
GO:0006265	DNA topological change	biological_process	0.43416	1	1	202	136	48611	Gh_A05G3831
GO:0051537	2 iron, 2 sulfur cluster binding	molecular_function	0.43416	1	1	202	136	48611	Gh_D06G0759
GO:0017004	cytochrome complex assembly	biological_process	0.43652	1	1	202	137	48611	Gh_A10G1038
GO:0045892	negative regulation of transcription, DNA-templated	biological_process	0.43652	1	1	202	137	48611	Gh_D10G2202
GO:0051253	negative regulation of RNA metabolic process	biological_process	0.43652	1	1	202	137	48611	Gh_D10G2202
GO:1902679	negative regulation of RNA biosynthetic process	biological_process	0.43652	1	1	202	137	48611	Gh_D10G2202
GO:1903507	negative regulation of nucleic acid-templated transcription	biological_process	0.43652	1	1	202	137	48611	Gh_D10G2202
GO:0022607	cellular component assembly	biological_process	0.43715	1	6	202	1270	48611	Gh_A11G2358,Gh_D04G0583,Gh_A08G1015,Gh_A10G1038,Gh_A11G3033,Gh_D02G0503
GO:0016627	oxidoreductase activity, acting on the CH-CH group of donors	molecular_function	0.43963	1	2	202	357	48611	Gh_D10G2202,Gh_D12G2422
GO:0000777	condensed chromosome kinetochore	cellular_component	0.44123	1	1	202	139	48611	Gh_A05G3831
GO:0000779	condensed chromosome, centromeric region	cellular_component	0.44123	1	1	202	139	48611	Gh_A05G3831
GO:0005604	basement membrane	cellular_component	0.44123	1	1	202	139	48611	Gh_A11G2358
GO:0016773	phosphotransferase activity, alcohol group as acceptor	molecular_function	0.44124	1	18	202	4087	48611	Gh_A03G0296,Gh_D06G1866,Gh_A11G2358,Gh_D01G0370,Gh_A06G1129,Gh_A01G0842,Gh_A08G2132,Gh_D09G0587,Gh_D05G2242,Gh_A12G1475,Gh_A05G1034,Gh_D02G0503,Gh_A05G3831,Gh_D10G0130,Gh_A08G0871,Gh_A09G0362,Gh_Sca006711G02,Gh_A05G2494
GO:0005634	nucleus	cellular_component	0.44327	1	23	202	5272	48611	Gh_A11G3033,Gh_D03G1091,Gh_A07G0876,Gh_D12G2711,Gh_D05G1158,Gh_D07G0576,Gh_D04G0317,Gh_A06G0349,Gh_A11G2358,Gh_A11G2238,Gh_D07G1578,Gh_D03G1781,Gh_D02G2152,Gh_D04G0469,Gh_D10G0292,Gh_D05G0705,Gh_D01G2275,Gh_A03G0149,Gh_A08G1584,Gh_D13G1470,Gh_A05G3831,Gh_A11G0922,Gh_D09G0587
GO:0051082	unfolded protein binding	molecular_function	0.44385	1	2	202	360	48611	Gh_A05G0716,Gh_A11G2358
GO:0008653	lipopolysaccharide metabolic process	biological_process	0.44805	1	2	202	363	48611	Gh_D10G0130,Gh_D02G0503
GO:0009103	lipopolysaccharide biosynthetic process	biological_process	0.44805	1	2	202	363	48611	Gh_D02G0503,Gh_D10G0130
GO:0016053	organic acid biosynthetic process	biological_process	0.44821	1	4	202	821	48611	Gh_D13G2069,Gh_A05G0700,Gh_D13G0686,Gh_D12G2422
GO:0046394	carboxylic acid biosynthetic process	biological_process	0.44821	1	4	202	821	48611	Gh_D13G2069,Gh_D13G0686,Gh_D12G2422,Gh_A05G0700
GO:0005975	carbohydrate metabolic process	biological_process	0.44892	1	14	202	3162	48611	Gh_A08G1584,Gh_D05G0815,Gh_A11G3033,Gh_A09G0362,Gh_A06G0406,Gh_A08G0871,Gh_D02G1219,Gh_A11G2358,Gh_D05G2242,Gh_D04G0317,Gh_D02G0503,Gh_D08G0270,Gh_D10G0130,Gh_A01G0311
GO:0006497	protein lipidation	biological_process	0.45052	1	1	202	143	48611	Gh_A11G2358
GO:0006506	GPI anchor biosynthetic process	biological_process	0.45052	1	1	202	143	48611	Gh_A11G2358
GO:0006661	phosphatidylinositol biosynthetic process	biological_process	0.45052	1	1	202	143	48611	Gh_A11G2358
GO:0030674	protein binding, bridging	molecular_function	0.45052	1	1	202	143	48611	Gh_D13G1464
GO:0060090	binding, bridging	molecular_function	0.45052	1	1	202	143	48611	Gh_D13G1464
GO:0044459	plasma membrane part	cellular_component	0.45224	1	2	202	366	48611	Gh_A11G2358,Gh_D04G0317
GO:0006629	lipid metabolic process	biological_process	0.45387	1	12	202	2701	48611	Gh_D05G1075,Gh_D02G0503,Gh_A11G0922,Gh_D08G0270,Gh_A01G0311,Gh_D10G0130,Gh_A01G0843,Gh_A07G1603,Gh_A11G2358,Gh_D06G0041,Gh_D13G0686,Gh_A03G2022
GO:0044431	Golgi apparatus part	cellular_component	0.45502	1	2	202	368	48611	Gh_A11G2358,Gh_D13G0686
GO:0003916	DNA topoisomerase activity	molecular_function	0.45511	1	1	202	145	48611	Gh_A05G3831
GO:0006081	cellular aldehyde metabolic process	biological_process	0.45511	1	1	202	145	48611	Gh_A07G1603
GO:0044283	small molecule biosynthetic process	biological_process	0.45667	1	5	202	1063	48611	Gh_D12G2711,Gh_D13G2069,Gh_A05G0700,Gh_D13G0686,Gh_D12G2422
GO:1901605	alpha-amino acid metabolic process	biological_process	0.45707	1	3	202	599	48611	Gh_A05G0700,Gh_D12G2422,Gh_D13G2069
GO:0006783	heme biosynthetic process	biological_process	0.45966	1	1	202	147	48611	Gh_D12G2422
GO:0005819	spindle	cellular_component	0.46193	1	1	202	148	48611	Gh_A05G3831
GO:0030029	actin filament-based process	biological_process	0.46193	1	1	202	148	48611	Gh_A05G0700
GO:0030036	actin cytoskeleton organization	biological_process	0.46193	1	1	202	148	48611	Gh_A05G0700
GO:0006643	membrane lipid metabolic process	biological_process	0.46193	1	2	202	373	48611	Gh_A11G0922,Gh_A11G2358
GO:0044767	single-organism developmental process	biological_process	0.46286	1	4	202	837	48611	Gh_A11G2358,Gh_D04G0583,Gh_A08G1015,Gh_A11G0922
GO:0031406	carboxylic acid binding	molecular_function	0.46418	1	1	202	149	48611	Gh_A09G0362
GO:0043177	organic acid binding	molecular_function	0.46418	1	1	202	149	48611	Gh_A09G0362
GO:0006468	protein phosphorylation	biological_process	0.46742	1	14	202	3201	48611	Gh_D01G0370,Gh_D06G1866,Gh_D10G0130,Gh_D09G0587,Gh_A03G0296,Gh_D05G2242,Gh_A12G1475,Gh_A05G1034,Gh_D02G0503,Gh_A08G2132,Gh_A05G2494,Gh_Sca006711G02,Gh_A01G0842,Gh_A06G1129
GO:0016108	tetraterpenoid metabolic process	biological_process	0.46865	1	1	202	151	48611	Gh_D05G1075
GO:0016109	tetraterpenoid biosynthetic process	biological_process	0.46865	1	1	202	151	48611	Gh_D05G1075
GO:0016116	carotenoid metabolic process	biological_process	0.46865	1	1	202	151	48611	Gh_D05G1075
GO:0016117	carotenoid biosynthetic process	biological_process	0.46865	1	1	202	151	48611	Gh_D05G1075
GO:0042158	lipoprotein biosynthetic process	biological_process	0.46865	1	1	202	151	48611	Gh_A11G2358
GO:0044707	single-multicellular organism process	biological_process	0.47013	1	4	202	845	48611	Gh_A08G1015,Gh_A12G0777,Gh_D05G0815,Gh_D09G1694
GO:0005794	Golgi apparatus	cellular_component	0.47016	1	2	202	379	48611	Gh_A11G2358,Gh_D13G0686
GO:0044420	extracellular matrix component	cellular_component	0.47088	1	1	202	152	48611	Gh_A11G2358
GO:0050661	NADP binding	molecular_function	0.47088	1	1	202	152	48611	Gh_A07G1603
GO:0005543	phospholipid binding	molecular_function	0.47309	1	1	202	153	48611	Gh_D05G2675
GO:0016628	oxidoreductase activity, acting on the CH-CH group of donors, NAD or NADP as acceptor	molecular_function	0.47309	1	1	202	153	48611	Gh_D12G2422
GO:0090575	RNA polymerase II transcription factor complex	cellular_component	0.4753	1	1	202	154	48611	Gh_A07G0876
GO:0016757	transferase activity, transferring glycosyl groups	molecular_function	0.47637	1	7	202	1560	48611	Gh_D04G0583,Gh_D05G0602,Gh_A11G2358,Gh_A07G2043,Gh_D05G2242,Gh_D04G0317,Gh_D08G0270
GO:0019748	secondary metabolic process	biological_process	0.47968	1	1	202	156	48611	Gh_A11G2358
GO:0042168	heme metabolic process	biological_process	0.47968	1	1	202	156	48611	Gh_D12G2422
GO:1901681	sulfur compound binding	molecular_function	0.48186	1	1	202	157	48611	Gh_D08G0270
GO:0043933	macromolecular complex subunit organization	biological_process	0.48235	1	5	202	1095	48611	Gh_A05G0700,Gh_A10G1038,Gh_A08G1015,Gh_A11G0922,Gh_A11G2358
GO:0008237	metallopeptidase activity	molecular_function	0.48237	1	2	202	388	48611	Gh_A11G2358,Gh_A05G3831
GO:0004175	endopeptidase activity	molecular_function	0.48238	1	7	202	1569	48611	Gh_D04G0583,Gh_A11G2358,Gh_A05G2246,Gh_A03G2036,Gh_A05G3831,Gh_D10G2202,Gh_D04G1996
GO:0044802	single-organism membrane organization	biological_process	0.48371	1	2	202	389	48611	Gh_A05G0716,Gh_A11G2358
GO:0044033	multi-organism metabolic process	biological_process	0.48403	1	1	202	158	48611	Gh_D13G2004
GO:0003857	3-hydroxyacyl-CoA dehydrogenase activity	molecular_function	0.48619	1	1	202	159	48611	Gh_A07G1603
GO:0033036	macromolecule localization	biological_process	0.48765	1	11	202	2529	48611	Gh_D02G1649,Gh_D10G1453,Gh_Sca004751G01,Gh_D12G1932,Gh_A07G1608,Gh_D12G2711,Gh_D05G2734,Gh_D05G2242,Gh_A11G2358,Gh_D06G1345,Gh_D03G1781
GO:0022891	substrate-specific transmembrane transporter activity	molecular_function	0.49009	1	14	202	3249	48611	Gh_A06G0349,Gh_A11G0922,Gh_A05G3831,Gh_A12G0777,Gh_A01G0843,Gh_A03G0725,Gh_A11G2358,Gh_D11G0730,Gh_A11G3033,Gh_D12G2404,Gh_D02G1649,Gh_A07G1608,Gh_D07G1209,Gh_A05G2494
GO:0000794	condensed nuclear chromosome	cellular_component	0.49048	1	1	202	161	48611	Gh_A05G3831
GO:0016042	lipid catabolic process	biological_process	0.49261	1	1	202	162	48611	Gh_A11G0922
GO:0044272	sulfur compound biosynthetic process	biological_process	0.49261	1	1	202	162	48611	Gh_D13G2069
GO:0045934	negative regulation of nucleobase-containing compound metabolic process	biological_process	0.49261	1	1	202	162	48611	Gh_D10G2202
GO:0004866	endopeptidase inhibitor activity	molecular_function	0.49474	1	1	202	163	48611	Gh_D10G2220
GO:0016591	DNA-directed RNA polymerase II, holoenzyme	cellular_component	0.49474	1	1	202	163	48611	Gh_A07G0876
GO:0044798	nuclear transcription factor complex	cellular_component	0.49474	1	1	202	163	48611	Gh_A07G0876
GO:0061135	endopeptidase regulator activity	molecular_function	0.49474	1	1	202	163	48611	Gh_D10G2220
GO:0004857	enzyme inhibitor activity	molecular_function	0.49637	1	3	202	636	48611	Gh_A07G1603,Gh_A11G2358,Gh_D10G2220
GO:0019538	protein metabolic process	biological_process	0.49895	1	38	202	9009	48611	Gh_D11G3196,Gh_D13G2004,Gh_A11G3033,Gh_A06G1129,Gh_D13G0686,Gh_A11G2238,Gh_D08G1212,Gh_A11G3013,Gh_A13G1907,Gh_D10G1453,Gh_A05G2374,Gh_D05G2242,Gh_D08G0567,Gh_D02G0503,Gh_A11G0922,Gh_A01G0842,Gh_A08G2132,Gh_D04G1996,Gh_D04G0576,Gh_D03G1781,Gh_A05G0713,Gh_D06G1866,Gh_A05G2854,Gh_D02G0877,Gh_D01G0370,Gh_A11G2358,Gh_A03G0296,Gh_A01G2111,Gh_Sca006711G02,Gh_A05G2246,Gh_A05G2494,Gh_A03G0149,Gh_A01G1126…
GO:0004527	exonuclease activity	molecular_function	0.49896	1	1	202	165	48611	Gh_D10G2202
GO:0006304	DNA modification	biological_process	0.50315	1	1	202	167	48611	Gh_D04G0317
GO:0071554	cell wall organization or biogenesis	biological_process	0.50363	1	2	202	404	48611	Gh_A11G2358,Gh_A09G2323
GO:0010558	negative regulation of macromolecule biosynthetic process	biological_process	0.5073	1	1	202	169	48611	Gh_D10G2202
GO:0015035	protein disulfide oxidoreductase activity	molecular_function	0.5073	1	1	202	169	48611	Gh_D10G1453
GO:0015036	disulfide oxidoreductase activity	molecular_function	0.5073	1	1	202	169	48611	Gh_D10G1453
GO:0019079	viral genome replication	biological_process	0.5073	1	1	202	169	48611	Gh_Sca004751G01
GO:0031327	negative regulation of cellular biosynthetic process	biological_process	0.5073	1	1	202	169	48611	Gh_D10G2202
GO:0046474	glycerophospholipid biosynthetic process	biological_process	0.5073	1	1	202	169	48611	Gh_A11G2358
GO:2000113	negative regulation of cellular macromolecule biosynthetic process	biological_process	0.5073	1	1	202	169	48611	Gh_D10G2202
GO:0070011	peptidase activity, acting on L-amino acid peptides	molecular_function	0.50933	1	9	202	2090	48611	Gh_A11G2358,Gh_D10G2202,Gh_A05G3831,Gh_A05G2246,Gh_A05G2494,Gh_D04G0583,Gh_A13G1907,Gh_A03G2036,Gh_D04G1996
GO:0032502	developmental process	biological_process	0.51034	1	4	202	890	48611	Gh_A11G2358,Gh_D04G0583,Gh_A08G1015,Gh_A11G0922
GO:0009890	negative regulation of biosynthetic process	biological_process	0.51142	1	1	202	171	48611	Gh_D10G2202
GO:0043231	intracellular membrane-bounded organelle	cellular_component	0.51167	1	32	202	7613	48611	Gh_D09G0587,Gh_D13G1470,Gh_A05G3831,Gh_A03G0149,Gh_D01G2275,Gh_A05G0716,Gh_D04G0469,Gh_D02G2152,Gh_A08G1584,Gh_D13G2339,Gh_A06G0349,Gh_D03G1781,Gh_A12G0816,Gh_A01G0843,Gh_D07G1578,Gh_D11G0730,Gh_A11G2358,Gh_D12G2711,Gh_D03G1091,Gh_A11G0922,Gh_D05G0705,Gh_D10G0292,Gh_D04G0317,Gh_A12G0777,Gh_D07G0576,Gh_A11G2238,Gh_A11G3033,Gh_D12G2404,Gh_D13G0686,Gh_D05G1158,Gh_A07G0876,Gh_D02G1538
GO:0005216	ion channel activity	molecular_function	0.5119	1	3	202	651	48611	Gh_D07G1209,Gh_A07G1608,Gh_D02G1649
GO:0022838	substrate-specific channel activity	molecular_function	0.5119	1	3	202	651	48611	Gh_A07G1608,Gh_D07G1209,Gh_D02G1649
GO:0008233	peptidase activity	molecular_function	0.51258	1	10	202	2336	48611	Gh_A03G2036,Gh_A05G2246,Gh_A13G1907,Gh_D04G0583,Gh_A05G2494,Gh_D04G1996,Gh_D13G0686,Gh_A11G2358,Gh_D10G2202,Gh_A05G3831
GO:0072528	pyrimidine-containing compound biosynthetic process	biological_process	0.51346	1	1	202	172	48611	Gh_D10G2202
GO:0043227	membrane-bounded organelle	cellular_component	0.51458	1	32	202	7622	48611	Gh_D13G2339,Gh_A06G0349,Gh_D11G0730,Gh_A11G2358,Gh_D07G1578,Gh_A01G0843,Gh_A12G0816,Gh_D03G1781,Gh_D03G1091,Gh_D12G2711,Gh_D13G1470,Gh_A05G3831,Gh_D09G0587,Gh_D02G2152,Gh_D04G0469,Gh_D01G2275,Gh_A03G0149,Gh_A05G0716,Gh_A08G1584,Gh_D07G0576,Gh_A12G0777,Gh_D04G0317,Gh_A11G2238,Gh_D12G2404,Gh_D13G0686,Gh_A11G3033,Gh_D02G1538,Gh_A07G0876,Gh_D05G1158,Gh_A11G0922,Gh_D10G0292,Gh_D05G0705
GO:0004190	aspartic-type endopeptidase activity	molecular_function	0.51535	1	2	202	413	48611	Gh_D04G0583,Gh_D04G1996
GO:0042802	identical protein binding	molecular_function	0.51535	1	2	202	413	48611	Gh_D05G2242,Gh_D13G1464
GO:0070001	aspartic-type peptidase activity	molecular_function	0.51535	1	2	202	413	48611	Gh_D04G1996,Gh_D04G0583
GO:0016301	kinase activity	molecular_function	0.51656	1	18	202	4267	48611	Gh_A06G1129,Gh_D13G2004,Gh_A01G0842,Gh_D04G0583,Gh_A08G2132,Gh_A03G0296,Gh_D06G1866,Gh_A11G2358,Gh_D01G0370,Gh_Sca006711G02,Gh_A05G2494,Gh_A05G3831,Gh_D02G0503,Gh_A12G1475,Gh_D09G0587,Gh_D05G2242,Gh_A05G1034,Gh_D10G0130
GO:0019725	cellular homeostasis	biological_process	0.51793	1	2	202	415	48611	Gh_D10G1453,Gh_D02G1649
GO:0000776	kinetochore	cellular_component	0.51955	1	1	202	175	48611	Gh_A05G3831
GO:0042440	pigment metabolic process	biological_process	0.52007	1	3	202	659	48611	Gh_D05G1075,Gh_D12G2422,Gh_A13G1907
GO:0030414	peptidase inhibitor activity	molecular_function	0.52156	1	1	202	176	48611	Gh_D10G2220
GO:0061134	peptidase regulator activity	molecular_function	0.52156	1	1	202	176	48611	Gh_D10G2220
GO:0051172	negative regulation of nitrogen compound metabolic process	biological_process	0.52556	1	1	202	178	48611	Gh_D10G2202
GO:0007155	cell adhesion	biological_process	0.52561	1	2	202	421	48611	Gh_A07G0166,Gh_A11G2358
GO:0000428	DNA-directed RNA polymerase complex	cellular_component	0.52755	1	1	202	179	48611	Gh_A07G0876
GO:0016485	protein processing	biological_process	0.52755	1	1	202	179	48611	Gh_D13G2004
GO:0030880	RNA polymerase complex	cellular_component	0.52755	1	1	202	179	48611	Gh_A07G0876
GO:0051604	protein maturation	biological_process	0.52755	1	1	202	179	48611	Gh_D13G2004
GO:0055029	nuclear DNA-directed RNA polymerase complex	cellular_component	0.52755	1	1	202	179	48611	Gh_A07G0876
GO:0015075	ion transmembrane transporter activity	molecular_function	0.52806	1	13	202	3089	48611	Gh_A06G0349,Gh_A11G0922,Gh_A05G3831,Gh_A12G0777,Gh_A03G0725,Gh_A01G0843,Gh_D11G0730,Gh_A11G2358,Gh_A11G3033,Gh_D12G2404,Gh_D02G1649,Gh_A07G1608,Gh_D07G1209
GO:0031514	motile cilium	cellular_component	0.52952	1	1	202	180	48611	Gh_A11G2358
GO:0098519	nucleotide phosphatase activity, acting on free nucleotides	molecular_function	0.52952	1	1	202	180	48611	Gh_Sca010487G03
GO:0008380	RNA splicing	biological_process	0.53149	1	1	202	181	48611	Gh_D10G2202
GO:0008276	protein methyltransferase activity	molecular_function	0.53346	1	1	202	182	48611	Gh_A12G1973
GO:0016410	N-acyltransferase activity	molecular_function	0.53346	1	1	202	182	48611	Gh_D06G0902
GO:0016758	transferase activity, transferring hexosyl groups	molecular_function	0.53393	1	5	202	1161	48611	Gh_A11G2358,Gh_D05G0602,Gh_A07G2043,Gh_D04G0317,Gh_D08G0270
GO:0015267	channel activity	molecular_function	0.53421	1	3	202	673	48611	Gh_D02G1649,Gh_D07G1209,Gh_A07G1608
GO:0022803	passive transmembrane transporter activity	molecular_function	0.53421	1	3	202	673	48611	Gh_D07G1209,Gh_A07G1608,Gh_D02G1649
GO:0035251	UDP-glucosyltransferase activity	molecular_function	0.53541	1	1	202	183	48611	Gh_D04G0317
GO:0008375	acetylglucosaminyltransferase activity	molecular_function	0.53736	1	1	202	184	48611	Gh_A07G2043
GO:0033644	host cell membrane	cellular_component	0.53736	1	1	202	184	48611	Gh_A05G2494
GO:0044218	other organism cell membrane	cellular_component	0.53736	1	1	202	184	48611	Gh_A05G2494
GO:0044279	other organism membrane	cellular_component	0.53736	1	1	202	184	48611	Gh_A05G2494
GO:0070925	organelle assembly	biological_process	0.53736	1	1	202	184	48611	Gh_A11G3033
GO:0003777	microtubule motor activity	molecular_function	0.54315	1	1	202	187	48611	Gh_A11G2403
GO:0004129	cytochrome-c oxidase activity	molecular_function	0.54315	1	1	202	187	48611	Gh_A12G0777
GO:0016675	oxidoreductase activity, acting on a heme group of donors	molecular_function	0.54315	1	1	202	187	48611	Gh_A12G0777
GO:0016676	oxidoreductase activity, acting on a heme group of donors, oxygen as acceptor	molecular_function	0.54315	1	1	202	187	48611	Gh_A12G0777
GO:0098813	nuclear chromosome segregation	biological_process	0.54506	1	1	202	188	48611	Gh_A05G3831
GO:0016679	oxidoreductase activity, acting on diphenols and related substances as donors	molecular_function	0.54696	1	1	202	189	48611	Gh_A04G0970
GO:0045017	glycerolipid biosynthetic process	biological_process	0.55075	1	1	202	191	48611	Gh_A11G2358
GO:0000793	condensed chromosome	cellular_component	0.55263	1	1	202	192	48611	Gh_A05G3831
GO:0005643	nuclear pore	cellular_component	0.55263	1	1	202	192	48611	Gh_A05G3831
GO:0005929	cilium	cellular_component	0.55263	1	1	202	192	48611	Gh_A11G2358
GO:0046527	glucosyltransferase activity	molecular_function	0.55263	1	1	202	192	48611	Gh_D04G0317
GO:0008194	UDP-glycosyltransferase activity	molecular_function	0.55549	1	2	202	445	48611	Gh_D04G0317,Gh_A07G2043
GO:0016706	oxidoreductase activity, acting on paired donors, with incorporation or reduction of molecular oxygen, 2-oxoglutarate as one donor, and incorporation of one atom each of oxygen into both donors	molecular_function	0.55549	1	2	202	445	48611	Gh_D02G1418,Gh_A08G1668
GO:0006915	apoptotic process	biological_process	0.55637	1	1	202	194	48611	Gh_A11G2238
GO:0012501	programmed cell death	biological_process	0.55637	1	1	202	194	48611	Gh_A11G2238
GO:0072527	pyrimidine-containing compound metabolic process	biological_process	0.56008	1	1	202	196	48611	Gh_D10G2202
GO:0015079	potassium ion transmembrane transporter activity	molecular_function	0.56193	1	1	202	197	48611	Gh_D07G1209
GO:0016407	acetyltransferase activity	molecular_function	0.56193	1	1	202	197	48611	Gh_D13G2069
GO:0008236	serine-type peptidase activity	molecular_function	0.56273	1	3	202	702	48611	Gh_D10G2202,Gh_A03G2036,Gh_A05G2246
GO:0017171	serine hydrolase activity	molecular_function	0.56273	1	3	202	702	48611	Gh_A03G2036,Gh_A05G2246,Gh_D10G2202
GO:0008200	ion channel inhibitor activity	molecular_function	0.56376	1	1	202	198	48611	Gh_A07G1608
GO:0016248	channel inhibitor activity	molecular_function	0.56376	1	1	202	198	48611	Gh_A07G1608
GO:0044877	macromolecular complex binding	molecular_function	0.56454	1	6	202	1449	48611	Gh_D02G0291,Gh_A10G0190,Gh_A11G2403,Gh_A11G2358,Gh_A11G2177,Gh_D12G2711
GO:0003676	nucleic acid binding	molecular_function	0.56634	1	41	202	9959	48611	Gh_D12G2711,Gh_D09G0593,Gh_A07G1240,Gh_D06G0902,Gh_A08G1015,Gh_D03G1781,Gh_A09G0411,Gh_A11G2358,Gh_Sca010487G02,Gh_A11G2663,Gh_D02G1093,Gh_A08G1584,Gh_Sca004751G01,Gh_Sca010487G03,Gh_A05G2494,Gh_A03G0149,Gh_D04G0469,Gh_D02G2152,Gh_A06G0406,Gh_Sca005611G02,Gh_D10G2202,Gh_D13G1470,Gh_A05G3831,Gh_D03G0184,Gh_D10G1362,Gh_D05G1158,Gh_A07G0876,Gh_D11G3258,Gh_D13G0686,Gh_D12G2404,Gh_A09G0281,Gh_D02G0146…
GO:0005667	transcription factor complex	cellular_component	0.56741	1	1	202	200	48611	Gh_A07G0876
GO:0007166	cell surface receptor signaling pathway	biological_process	0.56741	1	1	202	200	48611	Gh_D02G1619
GO:0050660	flavin adenine dinucleotide binding	molecular_function	0.56755	1	2	202	455	48611	Gh_D12G2422,Gh_D05G1075
GO:0016668	oxidoreductase activity, acting on a sulfur group of donors, NAD(P) as acceptor	molecular_function	0.57103	1	1	202	202	48611	Gh_D06G0894
GO:0047134	protein-disulfide reductase activity	molecular_function	0.57103	1	1	202	202	48611	Gh_D06G0894
GO:0071702	organic substance transport	biological_process	0.57283	1	12	202	2939	48611	Gh_D12G1932,Gh_Sca004751G01,Gh_D12G2711,Gh_A07G1608,Gh_D13G0686,Gh_D02G1649,Gh_D10G1453,Gh_D03G1781,Gh_D06G1345,Gh_D05G2242,Gh_D05G2734,Gh_D08G1251
GO:0019031	viral envelope	cellular_component	0.57422	1	3	202	714	48611	Gh_D01G1124,Gh_D10G2202,Gh_A05G1584
GO:0036338	viral membrane	cellular_component	0.57422	1	3	202	714	48611	Gh_D10G2202,Gh_D01G1124,Gh_A05G1584
GO:0015002	heme-copper terminal oxidase activity	molecular_function	0.57461	1	1	202	204	48611	Gh_A12G0777
GO:0006281	DNA repair	biological_process	0.57582	1	5	202	1217	48611	Gh_D13G0686,Gh_D01G2275,Gh_A07G1240,Gh_A05G3831,Gh_A11G2358
GO:0010629	negative regulation of gene expression	biological_process	0.5764	1	1	202	205	48611	Gh_D10G2202
GO:0051274	beta-glucan biosynthetic process	biological_process	0.5764	1	1	202	205	48611	Gh_D04G0317
GO:0051273	beta-glucan metabolic process	biological_process	0.57994	1	1	202	207	48611	Gh_D04G0317
GO:0008219	cell death	biological_process	0.5817	1	1	202	208	48611	Gh_A11G2238
GO:0016265	death	biological_process	0.5817	1	1	202	208	48611	Gh_A11G2238
GO:0006511	ubiquitin-dependent protein catabolic process	biological_process	0.58171	1	2	202	467	48611	Gh_D13G0686,Gh_A11G3013
GO:0016746	transferase activity, transferring acyl groups	molecular_function	0.58224	1	4	202	975	48611	Gh_D13G2069,Gh_A03G2022,Gh_A03G0885,Gh_D06G0902
GO:0019941	modification-dependent protein catabolic process	biological_process	0.58519	1	2	202	470	48611	Gh_A11G3013,Gh_D13G0686
GO:0043632	modification-dependent macromolecule catabolic process	biological_process	0.58519	1	2	202	470	48611	Gh_A11G3013,Gh_D13G0686
GO:0009247	glycolipid biosynthetic process	biological_process	0.5852	1	1	202	210	48611	Gh_A11G2358
GO:0046467	membrane lipid biosynthetic process	biological_process	0.5852	1	1	202	210	48611	Gh_A11G2358
GO:0016747	transferase activity, transferring acyl groups other than amino-acyl groups	molecular_function	0.58738	1	3	202	728	48611	Gh_D06G0902,Gh_A03G0885,Gh_D13G2069
GO:0042626	ATPase activity, coupled to transmembrane movement of substances	molecular_function	0.59096	1	2	202	475	48611	Gh_D04G0583,Gh_A05G3831
GO:0043492	ATPase activity, coupled to movement of substances	molecular_function	0.59096	1	2	202	475	48611	Gh_D04G0583,Gh_A05G3831
GO:0006820	anion transport	biological_process	0.59552	1	2	202	479	48611	Gh_D13G0686,Gh_D08G1251
GO:0003887	DNA-directed DNA polymerase activity	molecular_function	0.59721	1	1	202	217	48611	Gh_D13G1470
GO:0016903	oxidoreductase activity, acting on the aldehyde or oxo group of donors	molecular_function	0.59721	1	1	202	217	48611	Gh_D08G0270
GO:0005694	chromosome	cellular_component	0.59846	1	3	202	740	48611	Gh_D01G2275,Gh_A05G3831,Gh_D12G2711
GO:0005488	binding	molecular_function	0.60245	1	123	202	29782	48611	Gh_D08G0085,Gh_A08G0871,Gh_A11G2177,Gh_A05G1584,Gh_A11G2636,Gh_A09G2400,Gh_D02G0790,Gh_D12G2422,Gh_D03G0729,Gh_D13G1518,Gh_D10G0292,Gh_D02G0146,Gh_D05G2675,Gh_A12G1892,Gh_D12G1468,Gh_D05G1158,Gh_D10G1362,Gh_D11G3196,Gh_D12G2404,Gh_D13G0686,Gh_A09G0281,Gh_A10G0190,Gh_D06G1600,Gh_A06G0406,Gh_Sca005611G02,Gh_D03G0184,Gh_D09G0587,Gh_A12G1475,Gh_A08G1668,Gh_D10G2202,Gh_D13G1464,Gh_Sca004751G01,Gh_Sca0…
GO:0015291	secondary active transmembrane transporter activity	molecular_function	0.60566	1	2	202	488	48611	Gh_D13G0686,Gh_D02G1620
GO:0043412	macromolecule modification	biological_process	0.60598	1	19	202	4735	48611	Gh_Sca006711G02,Gh_A05G2494,Gh_D02G0503,Gh_A11G0922,Gh_D05G2242,Gh_D09G0587,Gh_A12G1475,Gh_A05G1034,Gh_D10G0130,Gh_A06G1129,Gh_D04G0576,Gh_D09G0615,Gh_A01G0842,Gh_A08G2132,Gh_D04G0317,Gh_A03G0296,Gh_D06G1866,Gh_A11G2358,Gh_D01G0370
GO:0061024	membrane organization	biological_process	0.60788	1	2	202	490	48611	Gh_A05G0716,Gh_A11G2358
GO:0004672	protein kinase activity	molecular_function	0.60909	1	14	202	3511	48611	Gh_A06G1129,Gh_Sca006711G02,Gh_A01G0842,Gh_A08G2132,Gh_A05G2494,Gh_D09G0587,Gh_D05G2242,Gh_A03G0296,Gh_A12G1475,Gh_A05G1034,Gh_D02G0503,Gh_D10G0130,Gh_D06G1866,Gh_D01G0370
GO:0022610	biological adhesion	biological_process	0.6101	1	2	202	492	48611	Gh_A07G0166,Gh_A11G2358
GO:0033013	tetrapyrrole metabolic process	biological_process	0.61203	1	3	202	755	48611	Gh_A13G1907,Gh_D12G2711,Gh_D12G2422
GO:0006486	protein glycosylation	biological_process	0.61216	1	1	202	226	48611	Gh_D05G2242
GO:0009101	glycoprotein biosynthetic process	biological_process	0.61216	1	1	202	226	48611	Gh_D05G2242
GO:0043413	macromolecule glycosylation	biological_process	0.61216	1	1	202	226	48611	Gh_D05G2242
GO:0009250	glucan biosynthetic process	biological_process	0.61378	1	1	202	227	48611	Gh_D04G0317
GO:0031324	negative regulation of cellular metabolic process	biological_process	0.61378	1	1	202	227	48611	Gh_D10G2202
GO:0009100	glycoprotein metabolic process	biological_process	0.6154	1	1	202	228	48611	Gh_D05G2242
GO:0009110	vitamin biosynthetic process	biological_process	0.6154	1	1	202	228	48611	Gh_D12G2711
GO:0042364	water-soluble vitamin biosynthetic process	biological_process	0.6154	1	1	202	228	48611	Gh_D12G2711
GO:0006631	fatty acid metabolic process	biological_process	0.6156	1	2	202	497	48611	Gh_A07G1603,Gh_D13G0686
GO:0033179	proton-transporting V-type ATPase, V0 domain	cellular_component	0.61701	1	1	202	229	48611	Gh_A11G2358
GO:0006974	cellular response to DNA damage stimulus	biological_process	0.61775	1	5	202	1276	48611	Gh_A11G2358,Gh_D13G0686,Gh_A05G3831,Gh_D01G2275,Gh_A07G1240
GO:0061695	transferase complex, transferring phosphorus-containing groups	cellular_component	0.62022	1	1	202	231	48611	Gh_A07G0876
GO:0019752	carboxylic acid metabolic process	biological_process	0.62109	1	8	202	2041	48611	Gh_A05G0700,Gh_A09G0362,Gh_D12G2422,Gh_D13G0686,Gh_D13G2069,Gh_A11G2358,Gh_A07G1603,Gh_A08G0871
GO:0051276	chromosome organization	biological_process	0.62355	1	3	202	768	48611	Gh_A05G3831,Gh_A11G0922,Gh_A11G2358
GO:0043436	oxoacid metabolic process	biological_process	0.62383	1	8	202	2046	48611	Gh_A09G0362,Gh_A05G0700,Gh_D12G2422,Gh_D13G0686,Gh_A08G0871,Gh_A07G1603,Gh_D13G2069,Gh_A11G2358
GO:1902494	catalytic complex	cellular_component	0.62644	1	7	202	1798	48611	Gh_A12G1892,Gh_D02G1538,Gh_D07G1578,Gh_A07G0876,Gh_D07G0576,Gh_D13G2339,Gh_D04G0317
GO:0009451	RNA modification	biological_process	0.62655	1	1	202	235	48611	Gh_D09G0615
GO:0045184	establishment of protein localization	biological_process	0.62666	1	9	202	2303	48611	Gh_A07G1608,Gh_D12G2711,Gh_Sca004751G01,Gh_D02G1649,Gh_D06G1345,Gh_D03G1781,Gh_A11G2358,Gh_D05G2734,Gh_D05G2242
GO:0022804	active transmembrane transporter activity	molecular_function	0.62768	1	4	202	1033	48611	Gh_A05G3831,Gh_D13G0686,Gh_D02G1620,Gh_D04G0583
GO:0006766	vitamin metabolic process	biological_process	0.62811	1	1	202	236	48611	Gh_D12G2711
GO:0006767	water-soluble vitamin metabolic process	biological_process	0.62811	1	1	202	236	48611	Gh_D12G2711
GO:0044257	cellular protein catabolic process	biological_process	0.62963	1	2	202	510	48611	Gh_A11G3013,Gh_D13G0686
GO:0051603	proteolysis involved in cellular protein catabolic process	biological_process	0.62963	1	2	202	510	48611	Gh_A11G3013,Gh_D13G0686
GO:0006082	organic acid metabolic process	biological_process	0.63146	1	8	202	2060	48611	Gh_A09G0362,Gh_A05G0700,Gh_D13G0686,Gh_D12G2422,Gh_A07G1603,Gh_A11G2358,Gh_D13G2069,Gh_A08G0871
GO:0048870	cell motility	biological_process	0.63277	1	1	202	239	48611	Gh_A11G2358
GO:0051674	localization of cell	biological_process	0.63277	1	1	202	239	48611	Gh_A11G2358
GO:0043623	cellular protein complex assembly	biological_process	0.63806	1	2	202	518	48611	Gh_A10G1038,Gh_A08G1015
GO:0000226	microtubule cytoskeleton organization	biological_process	0.64041	1	1	202	244	48611	Gh_A05G3831
GO:0015399	primary active transmembrane transporter activity	molecular_function	0.64222	1	2	202	522	48611	Gh_D04G0583,Gh_A05G3831
GO:0015405	P-P-bond-hydrolysis-driven transmembrane transporter activity	molecular_function	0.64222	1	2	202	522	48611	Gh_D04G0583,Gh_A05G3831
GO:0006505	GPI anchor metabolic process	biological_process	0.64936	1	1	202	250	48611	Gh_A11G2358
GO:0016765	transferase activity, transferring alkyl or aryl (other than methyl) groups	molecular_function	0.64936	1	1	202	250	48611	Gh_A11G2358
GO:0065008	regulation of biological quality	biological_process	0.65523	1	5	202	1332	48611	Gh_D10G1453,Gh_A04G1404,Gh_D02G1649,Gh_A11G2358,Gh_D08G1218
GO:0070838	divalent metal ion transport	biological_process	0.65665	1	1	202	255	48611	Gh_A11G2358
GO:0008104	protein localization	biological_process	0.65944	1	9	202	2368	48611	Gh_A11G2358,Gh_D06G1345,Gh_D03G1781,Gh_D05G2242,Gh_D05G2734,Gh_Sca004751G01,Gh_A07G1608,Gh_D12G2711,Gh_D02G1649
GO:0071822	protein complex subunit organization	biological_process	0.66322	1	3	202	815	48611	Gh_A10G1038,Gh_A08G1015,Gh_A05G0700
GO:0006633	fatty acid biosynthetic process	biological_process	0.6652	1	1	202	261	48611	Gh_D13G0686
GO:0008017	microtubule binding	molecular_function	0.6652	1	1	202	261	48611	Gh_A11G2403
GO:0006790	sulfur compound metabolic process	biological_process	0.6694	1	1	202	264	48611	Gh_D13G2069
GO:0032259	methylation	biological_process	0.6694	1	1	202	264	48611	Gh_D02G2152
GO:0033554	cellular response to stress	biological_process	0.66993	1	5	202	1355	48611	Gh_D13G0686,Gh_A05G3831,Gh_D01G2275,Gh_A07G1240,Gh_A11G2358
GO:0046148	pigment biosynthetic process	biological_process	0.67029	1	2	202	550	48611	Gh_D05G1075,Gh_D12G2422
GO:0006950	response to stress	biological_process	0.67121	1	11	202	2902	48611	Gh_D04G0317,Gh_A03G0296,Gh_A05G3831,Gh_A05G2374,Gh_A11G2358,Gh_D10G1880,Gh_A07G1240,Gh_D01G2275,Gh_D13G0686,Gh_D11G1826,Gh_A12G1240
GO:0044433	cytoplasmic vesicle part	cellular_component	0.67217	1	1	202	266	48611	Gh_D13G2339
GO:0006464	cellular protein modification process	biological_process	0.67259	1	17	202	4418	48611	Gh_A06G1129,Gh_D04G0576,Gh_A08G2132,Gh_A01G0842,Gh_A03G0296,Gh_A11G2358,Gh_D01G0370,Gh_D06G1866,Gh_A05G2494,Gh_Sca006711G02,Gh_D10G0130,Gh_A11G0922,Gh_D02G0503,Gh_D05G2242,Gh_D09G0587,Gh_A12G1475,Gh_A05G1034
GO:0036211	protein modification process	biological_process	0.67259	1	17	202	4418	48611	Gh_D10G0130,Gh_D02G0503,Gh_A11G0922,Gh_A05G1034,Gh_D09G0587,Gh_D05G2242,Gh_A12G1475,Gh_A05G2494,Gh_Sca006711G02,Gh_A03G0296,Gh_A11G2358,Gh_D01G0370,Gh_D06G1866,Gh_A06G1129,Gh_D04G0576,Gh_A08G2132,Gh_A01G0842
GO:0030163	protein catabolic process	biological_process	0.67511	1	2	202	555	48611	Gh_D13G0686,Gh_A11G3013
GO:0010605	negative regulation of macromolecule metabolic process	biological_process	0.67763	1	1	202	270	48611	Gh_D10G2202
GO:0042803	protein homodimerization activity	molecular_function	0.68033	1	1	202	272	48611	Gh_D05G2242
GO:0006813	potassium ion transport	biological_process	0.68168	1	1	202	273	48611	Gh_D07G1209
GO:0016192	vesicle-mediated transport	biological_process	0.68238	1	5	202	1375	48611	Gh_A05G0700,Gh_D01G1124,Gh_A11G2358,Gh_D03G1781,Gh_A07G1608
GO:0006270	DNA replication initiation	biological_process	0.68301	1	1	202	274	48611	Gh_D12G2711
GO:0008654	phospholipid biosynthetic process	biological_process	0.68301	1	1	202	274	48611	Gh_A11G2358
GO:0006778	porphyrin-containing compound metabolic process	biological_process	0.68831	1	2	202	569	48611	Gh_A13G1907,Gh_D12G2422
GO:0031301	integral component of organelle membrane	cellular_component	0.68961	1	1	202	279	48611	Gh_D05G0705
GO:0009108	coenzyme biosynthetic process	biological_process	0.6935	1	1	202	282	48611	Gh_A05G3831
GO:0046983	protein dimerization activity	molecular_function	0.69372	1	4	202	1126	48611	Gh_D05G2242,Gh_A11G0922,Gh_A05G3831,Gh_A11G2238
GO:0043565	sequence-specific DNA binding	molecular_function	0.6969	1	5	202	1399	48611	Gh_A11G2358,Gh_A07G0876,Gh_Sca005611G02,Gh_D13G0686,Gh_D13G1470
GO:0015631	tubulin binding	molecular_function	0.69734	1	1	202	285	48611	Gh_A11G2403
GO:0031410	cytoplasmic vesicle	cellular_component	0.70114	1	1	202	288	48611	Gh_D13G2339
GO:0004842	ubiquitin-protein transferase activity	molecular_function	0.70643	1	3	202	871	48611	Gh_D07G0576,Gh_D07G1578,Gh_A07G1608
GO:0019787	ubiquitin-like protein transferase activity	molecular_function	0.70643	1	3	202	871	48611	Gh_D07G0576,Gh_D07G1578,Gh_A07G1608
GO:0005618	cell wall	cellular_component	0.70858	1	1	202	294	48611	Gh_D08G0270
GO:0031300	intrinsic component of organelle membrane	cellular_component	0.70858	1	1	202	294	48611	Gh_D05G0705
GO:0032501	multicellular organismal process	biological_process	0.71254	1	4	202	1155	48611	Gh_D05G0815,Gh_D09G1694,Gh_A08G1015,Gh_A12G0777
GO:0031982	vesicle	cellular_component	0.71345	1	1	202	298	48611	Gh_D13G2339
GO:0042995	cell projection	cellular_component	0.71823	1	1	202	302	48611	Gh_A11G2358
GO:0071103	DNA conformation change	biological_process	0.72176	1	1	202	305	48611	Gh_A05G3831
GO:0072330	monocarboxylic acid biosynthetic process	biological_process	0.72176	1	1	202	305	48611	Gh_D13G0686
GO:0044430	cytoskeletal part	cellular_component	0.72361	1	2	202	609	48611	Gh_A05G3831,Gh_A12G1892
GO:0000152	nuclear ubiquitin ligase complex	cellular_component	0.72444	1	2	202	610	48611	Gh_D07G1578,Gh_D07G0576
GO:0005680	anaphase-promoting complex	cellular_component	0.72444	1	2	202	610	48611	Gh_D07G1578,Gh_D07G0576
GO:0015031	protein transport	biological_process	0.72659	1	8	202	2251	48611	Gh_D02G1649,Gh_A07G1608,Gh_D12G2711,Gh_Sca004751G01,Gh_D05G2734,Gh_D05G2242,Gh_D06G1345,Gh_D03G1781
GO:0045454	cell redox homeostasis	biological_process	0.7287	1	1	202	311	48611	Gh_D10G1453
GO:0072509	divalent inorganic cation transmembrane transporter activity	molecular_function	0.7287	1	1	202	311	48611	Gh_D02G1649
GO:0090150	establishment of protein localization to membrane	biological_process	0.7287	1	1	202	311	48611	Gh_A11G2358
GO:0009378	four-way junction helicase activity	molecular_function	0.73097	1	1	202	313	48611	Gh_A07G1240
GO:0033176	proton-transporting V-type ATPase complex	cellular_component	0.7321	1	1	202	314	48611	Gh_A11G2358
GO:0072657	protein localization to membrane	biological_process	0.73323	1	1	202	315	48611	Gh_A11G2358
GO:0072511	divalent inorganic cation transport	biological_process	0.73658	1	1	202	318	48611	Gh_A11G2358
GO:0030246	carbohydrate binding	molecular_function	0.73836	1	2	202	627	48611	Gh_A07G0166,Gh_A06G1129
GO:0016787	hydrolase activity	molecular_function	0.73971	1	38	202	9882	48611	Gh_D10G2202,Gh_A05G3831,Gh_D02G1685,Gh_A05G0716,Gh_D01G2275,Gh_A05G0841,Gh_A11G2403,Gh_D12G1823,Gh_A08G1584,Gh_D13G1464,Gh_D05G0815,Gh_A05G2246,Gh_Sca010487G03,Gh_Sca004751G01,Gh_A05G2494,Gh_Sca010487G02,Gh_A11G2663,Gh_A01G0843,Gh_A09G2323,Gh_A11G2358,Gh_D04G1996,Gh_A07G1240,Gh_D04G0576,Gh_D06G0902,Gh_D03G1091,Gh_D04G0583,Gh_A11G0922,Gh_D08G0270,Gh_A05G0978,Gh_A08G0871,Gh_D07G0510,Gh_A03G2036,Gh_…
GO:0044003	modification by symbiont of host morphology or physiology	biological_process	0.74206	1	1	202	323	48611	Gh_A04G1404
GO:0006261	DNA-dependent DNA replication	biological_process	0.7453	1	1	202	326	48611	Gh_D12G2711
GO:0003677	DNA binding	molecular_function	0.74813	1	24	202	6419	48611	Gh_A07G1240,Gh_A09G0281,Gh_D13G0686,Gh_A07G0876,Gh_D05G1158,Gh_D12G2711,Gh_A11G2663,Gh_D04G0317,Gh_D02G1093,Gh_A11G2238,Gh_A11G2358,Gh_D10G0292,Gh_A03G0149,Gh_D02G2152,Gh_A08G1584,Gh_Sca004751G01,Gh_A05G2494,Gh_D02G0790,Gh_D13G1470,Gh_A05G3831,Gh_D10G2202,Gh_D03G0184,Gh_Sca005611G02,Gh_A06G0406
GO:0005578	proteinaceous extracellular matrix	cellular_component	0.74849	1	1	202	329	48611	Gh_A11G2358
GO:0051817	modification of morphology or physiology of other organism involved in symbiotic interaction	biological_process	0.74849	1	1	202	329	48611	Gh_A04G1404
GO:0006310	DNA recombination	biological_process	0.7486	1	2	202	640	48611	Gh_A07G1240,Gh_A05G3831
GO:0033014	tetrapyrrole biosynthetic process	biological_process	0.74937	1	2	202	641	48611	Gh_D12G2422,Gh_D12G2711
GO:0046488	phosphatidylinositol metabolic process	biological_process	0.75165	1	1	202	332	48611	Gh_A11G2358
GO:0034622	cellular macromolecular complex assembly	biological_process	0.75549	1	2	202	649	48611	Gh_A10G1038,Gh_A08G1015
GO:0035821	modification of morphology or physiology of other organism	biological_process	0.76089	1	1	202	341	48611	Gh_A04G1404
GO:0003774	motor activity	molecular_function	0.76587	1	1	202	346	48611	Gh_A11G2403
GO:0004197	cysteine-type endopeptidase activity	molecular_function	0.76587	1	1	202	346	48611	Gh_A05G3831
GO:0006520	cellular amino acid metabolic process	biological_process	0.77092	1	4	202	1255	48611	Gh_A05G0700,Gh_D12G2422,Gh_A11G2358,Gh_D13G2069
GO:0012505	endomembrane system	cellular_component	0.77198	1	5	202	1538	48611	Gh_A05G3831,Gh_D05G0705,Gh_D13G0686,Gh_D12G2711,Gh_A11G2358
GO:0007010	cytoskeleton organization	biological_process	0.77235	1	2	202	672	48611	Gh_A05G0700,Gh_A05G3831
GO:0031461	cullin-RING ubiquitin ligase complex	cellular_component	0.77448	1	2	202	675	48611	Gh_D07G0576,Gh_D07G1578
GO:0071840	cellular component organization or biogenesis	biological_process	0.77565	1	13	202	3693	48611	Gh_D04G0583,Gh_A05G0700,Gh_D02G2152,Gh_A08G1015,Gh_A10G1038,Gh_A11G3033,Gh_A05G0716,Gh_A11G2358,Gh_D06G1600,Gh_A09G0411,Gh_A05G3831,Gh_D02G0503,Gh_A11G0922
GO:0048523	negative regulation of cellular process	biological_process	0.77927	1	1	202	360	48611	Gh_D10G2202
GO:0007049	cell cycle	biological_process	0.77935	1	4	202	1271	48611	Gh_A05G0716,Gh_A05G3831,Gh_D07G0576,Gh_D12G1932
GO:0031012	extracellular matrix	cellular_component	0.7802	1	1	202	361	48611	Gh_A11G2358
GO:0006650	glycerophospholipid metabolic process	biological_process	0.78205	1	1	202	363	48611	Gh_A11G2358
GO:0008134	transcription factor binding	molecular_function	0.78387	1	1	202	365	48611	Gh_A07G0938
GO:0009892	negative regulation of metabolic process	biological_process	0.78387	1	1	202	365	48611	Gh_D10G2202
GO:0016853	isomerase activity	molecular_function	0.78619	1	2	202	692	48611	Gh_D02G1219,Gh_A05G3831
GO:0007264	small GTPase mediated signal transduction	biological_process	0.7882	1	2	202	695	48611	Gh_A11G2358,Gh_D06G1866
GO:0070085	glycosylation	biological_process	0.79279	1	1	202	375	48611	Gh_D05G2242
GO:0006461	protein complex assembly	biological_process	0.79348	1	2	202	703	48611	Gh_A08G1015,Gh_A10G1038
GO:0070271	protein complex biogenesis	biological_process	0.79348	1	2	202	703	48611	Gh_A10G1038,Gh_A08G1015
GO:0005856	cytoskeleton	cellular_component	0.79608	1	2	202	707	48611	Gh_A05G3831,Gh_A12G1892
GO:0004812	aminoacyl-tRNA ligase activity	molecular_function	0.79711	1	1	202	380	48611	Gh_A11G2358
GO:0006418	tRNA aminoacylation for protein translation	biological_process	0.79711	1	1	202	380	48611	Gh_A11G2358
GO:0004674	protein serine/threonine kinase activity	molecular_function	0.80134	1	1	202	385	48611	Gh_Sca006711G02
GO:0046486	glycerolipid metabolic process	biological_process	0.80134	1	1	202	385	48611	Gh_A11G2358
GO:0015994	chlorophyll metabolic process	biological_process	0.80466	1	1	202	389	48611	Gh_A13G1907
GO:0016875	ligase activity, forming carbon-oxygen bonds	molecular_function	0.81034	1	1	202	396	48611	Gh_A11G2358
GO:0016876	ligase activity, forming aminoacyl-tRNA and related compounds	molecular_function	0.81034	1	1	202	396	48611	Gh_A11G2358
GO:0051649	establishment of localization in cell	biological_process	0.81195	1	8	202	2465	48611	Gh_D03G1781,Gh_A11G2358,Gh_D05G2242,Gh_A07G1608,Gh_D12G2711,Gh_Sca004751G01,Gh_D01G1124,Gh_D13G0686
GO:0043038	amino acid activation	biological_process	0.81273	1	1	202	399	48611	Gh_A11G2358
GO:0043039	tRNA aminoacylation	biological_process	0.81273	1	1	202	399	48611	Gh_A11G2358
GO:0006996	organelle organization	biological_process	0.81394	1	6	202	1915	48611	Gh_A05G0716,Gh_A11G3033,Gh_A05G3831,Gh_A11G0922,Gh_A05G0700,Gh_A11G2358
GO:0007059	chromosome segregation	biological_process	0.8197	1	1	202	408	48611	Gh_A05G3831
GO:0007275	multicellular organismal development	biological_process	0.82046	1	1	202	409	48611	Gh_A08G1015
GO:0065003	macromolecular complex assembly	biological_process	0.82165	1	2	202	749	48611	Gh_A08G1015,Gh_A10G1038
GO:1990234	transferase complex	cellular_component	0.82271	1	4	202	1362	48611	Gh_D04G0317,Gh_D07G0576,Gh_A07G0876,Gh_D07G1578
GO:0051188	cofactor biosynthetic process	biological_process	0.83007	1	2	202	764	48611	Gh_A05G3831,Gh_D12G2422
GO:0030117	membrane coat	cellular_component	0.83075	1	1	202	423	48611	Gh_A07G1608
GO:0048475	coated membrane	cellular_component	0.83075	1	1	202	423	48611	Gh_A07G1608
GO:0016879	ligase activity, forming carbon-nitrogen bonds	molecular_function	0.83498	1	1	202	429	48611	Gh_A05G0700
GO:0098588	bounding membrane of organelle	cellular_component	0.83639	1	3	202	1092	48611	Gh_A05G0716,Gh_D12G2711,Gh_A11G2358
GO:0005789	endoplasmic reticulum membrane	cellular_component	0.8418	1	1	202	439	48611	Gh_A11G2358
GO:0042175	nuclear outer membrane-endoplasmic reticulum membrane network	cellular_component	0.8418	1	1	202	439	48611	Gh_A11G2358
GO:0005515	protein binding	molecular_function	0.84182	1	43	202	11642	48611	Gh_D08G1927,Gh_D05G3040,Gh_A08G1015,Gh_D12G2711,Gh_A07G1608,Gh_A08G2132,Gh_D06G0894,Gh_D04G0583,Gh_A03G0296,Gh_D12G1363,Gh_A07G0938,Gh_D06G1866,Gh_A01G0843,Gh_D07G1578,Gh_A11G2358,Gh_A09G2247,Gh_A05G0716,Gh_A11G2403,Gh_A07G1965,Gh_D07G1209,Gh_D13G1464,Gh_A05G2494,Gh_D06G0759,Gh_A12G1475,Gh_A08G1668,Gh_D10G2202,Gh_A05G3831,Gh_D04G1859,Gh_D06G1600,Gh_D13G0686,Gh_D11G0664,Gh_D07G0576,Gh_A12G0777,Gh_…
GO:0005509	calcium ion binding	molecular_function	0.84228	1	2	202	787	48611	Gh_D05G2675,Gh_D10G0130
GO:0006457	protein folding	biological_process	0.84246	1	1	202	440	48611	Gh_D05G2242
GO:0030312	external encapsulating structure	cellular_component	0.84445	1	1	202	443	48611	Gh_D08G0270
GO:0051641	cellular localization	biological_process	0.84749	1	8	202	2576	48611	Gh_D03G1781,Gh_A11G2358,Gh_D05G2242,Gh_A07G1608,Gh_D12G2711,Gh_Sca004751G01,Gh_D01G1124,Gh_D13G0686
GO:0044432	endoplasmic reticulum part	cellular_component	0.85024	1	1	202	452	48611	Gh_A11G2358
GO:0005783	endoplasmic reticulum	cellular_component	0.8503	1	2	202	803	48611	Gh_A11G2358,Gh_D12G2711
GO:0006914	autophagy	biological_process	0.8515	1	1	202	454	48611	Gh_A11G2358
GO:0006779	porphyrin-containing compound biosynthetic process	biological_process	0.85704	1	1	202	463	48611	Gh_D12G2422
GO:0032403	protein complex binding	molecular_function	0.8612	1	1	202	470	48611	Gh_A11G2403
GO:0006644	phospholipid metabolic process	biological_process	0.86179	1	1	202	471	48611	Gh_A11G2358
GO:0008092	cytoskeletal protein binding	molecular_function	0.87135	1	2	202	849	48611	Gh_D13G1464,Gh_A11G2403
GO:0051301	cell division	biological_process	0.87616	1	1	202	497	48611	Gh_D12G1932
GO:0000151	ubiquitin ligase complex	cellular_component	0.87679	1	2	202	862	48611	Gh_D07G1578,Gh_D07G0576
GO:0016874	ligase activity	molecular_function	0.88769	1	3	202	1224	48611	Gh_A05G0700,Gh_D10G2202,Gh_A11G2358
GO:1902580	single-organism cellular localization	biological_process	0.89273	1	1	202	531	48611	Gh_A11G2358
GO:0006508	proteolysis	biological_process	0.89348	1	6	202	2170	48611	Gh_D13G2004,Gh_A13G1907,Gh_A11G3013,Gh_A05G2246,Gh_D04G1996,Gh_D13G0686
GO:0044421	extracellular region part	cellular_component	0.89761	1	1	202	542	48611	Gh_A11G2358
GO:0048519	negative regulation of biological process	biological_process	0.90511	1	1	202	560	48611	Gh_D10G2202
GO:0016043	cellular component organization	biological_process	0.90811	1	10	202	3402	48611	Gh_A11G0922,Gh_D02G0503,Gh_A05G3831,Gh_A11G2358,Gh_A05G0716,Gh_A11G3033,Gh_A05G0700,Gh_A08G1015,Gh_A10G1038,Gh_D04G0583
GO:0034613	cellular protein localization	biological_process	0.90856	1	5	202	1931	48611	Gh_D12G2711,Gh_A07G1608,Gh_Sca004751G01,Gh_A11G2358,Gh_D05G2242
GO:0070727	cellular macromolecule localization	biological_process	0.90856	1	5	202	1931	48611	Gh_D05G2242,Gh_A07G1608,Gh_D12G2711,Gh_Sca004751G01,Gh_A11G2358
GO:0022402	cell cycle process	biological_process	0.91713	1	1	202	592	48611	Gh_A05G3831
GO:0046873	metal ion transmembrane transporter activity	molecular_function	0.93793	1	2	202	1063	48611	Gh_D02G1649,Gh_D07G1209
GO:0052689	carboxylic ester hydrolase activity	molecular_function	0.94598	1	1	202	693	48611	Gh_A13G1907
GO:0006886	intracellular protein transport	biological_process	0.94608	1	4	202	1808	48611	Gh_A07G1608,Gh_D12G2711,Gh_Sca004751G01,Gh_D05G2242
GO:0046907	intracellular transport	biological_process	0.95151	1	5	202	2175	48611	Gh_D12G2711,Gh_A07G1608,Gh_Sca004751G01,Gh_D05G2242,Gh_D13G0686
GO:0006952	defense response	biological_process	0.96877	1	1	202	822	48611	Gh_D04G0317
GO:0030001	metal ion transport	biological_process	0.96903	1	2	202	1259	48611	Gh_A11G2358,Gh_D07G1209
GO:1902582	single-organism intracellular transport	biological_process	0.98824	1	1	202	1051	48611	Gh_D13G0686

## Sheet: Hypo
GO_accession	Description	Term_type	Over_represented_pValue	Corrected_pValue	DMR_item	DMR_list	Bg_item	Bg_list	DMR genes
GO:0071704	organic substance metabolic process	biological_process	1.2455e-06	0.0035653	211	351	23099	48611	Gh_D11G1714,Gh_A12G1766,Gh_A13G1944,Gh_D13G0226,Gh_D02G1569,Gh_D11G0563,Gh_A09G2289,Gh_A13G0128,Gh_A08G2132,Gh_A11G0261,Gh_A10G1127,Gh_D11G1797,Gh_A06G0783,Gh_D12G2735,Gh_D02G1026,Gh_A10G1099,Gh_A01G0669,Gh_D13G1319,Gh_A07G2294,Gh_A13G1954,Gh_A11G2902,Gh_A02G0044,Gh_D13G1983,Gh_D04G1994,Gh_A09G0965,Gh_D02G1140,Gh_A11G2492,Gh_Sca098321G01,Gh_A11G1097,Gh_A12G1073,Gh_A04G1093,Gh_A05G3412,Gh_A06G0430…
GO:0044238	primary metabolic process	biological_process	1.597e-06	0.0035653	204	351	22192	48611	Gh_A12G2234,Gh_Sca004981G04,Gh_A04G0147,Gh_A01G0725,Gh_D13G2389,Gh_D11G1816,Gh_D12G2681,Gh_D10G1893,Gh_A10G1819,Gh_D02G0593,Gh_D02G0057,Gh_D05G1911,Gh_A08G1954,Gh_D10G2457,Gh_D02G1815,Gh_D05G0127,Gh_D13G1425,Gh_A11G1095,Gh_D07G2317,Gh_A10G0336,Gh_A04G0975,Gh_A08G1995,Gh_D04G0172,Gh_A03G1496,Gh_A08G1859,Gh_D07G1063,Gh_D11G0849,Gh_D05G2756,Gh_A05G3033,Gh_A03G0338,Gh_A01G0073,Gh_D12G2520,Gh_D05G0929…
GO:0008152	metabolic process	biological_process	4.3563e-06	0.0064837	244	351	28164	48611	Gh_D13G1425,Gh_A11G1095,Gh_A10G0336,Gh_D07G2317,Gh_D02G0057,Gh_D08G0159,Gh_D02G1815,Gh_D10G2457,Gh_D05G0127,Gh_D05G1911,Gh_A08G1954,Gh_D04G1173,Gh_D13G2389,Gh_D12G2681,Gh_D11G1816,Gh_D10G1893,Gh_A08G2364,Gh_Sca006756G05,Gh_A10G1819,Gh_D02G0593,Gh_A04G0147,Gh_Sca004981G04,Gh_A12G2234,Gh_D04G0746,Gh_A01G0725,Gh_D03G0537,Gh_A13G1455,Gh_D08G0759,Gh_A10G2041,Gh_A03G0893,Gh_D10G2303,Gh_A03G1844,Gh_D12G…
GO:0044237	cellular metabolic process	biological_process	1.9374e-05	0.017329	193	351	21374	48611	Gh_D12G1399,Gh_A01G0316,Gh_D06G0907,Gh_D11G1830,Gh_A01G2143,Gh_D01G0919,Gh_A12G1650,Gh_A01G1798,Gh_D01G0409,Gh_A11G2494,Gh_A03G1923,Gh_D11G1901,Gh_D12G1990,Gh_D12G1747,Gh_D09G1575,Gh_A06G0365,Gh_A03G1427,Gh_A05G3517,Gh_A06G1500,Gh_D09G1748,Gh_D10G0643,Gh_D03G1234,Gh_D02G0069,Gh_A01G1533,Gh_D08G1786,Gh_D11G2433,Gh_A02G1419,Gh_D02G0743,Gh_D11G0471,Gh_A10G1919,Gh_A09G1320,Gh_A11G1003,Gh_A06G1633,Gh_…
GO:0044260	cellular macromolecule metabolic process	biological_process	1.9406e-05	0.017329	160	351	16946	48611	Gh_D13G2389,Gh_D10G1893,Gh_D12G2681,Gh_A10G1819,Gh_D02G0593,Gh_Sca004981G04,Gh_A04G0147,Gh_A12G2234,Gh_A01G0725,Gh_A11G1095,Gh_A10G0336,Gh_D02G0057,Gh_D05G0127,Gh_D05G1911,Gh_A08G1954,Gh_D07G1063,Gh_A05G3033,Gh_D05G2756,Gh_A08G1995,Gh_A08G1859,Gh_A03G1496,Gh_D04G0172,Gh_A13G1455,Gh_D08G0759,Gh_A03G0893,Gh_D10G2303,Gh_A03G1844,Gh_D12G2520,Gh_D05G0929,Gh_A03G0338,Gh_A01G0073,Gh_A11G2680,Gh_A08G2548…
GO:0043170	macromolecule metabolic process	biological_process	3.5738e-05	0.026595	169	351	18312	48611	Gh_A06G1664,Gh_D13G1991,Gh_D12G1820,Gh_A05G3267,Gh_A11G3090,Gh_A12G1509,Gh_D05G2629,Gh_A10G2072,Gh_A05G1831,Gh_A05G3224,Gh_D06G2197,Gh_D09G2200,Gh_A06G0430,Gh_A05G3412,Gh_A12G1073,Gh_A04G1093,Gh_A12G1604,Gh_D02G1699,Gh_A11G0408,Gh_D12G1543,Gh_D12G2386,Gh_D11G0709,Gh_A10G1099,Gh_D02G1026,Gh_A06G0783,Gh_A11G2902,Gh_D13G1319,Gh_A07G2294,Gh_D02G1140,Gh_A09G0965,Gh_D13G1983,Gh_A02G0044,Gh_A11G1097,Gh_…
GO:0004523	RNA-DNA hybrid ribonuclease activity	molecular_function	8.0094e-05	0.051089	13	351	498	48611	Gh_D03G1596,Gh_A03G1496,Gh_A11G2680,Gh_A04G1093,Gh_D10G2262,Gh_A03G0338,Gh_D07G1786,Gh_A01G0316,Gh_D07G0502,Gh_A10G2072,Gh_A10G1819,Gh_A06G0249,Gh_A11G1852
GO:0009058	biosynthetic process	biological_process	0.0001012	0.05164	129	351	13400	48611	Gh_D04G0459,Gh_A11G1852,Gh_A05G3413,Gh_Sca004717G07,Gh_D12G2739,Gh_D04G0694,Gh_D02G1676,Gh_D09G2149,Gh_D11G0471,Gh_A09G1320,Gh_A10G1919,Gh_A11G1003,Gh_D08G1786,Gh_D02G0743,Gh_D11G2433,Gh_D10G0643,Gh_D03G1234,Gh_A05G3517,Gh_D09G1748,Gh_D11G1901,Gh_D12G1990,Gh_D09G1575,Gh_D12G1747,Gh_A11G2494,Gh_D01G0409,Gh_A03G1923,Gh_A01G2143,Gh_D01G0919,Gh_A01G0316,Gh_D12G1399,Gh_D10G1485,Gh_D07G0502,Gh_A09G0916…
GO:0005544	calcium-dependent phospholipid binding	molecular_function	0.00010409	0.05164	4	351	34	48611	Gh_A11G0485,Gh_D10G1895,Gh_D11G0563,Gh_A13G0296
GO:0016891	endoribonuclease activity, producing 5'-phosphomonoesters	molecular_function	0.00019073	0.08516	13	351	544	48611	Gh_D07G1786,Gh_D10G2262,Gh_A03G0338,Gh_A01G0316,Gh_D03G1596,Gh_A03G1496,Gh_A04G1093,Gh_A11G2680,Gh_A11G1852,Gh_A06G0249,Gh_A10G2072,Gh_D07G0502,Gh_A10G1819
GO:0044249	cellular biosynthetic process	biological_process	0.0002505	0.10168	121	351	12644	48611	Gh_A10G1099,Gh_D08G1394,Gh_D01G0380,Gh_A11G2902,Gh_D12G2350,Gh_D13G1319,Gh_D12G1659,Gh_D07G1240,Gh_A09G0965,Gh_D13G1983,Gh_D10G0907,Gh_A12G1614,Gh_A12G0234,Gh_D12G0568,Gh_A11G1097,Gh_Sca098321G01,Gh_A11G2492,Gh_A01G2139,Gh_A12G1766,Gh_A03G0725,Gh_A05G3811,Gh_D10G2262,Gh_D13G0226,Gh_D07G0502,Gh_A13G0128,Gh_A09G0916,Gh_A11G0261,Gh_D10G1485,Gh_A12G1580,Gh_A12G0436,Gh_A05G3330,Gh_D12G2194,Gh_A10G1127…
GO:0008170	N-methyltransferase activity	molecular_function	0.00031115	0.10687	7	351	176	48611	Gh_A11G1852,Gh_D11G1797,Gh_D02G0593,Gh_A04G1093,Gh_D09G1575,Gh_A12G0371,Gh_A06G0430
GO:0004519	endonuclease activity	molecular_function	0.00043474	0.12319	17	351	919	48611	Gh_D03G1596,Gh_A03G1496,Gh_A01G0316,Gh_A10G1819,Gh_A10G2072,Gh_D10G2619,Gh_A04G1093,Gh_A11G2680,Gh_D07G1786,Gh_D04G0694,Gh_A03G0338,Gh_D10G2262,Gh_A11G0408,Gh_D07G0502,Gh_A11G1852,Gh_A06G0249,Gh_A07G1309
GO:0043531	ADP binding	molecular_function	0.00044749	0.12319	12	351	519	48611	Gh_A09G2289,Gh_A10G2072,Gh_A11G1852,Gh_Sca004717G07,Gh_A11G2680,Gh_D04G0172,Gh_D06G0081,Gh_A04G0147,Gh_A01G0316,Gh_D10G2262,Gh_D12G1753,Gh_A06G1633
GO:0004521	endoribonuclease activity	molecular_function	0.00045402	0.12319	13	351	596	48611	Gh_D03G1596,Gh_A03G1496,Gh_A04G1093,Gh_A11G2680,Gh_D07G1786,Gh_D10G2262,Gh_A03G0338,Gh_A01G0316,Gh_A10G2072,Gh_D07G0502,Gh_A10G1819,Gh_A11G1852,Gh_A06G0249
GO:0034645	cellular macromolecule biosynthetic process	biological_process	0.00046904	0.12319	100	351	10188	48611	Gh_D09G1748,Gh_A08G1954,Gh_D05G1911,Gh_A05G3517,Gh_D05G0127,Gh_D11G2433,Gh_D02G0743,Gh_D08G1786,Gh_A10G0336,Gh_D03G1234,Gh_D10G0643,Gh_D01G0919,Gh_A01G2143,Gh_A01G0725,Gh_A12G2234,Gh_D12G1399,Gh_A01G0316,Gh_Sca004981G04,Gh_A04G0147,Gh_D12G1747,Gh_A10G1819,Gh_A03G1923,Gh_A11G2494,Gh_D01G0409,Gh_D12G2681,Gh_D13G2389,Gh_A09G1177,Gh_A10G2021,Gh_D12G0062,Gh_A11G2680,Gh_A08G2548,Gh_A01G0073,Gh_D04G0694…
GO:0016893	endonuclease activity, active with either ribo- or deoxyribonucleic acids and producing 5'-phosphomonoesters	molecular_function	0.00054283	0.12347	14	351	687	48611	Gh_A10G1819,Gh_D07G0502,Gh_A10G2072,Gh_A11G1852,Gh_A07G1309,Gh_A06G0249,Gh_A04G1093,Gh_A11G2680,Gh_A03G1496,Gh_D03G1596,Gh_A01G0316,Gh_D07G1786,Gh_A03G0338,Gh_D10G2262
GO:0003724	RNA helicase activity	molecular_function	0.0005456	0.12347	10	351	385	48611	Gh_D04G0172,Gh_D10G2262,Gh_D11G1830,Gh_A09G2289,Gh_A10G2072,Gh_D07G0502,Gh_D03G0121,Gh_A03G0786,Gh_A11G1852,Gh_A05G3330
GO:1901576	organic substance biosynthetic process	biological_process	0.00055307	0.12347	121	351	12885	48611	Gh_D12G2350,Gh_A11G2902,Gh_D12G1659,Gh_D07G1240,Gh_D13G1319,Gh_D08G1394,Gh_A10G1099,Gh_D01G0380,Gh_D12G0568,Gh_A12G0234,Gh_A11G1097,Gh_A11G2492,Gh_Sca098321G01,Gh_D13G1983,Gh_A09G0965,Gh_A12G1614,Gh_D10G0907,Gh_D05G1836,Gh_D13G0226,Gh_D10G2262,Gh_D05G3816,Gh_A12G1766,Gh_A01G2139,Gh_A03G0725,Gh_A05G3811,Gh_D12G2194,Gh_A05G3330,Gh_A10G1127,Gh_A12G1580,Gh_A12G0436,Gh_D07G1596,Gh_D10G1485,Gh_D07G0502…
GO:0004540	ribonuclease activity	molecular_function	0.00061594	0.12506	14	351	696	48611	Gh_D03G1596,Gh_A03G1496,Gh_A11G2680,Gh_A04G1093,Gh_D10G2262,Gh_A03G0338,Gh_D07G1786,Gh_A01G0316,Gh_A10G2072,Gh_D07G0502,Gh_A10G1819,Gh_A07G0303,Gh_A06G0249,Gh_A11G1852
GO:0030554	adenyl nucleotide binding	molecular_function	0.00061621	0.12506	74	351	7096	48611	Gh_D03G0445,Gh_D13G1991,Gh_D06G2197,Gh_A10G2072,Gh_D01G0898,Gh_A06G0430,Gh_A05G3412,Gh_A12G1073,Gh_D12G1543,Gh_D11G0709,Gh_D12G1753,Gh_D12G1659,Gh_A06G0783,Gh_D02G1026,Gh_A13G0455,Gh_D13G1983,Gh_D02G1140,Gh_A03G0786,Gh_D10G2262,Gh_D06G0081,Gh_A05G3330,Gh_A10G1127,Gh_D11G1797,Gh_A12G0436,Gh_A02G0853,Gh_D10G1485,Gh_D07G0502,Gh_A13G2306,Gh_A08G2132,Gh_D02G1569,Gh_A09G2289,Gh_D03G1084,Gh_D11G1830,Gh_…
GO:0009059	macromolecule biosynthetic process	biological_process	0.00074776	0.14516	100	351	10323	48611	Gh_D09G1818,Gh_D11G1612,Gh_D09G2200,Gh_D11G2427,Gh_A10G2072,Gh_D05G2629,Gh_A05G1831,Gh_A05G3224,Gh_A12G1509,Gh_A06G1664,Gh_A05G3267,Gh_D12G1820,Gh_D02G2315,Gh_D12G2235,Gh_D12G2386,Gh_D11G3032,Gh_A06G0709,Gh_D12G1758,Gh_A11G0408,Gh_A12G1604,Gh_D02G1699,Gh_A04G1093,Gh_D01G2280,Gh_D12G0568,Gh_A11G1097,Gh_A12G0234,Gh_Sca098321G01,Gh_A11G2492,Gh_A09G0965,Gh_D13G1983,Gh_A12G1614,Gh_D12G2350,Gh_A11G2902…
GO:0005975	carbohydrate metabolic process	biological_process	0.00080673	0.14869	39	351	3162	48611	Gh_A05G3538,Gh_A11G1030,Gh_D12G2386,Gh_A01G1378,Gh_A10G0336,Gh_D08G1786,Gh_A04G0109,Gh_A07G1008,Gh_A05G3256,Gh_D12G1820,Gh_D13G1991,Gh_A01G0725,Gh_D02G1219,Gh_D11G1816,Gh_A01G1798,Gh_A03G1923,Gh_A09G0006,Gh_D05G2629,Gh_A01G0828,Gh_D10G2262,Gh_A03G0338,Gh_D04G0694,Gh_D10G1605,Gh_Sca005163G01,Gh_D04G0459,Gh_A11G1852,Gh_A10G1127,Gh_Sca004717G07,Gh_A12G1580,Gh_A09G2067,Gh_A05G3413,Gh_D11G3231,Gh_D12G…
GO:0016301	kinase activity	molecular_function	0.00083255	0.14869	49	351	4267	48611	Gh_D03G0445,Gh_D06G0907,Gh_D11G1830,Gh_D13G1991,Gh_A04G0034,Gh_A07G0465,Gh_D10G1893,Gh_D06G2197,Gh_D01G0898,Gh_A03G1427,Gh_A06G1500,Gh_A05G3412,Gh_A11G1095,Gh_A05G0092,Gh_D11G0709,Gh_D12G1543,Gh_A01G1533,Gh_A10G0336,Gh_A02G1419,Gh_D08G1786,Gh_D12G1659,Gh_A10G1919,Gh_D02G1026,Gh_A06G0783,Gh_D04G0172,Gh_A03G1496,Gh_D06G0092,Gh_D07G1063,Gh_A13G0455,Gh_D03G0401,Gh_D01G0516,Gh_A12G0091,Gh_D05G2756,Gh_…
GO:0005543	phospholipid binding	molecular_function	0.00089641	0.15394	6	351	153	48611	Gh_A09G1320,Gh_A13G0296,Gh_D11G0563,Gh_D12G2617,Gh_D10G1895,Gh_A11G0485
GO:0016772	transferase activity, transferring phosphorus-containing groups	molecular_function	0.0010058	0.16263	67	351	6386	48611	Gh_A03G1427,Gh_A06G1500,Gh_A11G1095,Gh_D02G0743,Gh_A02G1419,Gh_D08G1786,Gh_A01G1533,Gh_A10G0336,Gh_D06G0907,Gh_D11G1830,Gh_A04G0147,Gh_A07G0465,Gh_A04G0034,Gh_A01G1798,Gh_D10G1893,Gh_A10G1819,Gh_A03G0338,Gh_D05G0929,Gh_D12G2520,Gh_D12G0062,Gh_A11G2680,Gh_D09G2481,Gh_A11G1852,Gh_D10G2303,Gh_A03G0893,Gh_A10G1919,Gh_A03G1496,Gh_D04G0172,Gh_D07G1063,Gh_D03G0401,Gh_D01G0516,Gh_D06G0092,Gh_D03G0121,Gh_…
GO:0004386	helicase activity	molecular_function	0.0010408	0.16263	18	351	1085	48611	Gh_D03G0121,Gh_D01G0898,Gh_A03G0786,Gh_A10G2072,Gh_A12G1650,Gh_D04G0172,Gh_A06G1633,Gh_D11G1830,Gh_A01G0316,Gh_D12G1399,Gh_A04G0147,Gh_D07G0502,Gh_A13G2306,Gh_A09G2289,Gh_A05G3330,Gh_A11G1852,Gh_A11G2680,Gh_D10G2262
GO:0006796	phosphate-containing compound metabolic process	biological_process	0.001089	0.16263	57	351	5235	48611	Gh_A02G1419,Gh_D07G2317,Gh_D08G1786,Gh_A01G1533,Gh_A10G0336,Gh_D12G1543,Gh_D12G2386,Gh_D13G1425,Gh_A11G1095,Gh_D11G0709,Gh_A06G1500,Gh_A05G3412,Gh_A03G1427,Gh_D09G1575,Gh_A12G1684,Gh_D11G1901,Gh_D06G2197,Gh_A01G1798,Gh_D10G1893,Gh_D13G1991,Gh_D10G0665,Gh_D06G0907,Gh_D03G0445,Gh_A08G2132,Gh_A03G0893,Gh_D02G1569,Gh_D08G0759,Gh_Sca004717G07,Gh_D12G2194,Gh_A10G1127,Gh_D09G2481,Gh_A05G3330,Gh_A11G1852…
GO:0016740	transferase activity	molecular_function	0.0010927	0.16263	104	351	10940	48611	Gh_A01G0669,Gh_D12G1659,Gh_D07G1240,Gh_A06G0783,Gh_D11G0831,Gh_D01G1128,Gh_D02G1026,Gh_A13G0455,Gh_A11G1097,Gh_A12G0234,Gh_Sca098321G01,Gh_D13G1983,Gh_D07G1636,Gh_D02G1140,Gh_A02G0044,Gh_D03G0476,Gh_A12G0091,Gh_D10G2262,Gh_A05G2774,Gh_D11G1714,Gh_A05G3811,Gh_A10G1127,Gh_A05G3330,Gh_A12G1580,Gh_D11G1797,Gh_A12G0436,Gh_A02G0853,Gh_D07G0502,Gh_A08G2132,Gh_D05G2565,Gh_D02G1569,Gh_D03G0445,Gh_D11G2040…
GO:0006793	phosphorus metabolic process	biological_process	0.0011587	0.16518	57	351	5249	48611	Gh_D13G1991,Gh_D03G0445,Gh_D10G0665,Gh_D06G0907,Gh_D11G1901,Gh_A12G1684,Gh_D09G1575,Gh_A01G1798,Gh_D10G1893,Gh_D06G2197,Gh_A05G3412,Gh_A06G1500,Gh_A03G1427,Gh_A01G1533,Gh_A10G0336,Gh_A02G1419,Gh_D08G1786,Gh_D07G2317,Gh_A11G1095,Gh_D13G1425,Gh_D11G0709,Gh_D12G1543,Gh_D12G2386,Gh_D02G1026,Gh_A06G0783,Gh_A03G1496,Gh_D12G1659,Gh_A11G1003,Gh_A08G1995,Gh_A03G1679,Gh_D02G1140,Gh_D05G2756,Gh_D04G1994,Gh_…
GO:0017076	purine nucleotide binding	molecular_function	0.0011838	0.16518	78	351	7746	48611	Gh_A02G1419,Gh_D02G2420,Gh_D08G1786,Gh_D13G1410,Gh_A01G1533,Gh_A10G0336,Gh_A11G1095,Gh_D13G1425,Gh_D09G1748,Gh_D13G0101,Gh_D05G0127,Gh_A03G1427,Gh_A13G0368,Gh_D10G1893,Gh_A12G1650,Gh_A05G0517,Gh_A04G0034,Gh_D04G0746,Gh_D06G0907,Gh_D11G1830,Gh_D03G1084,Gh_A12G2234,Gh_D12G1399,Gh_A01G0316,Gh_A04G0147,Gh_A09G1580,Gh_A03G0893,Gh_Sca004717G07,Gh_D09G2481,Gh_A11G1852,Gh_A09G1177,Gh_D12G0062,Gh_A11G2680…
GO:0016310	phosphorylation	biological_process	0.0014481	0.19593	42	351	3595	48611	Gh_A01G1798,Gh_D10G1893,Gh_D06G2197,Gh_D09G1575,Gh_A12G1684,Gh_D03G0445,Gh_D06G0907,Gh_D13G1991,Gh_D11G0709,Gh_A11G1095,Gh_D12G1543,Gh_A10G0336,Gh_A01G1533,Gh_D08G1786,Gh_A02G1419,Gh_A03G1427,Gh_A05G3412,Gh_A06G1500,Gh_D06G0092,Gh_D01G0516,Gh_D07G1063,Gh_A13G0455,Gh_D13G1983,Gh_D10G1895,Gh_D02G1140,Gh_D05G2756,Gh_D12G1659,Gh_A08G1995,Gh_A03G1496,Gh_A06G0783,Gh_D02G1026,Gh_A02G0853,Gh_A10G1127,Gh_…
GO:0050896	response to stimulus	biological_process	0.0015124	0.19594	64	351	6132	48611	Gh_D03G0121,Gh_A05G3033,Gh_D03G0135,Gh_A06G1633,Gh_A03G1496,Gh_A03G0410,Gh_D04G0172,Gh_D02G1676,Gh_A09G0594,Gh_Sca004717G07,Gh_A11G1852,Gh_Sca005163G01,Gh_D04G0694,Gh_D12G2739,Gh_A09G1177,Gh_D12G0062,Gh_A07G1553,Gh_A11G2680,Gh_D01G0409,Gh_A10G1819,Gh_D11G1830,Gh_A01G0316,Gh_D12G1399,Gh_A04G0147,Gh_Sca004981G04,Gh_A05G0517,Gh_D01G0919,Gh_A13G0479,Gh_D11G1068,Gh_D04G0746,Gh_D05G3925,Gh_D01G1458,Gh_…
GO:0003924	GTPase activity	molecular_function	0.0015359	0.19594	16	351	942	48611	Gh_D10G2262,Gh_A09G1177,Gh_D13G0101,Gh_A05G3330,Gh_A11G1852,Gh_D07G0502,Gh_D02G2420,Gh_D10G1485,Gh_D13G1410,Gh_D11G1830,Gh_A01G0316,Gh_A05G0517,Gh_D04G0172,Gh_A10G2072,Gh_D03G0121,Gh_A03G0786
GO:0051716	cellular response to stimulus	biological_process	0.0016975	0.20513	47	351	4187	48611	Gh_D01G0409,Gh_A08G0612,Gh_D01G0898,Gh_A10G2072,Gh_A10G1819,Gh_D11G1830,Gh_D12G1399,Gh_A01G0316,Gh_A04G0147,Gh_D01G0919,Gh_A05G0517,Gh_A13G0479,Gh_A13G1386,Gh_D11G1068,Gh_D13G1410,Gh_A10G0336,Gh_A11G0408,Gh_D09G1748,Gh_D13G0101,Gh_A04G1093,Gh_A12G1073,Gh_D03G0121,Gh_D13G1983,Gh_A12G0091,Gh_D03G0135,Gh_A05G3033,Gh_A06G1633,Gh_A11G2902,Gh_A01G0417,Gh_D04G0172,Gh_D12G2354,Gh_A03G1496,Gh_D02G1676,Gh_…
GO:0010467	gene expression	biological_process	0.0016998	0.20513	90	351	9324	48611	Gh_D12G2739,Gh_A01G0073,Gh_A08G2548,Gh_A11G2680,Gh_A10G2021,Gh_A11G1852,Gh_A13G1455,Gh_D08G0759,Gh_D10G2303,Gh_D11G0471,Gh_A10G1919,Gh_A09G1320,Gh_A08G1995,Gh_D02G1676,Gh_A08G1859,Gh_A03G1496,Gh_D05G0127,Gh_D09G1748,Gh_A08G1954,Gh_D05G1911,Gh_A05G3517,Gh_D10G0643,Gh_D03G1234,Gh_D02G0069,Gh_D02G0743,Gh_D11G2433,Gh_A01G0316,Gh_A01G1946,Gh_A04G0147,Gh_Sca004981G04,Gh_A12G2234,Gh_A01G0725,Gh_D01G0919…
GO:0043168	anion binding	molecular_function	0.0017708	0.20555	85	351	8717	48611	Gh_A12G1073,Gh_A04G1093,Gh_A05G3412,Gh_A06G0430,Gh_D11G0709,Gh_D12G1543,Gh_A13G0296,Gh_D03G0445,Gh_D10G0665,Gh_D13G1991,Gh_D06G2197,Gh_D12G2617,Gh_D01G0898,Gh_A10G2072,Gh_D10G2262,Gh_D06G0081,Gh_A02G0853,Gh_A05G3330,Gh_A10G1127,Gh_D11G1797,Gh_A12G0436,Gh_D02G1569,Gh_D11G0563,Gh_A09G2289,Gh_D10G1485,Gh_A08G2132,Gh_D07G0502,Gh_A13G2306,Gh_D12G1659,Gh_D12G1753,Gh_A06G0783,Gh_D02G1026,Gh_A13G0455,Gh_…
GO:0007165	signal transduction	biological_process	0.0018371	0.20555	36	351	2981	48611	Gh_D13G1983,Gh_A05G3033,Gh_A12G0091,Gh_A11G2902,Gh_D04G0172,Gh_A03G1496,Gh_D12G2354,Gh_A01G0417,Gh_A09G0594,Gh_D02G1676,Gh_A05G3330,Gh_A10G1127,Gh_Sca004717G07,Gh_A11G1852,Gh_Sca005163G01,Gh_D10G1485,Gh_D07G0502,Gh_D04G0694,Gh_A12G1766,Gh_D12G0062,Gh_A09G1177,Gh_A11G2680,Gh_D01G0409,Gh_A08G0612,Gh_A10G2072,Gh_A10G1819,Gh_A01G0316,Gh_A13G1386,Gh_A13G0479,Gh_A05G0517,Gh_D01G0919,Gh_D11G1068,Gh_A10G…
GO:0004017	adenylate kinase activity	molecular_function	0.0018874	0.20555	3	351	34	48611	Gh_A05G0092,Gh_A10G1919,Gh_A07G0465
GO:0031369	translation initiation factor binding	molecular_function	0.0018874	0.20555	3	351	34	48611	Gh_A05G3224,Gh_D01G0919,Gh_A11G1852
GO:0003824	catalytic activity	molecular_function	0.0022307	0.22028	211	351	25517	48611	Gh_D03G0377,Gh_A10G0336,Gh_D02G2420,Gh_D07G2317,Gh_D13G1425,Gh_A11G1095,Gh_D10G2457,Gh_D08G0159,Gh_D02G0057,Gh_D02G0593,Gh_A10G1819,Gh_D10G1893,Gh_D12G2681,Gh_D11G1816,Gh_A08G2364,Gh_A01G0725,Gh_D04G0746,Gh_D11G1068,Gh_D02G1629,Gh_A05G0517,Gh_D03G0537,Gh_A04G0147,Gh_Sca004981G04,Gh_A07G1809,Gh_A12G2234,Gh_A03G0893,Gh_A10G2041,Gh_D08G0759,Gh_A03G1844,Gh_D10G2303,Gh_A13G1455,Gh_A11G2680,Gh_A09G1177…
GO:0004181	metallocarboxypeptidase activity	molecular_function	0.0022479	0.22028	2	351	10	48611	Gh_A09G1177,Gh_A01G0725
GO:0032559	adenyl ribonucleotide binding	molecular_function	0.0022855	0.22028	70	351	6958	48611	Gh_A12G1073,Gh_A06G0430,Gh_A05G3412,Gh_D11G0709,Gh_D12G1543,Gh_D03G0445,Gh_D13G1991,Gh_D06G2197,Gh_D01G0898,Gh_A10G2072,Gh_D10G2262,Gh_D06G0081,Gh_A02G0853,Gh_A12G0436,Gh_D11G1797,Gh_A05G3330,Gh_A10G1127,Gh_A09G2289,Gh_D02G1569,Gh_D07G0502,Gh_A13G2306,Gh_A08G2132,Gh_D10G1485,Gh_D12G1659,Gh_D12G1753,Gh_D02G1026,Gh_A06G0783,Gh_A13G0455,Gh_A03G0786,Gh_D02G1140,Gh_D13G1983,Gh_A13G0368,Gh_A03G1427,Gh_…
GO:0044700	single organism signaling	biological_process	0.0022927	0.22028	36	351	3021	48611	Gh_A01G0316,Gh_A13G1386,Gh_A13G0479,Gh_D01G0919,Gh_A05G0517,Gh_D11G1068,Gh_D01G0409,Gh_A08G0612,Gh_A10G2072,Gh_A10G1819,Gh_D13G0101,Gh_A04G1093,Gh_A10G0336,Gh_D13G1410,Gh_A11G2902,Gh_A03G1496,Gh_D04G0172,Gh_D12G2354,Gh_A01G0417,Gh_A09G0594,Gh_D02G1676,Gh_D13G1983,Gh_A05G3033,Gh_A12G0091,Gh_D04G0694,Gh_D12G0062,Gh_A12G1766,Gh_A09G1177,Gh_A11G2680,Gh_A05G3330,Gh_A10G1127,Gh_Sca004717G07,Gh_A11G1852…
GO:0023052	signaling	biological_process	0.0023689	0.22028	36	351	3027	48611	Gh_A10G2072,Gh_A10G1819,Gh_D01G0409,Gh_A08G0612,Gh_D01G0919,Gh_A05G0517,Gh_A13G1386,Gh_A13G0479,Gh_D11G1068,Gh_A01G0316,Gh_D13G1410,Gh_A10G0336,Gh_D13G0101,Gh_A04G1093,Gh_D13G1983,Gh_A12G0091,Gh_A05G3033,Gh_A01G0417,Gh_A03G1496,Gh_D12G2354,Gh_D04G0172,Gh_D02G1676,Gh_A09G0594,Gh_A11G2902,Gh_D07G0502,Gh_D10G1485,Gh_Sca004717G07,Gh_A10G1127,Gh_A05G3330,Gh_Sca005163G01,Gh_A11G1852,Gh_A09G1177,Gh_A12G…
GO:0019201	nucleotide kinase activity	molecular_function	0.002412	0.22028	3	351	37	48611	Gh_A10G1919,Gh_A05G0092,Gh_A07G0465
GO:0007154	cell communication	biological_process	0.0024984	0.22028	38	351	3257	48611	Gh_A12G1766,Gh_D12G0062,Gh_A09G1177,Gh_A11G2680,Gh_D04G0694,Gh_D10G1485,Gh_D07G0502,Gh_A05G3330,Gh_A10G1127,Gh_Sca004717G07,Gh_Sca005163G01,Gh_A11G1852,Gh_D04G0172,Gh_D12G2354,Gh_A03G1496,Gh_A01G0417,Gh_A09G0594,Gh_D02G1676,Gh_A11G2902,Gh_D13G1983,Gh_A05G3033,Gh_A12G0091,Gh_D13G0101,Gh_A04G1093,Gh_A03G1427,Gh_A10G0336,Gh_D13G1410,Gh_D12G1543,Gh_A13G1386,Gh_A13G0479,Gh_D01G0919,Gh_A05G0517,Gh_D11G…
GO:0065007	biological regulation	biological_process	0.0025557	0.22028	90	351	9451	48611	Gh_D11G2433,Gh_D02G0743,Gh_D13G1410,Gh_A10G0336,Gh_D10G0643,Gh_A08G1954,Gh_D13G0101,Gh_A06G1500,Gh_A05G3517,Gh_D05G0127,Gh_D12G1747,Gh_A10G1819,Gh_D01G0409,Gh_D04G1173,Gh_A05G0517,Gh_D01G0919,Gh_A13G0479,Gh_D04G0746,Gh_D11G1068,Gh_A12G2234,Gh_A01G1946,Gh_A01G0316,Gh_Sca004981G04,Gh_A11G1511,Gh_A12G2648,Gh_A13G1455,Gh_Sca004717G07,Gh_Sca005163G01,Gh_A11G1852,Gh_A09G1177,Gh_D12G0062,Gh_A10G2021,Gh_…
GO:0016278	lysine N-methyltransferase activity	molecular_function	0.0026148	0.22028	4	351	79	48611	Gh_A11G1852,Gh_A04G1093,Gh_D09G1575,Gh_A12G0371
GO:0016279	protein-lysine N-methyltransferase activity	molecular_function	0.0026148	0.22028	4	351	79	48611	Gh_A11G1852,Gh_D09G1575,Gh_A12G0371,Gh_A04G1093
GO:0018024	histone-lysine N-methyltransferase activity	molecular_function	0.0026148	0.22028	4	351	79	48611	Gh_A12G0371,Gh_D09G1575,Gh_A04G1093,Gh_A11G1852
GO:0042054	histone methyltransferase activity	molecular_function	0.0026148	0.22028	4	351	79	48611	Gh_A12G0371,Gh_D09G1575,Gh_A04G1093,Gh_A11G1852
GO:0008235	metalloexopeptidase activity	molecular_function	0.0027343	0.22609	2	351	11	48611	Gh_A09G1177,Gh_A01G0725
GO:0006139	nucleobase-containing compound metabolic process	biological_process	0.0027956	0.22696	109	351	11887	48611	Gh_D02G0069,Gh_D03G1234,Gh_D13G1425,Gh_D10G0643,Gh_D02G0743,Gh_D11G2433,Gh_D07G2317,Gh_A08G1954,Gh_D09G1748,Gh_A05G3517,Gh_D05G1911,Gh_D05G0127,Gh_A11G2494,Gh_D01G0409,Gh_A01G1798,Gh_D13G2389,Gh_D09G1575,Gh_D12G1747,Gh_D02G0593,Gh_A10G1819,Gh_D11G1901,Gh_D11G1830,Gh_A12G2234,Gh_A01G0316,Gh_D12G1399,Gh_A04G0147,Gh_Sca004981G04,Gh_D01G0919,Gh_A12G1650,Gh_Sca004717G07,Gh_A13G1455,Gh_A11G1852,Gh_D10G…
GO:0070069	cytochrome complex	cellular_component	0.0028754	0.22926	5	351	133	48611	Gh_A13G1944,Gh_A12G0436,Gh_A01G1256,Gh_D11G1901,Gh_A04G1093
GO:0044267	cellular protein metabolic process	biological_process	0.0029446	0.23066	74	351	7516	48611	Gh_A03G0893,Gh_A11G1852,Gh_D09G2481,Gh_A11G2680,Gh_D05G0929,Gh_D12G2520,Gh_D12G2739,Gh_A03G0338,Gh_D05G2756,Gh_D10G1895,Gh_D06G0092,Gh_D07G1063,Gh_D01G0516,Gh_A08G1859,Gh_A03G1496,Gh_A08G1995,Gh_A09G1320,Gh_A01G1533,Gh_A10G0336,Gh_A02G1419,Gh_D08G1786,Gh_A11G1095,Gh_D09G1748,Gh_A06G1500,Gh_A03G1427,Gh_D02G0057,Gh_D02G0593,Gh_D12G2681,Gh_D10G1893,Gh_A03G1923,Gh_A01G0725,Gh_D01G0919,Gh_A01G2143,Gh_…
GO:0009611	response to wounding	biological_process	0.0031329	0.24118	6	351	196	48611	Gh_D07G0502,Gh_D03G0121,Gh_D04G0746,Gh_A11G2680,Gh_D01G2280,Gh_A09G0853
GO:0016901	oxidoreductase activity, acting on the CH-OH group of donors, quinone or similar compound as acceptor	molecular_function	0.0032656	0.24713	2	351	12	48611	Gh_A04G1093,Gh_A11G1852
GO:0003964	RNA-directed DNA polymerase activity	molecular_function	0.003408	0.2484	12	351	661	48611	Gh_A04G0147,Gh_A03G0338,Gh_D10G2262,Gh_A11G2680,Gh_A03G1496,Gh_A11G1852,Gh_A12G0436,Gh_A10G1819,Gh_A05G3033,Gh_A10G2072,Gh_D11G2427,Gh_D07G0502
GO:0006278	RNA-dependent DNA replication	biological_process	0.0034905	0.2484	12	351	663	48611	Gh_A03G1496,Gh_A11G2680,Gh_A03G0338,Gh_D10G2262,Gh_A04G0147,Gh_D07G0502,Gh_D11G2427,Gh_A10G2072,Gh_A10G1819,Gh_A05G3033,Gh_A12G0436,Gh_A11G1852
GO:0008121	ubiquinol-cytochrome-c reductase activity	molecular_function	0.0035531	0.2484	4	351	86	48611	Gh_A11G0408,Gh_A07G1317,Gh_A04G0147,Gh_D11G0471
GO:0016681	oxidoreductase activity, acting on diphenols and related substances as donors, cytochrome as acceptor	molecular_function	0.0035531	0.2484	4	351	86	48611	Gh_A07G1317,Gh_A04G0147,Gh_D11G0471,Gh_A11G0408
GO:0006281	DNA repair	biological_process	0.0035653	0.2484	18	351	1217	48611	Gh_D10G2262,Gh_D04G0694,Gh_A12G1073,Gh_D09G1748,Gh_A11G1852,Gh_A05G3330,Gh_A11G0408,Gh_D10G1485,Gh_D07G0502,Gh_A04G0147,Gh_A01G0316,Gh_D12G1399,Gh_D11G1830,Gh_A06G1633,Gh_D04G0172,Gh_D03G0135,Gh_D01G0898,Gh_D03G0121
GO:0001883	purine nucleoside binding	molecular_function	0.0037274	0.2484	74	351	7586	48611	Gh_A12G1073,Gh_A06G0430,Gh_A05G3412,Gh_D11G0709,Gh_D12G1543,Gh_D13G1991,Gh_D03G0445,Gh_D01G0898,Gh_A10G2072,Gh_D06G2197,Gh_D06G0081,Gh_D10G2262,Gh_D02G1569,Gh_A09G2289,Gh_D10G1485,Gh_A13G2306,Gh_D07G0502,Gh_A08G2132,Gh_A02G0853,Gh_A05G3330,Gh_A10G1127,Gh_A12G0436,Gh_D11G1797,Gh_A06G0783,Gh_D02G1026,Gh_D12G1659,Gh_D12G1753,Gh_D13G1983,Gh_D02G1140,Gh_A03G0786,Gh_A13G0455,Gh_D13G0101,Gh_D09G1748,Gh_…
GO:0032549	ribonucleoside binding	molecular_function	0.0037274	0.2484	74	351	7586	48611	Gh_D06G0081,Gh_D10G2262,Gh_A09G2289,Gh_D02G1569,Gh_A08G2132,Gh_D07G0502,Gh_A13G2306,Gh_D10G1485,Gh_A02G0853,Gh_A12G0436,Gh_D11G1797,Gh_A05G3330,Gh_A10G1127,Gh_D02G1026,Gh_A06G0783,Gh_D12G1659,Gh_D12G1753,Gh_D02G1140,Gh_A03G0786,Gh_D13G1983,Gh_A13G0455,Gh_A12G1073,Gh_A05G3412,Gh_A06G0430,Gh_D11G0709,Gh_D12G1543,Gh_D13G1991,Gh_D03G0445,Gh_A10G2072,Gh_D01G0898,Gh_D06G2197,Gh_A11G2680,Gh_A09G1177,Gh_…
GO:0032550	purine ribonucleoside binding	molecular_function	0.0037274	0.2484	74	351	7586	48611	Gh_A12G2234,Gh_D06G0907,Gh_D11G1830,Gh_D12G1399,Gh_A01G0316,Gh_A09G1580,Gh_A04G0147,Gh_A12G1650,Gh_A05G0517,Gh_A04G0034,Gh_D10G1893,Gh_A03G1427,Gh_A13G0368,Gh_D13G0101,Gh_D09G1748,Gh_A11G1095,Gh_D13G1425,Gh_D02G2420,Gh_A02G1419,Gh_D08G1786,Gh_D13G1410,Gh_A01G1533,Gh_A10G0336,Gh_A06G1633,Gh_A09G1320,Gh_A08G1995,Gh_D04G0172,Gh_D07G1063,Gh_D03G0401,Gh_D01G0516,Gh_D06G0092,Gh_D05G2756,Gh_D03G0121,Gh_…
GO:0032555	purine ribonucleotide binding	molecular_function	0.0038402	0.24876	74	351	7595	48611	Gh_D11G0709,Gh_D12G1543,Gh_A12G1073,Gh_A05G3412,Gh_A06G0430,Gh_D06G2197,Gh_D01G0898,Gh_A10G2072,Gh_D03G0445,Gh_D13G1991,Gh_A02G0853,Gh_A05G3330,Gh_A10G1127,Gh_D11G1797,Gh_A12G0436,Gh_D02G1569,Gh_A09G2289,Gh_D10G1485,Gh_A13G2306,Gh_D07G0502,Gh_A08G2132,Gh_D10G2262,Gh_D06G0081,Gh_A13G0455,Gh_D13G1983,Gh_D02G1140,Gh_A03G0786,Gh_D12G1659,Gh_D12G1753,Gh_A06G0783,Gh_D02G1026,Gh_A11G1095,Gh_D13G1425,Gh_…
GO:0030054	cell junction	cellular_component	0.0038581	0.24876	4	351	88	48611	Gh_A03G1496,Gh_A09G0594,Gh_A04G1093,Gh_A11G1852
GO:0006807	nitrogen compound metabolic process	biological_process	0.003914	0.24876	131	351	14870	48611	Gh_D01G0898,Gh_A12G1684,Gh_D11G2427,Gh_D11G1612,Gh_D09G1818,Gh_D09G1891,Gh_D02G2315,Gh_D10G0456,Gh_D10G0665,Gh_D12G1758,Gh_D02G2284,Gh_D12G2235,Gh_A06G0709,Gh_D11G3032,Gh_D01G2280,Gh_D05G1836,Gh_A12G1614,Gh_A12G0234,Gh_D12G0568,Gh_D01G0380,Gh_D08G1394,Gh_D07G1240,Gh_D12G2350,Gh_D07G0502,Gh_D10G1485,Gh_A07G1309,Gh_D07G1596,Gh_A12G0436,Gh_D12G2194,Gh_A05G3330,Gh_A05G3811,Gh_A03G0725,Gh_D12G1468,Gh_…
GO:0000166	nucleotide binding	molecular_function	0.0040113	0.24876	83	351	8722	48611	Gh_D04G0172,Gh_D02G1676,Gh_A06G1633,Gh_A08G1995,Gh_A09G1320,Gh_D05G2756,Gh_D03G0121,Gh_D10G1895,Gh_D03G0401,Gh_D07G1063,Gh_D01G0516,Gh_D06G0092,Gh_A09G1177,Gh_D12G0062,Gh_A11G2680,Gh_A03G0338,Gh_D05G0929,Gh_D12G2520,Gh_A03G0893,Gh_D08G0759,Gh_Sca004717G07,Gh_D09G2481,Gh_A11G1852,Gh_A05G0517,Gh_A12G1650,Gh_A04G0034,Gh_D04G0746,Gh_A12G2234,Gh_D11G1830,Gh_D06G0907,Gh_D03G1084,Gh_D12G1399,Gh_A01G0316…
GO:1901265	nucleoside phosphate binding	molecular_function	0.0040113	0.24876	83	351	8722	48611	Gh_D06G2197,Gh_A10G2072,Gh_D01G0898,Gh_D10G0665,Gh_D03G0445,Gh_D13G1991,Gh_D12G1543,Gh_D11G0709,Gh_A06G0430,Gh_A05G3412,Gh_A04G1093,Gh_A12G1073,Gh_A13G0455,Gh_A06G0302,Gh_A03G0786,Gh_D02G1140,Gh_D13G1983,Gh_D12G1753,Gh_D12G1659,Gh_D02G1026,Gh_A06G0783,Gh_A12G0436,Gh_D11G1797,Gh_A05G3330,Gh_A10G1127,Gh_A02G0853,Gh_A13G2306,Gh_D07G0502,Gh_A08G2132,Gh_D10G1485,Gh_A09G2289,Gh_D02G1569,Gh_D10G2262,Gh_…
GO:0001882	nucleoside binding	molecular_function	0.0041556	0.25418	74	351	7619	48611	Gh_D06G0081,Gh_D10G2262,Gh_D10G1485,Gh_D07G0502,Gh_A08G2132,Gh_A13G2306,Gh_D02G1569,Gh_A09G2289,Gh_A10G1127,Gh_A05G3330,Gh_D11G1797,Gh_A12G0436,Gh_A02G0853,Gh_A06G0783,Gh_D02G1026,Gh_D12G1753,Gh_D12G1659,Gh_D13G1983,Gh_D02G1140,Gh_A03G0786,Gh_A13G0455,Gh_A06G0430,Gh_A05G3412,Gh_A12G1073,Gh_D12G1543,Gh_D11G0709,Gh_D13G1991,Gh_D03G0445,Gh_A10G2072,Gh_D01G0898,Gh_D06G2197,Gh_D12G0062,Gh_A09G1177,Gh_…
GO:0090304	nucleic acid metabolic process	biological_process	0.004418	0.26115	98	351	10644	48611	Gh_A01G0073,Gh_D04G0694,Gh_A03G0338,Gh_A09G1177,Gh_A10G2021,Gh_D12G0062,Gh_A08G2548,Gh_A11G2680,Gh_A13G1455,Gh_A11G1852,Gh_D10G2303,Gh_D08G0759,Gh_A06G1633,Gh_A10G1919,Gh_A09G1320,Gh_A08G1995,Gh_D11G0471,Gh_D04G0172,Gh_A03G1496,Gh_D02G1676,Gh_D10G2619,Gh_D03G0121,Gh_D03G0135,Gh_A05G3033,Gh_A08G1954,Gh_D09G1748,Gh_D05G1911,Gh_A05G3517,Gh_D05G0127,Gh_D02G0069,Gh_D03G1234,Gh_D10G0643,Gh_D02G0743,Gh_…
GO:0050794	regulation of cellular process	biological_process	0.0044773	0.26115	82	351	8633	48611	Gh_D04G1173,Gh_D01G0409,Gh_A10G1819,Gh_D12G1747,Gh_Sca004981G04,Gh_A01G0316,Gh_A12G2234,Gh_D11G1068,Gh_A13G0479,Gh_D01G0919,Gh_A05G0517,Gh_D10G0643,Gh_A10G0336,Gh_D13G1410,Gh_D02G0743,Gh_D11G2433,Gh_D05G0127,Gh_A05G3517,Gh_A08G1954,Gh_D13G0101,Gh_D07G1260,Gh_A05G3033,Gh_D02G1805,Gh_D11G0471,Gh_A08G1995,Gh_A10G1919,Gh_A09G0594,Gh_D02G1676,Gh_D04G0172,Gh_A03G1496,Gh_A11G1852,Gh_Sca005163G01,Gh_Sca0…
GO:0019538	protein metabolic process	biological_process	0.004495	0.26115	85	351	9009	48611	Gh_A09G1177,Gh_A11G2680,Gh_A03G0338,Gh_D12G2739,Gh_D12G2520,Gh_D05G0929,Gh_A11G1511,Gh_A03G0893,Gh_D09G2481,Gh_A11G1852,Gh_D04G0459,Gh_D09G2149,Gh_A03G1496,Gh_A08G1859,Gh_A09G1320,Gh_A08G1995,Gh_D10G1895,Gh_D05G2756,Gh_D01G0516,Gh_D07G1063,Gh_D06G0092,Gh_A06G1500,Gh_D09G1748,Gh_D02G1815,Gh_D02G0057,Gh_A03G1427,Gh_D08G1786,Gh_A02G1419,Gh_A10G0336,Gh_A01G1533,Gh_A11G1095,Gh_A01G2143,Gh_D01G0919,Gh_…
GO:0008757	S-adenosylmethionine-dependent methyltransferase activity	molecular_function	0.0045397	0.26115	8	351	355	48611	Gh_A01G0316,Gh_A06G0430,Gh_A04G1093,Gh_D11G1797,Gh_A11G1852,Gh_D09G1575,Gh_A12G0371,Gh_D02G0593
GO:0032553	ribonucleotide binding	molecular_function	0.0045964	0.26115	74	351	7650	48611	Gh_D13G1991,Gh_D03G0445,Gh_A10G2072,Gh_D01G0898,Gh_D06G2197,Gh_A12G1073,Gh_A06G0430,Gh_A05G3412,Gh_D11G0709,Gh_D12G1543,Gh_D02G1026,Gh_A06G0783,Gh_D12G1659,Gh_D12G1753,Gh_D02G1140,Gh_A03G0786,Gh_D13G1983,Gh_A13G0455,Gh_D06G0081,Gh_D10G2262,Gh_A09G2289,Gh_D02G1569,Gh_A08G2132,Gh_D07G0502,Gh_A13G2306,Gh_D10G1485,Gh_A02G0853,Gh_A12G0436,Gh_D11G1797,Gh_A10G1127,Gh_A05G3330,Gh_A04G0034,Gh_A12G1650,Gh_…
GO:0019205	nucleobase-containing compound kinase activity	molecular_function	0.0046972	0.26115	4	351	93	48611	Gh_A07G0465,Gh_A05G0092,Gh_D03G0401,Gh_A10G1919
GO:0004553	hydrolase activity, hydrolyzing O-glycosyl compounds	molecular_function	0.0047297	0.26115	19	351	1350	48611	Gh_A11G1852,Gh_Sca005163G01,Gh_A01G1378,Gh_A09G2067,Gh_D02G2284,Gh_D11G3231,Gh_A03G1844,Gh_A05G3538,Gh_D10G1605,Gh_A03G0338,Gh_A11G1030,Gh_D11G1816,Gh_A03G1923,Gh_D03G0401,Gh_A09G0006,Gh_A01G0828,Gh_A04G0109,Gh_A05G3256,Gh_D13G1991
GO:1901360	organic cyclic compound metabolic process	biological_process	0.0047782	0.26115	114	351	12728	48611	Gh_A05G3224,Gh_A05G1831,Gh_D05G2629,Gh_D11G2427,Gh_D01G0898,Gh_A10G2072,Gh_A12G1684,Gh_D09G2200,Gh_D09G1891,Gh_D02G2315,Gh_A05G3267,Gh_A06G1664,Gh_A12G1509,Gh_D10G0665,Gh_A11G0408,Gh_D12G1758,Gh_A06G0709,Gh_D11G3032,Gh_D12G2235,Gh_D01G2280,Gh_A04G1093,Gh_A12G1073,Gh_A06G0430,Gh_D02G1699,Gh_A12G1604,Gh_A12G1614,Gh_D05G1836,Gh_D04G1994,Gh_A09G0965,Gh_A11G2492,Gh_Sca098321G01,Gh_A11G1097,Gh_A12G0234…
GO:0009987	cellular process	biological_process	0.0048956	0.26115	222	351	27408	48611	Gh_A06G0365,Gh_A03G1427,Gh_A05G3517,Gh_A06G1500,Gh_D13G0101,Gh_D09G1748,Gh_D03G1234,Gh_D02G0069,Gh_D10G0643,Gh_D08G1786,Gh_A02G1419,Gh_D11G2433,Gh_D02G0743,Gh_D13G1410,Gh_A01G1533,Gh_D11G1830,Gh_D06G0907,Gh_D12G1399,Gh_A01G0316,Gh_A13G0479,Gh_A01G2143,Gh_D01G0919,Gh_A12G1650,Gh_D01G0409,Gh_A11G2494,Gh_A03G1923,Gh_A01G1798,Gh_D12G1747,Gh_D09G1575,Gh_A12G0371,Gh_D11G1901,Gh_D12G1990,Gh_D04G0694,Gh_…
GO:0005789	endoplasmic reticulum membrane	cellular_component	0.0049523	0.26115	9	351	439	48611	Gh_A11G1852,Gh_A12G1580,Gh_A10G2072,Gh_A01G0316,Gh_D10G2262,Gh_A11G2680,Gh_A04G1093,Gh_D02G1676,Gh_A01G0725
GO:0042175	nuclear outer membrane-endoplasmic reticulum membrane network	cellular_component	0.0049523	0.26115	9	351	439	48611	Gh_A04G1093,Gh_A01G0725,Gh_D02G1676,Gh_A11G2680,Gh_D10G2262,Gh_A01G0316,Gh_A10G2072,Gh_A12G1580,Gh_A11G1852
GO:0005524	ATP binding	molecular_function	0.0049716	0.26115	67	351	6816	48611	Gh_A06G0430,Gh_A05G3412,Gh_A12G1073,Gh_D12G1543,Gh_D11G0709,Gh_D03G0445,Gh_D13G1991,Gh_D06G2197,Gh_D01G0898,Gh_A10G2072,Gh_D10G2262,Gh_D11G1797,Gh_A12G0436,Gh_A10G1127,Gh_A05G3330,Gh_A02G0853,Gh_A08G2132,Gh_D07G0502,Gh_A13G2306,Gh_D10G1485,Gh_A09G2289,Gh_D02G1569,Gh_D12G1659,Gh_D02G1026,Gh_A06G0783,Gh_A13G0455,Gh_D02G1140,Gh_A03G0786,Gh_D13G1983,Gh_A03G1427,Gh_A13G0368,Gh_D09G1748,Gh_A11G1095,Gh_…
GO:0016798	hydrolase activity, acting on glycosyl bonds	molecular_function	0.0052848	0.27438	20	351	1465	48611	Gh_A05G3538,Gh_A11G1030,Gh_A03G0338,Gh_D10G1605,Gh_A11G1852,Gh_Sca005163G01,Gh_A01G1378,Gh_A09G2067,Gh_D02G2284,Gh_D11G3231,Gh_A03G1844,Gh_A04G0109,Gh_A05G3256,Gh_D13G1991,Gh_D11G1816,Gh_D03G0401,Gh_A03G1923,Gh_A09G0006,Gh_D10G0524,Gh_A01G0828
GO:0036094	small molecule binding	molecular_function	0.0054311	0.27873	84	351	8947	48611	Gh_D05G0127,Gh_D09G1748,Gh_D13G0101,Gh_A13G0368,Gh_A03G1427,Gh_A10G0336,Gh_A01G1533,Gh_D13G1410,Gh_D08G1786,Gh_D02G2420,Gh_A02G1419,Gh_D13G1425,Gh_A11G1095,Gh_D04G0746,Gh_A04G0034,Gh_A05G0517,Gh_A12G1650,Gh_A04G0147,Gh_A09G1580,Gh_D12G1399,Gh_A01G0316,Gh_D03G1084,Gh_D11G1830,Gh_A12G2234,Gh_D06G0907,Gh_D09G1575,Gh_D10G1893,Gh_A11G2680,Gh_D12G0062,Gh_A09G1177,Gh_D12G2520,Gh_D05G0929,Gh_A03G0338,Gh_…
GO:0050789	regulation of biological process	biological_process	0.0056438	0.28209	84	351	8960	48611	Gh_D12G2235,Gh_D11G3032,Gh_A06G0709,Gh_D12G1758,Gh_A11G0408,Gh_D02G1699,Gh_A04G1093,Gh_D01G2280,Gh_A08G0612,Gh_D09G2200,Gh_D05G2629,Gh_A10G2072,Gh_A05G1831,Gh_A05G3224,Gh_A12G1509,Gh_A06G1664,Gh_A13G1386,Gh_A05G3267,Gh_D02G2315,Gh_A10G1127,Gh_A05G3330,Gh_A13G2306,Gh_D07G0502,Gh_A11G0261,Gh_A13G0128,Gh_D10G1485,Gh_D10G2262,Gh_D13G0226,Gh_A12G1766,Gh_A12G0234,Gh_A11G1097,Gh_A11G2492,Gh_A09G0965,Gh_…
GO:0006974	cellular response to DNA damage stimulus	biological_process	0.005754	0.28209	18	351	1276	48611	Gh_A11G1852,Gh_A05G3330,Gh_A11G0408,Gh_D10G1485,Gh_D07G0502,Gh_D04G0694,Gh_D10G2262,Gh_A12G1073,Gh_D09G1748,Gh_D03G0135,Gh_D03G0121,Gh_D01G0898,Gh_A04G0147,Gh_D12G1399,Gh_A01G0316,Gh_D11G1830,Gh_A06G1633,Gh_D04G0172
GO:0006468	protein phosphorylation	biological_process	0.0057548	0.28209	36	351	3201	48611	Gh_A06G0783,Gh_A03G1496,Gh_D02G1026,Gh_D12G1659,Gh_D13G1983,Gh_D10G1895,Gh_D02G1140,Gh_D05G2756,Gh_D06G0092,Gh_D01G0516,Gh_D07G1063,Gh_A13G0455,Gh_A11G2680,Gh_D12G2520,Gh_D05G0929,Gh_D02G1569,Gh_A03G0893,Gh_A08G2132,Gh_A02G0853,Gh_D09G2481,Gh_A10G1127,Gh_D13G1991,Gh_D03G0445,Gh_D06G0907,Gh_D10G1893,Gh_D06G2197,Gh_A05G3412,Gh_A06G1500,Gh_A03G1427,Gh_A10G0336,Gh_A01G1533,Gh_D08G1786,Gh_A02G1419,Gh_…
GO:0044432	endoplasmic reticulum part	cellular_component	0.0059574	0.28209	9	351	452	48611	Gh_A11G2680,Gh_A04G1093,Gh_A01G0725,Gh_D02G1676,Gh_D10G2262,Gh_A01G0316,Gh_A10G2072,Gh_A12G1580,Gh_A11G1852
GO:0009755	hormone-mediated signaling pathway	biological_process	0.006002	0.28209	3	351	51	48611	Gh_A11G1852,Gh_A03G1496,Gh_A04G1093
GO:0016776	phosphotransferase activity, phosphate group as acceptor	molecular_function	0.006002	0.28209	3	351	51	48611	Gh_A07G0465,Gh_A05G0092,Gh_A10G1919
GO:0032870	cellular response to hormone stimulus	biological_process	0.006002	0.28209	3	351	51	48611	Gh_A04G1093,Gh_A03G1496,Gh_A11G1852
GO:0071495	cellular response to endogenous stimulus	biological_process	0.006002	0.28209	3	351	51	48611	Gh_A03G1496,Gh_A04G1093,Gh_A11G1852
GO:0031324	negative regulation of cellular metabolic process	biological_process	0.0063566	0.29134	6	351	227	48611	Gh_A11G2680,Gh_D01G0919,Gh_A13G0128,Gh_A13G2306,Gh_D10G1485,Gh_D08G1394
GO:0009512	cytochrome b6f complex	cellular_component	0.0065008	0.29134	4	351	102	48611	Gh_A01G1256,Gh_A12G0436,Gh_A04G1093,Gh_D11G1901
GO:0016999	antibiotic metabolic process	biological_process	0.0065708	0.29134	2	351	17	48611	Gh_D09G2149,Gh_D10G2417
GO:0017000	antibiotic biosynthetic process	biological_process	0.0065708	0.29134	2	351	17	48611	Gh_D10G2417,Gh_D09G2149
GO:0017144	drug metabolic process	biological_process	0.0065708	0.29134	2	351	17	48611	Gh_D10G2417,Gh_D09G2149
GO:0034641	cellular nitrogen compound metabolic process	biological_process	0.0065902	0.29134	124	351	14160	48611	Gh_D01G0409,Gh_A11G2494,Gh_A03G1923,Gh_D13G2389,Gh_D12G2681,Gh_A01G1798,Gh_D09G1575,Gh_D12G1747,Gh_D11G1901,Gh_A10G1819,Gh_D02G0593,Gh_D11G1830,Gh_A12G2234,Gh_A04G0147,Gh_Sca004981G04,Gh_D12G1399,Gh_A01G0316,Gh_A01G2143,Gh_A12G1650,Gh_D01G0919,Gh_A01G0725,Gh_D02G0069,Gh_D03G1234,Gh_D10G0643,Gh_D13G1425,Gh_D07G2317,Gh_D02G0743,Gh_D11G2433,Gh_A05G3517,Gh_D05G1911,Gh_D09G1748,Gh_A08G1954,Gh_D05G0127…
GO:0071310	cellular response to organic substance	biological_process	0.0066806	0.29244	3	351	53	48611	Gh_A03G1496,Gh_A04G1093,Gh_A11G1852
GO:0015074	DNA integration	biological_process	0.0067585	0.29298	18	351	1297	48611	Gh_A11G1852,Gh_A13G1455,Gh_A12G0436,Gh_D07G0502,Gh_D10G2262,Gh_A03G0338,Gh_A04G1093,Gh_A11G2680,Gh_D12G1468,Gh_D01G0409,Gh_A05G3033,Gh_A10G1819,Gh_D11G2427,Gh_A10G2072,Gh_A01G0316,Gh_A04G0147,Gh_A12G1650,Gh_A03G1496
GO:0006950	response to stress	biological_process	0.0069037	0.29503	33	351	2902	48611	Gh_A11G0408,Gh_D01G1458,Gh_D08G0810,Gh_A12G1073,Gh_D01G2280,Gh_D09G1748,Gh_D06G1621,Gh_D01G0898,Gh_D04G0746,Gh_D12G1399,Gh_A08G1529,Gh_A01G0316,Gh_D02G1882,Gh_Sca004981G04,Gh_A04G0147,Gh_D11G1830,Gh_A09G0853,Gh_D07G0502,Gh_D10G1485,Gh_A11G1852,Gh_A07G1309,Gh_A06G0249,Gh_A05G3330,Gh_A11G2680,Gh_A12G1766,Gh_D12G2739,Gh_D10G2262,Gh_D04G0694,Gh_D03G0135,Gh_D03G0121,Gh_D10G1707,Gh_D04G0172,Gh_A06G1633
GO:0006259	DNA metabolic process	biological_process	0.006938	0.29503	43	351	4044	48611	Gh_D04G0694,Gh_D10G2262,Gh_A03G0338,Gh_A11G2680,Gh_A09G1177,Gh_D12G1468,Gh_D12G0062,Gh_A11G1852,Gh_A07G1309,Gh_A12G0436,Gh_A13G1455,Gh_A05G3330,Gh_D07G0502,Gh_D10G1485,Gh_A07G2294,Gh_A06G1633,Gh_D12G2350,Gh_A10G1919,Gh_A03G1496,Gh_D04G0172,Gh_D10G2619,Gh_A05G3033,Gh_D03G0135,Gh_D03G0121,Gh_A12G1604,Gh_A12G1073,Gh_A04G1093,Gh_D09G1748,Gh_A11G0408,Gh_D02G0743,Gh_D12G1399,Gh_A01G0316,Gh_A04G0147,Gh_…
GO:1901363	heterocyclic compound binding	molecular_function	0.007113	0.29929	150	351	17645	48611	Gh_A05G3267,Gh_D13G1991,Gh_A12G1509,Gh_A04G0398,Gh_A10G2072,Gh_A05G3224,Gh_D06G2197,Gh_D09G2200,Gh_A06G0430,Gh_A05G3412,Gh_A04G1093,Gh_A12G1073,Gh_D12G1543,Gh_D11G0709,Gh_D03G1596,Gh_A06G0783,Gh_D02G1026,Gh_D12G1753,Gh_A07G2294,Gh_D13G1983,Gh_D02G1140,Gh_A11G2492,Gh_Sca098321G01,Gh_A08G2132,Gh_A13G0128,Gh_A11G0261,Gh_D02G1569,Gh_D11G0563,Gh_A09G2289,Gh_A10G1127,Gh_D11G1797,Gh_D03G0537,Gh_A05G0517…
GO:0097159	organic cyclic compound binding	molecular_function	0.0071776	0.29929	150	351	17649	48611	Gh_A03G1352,Gh_D03G0445,Gh_D10G0665,Gh_A08G0612,Gh_D09G1891,Gh_D12G2617,Gh_D01G0898,Gh_D11G2427,Gh_D12G1758,Gh_D07G1240,Gh_D12G1659,Gh_D12G2350,Gh_A08G2544,Gh_D01G0380,Gh_A06G0302,Gh_A12G0234,Gh_A13G0455,Gh_A12G1614,Gh_A03G0786,Gh_D10G2262,Gh_D06G0081,Gh_D12G1468,Gh_A06G0249,Gh_A07G1309,Gh_D10G1401,Gh_A02G0853,Gh_A05G3330,Gh_D12G2194,Gh_A12G0436,Gh_D06G0087,Gh_D10G1485,Gh_A13G2306,Gh_D07G0502,Gh_…
GO:0006725	cellular aromatic compound metabolic process	biological_process	0.0072407	0.29929	111	351	12501	48611	Gh_A06G1633,Gh_A11G1003,Gh_A10G1919,Gh_A04G0975,Gh_A09G1320,Gh_A08G1995,Gh_D11G0471,Gh_D04G0172,Gh_A03G1496,Gh_D02G1676,Gh_D10G2619,Gh_D03G0121,Gh_A05G3033,Gh_D03G0135,Gh_A01G0073,Gh_D04G0694,Gh_A03G0338,Gh_A09G1177,Gh_D12G0062,Gh_A10G2021,Gh_A08G2548,Gh_A11G2680,Gh_Sca004717G07,Gh_A13G1455,Gh_A11G1852,Gh_D10G2303,Gh_D08G0759,Gh_D11G1830,Gh_A12G2234,Gh_D12G1399,Gh_A01G0316,Gh_Sca004981G04,Gh_A04G…
GO:0097367	carbohydrate derivative binding	molecular_function	0.0073062	0.29929	74	351	7798	48611	Gh_D03G0445,Gh_D13G1991,Gh_D06G2197,Gh_A10G2072,Gh_D01G0898,Gh_A12G1073,Gh_A05G3412,Gh_A06G0430,Gh_D11G0709,Gh_D12G1543,Gh_D12G1659,Gh_D12G1753,Gh_D02G1026,Gh_A06G0783,Gh_A13G0455,Gh_D02G1140,Gh_A03G0786,Gh_D13G1983,Gh_D10G2262,Gh_D06G0081,Gh_A02G0853,Gh_A12G0436,Gh_D11G1797,Gh_A10G1127,Gh_A05G3330,Gh_A09G2289,Gh_D02G1569,Gh_A08G2132,Gh_D07G0502,Gh_A13G2306,Gh_D10G1485,Gh_A01G0316,Gh_D12G1399,Gh_…
GO:0008289	lipid binding	molecular_function	0.0073867	0.29983	8	351	386	48611	Gh_D10G1895,Gh_D11G0563,Gh_A13G0296,Gh_D12G2617,Gh_A09G1320,Gh_D10G2262,Gh_A11G0485,Gh_A11G2680
GO:0035639	purine ribonucleoside triphosphate binding	molecular_function	0.0078143	0.30723	71	351	7448	48611	Gh_A12G1073,Gh_A05G3412,Gh_A06G0430,Gh_D11G0709,Gh_D12G1543,Gh_D13G1991,Gh_D03G0445,Gh_A10G2072,Gh_D01G0898,Gh_D06G2197,Gh_D10G2262,Gh_A09G2289,Gh_D02G1569,Gh_A13G2306,Gh_D07G0502,Gh_A08G2132,Gh_D10G1485,Gh_A02G0853,Gh_A12G0436,Gh_D11G1797,Gh_A10G1127,Gh_A05G3330,Gh_D02G1026,Gh_A06G0783,Gh_D12G1659,Gh_D02G1140,Gh_A03G0786,Gh_D13G1983,Gh_A13G0455,Gh_D13G0101,Gh_D09G1748,Gh_A13G0368,Gh_A03G1427,Gh_…
GO:0010558	negative regulation of macromolecule biosynthetic process	biological_process	0.0078582	0.30723	5	351	169	48611	Gh_A11G2680,Gh_D01G0919,Gh_A13G0128,Gh_D10G1485,Gh_D08G1394
GO:0031327	negative regulation of cellular biosynthetic process	biological_process	0.0078582	0.30723	5	351	169	48611	Gh_A11G2680,Gh_D01G0919,Gh_A13G0128,Gh_D10G1485,Gh_D08G1394
GO:2000113	negative regulation of cellular macromolecule biosynthetic process	biological_process	0.0078582	0.30723	5	351	169	48611	Gh_D08G1394,Gh_D10G1485,Gh_A13G0128,Gh_D01G0919,Gh_A11G2680
GO:0009966	regulation of signal transduction	biological_process	0.007936	0.30723	6	351	238	48611	Gh_A10G1127,Gh_D11G1068,Gh_A10G1819,Gh_A11G2680,Gh_A09G0594,Gh_A03G1496
GO:0008610	lipid biosynthetic process	biological_process	0.0079818	0.30723	19	351	1421	48611	Gh_Sca004981G04,Gh_D12G1659,Gh_A12G1044,Gh_D13G1983,Gh_D05G2629,Gh_D09G1575,Gh_D10G0907,Gh_D05G1836,Gh_D10G2262,Gh_D04G0694,Gh_D05G3816,Gh_A04G1093,Gh_A10G1127,Gh_A05G3413,Gh_A11G1852,Gh_D08G1786,Gh_A09G0916,Gh_A10G0336,Gh_D08G0759
GO:0044271	cellular nitrogen compound biosynthetic process	biological_process	0.0080885	0.30867	89	351	9718	48611	Gh_D01G2280,Gh_A04G1093,Gh_D02G1699,Gh_A11G0408,Gh_D12G1758,Gh_D11G3032,Gh_A06G0709,Gh_D12G2235,Gh_D02G2315,Gh_A05G3267,Gh_A06G1664,Gh_A12G1509,Gh_D10G0665,Gh_A05G3224,Gh_A05G1831,Gh_D01G0898,Gh_A10G2072,Gh_D09G2200,Gh_D11G1612,Gh_D09G1818,Gh_A03G0725,Gh_A05G3811,Gh_A12G1766,Gh_A01G2139,Gh_D13G0226,Gh_D10G2262,Gh_D10G1485,Gh_A11G0261,Gh_A13G0128,Gh_D07G1596,Gh_D12G2194,Gh_A05G3330,Gh_A12G0436,Gh_…
GO:0009890	negative regulation of biosynthetic process	biological_process	0.0082444	0.31196	5	351	171	48611	Gh_A11G2680,Gh_D08G1394,Gh_D10G1485,Gh_A13G0128,Gh_D01G0919
GO:0010646	regulation of cell communication	biological_process	0.0085747	0.32173	6	351	242	48611	Gh_A10G1127,Gh_D11G1068,Gh_A10G1819,Gh_A11G2680,Gh_A09G0594,Gh_A03G1496
GO:0012505	endomembrane system	cellular_component	0.0087853	0.32689	20	351	1538	48611	Gh_A03G1496,Gh_D02G1676,Gh_A01G0725,Gh_A01G0316,Gh_D11G0471,Gh_A08G1529,Gh_A10G2072,Gh_D05G2629,Gh_D01G0379,Gh_A12G1614,Gh_D07G1260,Gh_A04G1093,Gh_A11G2680,Gh_D10G2262,Gh_A13G0128,Gh_D10G1485,Gh_A12G1580,Gh_D12G2235,Gh_A11G1852,Gh_D13G1425
GO:1901362	organic cyclic compound biosynthetic process	biological_process	0.0090376	0.3288	75	351	7994	48611	Gh_D10G0665,Gh_A12G1509,Gh_A05G3267,Gh_D02G2315,Gh_A06G1664,Gh_D09G2200,Gh_A05G3224,Gh_D01G0898,Gh_D05G2629,Gh_A05G1831,Gh_D02G1699,Gh_A04G1093,Gh_D01G2280,Gh_D12G2235,Gh_A06G0709,Gh_D11G3032,Gh_A11G0408,Gh_D12G1758,Gh_D07G1240,Gh_A11G2902,Gh_D12G2350,Gh_D01G0380,Gh_D08G1394,Gh_Sca098321G01,Gh_A11G2492,Gh_A11G1097,Gh_A12G0234,Gh_D05G1836,Gh_A12G1614,Gh_A09G0965,Gh_D05G3816,Gh_D10G2262,Gh_D13G0226…
GO:0048513	organ development	biological_process	0.00905	0.3288	2	351	20	48611	Gh_A01G0073,Gh_A06G1500
GO:0003678	DNA helicase activity	molecular_function	0.0091015	0.3288	9	351	484	48611	Gh_D03G0121,Gh_D07G0502,Gh_D01G0898,Gh_D04G0172,Gh_A01G0316,Gh_A04G0147,Gh_A06G1633,Gh_D11G1830,Gh_D10G2262
GO:0043167	ion binding	molecular_function	0.0091312	0.3288	132	351	15354	48611	Gh_A05G1584,Gh_A05G0517,Gh_A13G0504,Gh_D03G0537,Gh_A12G2234,Gh_Sca004981G04,Gh_A04G0147,Gh_D05G2907,Gh_A10G1819,Gh_A08G2364,Gh_D10G1893,Gh_D04G1173,Gh_D02G1815,Gh_D02G2420,Gh_A05G0618,Gh_A10G0336,Gh_D13G1425,Gh_A11G1095,Gh_D04G0172,Gh_A03G1496,Gh_A08G1995,Gh_D09G2409,Gh_D05G2756,Gh_A05G3033,Gh_D07G1063,Gh_A11G0485,Gh_A09G1177,Gh_D12G0062,Gh_A11G2680,Gh_D05G0929,Gh_D12G2520,Gh_A03G0893,Gh_D08G0759…
GO:0051172	negative regulation of nitrogen compound metabolic process	biological_process	0.0096995	0.34647	5	351	178	48611	Gh_A11G2680,Gh_A13G0128,Gh_D01G0919,Gh_D10G1485,Gh_D08G1394
GO:0006413	translational initiation	biological_process	0.0099209	0.34726	5	351	179	48611	Gh_D01G0919,Gh_A10G2072,Gh_A05G3224,Gh_D12G2739,Gh_A11G1852
GO:0023051	regulation of signaling	biological_process	0.0099613	0.34726	6	351	250	48611	Gh_A10G1127,Gh_A11G2680,Gh_D11G1068,Gh_A10G1819,Gh_A09G0594,Gh_A03G1496
GO:0009271	phage shock	biological_process	0.010285	0.34726	3	351	62	48611	Gh_A12G1766,Gh_A11G1852,Gh_Sca004981G04
GO:0098586	cellular response to virus	biological_process	0.010285	0.34726	3	351	62	48611	Gh_A12G1766,Gh_Sca004981G04,Gh_A11G1852
GO:0033554	cellular response to stress	biological_process	0.010291	0.34726	18	351	1355	48611	Gh_D04G0694,Gh_D10G2262,Gh_D09G1748,Gh_A12G1073,Gh_A05G3330,Gh_A11G1852,Gh_D10G1485,Gh_D07G0502,Gh_A11G0408,Gh_D11G1830,Gh_A06G1633,Gh_A04G0147,Gh_D12G1399,Gh_A01G0316,Gh_D04G0172,Gh_D01G0898,Gh_D03G0121,Gh_D03G0135
GO:0046483	heterocycle metabolic process	biological_process	0.010312	0.34726	110	351	12515	48611	Gh_A01G0316,Gh_D12G1399,Gh_A04G0147,Gh_Sca004981G04,Gh_D11G1830,Gh_A12G2234,Gh_D01G0919,Gh_A12G1650,Gh_A01G1798,Gh_D13G2389,Gh_D01G0409,Gh_A11G2494,Gh_D02G0593,Gh_A10G1819,Gh_D11G1901,Gh_D12G1747,Gh_D09G1575,Gh_D05G0127,Gh_D09G1748,Gh_A08G1954,Gh_A05G3517,Gh_D05G1911,Gh_D13G1425,Gh_D10G0643,Gh_D02G0069,Gh_D03G1234,Gh_D02G0743,Gh_D11G2433,Gh_D07G2317,Gh_D11G0471,Gh_A06G1633,Gh_A11G1003,Gh_A04G0975…
GO:0043412	macromolecule modification	biological_process	0.010345	0.34726	48	351	4735	48611	Gh_A06G0783,Gh_A03G1496,Gh_D02G1026,Gh_D12G1659,Gh_A02G0044,Gh_D13G1983,Gh_D10G1895,Gh_D02G1140,Gh_D05G2756,Gh_D06G0092,Gh_D01G0516,Gh_A13G0455,Gh_D07G1063,Gh_A11G1097,Gh_A11G2680,Gh_D11G1714,Gh_D12G2520,Gh_D05G0929,Gh_D02G1569,Gh_A03G0893,Gh_A13G2306,Gh_A08G2132,Gh_A07G1309,Gh_A11G1852,Gh_A02G0853,Gh_D09G2481,Gh_A10G1127,Gh_A12G1580,Gh_A11G3090,Gh_D13G1991,Gh_D03G0445,Gh_D06G0907,Gh_A05G3224,Gh_…
GO:0004518	nuclease activity	molecular_function	0.010363	0.34726	18	351	1356	48611	Gh_D07G0502,Gh_A11G0408,Gh_A07G0303,Gh_A06G0249,Gh_A07G1309,Gh_A11G1852,Gh_A11G2680,Gh_A04G1093,Gh_A03G0338,Gh_D10G2262,Gh_D04G0694,Gh_D07G1786,Gh_A10G2072,Gh_A10G1819,Gh_D10G2619,Gh_A03G1496,Gh_D03G1596,Gh_A01G0316
GO:0055114	oxidation-reduction process	biological_process	0.010493	0.34726	54	351	5459	48611	Gh_A05G3413,Gh_A12G1580,Gh_D12G2194,Gh_A11G1852,Gh_D04G0459,Gh_A11G2426,Gh_D10G1401,Gh_A03G1004,Gh_A09G0916,Gh_D06G0087,Gh_D08G0759,Gh_D04G0694,Gh_D05G3816,Gh_A13G1944,Gh_A07G1317,Gh_D12G1468,Gh_D12G0062,Gh_D06G0081,Gh_A05G3811,Gh_A11G2680,Gh_A06G0302,Gh_A12G2582,Gh_D05G1836,Gh_A05G3033,Gh_A04G0975,Gh_D11G0471,Gh_A10G0789,Gh_D09G2409,Gh_D13G0188,Gh_A11G1755,Gh_A03G1496,Gh_A07G0398,Gh_D07G2317,Gh_…
GO:0032501	multicellular organismal process	biological_process	0.0105	0.34726	16	351	1155	48611	Gh_D10G0456,Gh_D02G1676,Gh_D04G0746,Gh_D03G0121,Gh_A05G3033,Gh_A12G1614,Gh_A01G0073,Gh_A03G1427,Gh_D07G1489,Gh_A03G2031,Gh_A06G1500,Gh_A11G2680,Gh_D12G1543,Gh_A11G1852,Gh_D07G0502,Gh_A12G2648
GO:0016070	RNA metabolic process	biological_process	0.010779	0.35388	72	351	7680	48611	Gh_D12G1747,Gh_D02G0593,Gh_A11G2494,Gh_D01G0409,Gh_D13G2389,Gh_A12G2234,Gh_Sca004981G04,Gh_A01G0316,Gh_D02G0743,Gh_D11G2433,Gh_D02G0069,Gh_D03G1234,Gh_D10G0643,Gh_D05G1911,Gh_A05G3517,Gh_A08G1954,Gh_D05G0127,Gh_A03G1496,Gh_D02G1676,Gh_A09G1320,Gh_A08G1995,Gh_A10G1919,Gh_D11G0471,Gh_D10G2303,Gh_D08G0759,Gh_A13G1455,Gh_A11G1852,Gh_A10G2021,Gh_A08G2548,Gh_A11G2680,Gh_A01G0073,Gh_A05G1831,Gh_D11G2427…
GO:0042060	wound healing	biological_process	0.01108	0.3611	5	351	184	48611	Gh_D04G0746,Gh_D01G2280,Gh_A11G2680,Gh_D03G0121,Gh_D07G0502
GO:0010468	regulation of gene expression	biological_process	0.011225	0.36318	53	351	5358	48611	Gh_A13G0128,Gh_A11G0261,Gh_D10G1485,Gh_A13G1455,Gh_A05G3330,Gh_A11G1852,Gh_A10G2021,Gh_A12G1766,Gh_A11G2680,Gh_A01G0073,Gh_D13G0226,Gh_D10G2262,Gh_A09G0965,Gh_A12G1614,Gh_A11G1097,Gh_A12G0234,Gh_A11G2492,Gh_A03G1496,Gh_D08G1394,Gh_D01G0380,Gh_D02G1676,Gh_D12G2350,Gh_A11G2902,Gh_A10G1919,Gh_D11G0471,Gh_D02G0743,Gh_D12G1758,Gh_D11G2433,Gh_A11G0408,Gh_D12G2235,Gh_A06G0709,Gh_D11G3032,Gh_D10G0643,Gh_…
GO:0034061	DNA polymerase activity	molecular_function	0.011367	0.36515	13	351	870	48611	Gh_A11G1852,Gh_A12G0436,Gh_A10G1819,Gh_A05G3033,Gh_D11G2427,Gh_D02G0743,Gh_D07G0502,Gh_A10G2072,Gh_A04G0147,Gh_A03G0338,Gh_D10G2262,Gh_A11G2680,Gh_A03G1496
GO:0006464	cellular protein modification process	biological_process	0.011973	0.37913	45	351	4418	48611	Gh_A11G1095,Gh_D11G0709,Gh_D12G1543,Gh_D12G2386,Gh_A01G1533,Gh_A10G0336,Gh_A02G1419,Gh_D08G1786,Gh_A03G1427,Gh_D02G0057,Gh_A05G3412,Gh_A06G1500,Gh_D10G1893,Gh_D06G2197,Gh_D03G0445,Gh_D06G0907,Gh_D13G1991,Gh_A11G3090,Gh_A11G1852,Gh_A02G0853,Gh_A12G1580,Gh_A10G1127,Gh_D09G2481,Gh_A03G0893,Gh_D02G1569,Gh_A08G2132,Gh_A13G2306,Gh_D05G0929,Gh_D12G2520,Gh_D11G1714,Gh_A11G2680,Gh_D06G0092,Gh_A11G1097,Gh_…
GO:0036211	protein modification process	biological_process	0.011973	0.37913	45	351	4418	48611	Gh_D11G1714,Gh_A11G2680,Gh_D05G0929,Gh_D12G2520,Gh_A03G0893,Gh_D02G1569,Gh_A08G2132,Gh_A13G2306,Gh_A11G1852,Gh_A02G0853,Gh_A12G1580,Gh_A10G1127,Gh_D09G2481,Gh_D02G1026,Gh_A06G0783,Gh_A03G1496,Gh_D12G1659,Gh_A02G0044,Gh_D02G1140,Gh_D05G2756,Gh_D10G1895,Gh_D13G1983,Gh_D06G0092,Gh_A13G0455,Gh_D07G1063,Gh_A11G1097,Gh_D01G0516,Gh_A06G1500,Gh_A05G3412,Gh_A03G1427,Gh_D02G0057,Gh_A01G1533,Gh_A10G0336,Gh_…
GO:0005634	nucleus	cellular_component	0.012631	0.396	52	351	5272	48611	Gh_D10G1485,Gh_D05G2565,Gh_A11G0261,Gh_D11G0563,Gh_A05G3330,Gh_A12G0436,Gh_A11G1852,Gh_A08G2548,Gh_A11G2680,Gh_D04G0694,Gh_D09G2201,Gh_A01G0073,Gh_A05G2774,Gh_A11G2863,Gh_D01G0379,Gh_A12G1614,Gh_A05G3033,Gh_D09G1778,Gh_A01G1462,Gh_A11G1097,Gh_A11G2492,Gh_A03G1496,Gh_D01G1128,Gh_D02G1676,Gh_A10G1919,Gh_D12G2350,Gh_D11G0471,Gh_D10G2417,Gh_D12G1758,Gh_D02G0743,Gh_A11G0408,Gh_D03G1234,Gh_D10G0643,Gh_…
GO:0005921	gap junction	cellular_component	0.012899	0.396	2	351	24	48611	Gh_A11G1852,Gh_A09G0594
GO:0042287	MHC protein binding	molecular_function	0.012899	0.396	2	351	24	48611	Gh_A11G1852,Gh_A07G1553
GO:0042289	MHC class II protein binding	molecular_function	0.012899	0.396	2	351	24	48611	Gh_A07G1553,Gh_A11G1852
GO:0006260	DNA replication	biological_process	0.012949	0.396	21	351	1705	48611	Gh_D01G0919,Gh_A03G1496,Gh_D12G1399,Gh_A04G0147,Gh_A10G1919,Gh_A05G3033,Gh_A10G1819,Gh_D11G2427,Gh_A10G2072,Gh_D09G2200,Gh_A11G2680,Gh_A09G1177,Gh_D12G0062,Gh_A12G1604,Gh_D10G2262,Gh_A03G0338,Gh_D04G0694,Gh_D07G0502,Gh_D02G0743,Gh_A11G1852,Gh_A12G0436
GO:0060255	regulation of macromolecule metabolic process	biological_process	0.013127	0.39873	54	351	5526	48611	Gh_A12G1614,Gh_A09G0965,Gh_A11G2492,Gh_A11G1097,Gh_A12G0234,Gh_D01G0380,Gh_D02G1676,Gh_A03G1496,Gh_D08G1394,Gh_D11G0471,Gh_A11G2902,Gh_D12G2350,Gh_A10G1919,Gh_A13G2306,Gh_A13G0128,Gh_A11G0261,Gh_D10G1485,Gh_A11G1852,Gh_A13G1455,Gh_A05G3330,Gh_A11G2680,Gh_A10G2021,Gh_A12G1766,Gh_A01G0073,Gh_D13G0226,Gh_D10G2262,Gh_A05G3224,Gh_D12G1747,Gh_A05G1831,Gh_D09G2200,Gh_D01G0409,Gh_A05G3267,Gh_D02G2315,Gh_…
GO:0017111	nucleoside-triphosphatase activity	molecular_function	0.013541	0.40853	31	351	2819	48611	Gh_A11G1852,Gh_D13G1425,Gh_A05G3330,Gh_A12G0436,Gh_Sca004717G07,Gh_D11G1797,Gh_A13G1455,Gh_D13G1410,Gh_A09G2289,Gh_D10G1485,Gh_D02G2420,Gh_D07G0502,Gh_A13G2306,Gh_D10G2262,Gh_A11G2680,Gh_D12G0062,Gh_D13G0101,Gh_A09G1177,Gh_D11G1901,Gh_D03G0121,Gh_D01G0898,Gh_A03G0786,Gh_A10G2072,Gh_A04G0147,Gh_A01G0316,Gh_D12G1399,Gh_D11G1830,Gh_A06G1633,Gh_D04G0172,Gh_A12G1650,Gh_A05G0517
GO:0004672	protein kinase activity	molecular_function	0.013638	0.40869	37	351	3511	48611	Gh_D02G1569,Gh_A03G0893,Gh_A08G2132,Gh_A02G0853,Gh_D09G2481,Gh_A10G1127,Gh_A11G2680,Gh_D12G0062,Gh_D12G2520,Gh_D05G0929,Gh_D13G1983,Gh_D10G1895,Gh_D02G1140,Gh_D05G2756,Gh_D06G0092,Gh_D01G0516,Gh_D07G1063,Gh_A13G0455,Gh_A03G1496,Gh_A06G0783,Gh_D02G1026,Gh_D12G1659,Gh_A10G0336,Gh_A01G1533,Gh_D08G1786,Gh_A02G1419,Gh_D11G0709,Gh_A11G1095,Gh_D12G1543,Gh_A06G1500,Gh_A05G3412,Gh_A03G1427,Gh_D10G1893,Gh_…
GO:0010605	negative regulation of macromolecule metabolic process	biological_process	0.014113	0.4201	6	351	270	48611	Gh_A13G2306,Gh_D01G0919,Gh_A13G0128,Gh_D08G1394,Gh_D10G1485,Gh_A11G2680
GO:0016567	protein ubiquitination	biological_process	0.014585	0.43129	6	351	272	48611	Gh_A13G2306,Gh_A11G3090,Gh_A02G0044,Gh_D11G1714,Gh_D02G0057,Gh_A11G1097
GO:0019438	aromatic compound biosynthetic process	biological_process	0.01478	0.43154	71	351	7666	48611	Gh_A01G0073,Gh_A10G2021,Gh_A11G2680,Gh_A08G2548,Gh_Sca004717G07,Gh_A13G1455,Gh_A11G1852,Gh_D10G2303,Gh_D08G0759,Gh_A10G1919,Gh_A04G0975,Gh_A11G1003,Gh_D11G0471,Gh_D04G0172,Gh_A03G1496,Gh_D02G1676,Gh_A05G3517,Gh_D05G1911,Gh_A08G1954,Gh_D05G0127,Gh_D03G1234,Gh_D10G0643,Gh_D13G1425,Gh_D11G2433,Gh_D02G0743,Gh_A12G2234,Gh_Sca004981G04,Gh_A01G0316,Gh_A11G2494,Gh_D01G0409,Gh_D13G2389,Gh_D12G1747,Gh_D11G…
GO:0005976	polysaccharide metabolic process	biological_process	0.014787	0.43154	13	351	901	48611	Gh_D05G2629,Gh_D13G1983,Gh_D08G1786,Gh_A10G0336,Gh_A05G3413,Gh_A10G1127,Gh_A01G0725,Gh_D12G1820,Gh_D10G1605,Gh_D04G0694,Gh_D10G2262,Gh_A07G1008,Gh_D12G1659
GO:0018580	nitronate monooxygenase activity	molecular_function	0.015047	0.43503	2	351	26	48611	Gh_D10G0665,Gh_A04G0975
GO:0032446	protein modification by small protein conjugation	biological_process	0.015315	0.43503	6	351	275	48611	Gh_A11G3090,Gh_A02G0044,Gh_D11G1714,Gh_A13G2306,Gh_D02G0057,Gh_A11G1097
GO:0070647	protein modification by small protein conjugation or removal	biological_process	0.015315	0.43503	6	351	275	48611	Gh_D11G1714,Gh_A11G3090,Gh_A02G0044,Gh_A13G2306,Gh_A11G1097,Gh_D02G0057
GO:0016021	integral component of membrane	cellular_component	0.01564	0.43503	63	351	6688	48611	Gh_D11G2427,Gh_A10G2072,Gh_D01G0898,Gh_Sca006756G05,Gh_A03G1923,Gh_D11G2040,Gh_A05G0517,Gh_D04G0746,Gh_D11G1068,Gh_A01G0725,Gh_A13G1450,Gh_D06G0907,Gh_A07G1809,Gh_D12G1754,Gh_A01G0316,Gh_D07G2317,Gh_A11G0408,Gh_D13G1410,Gh_D05G3925,Gh_D13G0101,Gh_D09G1748,Gh_D02G1815,Gh_D01G2280,Gh_A04G1093,Gh_D10G1122,Gh_D08G1817,Gh_D03G1132,Gh_D11G3314,Gh_A12G1614,Gh_A05G3033,Gh_A05G3542,Gh_A11G1097,Gh_D12G1705…
GO:0007186	G-protein coupled receptor signaling pathway	biological_process	0.015984	0.43503	9	351	532	48611	Gh_A13G0479,Gh_D12G2354,Gh_A13G1386,Gh_A05G0517,Gh_A01G0417,Gh_D02G1676,Gh_A05G3330,Gh_A11G1852,Gh_A12G0091
GO:0009056	catabolic process	biological_process	0.016088	0.43503	24	351	2070	48611	Gh_A07G1008,Gh_A03G1496,Gh_A01G0931,Gh_A11G1097,Gh_D10G2619,Gh_A01G1798,Gh_D04G1173,Gh_D11G2427,Gh_D10G1605,Gh_A06G0365,Gh_D10G2262,Gh_A13G1944,Gh_D02G1815,Gh_D01G2280,Gh_A12G0436,Gh_Sca004717G07,Gh_D02G2284,Gh_A05G3330,Gh_A11G1852,Gh_D07G0502,Gh_A03G1844,Gh_A11G0261,Gh_A13G2306,Gh_D08G0759
GO:0004482	mRNA (guanine-N7-)-methyltransferase activity	molecular_function	0.016174	0.43503	2	351	27	48611	Gh_A06G0430,Gh_D11G1797
GO:0006959	humoral immune response	biological_process	0.016174	0.43503	2	351	27	48611	Gh_D03G0121,Gh_A11G2680
GO:0033057	multicellular organismal reproductive behavior	biological_process	0.016174	0.43503	2	351	27	48611	Gh_A12G1614,Gh_A12G2648
GO:0042381	hemolymph coagulation	biological_process	0.016174	0.43503	2	351	27	48611	Gh_A11G2680,Gh_D03G0121
GO:0045924	regulation of female receptivity	biological_process	0.016174	0.43503	2	351	27	48611	Gh_A12G2648,Gh_A12G1614
GO:0046008	regulation of female receptivity, post-mating	biological_process	0.016174	0.43503	2	351	27	48611	Gh_A12G2648,Gh_A12G1614
GO:0060180	female mating behavior	biological_process	0.016174	0.43503	2	351	27	48611	Gh_A12G1614,Gh_A12G2648
GO:0048523	negative regulation of cellular process	biological_process	0.016299	0.43578	7	351	360	48611	Gh_D01G0919,Gh_A13G0128,Gh_A13G2306,Gh_D08G1394,Gh_D10G1485,Gh_A11G2680,Gh_A05G3330
GO:0031323	regulation of cellular metabolic process	biological_process	0.016548	0.43981	54	351	5598	48611	Gh_D10G1485,Gh_A13G0128,Gh_A11G0261,Gh_A13G2306,Gh_A11G1852,Gh_A05G3330,Gh_A13G1455,Gh_A11G2680,Gh_A10G2021,Gh_A12G1766,Gh_D13G0226,Gh_D10G2262,Gh_A01G0073,Gh_A12G1614,Gh_A09G0965,Gh_A11G2492,Gh_A12G0234,Gh_A11G1097,Gh_D01G0380,Gh_D02G1676,Gh_A03G1496,Gh_D08G1394,Gh_D11G0471,Gh_A11G2902,Gh_D12G2350,Gh_A10G1919,Gh_A08G1995,Gh_A11G0408,Gh_D12G1758,Gh_D02G0743,Gh_D11G2433,Gh_D10G0643,Gh_A06G0709,Gh_…
GO:0010629	negative regulation of gene expression	biological_process	0.016953	0.4476	5	351	205	48611	Gh_A11G2680,Gh_D08G1394,Gh_D10G1485,Gh_A13G0128,Gh_D01G0919
GO:0016887	ATPase activity	molecular_function	0.017085	0.4476	20	351	1645	48611	Gh_A12G1650,Gh_A05G0517,Gh_D04G0172,Gh_D11G1830,Gh_A03G0786,Gh_D03G0121,Gh_D01G0898,Gh_D11G1901,Gh_D12G0062,Gh_A11G2680,Gh_D10G2262,Gh_A13G2306,Gh_D07G0502,Gh_D10G1485,Gh_D13G1410,Gh_A12G0436,Gh_Sca004717G07,Gh_A13G1455,Gh_A05G3330,Gh_A11G1852
GO:0032774	RNA biosynthetic process	biological_process	0.017664	0.4476	59	351	6234	48611	Gh_A12G1614,Gh_A09G0965,Gh_Sca098321G01,Gh_A11G2492,Gh_A11G1097,Gh_A12G0234,Gh_D01G0380,Gh_D02G1676,Gh_D08G1394,Gh_A03G1496,Gh_D11G0471,Gh_D07G1240,Gh_D12G2350,Gh_A10G1919,Gh_A11G2902,Gh_A13G0128,Gh_A11G0261,Gh_D10G1485,Gh_D10G2303,Gh_A11G1852,Gh_A13G1455,Gh_A12G0436,Gh_A05G3330,Gh_A11G2680,Gh_A08G2548,Gh_A10G2021,Gh_A12G1766,Gh_A01G0073,Gh_D13G0226,Gh_D10G2262,Gh_D12G1747,Gh_A05G1831,Gh_D09G2200…
GO:0065008	regulation of biological quality	biological_process	0.017676	0.4476	17	351	1332	48611	Gh_D03G0121,Gh_D02G1805,Gh_A12G1614,Gh_D07G1260,Gh_D04G0746,Gh_A06G1633,Gh_A01G1946,Gh_A01G0316,Gh_D07G0502,Gh_A12G2648,Gh_A11G1511,Gh_A11G1852,Gh_A12G1766,Gh_A06G1500,Gh_A04G1093,Gh_A11G2680,Gh_D10G2262
GO:0045892	negative regulation of transcription, DNA-templated	biological_process	0.017682	0.4476	4	351	137	48611	Gh_A11G2680,Gh_D08G1394,Gh_D10G1485,Gh_A13G0128
GO:0051253	negative regulation of RNA metabolic process	biological_process	0.017682	0.4476	4	351	137	48611	Gh_A13G0128,Gh_D10G1485,Gh_D08G1394,Gh_A11G2680
GO:1902679	negative regulation of RNA biosynthetic process	biological_process	0.017682	0.4476	4	351	137	48611	Gh_D10G1485,Gh_D08G1394,Gh_A13G0128,Gh_A11G2680
GO:1903507	negative regulation of nucleic acid-templated transcription	biological_process	0.017682	0.4476	4	351	137	48611	Gh_D10G1485,Gh_D08G1394,Gh_A13G0128,Gh_A11G2680
GO:0016462	pyrophosphatase activity	molecular_function	0.017744	0.4476	31	351	2880	48611	Gh_D12G1399,Gh_A01G0316,Gh_A04G0147,Gh_A06G1633,Gh_D11G1830,Gh_A12G1650,Gh_A05G0517,Gh_D04G0172,Gh_D11G1901,Gh_D03G0121,Gh_D01G0898,Gh_A03G0786,Gh_A10G2072,Gh_D10G2262,Gh_A11G2680,Gh_D13G0101,Gh_A09G1177,Gh_D12G0062,Gh_A11G1852,Gh_D13G1425,Gh_Sca004717G07,Gh_D11G1797,Gh_A13G1455,Gh_A12G0436,Gh_A05G3330,Gh_D13G1410,Gh_A09G2289,Gh_D02G2420,Gh_D07G0502,Gh_A13G2306,Gh_D10G1485
GO:0006914	autophagy	biological_process	0.018094	0.45032	8	351	454	48611	Gh_D04G1173,Gh_A05G3330,Gh_A12G0436,Gh_D11G2427,Gh_D07G0502,Gh_A11G0261,Gh_D10G2262,Gh_A03G1496
GO:0009615	response to virus	biological_process	0.018109	0.45032	4	351	138	48611	Gh_A11G2680,Gh_A12G1766,Gh_A11G1852,Gh_Sca004981G04
GO:0044711	single-organism biosynthetic process	biological_process	0.018185	0.45032	40	351	3938	48611	Gh_Sca004981G04,Gh_D10G0456,Gh_A01G0316,Gh_D10G0665,Gh_D04G0746,Gh_A01G0725,Gh_D12G1820,Gh_D03G0537,Gh_A12G1044,Gh_A05G3224,Gh_D11G1901,Gh_D09G1575,Gh_D01G0898,Gh_D05G2629,Gh_A04G1093,Gh_A05G3517,Gh_D13G1425,Gh_A10G0336,Gh_D08G1786,Gh_D12G1659,Gh_A04G0975,Gh_A11G1003,Gh_D04G0172,Gh_A12G1614,Gh_D10G0907,Gh_D05G1836,Gh_D13G1983,Gh_D05G3816,Gh_D04G0694,Gh_D10G2262,Gh_A03G0725,Gh_A11G1852,Gh_D04G0459…
GO:0005525	GTP binding	molecular_function	0.018255	0.45032	17	351	1337	48611	Gh_D10G2262,Gh_A09G1177,Gh_D13G0101,Gh_A05G3330,Gh_A11G1852,Gh_D07G0502,Gh_D02G2420,Gh_D10G1485,Gh_D13G1410,Gh_D11G1830,Gh_A01G0316,Gh_A09G1580,Gh_A05G0517,Gh_D04G0172,Gh_D03G0121,Gh_A03G0786,Gh_A10G2072
GO:0004713	protein tyrosine kinase activity	molecular_function	0.018532	0.45083	2	351	29	48611	Gh_A03G1496,Gh_D10G1895
GO:0019222	regulation of metabolic process	biological_process	0.018758	0.45083	56	351	5884	48611	Gh_D02G1699,Gh_A08G1954,Gh_A05G3517,Gh_A04G1093,Gh_D05G0127,Gh_D01G2280,Gh_D12G2235,Gh_A06G0709,Gh_D11G3032,Gh_D10G0643,Gh_D11G2433,Gh_D12G1758,Gh_D02G0743,Gh_A11G0408,Gh_A12G1509,Gh_A12G2234,Gh_A01G1946,Gh_A01G0316,Gh_Sca004981G04,Gh_A06G1664,Gh_D01G0919,Gh_A05G3267,Gh_D02G2315,Gh_D01G0409,Gh_D04G1173,Gh_D09G2200,Gh_D12G1747,Gh_A05G1831,Gh_A05G3224,Gh_A01G0073,Gh_D10G2262,Gh_D13G0226,Gh_A10G2021…
GO:0006351	transcription, DNA-templated	biological_process	0.018887	0.45083	58	351	6133	48611	Gh_D02G2315,Gh_A05G3267,Gh_A06G1664,Gh_Sca004981G04,Gh_A01G0316,Gh_A12G2234,Gh_A12G1509,Gh_A05G1831,Gh_D12G1747,Gh_D09G2200,Gh_D13G2389,Gh_D01G0409,Gh_A11G2494,Gh_D01G2280,Gh_D05G0127,Gh_A04G1093,Gh_D05G1911,Gh_A05G3517,Gh_A08G1954,Gh_D02G1699,Gh_A11G0408,Gh_D02G0743,Gh_D12G1758,Gh_D11G2433,Gh_D10G0643,Gh_D03G1234,Gh_D11G3032,Gh_A06G0709,Gh_D12G2235,Gh_D01G0380,Gh_D02G1676,Gh_A03G1496,Gh_D08G1394…
GO:0097659	nucleic acid-templated transcription	biological_process	0.018887	0.45083	58	351	6133	48611	Gh_A11G1852,Gh_A05G3330,Gh_A13G1455,Gh_D10G1485,Gh_D10G2303,Gh_A11G0261,Gh_A13G0128,Gh_D13G0226,Gh_D10G2262,Gh_A01G0073,Gh_A08G2548,Gh_A11G2680,Gh_A12G1766,Gh_A10G2021,Gh_A11G2492,Gh_Sca098321G01,Gh_A12G0234,Gh_A11G1097,Gh_A12G1614,Gh_A09G0965,Gh_D07G1240,Gh_D11G0471,Gh_A10G1919,Gh_D12G2350,Gh_A11G2902,Gh_D02G1676,Gh_D01G0380,Gh_A03G1496,Gh_D08G1394,Gh_D10G0643,Gh_D11G3032,Gh_A06G0709,Gh_D03G1234…
GO:0000271	polysaccharide biosynthetic process	biological_process	0.019489	0.45083	11	351	739	48611	Gh_D10G2262,Gh_D04G0694,Gh_D12G1659,Gh_D12G1820,Gh_A01G0725,Gh_A10G1127,Gh_A05G3413,Gh_D08G1786,Gh_D13G1983,Gh_D05G2629,Gh_A10G0336
GO:0032561	guanyl ribonucleotide binding	molecular_function	0.019579	0.45083	17	351	1348	48611	Gh_D13G1410,Gh_D02G2420,Gh_D07G0502,Gh_D10G1485,Gh_A11G1852,Gh_A05G3330,Gh_D13G0101,Gh_A09G1177,Gh_D10G2262,Gh_D03G0121,Gh_A10G2072,Gh_A03G0786,Gh_A05G0517,Gh_D04G0172,Gh_A01G0316,Gh_A09G1580,Gh_D11G1830
GO:0003735	structural constituent of ribosome	molecular_function	0.019589	0.45083	19	351	1561	48611	Gh_A01G2143,Gh_A10G1099,Gh_A08G1859,Gh_A04G0147,Gh_D13G1319,Gh_A01G0316,Gh_A10G2072,Gh_A09G0965,Gh_A03G1923,Gh_D12G0568,Gh_D09G1818,Gh_D11G1612,Gh_D12G2681,Gh_A01G2139,Gh_D09G1748,Gh_A05G3811,Gh_D10G2262,Gh_D07G1596,Gh_A11G1852
GO:0018130	heterocycle biosynthetic process	biological_process	0.019601	0.45083	71	351	7770	48611	Gh_A13G0128,Gh_A11G0261,Gh_D10G1485,Gh_A12G0436,Gh_D12G2194,Gh_A05G3330,Gh_A03G0725,Gh_A12G1766,Gh_D13G0226,Gh_D10G2262,Gh_A12G1614,Gh_A09G0965,Gh_Sca098321G01,Gh_A11G2492,Gh_A12G0234,Gh_A11G1097,Gh_D01G0380,Gh_D08G1394,Gh_D07G1240,Gh_D12G2350,Gh_A11G2902,Gh_A11G0408,Gh_D12G1758,Gh_D12G2235,Gh_D11G3032,Gh_A06G0709,Gh_A04G1093,Gh_D01G2280,Gh_D02G1699,Gh_A05G3224,Gh_D01G0898,Gh_A05G1831,Gh_D09G2200…
GO:0034654	nucleobase-containing compound biosynthetic process	biological_process	0.01969	0.45083	65	351	7018	48611	Gh_A05G1831,Gh_D09G2200,Gh_A06G1664,Gh_D02G2315,Gh_A05G3267,Gh_A12G1509,Gh_D12G1758,Gh_A11G0408,Gh_D11G3032,Gh_A06G0709,Gh_D12G2235,Gh_D01G2280,Gh_A04G1093,Gh_D02G1699,Gh_A09G0965,Gh_A12G1614,Gh_A11G1097,Gh_A12G0234,Gh_A11G2492,Gh_Sca098321G01,Gh_D08G1394,Gh_D01G0380,Gh_D12G2350,Gh_A11G2902,Gh_D07G1240,Gh_D10G1485,Gh_A11G0261,Gh_A13G0128,Gh_D12G2194,Gh_A05G3330,Gh_A12G0436,Gh_A12G1766,Gh_A03G0725…
GO:0005840	ribosome	cellular_component	0.019703	0.45083	19	351	1562	48611	Gh_A10G2072,Gh_A09G0965,Gh_D12G2681,Gh_D11G1612,Gh_A03G1923,Gh_D12G0568,Gh_D09G1818,Gh_A08G1859,Gh_A10G1099,Gh_A01G2143,Gh_D13G1319,Gh_A01G0316,Gh_A04G0147,Gh_A11G1852,Gh_D07G1596,Gh_A05G3811,Gh_A01G2139,Gh_D09G1748,Gh_D10G2262
GO:0006370	7-methylguanosine mRNA capping	biological_process	0.019763	0.45083	2	351	30	48611	Gh_A06G0430,Gh_D11G1797
GO:2000112	regulation of cellular macromolecule biosynthetic process	biological_process	0.01984	0.45083	51	351	5289	48611	Gh_A01G0073,Gh_D13G0226,Gh_D10G2262,Gh_A12G1766,Gh_A10G2021,Gh_A11G2680,Gh_A13G1455,Gh_A05G3330,Gh_A11G1852,Gh_A11G0261,Gh_A13G0128,Gh_D10G1485,Gh_A11G2902,Gh_D12G2350,Gh_A10G1919,Gh_D11G0471,Gh_A03G1496,Gh_D08G1394,Gh_D01G0380,Gh_D02G1676,Gh_A11G1097,Gh_A12G0234,Gh_A11G2492,Gh_A09G0965,Gh_A12G1614,Gh_D02G1699,Gh_A08G1954,Gh_A05G3517,Gh_A04G1093,Gh_D05G0127,Gh_D01G2280,Gh_D12G2235,Gh_D11G3032,Gh_…
GO:0010556	regulation of macromolecule biosynthetic process	biological_process	0.020925	0.45083	51	351	5306	48611	Gh_A08G1954,Gh_A05G3517,Gh_A04G1093,Gh_D05G0127,Gh_D01G2280,Gh_D02G1699,Gh_D12G1758,Gh_D02G0743,Gh_D11G2433,Gh_A11G0408,Gh_D12G2235,Gh_A06G0709,Gh_D11G3032,Gh_D10G0643,Gh_D01G0919,Gh_A06G1664,Gh_A05G3267,Gh_D02G2315,Gh_A12G2234,Gh_A12G1509,Gh_A01G0316,Gh_Sca004981G04,Gh_D12G1747,Gh_A05G1831,Gh_D01G0409,Gh_D09G2200,Gh_A12G1766,Gh_A10G2021,Gh_A11G2680,Gh_A01G0073,Gh_D13G0226,Gh_D10G2262,Gh_A11G0261…
GO:0031326	regulation of cellular biosynthetic process	biological_process	0.020925	0.45083	51	351	5306	48611	Gh_D12G2235,Gh_D11G3032,Gh_A06G0709,Gh_D10G0643,Gh_D11G2433,Gh_D12G1758,Gh_D02G0743,Gh_A11G0408,Gh_D02G1699,Gh_A08G1954,Gh_A05G3517,Gh_A04G1093,Gh_D05G0127,Gh_D01G2280,Gh_D01G0409,Gh_D09G2200,Gh_D12G1747,Gh_A05G1831,Gh_A12G1509,Gh_A12G2234,Gh_A01G0316,Gh_Sca004981G04,Gh_D01G0919,Gh_A06G1664,Gh_A05G3267,Gh_D02G2315,Gh_A13G1455,Gh_A05G3330,Gh_A11G1852,Gh_A11G0261,Gh_A13G0128,Gh_D10G1485,Gh_A01G0073…
GO:0003729	mRNA binding	molecular_function	0.021001	0.45083	3	351	81	48611	Gh_A11G1852,Gh_A13G1455,Gh_A12G1650
GO:0044822	poly(A) RNA binding	molecular_function	0.021001	0.45083	3	351	81	48611	Gh_A11G1852,Gh_A13G1455,Gh_A12G1650
GO:0005247	voltage-gated chloride channel activity	molecular_function	0.021026	0.45083	2	351	31	48611	Gh_D05G0127,Gh_D04G0746
GO:0005253	anion channel activity	molecular_function	0.021026	0.45083	2	351	31	48611	Gh_D05G0127,Gh_D04G0746
GO:0005254	chloride channel activity	molecular_function	0.021026	0.45083	2	351	31	48611	Gh_D04G0746,Gh_D05G0127
GO:0006821	chloride transport	biological_process	0.021026	0.45083	2	351	31	48611	Gh_D04G0746,Gh_D05G0127
GO:0008308	voltage-gated anion channel activity	molecular_function	0.021026	0.45083	2	351	31	48611	Gh_D04G0746,Gh_D05G0127
GO:0015108	chloride transmembrane transporter activity	molecular_function	0.021026	0.45083	2	351	31	48611	Gh_D05G0127,Gh_D04G0746
GO:0016841	ammonia-lyase activity	molecular_function	0.021026	0.45083	2	351	31	48611	Gh_A13G1954,Gh_A08G1995
GO:0045087	innate immune response	biological_process	0.021026	0.45083	2	351	31	48611	Gh_A11G2680,Gh_D03G0121
GO:0048731	system development	biological_process	0.021026	0.45083	2	351	31	48611	Gh_A01G0073,Gh_A06G1500
GO:0050664	oxidoreductase activity, acting on NAD(P)H, oxygen as acceptor	molecular_function	0.021026	0.45083	2	351	31	48611	Gh_A11G2426,Gh_A07G0398
GO:0009889	regulation of biosynthetic process	biological_process	0.021056	0.45083	51	351	5308	48611	Gh_D12G1758,Gh_D11G2433,Gh_D02G0743,Gh_A11G0408,Gh_D12G2235,Gh_D11G3032,Gh_A06G0709,Gh_D10G0643,Gh_A08G1954,Gh_A05G3517,Gh_A04G1093,Gh_D05G0127,Gh_D01G2280,Gh_D02G1699,Gh_D12G1747,Gh_A05G1831,Gh_D01G0409,Gh_D09G2200,Gh_D01G0919,Gh_A06G1664,Gh_A05G3267,Gh_D02G2315,Gh_A12G2234,Gh_A12G1509,Gh_A01G0316,Gh_Sca004981G04,Gh_A11G0261,Gh_A13G0128,Gh_D10G1485,Gh_A13G1455,Gh_A05G3330,Gh_A11G1852,Gh_A10G2021…
GO:0006355	regulation of transcription, DNA-templated	biological_process	0.021203	0.45083	50	351	5188	48611	Gh_D02G1699,Gh_A05G3517,Gh_A08G1954,Gh_D05G0127,Gh_D01G2280,Gh_A04G1093,Gh_D11G3032,Gh_A06G0709,Gh_D12G2235,Gh_D10G0643,Gh_D12G1758,Gh_D11G2433,Gh_D02G0743,Gh_A11G0408,Gh_A12G1509,Gh_A12G2234,Gh_Sca004981G04,Gh_A01G0316,Gh_A06G1664,Gh_D02G2315,Gh_A05G3267,Gh_D01G0409,Gh_D09G2200,Gh_A05G1831,Gh_D12G1747,Gh_D13G0226,Gh_D10G2262,Gh_A01G0073,Gh_A10G2021,Gh_A12G1766,Gh_A11G2680,Gh_A05G3330,Gh_A13G1455…
GO:1903506	regulation of nucleic acid-templated transcription	biological_process	0.021203	0.45083	50	351	5188	48611	Gh_D02G1699,Gh_A04G1093,Gh_D05G0127,Gh_D01G2280,Gh_A08G1954,Gh_A05G3517,Gh_D10G0643,Gh_D12G2235,Gh_A06G0709,Gh_D11G3032,Gh_A11G0408,Gh_D11G2433,Gh_D12G1758,Gh_D02G0743,Gh_A01G0316,Gh_Sca004981G04,Gh_A12G1509,Gh_A12G2234,Gh_A05G3267,Gh_D02G2315,Gh_A06G1664,Gh_D09G2200,Gh_D01G0409,Gh_D12G1747,Gh_A05G1831,Gh_A01G0073,Gh_D13G0226,Gh_D10G2262,Gh_A11G2680,Gh_A10G2021,Gh_A12G1766,Gh_A11G1852,Gh_A13G1455…
GO:0000087	mitotic M phase	biological_process	0.021488	0.45257	1	351	3	48611	Gh_A11G1852
GO:0098763	mitotic cell cycle phase	biological_process	0.021488	0.45257	1	351	3	48611	Gh_A11G1852
GO:0016818	hydrolase activity, acting on acid anhydrides, in phosphorus-containing anhydrides	molecular_function	0.021817	0.45669	32	351	3045	48611	Gh_D10G2262,Gh_A09G1177,Gh_D12G0062,Gh_A11G2680,Gh_Sca004717G07,Gh_A13G1455,Gh_A12G0436,Gh_D11G1797,Gh_A05G3330,Gh_A11G1852,Gh_D07G0502,Gh_A13G2306,Gh_D10G1485,Gh_A09G2289,Gh_A06G1633,Gh_D04G0172,Gh_D03G0121,Gh_A03G0786,Gh_D13G0101,Gh_D13G1425,Gh_D02G2420,Gh_D13G1410,Gh_D11G1830,Gh_A12G2234,Gh_A01G0316,Gh_D12G1399,Gh_A04G0147,Gh_A12G1650,Gh_A05G0517,Gh_D01G0898,Gh_A10G2072,Gh_D11G1901
GO:0019001	guanyl nucleotide binding	molecular_function	0.022038	0.45669	17	351	1367	48611	Gh_A05G3330,Gh_A11G1852,Gh_D07G0502,Gh_D02G2420,Gh_D10G1485,Gh_D13G1410,Gh_D10G2262,Gh_A09G1177,Gh_D13G0101,Gh_D03G0121,Gh_A03G0786,Gh_A10G2072,Gh_D11G1830,Gh_A01G0316,Gh_A09G1580,Gh_A05G0517,Gh_D04G0172
GO:0008174	mRNA methyltransferase activity	molecular_function	0.022322	0.45669	2	351	32	48611	Gh_A06G0430,Gh_D11G1797
GO:0051252	regulation of RNA metabolic process	biological_process	0.022361	0.45669	50	351	5205	48611	Gh_A12G1614,Gh_A09G0965,Gh_A11G2492,Gh_A11G1097,Gh_A12G0234,Gh_D01G0380,Gh_D02G1676,Gh_A03G1496,Gh_D08G1394,Gh_D11G0471,Gh_A11G2902,Gh_D12G2350,Gh_A10G1919,Gh_A11G0261,Gh_A13G0128,Gh_D10G1485,Gh_A11G1852,Gh_A13G1455,Gh_A05G3330,Gh_A11G2680,Gh_A10G2021,Gh_A12G1766,Gh_A01G0073,Gh_D10G2262,Gh_D13G0226,Gh_D12G1747,Gh_A05G1831,Gh_D09G2200,Gh_D01G0409,Gh_A05G3267,Gh_D02G2315,Gh_A06G1664,Gh_A01G0316,Gh_…
GO:2001141	regulation of RNA biosynthetic process	biological_process	0.022361	0.45669	50	351	5205	48611	Gh_D11G0471,Gh_D12G2350,Gh_A10G1919,Gh_A11G2902,Gh_D01G0380,Gh_D02G1676,Gh_A03G1496,Gh_D08G1394,Gh_A11G2492,Gh_A12G0234,Gh_A11G1097,Gh_A12G1614,Gh_A09G0965,Gh_D13G0226,Gh_D10G2262,Gh_A01G0073,Gh_A11G2680,Gh_A12G1766,Gh_A10G2021,Gh_A11G1852,Gh_A05G3330,Gh_A13G1455,Gh_D10G1485,Gh_A13G0128,Gh_A11G0261,Gh_Sca004981G04,Gh_A01G0316,Gh_A12G2234,Gh_A12G1509,Gh_D02G2315,Gh_A05G3267,Gh_A06G1664,Gh_D09G2200…
GO:0051171	regulation of nitrogen compound metabolic process	biological_process	0.0224	0.45669	51	351	5328	48611	Gh_D11G0471,Gh_A10G1919,Gh_D12G2350,Gh_A11G2902,Gh_D01G0380,Gh_D02G1676,Gh_A03G1496,Gh_D08G1394,Gh_A11G2492,Gh_A11G1097,Gh_A12G0234,Gh_A12G1614,Gh_A09G0965,Gh_A01G0073,Gh_D13G0226,Gh_D10G2262,Gh_A11G2680,Gh_A12G1766,Gh_A10G2021,Gh_A11G1852,Gh_A13G1455,Gh_A05G3330,Gh_A13G0128,Gh_A11G0261,Gh_D10G1485,Gh_A01G0316,Gh_Sca004981G04,Gh_A12G2234,Gh_A12G1509,Gh_A05G3267,Gh_D02G2315,Gh_A06G1664,Gh_D01G0919…
GO:0031224	intrinsic component of membrane	cellular_component	0.022985	0.46649	63	351	6824	48611	Gh_D12G2350,Gh_A07G0301,Gh_D11G0471,Gh_A13G1954,Gh_A03G0410,Gh_D13G2512,Gh_D12G2354,Gh_D04G0172,Gh_A12G1732,Gh_A01G0417,Gh_A09G0594,Gh_D02G1676,Gh_A11G1097,Gh_D12G1705,Gh_D03G1132,Gh_D11G3314,Gh_A12G1614,Gh_A05G3033,Gh_A05G3542,Gh_D10G2262,Gh_A07G1317,Gh_D12G2739,Gh_A13G1944,Gh_D07G1489,Gh_D12G0062,Gh_A12G1766,Gh_A11G2680,Gh_A05G3330,Gh_D12G2194,Gh_D10G1401,Gh_D04G1681,Gh_A11G1852,Gh_D04G0459,Gh_…
GO:0008168	methyltransferase activity	molecular_function	0.02327	0.47013	15	351	1165	48611	Gh_D11G1797,Gh_A11G1852,Gh_D04G0459,Gh_A12G0371,Gh_D09G1575,Gh_A05G3224,Gh_D02G0593,Gh_A11G1003,Gh_A01G0316,Gh_A06G0430,Gh_D12G0062,Gh_A11G2680,Gh_D04G0746,Gh_A05G3811,Gh_A04G1093
GO:0005911	cell-cell junction	cellular_component	0.023651	0.47568	2	351	33	48611	Gh_A11G1852,Gh_A09G0594
GO:0007599	hemostasis	biological_process	0.024771	0.48826	4	351	152	48611	Gh_D03G0121,Gh_D07G0502,Gh_A11G2680,Gh_D04G0746
GO:0050817	coagulation	biological_process	0.024771	0.48826	4	351	152	48611	Gh_D03G0121,Gh_D07G0502,Gh_D04G0746,Gh_A11G2680
GO:0050878	regulation of body fluid levels	biological_process	0.024771	0.48826	4	351	152	48611	Gh_A11G2680,Gh_D04G0746,Gh_D07G0502,Gh_D03G0121
GO:0006518	peptide metabolic process	biological_process	0.024806	0.48826	26	351	2384	48611	Gh_D12G0568,Gh_A03G1923,Gh_D09G1818,Gh_D12G2681,Gh_D11G1612,Gh_A10G2072,Gh_A09G0965,Gh_A05G3224,Gh_A08G1995,Gh_A09G1320,Gh_A01G0316,Gh_D13G1319,Gh_A04G0147,Gh_A10G1099,Gh_D01G0919,Gh_A01G2143,Gh_A01G0725,Gh_A08G1859,Gh_A11G1852,Gh_D07G1596,Gh_D10G2262,Gh_D12G2739,Gh_A01G2139,Gh_D09G1748,Gh_A05G3811,Gh_A04G1093
GO:1901135	carbohydrate derivative metabolic process	biological_process	0.02489	0.48826	27	351	2499	48611	Gh_A03G1496,Gh_D12G1659,Gh_A11G1003,Gh_D10G0665,Gh_D11G1901,Gh_A03G1679,Gh_D04G1994,Gh_D09G1575,Gh_A12G1684,Gh_D13G1983,Gh_A01G1798,Gh_A12G0234,Gh_A03G0725,Gh_A13G1944,Gh_D10G2262,Gh_A10G0336,Gh_D08G0759,Gh_A03G1844,Gh_D08G1786,Gh_A11G1852,Gh_D13G1425,Gh_Sca004717G07,Gh_A12G1580,Gh_D02G2284,Gh_A05G3330,Gh_D12G2386,Gh_A10G1127
GO:0051276	chromosome organization	biological_process	0.024932	0.48826	11	351	768	48611	Gh_D11G0471,Gh_A01G0316,Gh_A06G1633,Gh_D10G2262,Gh_A11G1852,Gh_A13G1455,Gh_A11G0408,Gh_D11G2427,Gh_A11G0261,Gh_A13G2306,Gh_D10G2417
GO:0080090	regulation of primary metabolic process	biological_process	0.026278	0.51237	52	351	5504	48611	Gh_D01G0919,Gh_A06G1664,Gh_D02G2315,Gh_A05G3267,Gh_A12G1509,Gh_A12G2234,Gh_Sca004981G04,Gh_A01G0316,Gh_A05G1831,Gh_D12G1747,Gh_D01G0409,Gh_D09G2200,Gh_A05G3517,Gh_A08G1954,Gh_D05G0127,Gh_D01G2280,Gh_A04G1093,Gh_D02G1699,Gh_D11G2433,Gh_D12G1758,Gh_D02G0743,Gh_A11G0408,Gh_D11G3032,Gh_A06G0709,Gh_D12G2235,Gh_D10G0643,Gh_A03G1496,Gh_D08G1394,Gh_D01G0380,Gh_D02G1676,Gh_A11G2902,Gh_D12G2350,Gh_A10G1919…
GO:0005787	signal peptidase complex	cellular_component	0.02681	0.51629	3	351	89	48611	Gh_A10G2072,Gh_A01G0725,Gh_A04G1093
GO:0006465	signal peptide processing	biological_process	0.02681	0.51629	3	351	89	48611	Gh_A10G2072,Gh_A01G0725,Gh_A04G1093
GO:0009378	four-way junction helicase activity	molecular_function	0.026826	0.51629	6	351	313	48611	Gh_D04G0172,Gh_D01G0898,Gh_D07G0502,Gh_D03G0121,Gh_A04G0147,Gh_D11G1830
GO:0009057	macromolecule catabolic process	biological_process	0.027014	0.51767	12	351	878	48611	Gh_D10G2619,Gh_D02G2284,Gh_A11G1097,Gh_A11G1852,Gh_A13G2306,Gh_A03G1844,Gh_A07G1008,Gh_D10G1605,Gh_A13G1944,Gh_D01G2280,Gh_D02G1815,Gh_A01G0931
GO:0044281	small molecule metabolic process	biological_process	0.027245	0.51987	37	351	3693	48611	Gh_D07G2317,Gh_D13G1425,Gh_A04G1093,Gh_A05G3517,Gh_A05G3224,Gh_D11G1901,Gh_D09G1575,Gh_D05G2629,Gh_A12G1684,Gh_A01G1798,Gh_A12G1044,Gh_D03G0537,Gh_Sca004981G04,Gh_D10G0456,Gh_A01G0316,Gh_D10G0665,Gh_D08G0759,Gh_A11G1852,Gh_D12G2194,Gh_A05G3330,Gh_Sca004717G07,Gh_A03G0725,Gh_D06G0081,Gh_A13G1944,Gh_D05G3816,Gh_D10G2262,Gh_D04G0694,Gh_A12G1614,Gh_D05G1836,Gh_D04G1994,Gh_A03G1496,Gh_A01G0669,Gh_A13G…
GO:0019219	regulation of nucleobase-containing compound metabolic process	biological_process	0.028005	0.53209	50	351	5279	48611	Gh_A08G1954,Gh_A05G3517,Gh_A04G1093,Gh_D01G2280,Gh_D05G0127,Gh_D02G1699,Gh_D12G1758,Gh_D11G2433,Gh_D02G0743,Gh_A11G0408,Gh_D12G2235,Gh_D11G3032,Gh_A06G0709,Gh_D10G0643,Gh_A06G1664,Gh_A05G3267,Gh_D02G2315,Gh_A12G1509,Gh_A12G2234,Gh_A01G0316,Gh_Sca004981G04,Gh_D12G1747,Gh_A05G1831,Gh_D01G0409,Gh_D09G2200,Gh_A10G2021,Gh_A12G1766,Gh_A11G2680,Gh_A01G0073,Gh_D10G2262,Gh_D13G0226,Gh_A11G0261,Gh_A13G0128…
GO:0008924	malate dehydrogenase (quinone) activity	molecular_function	0.028548	0.53857	1	351	4	48611	Gh_A04G1093
GO:0010033	response to organic substance	biological_process	0.028587	0.53857	4	351	159	48611	Gh_A03G1496,Gh_D12G2354,Gh_A04G1093,Gh_A11G1852
GO:0016788	hydrolase activity, acting on ester bonds	molecular_function	0.029186	0.54537	32	351	3119	48611	Gh_D03G1596,Gh_D04G0172,Gh_A03G1496,Gh_A01G0669,Gh_D07G1240,Gh_A03G1679,Gh_A03G0786,Gh_D10G2619,Gh_A12G0234,Gh_A11G2680,Gh_A03G0338,Gh_D10G2262,Gh_D04G0694,Gh_D07G1786,Gh_D08G0759,Gh_A13G0128,Gh_D07G0502,Gh_A07G1309,Gh_A06G0249,Gh_A07G0303,Gh_A11G1852,Gh_D11G1068,Gh_A01G0725,Gh_Sca004981G04,Gh_A01G0316,Gh_A10G1819,Gh_A10G2072,Gh_D11G2698,Gh_A04G1093,Gh_D07G0134,Gh_A11G0408,Gh_D12G2386
GO:0022402	cell cycle process	biological_process	0.029192	0.54537	9	351	592	48611	Gh_D09G1748,Gh_D13G0188,Gh_A11G2863,Gh_D07G0502,Gh_D11G2427,Gh_A13G2306,Gh_A05G3330,Gh_D01G0409,Gh_A12G0436
GO:0016853	isomerase activity	molecular_function	0.030014	0.55718	10	351	692	48611	Gh_A13G1455,Gh_D04G0459,Gh_A11G1852,Gh_D02G0593,Gh_D12G1990,Gh_D10G0665,Gh_D10G0456,Gh_D02G1219,Gh_D12G2735,Gh_D12G1820
GO:0000278	mitotic cell cycle	biological_process	0.030213	0.55718	6	351	322	48611	Gh_A12G0436,Gh_D01G0409,Gh_D13G0188,Gh_D07G0502,Gh_D11G2427,Gh_A13G2306
GO:1903047	mitotic cell cycle process	biological_process	0.030213	0.55718	6	351	322	48611	Gh_D13G0188,Gh_A12G0436,Gh_D01G0409,Gh_D07G0502,Gh_D11G2427,Gh_A13G2306
GO:0045934	negative regulation of nucleobase-containing compound metabolic process	biological_process	0.030324	0.55718	4	351	162	48611	Gh_A11G2680,Gh_D08G1394,Gh_D10G1485,Gh_A13G0128
GO:0016773	phosphotransferase activity, alcohol group as acceptor	molecular_function	0.030586	0.55961	40	351	4087	48611	Gh_A03G1427,Gh_A05G3412,Gh_A06G1500,Gh_D11G0709,Gh_A11G1095,Gh_D12G1543,Gh_A10G0336,Gh_A01G1533,Gh_D08G1786,Gh_A02G1419,Gh_D03G0445,Gh_D06G0907,Gh_D13G1991,Gh_A01G1798,Gh_D10G1893,Gh_D06G2197,Gh_D11G2427,Gh_D12G2520,Gh_D05G0929,Gh_A11G2680,Gh_D12G0062,Gh_A02G0853,Gh_A10G1127,Gh_D09G2481,Gh_D02G1569,Gh_A03G0893,Gh_A08G2132,Gh_D12G1659,Gh_A03G1496,Gh_A06G0783,Gh_D02G1026,Gh_D06G0092,Gh_D01G0516,Gh_…
GO:0007264	small GTPase mediated signal transduction	biological_process	0.030778	0.55961	10	351	695	48611	Gh_A01G0316,Gh_D04G0172,Gh_A09G1177,Gh_D13G0101,Gh_A11G1852,Gh_A10G1127,Gh_A10G1819,Gh_D13G1410,Gh_D10G1485,Gh_D07G0502
GO:0070887	cellular response to chemical stimulus	biological_process	0.030832	0.55961	3	351	94	48611	Gh_A04G1093,Gh_A03G1496,Gh_A11G1852
GO:0005635	nuclear envelope	cellular_component	0.03122	0.56437	5	351	241	48611	Gh_A12G1614,Gh_A11G2680,Gh_A03G1496,Gh_D01G0379,Gh_D13G1425
GO:0048193	Golgi vesicle transport	biological_process	0.031367	0.56473	8	351	505	48611	Gh_D02G1676,Gh_A08G1529,Gh_D05G2629,Gh_D11G2427,Gh_D13G1425,Gh_A12G0436,Gh_D12G1705,Gh_A05G3330
GO:0033692	cellular polysaccharide biosynthetic process	biological_process	0.031817	0.57054	10	351	699	48611	Gh_D12G1820,Gh_A01G0725,Gh_D10G2262,Gh_D12G1659,Gh_D13G1983,Gh_D08G1786,Gh_D05G2629,Gh_A10G0336,Gh_A10G1127,Gh_A05G3413
GO:0016817	hydrolase activity, acting on acid anhydrides	molecular_function	0.032973	0.58763	33	351	3270	48611	Gh_A09G2289,Gh_A13G2306,Gh_D07G0502,Gh_D10G1485,Gh_A11G1852,Gh_Sca004717G07,Gh_A12G0436,Gh_D11G1797,Gh_A13G1455,Gh_A05G3330,Gh_A11G2680,Gh_A09G1177,Gh_D12G0062,Gh_D10G2262,Gh_A03G0786,Gh_D03G0121,Gh_D04G0172,Gh_A06G1633,Gh_D13G1410,Gh_D02G2420,Gh_D13G1425,Gh_D13G0101,Gh_D11G1901,Gh_D11G2427,Gh_A10G2072,Gh_D01G0898,Gh_A05G0517,Gh_A12G1650,Gh_D12G1399,Gh_A01G0316,Gh_A04G0147,Gh_D11G1830,Gh_A12G2234
GO:0043229	intracellular organelle	cellular_component	0.033033	0.58763	84	351	9647	48611	Gh_D12G2235,Gh_D10G2417,Gh_D12G1758,Gh_A11G0408,Gh_D08G1817,Gh_D01G2280,Gh_A04G1093,Gh_D09G1891,Gh_D09G1818,Gh_D11G1612,Gh_D11G2427,Gh_A10G2072,Gh_D05G2629,Gh_D12G2617,Gh_A08G1529,Gh_A06G1664,Gh_A05G3267,Gh_A05G3330,Gh_A12G1580,Gh_A12G0436,Gh_D07G1596,Gh_D10G1485,Gh_D07G0502,Gh_A13G0128,Gh_D05G2565,Gh_A11G0261,Gh_D11G0563,Gh_D10G2262,Gh_A05G2774,Gh_A13G1944,Gh_A12G1766,Gh_A01G2139,Gh_A05G3811,Gh_…
GO:0007610	behavior	biological_process	0.033388	0.59158	3	351	97	48611	Gh_A12G1614,Gh_D02G1676,Gh_A12G2648
GO:0006412	translation	biological_process	0.033789	0.59432	24	351	2225	48611	Gh_A05G3811,Gh_D09G1748,Gh_A01G2139,Gh_D12G2739,Gh_D10G2262,Gh_A11G1852,Gh_D07G1596,Gh_A08G1859,Gh_D01G0919,Gh_A10G1099,Gh_A01G2143,Gh_A01G0316,Gh_D13G1319,Gh_A04G0147,Gh_A08G1995,Gh_A09G1320,Gh_A05G3224,Gh_A09G0965,Gh_A10G2072,Gh_D12G2681,Gh_D11G1612,Gh_A03G1923,Gh_D12G0568,Gh_D09G1818
GO:0019882	antigen processing and presentation	biological_process	0.033809	0.59432	2	351	40	48611	Gh_A07G1553,Gh_A11G1852
GO:0001076	transcription factor activity, RNA polymerase II transcription factor binding	molecular_function	0.035149	0.61063	6	351	334	48611	Gh_A01G0316,Gh_A05G3330,Gh_A11G2680,Gh_D01G2280,Gh_A08G1954,Gh_D02G0743
GO:0001104	RNA polymerase II transcription cofactor activity	molecular_function	0.035149	0.61063	6	351	334	48611	Gh_A01G0316,Gh_A05G3330,Gh_D01G2280,Gh_A11G2680,Gh_A08G1954,Gh_D02G0743
GO:0006824	cobalt ion transport	biological_process	0.035377	0.61063	2	351	41	48611	Gh_A12G1614,Gh_A05G3517
GO:0015087	cobalt ion transmembrane transporter activity	molecular_function	0.035377	0.61063	2	351	41	48611	Gh_A12G1614,Gh_A05G3517
GO:0008521	acetyl-CoA transporter activity	molecular_function	0.035557	0.61063	1	351	5	48611	Gh_D02G1815
GO:0051185	coenzyme transporter activity	molecular_function	0.035557	0.61063	1	351	5	48611	Gh_D02G1815
GO:0048583	regulation of response to stimulus	biological_process	0.036019	0.61435	6	351	336	48611	Gh_A03G1496,Gh_A11G2680,Gh_D11G1068,Gh_A09G0594,Gh_A10G1819,Gh_A10G1127
GO:0015078	hydrogen ion transmembrane transporter activity	molecular_function	0.036049	0.61435	16	351	1343	48611	Gh_A01G0725,Gh_D13G2512,Gh_A04G0147,Gh_A13G1954,Gh_D11G0471,Gh_D03G1132,Gh_A11G2680,Gh_A03G0725,Gh_A04G1093,Gh_A07G1317,Gh_D10G2262,Gh_A11G0408,Gh_A11G1852,Gh_A05G3330,Gh_A12G0436,Gh_Sca004717G07
GO:0006357	regulation of transcription from RNA polymerase II promoter	biological_process	0.038254	0.64849	6	351	341	48611	Gh_A08G1954,Gh_D02G0743,Gh_A11G2680,Gh_D01G2280,Gh_A05G3330,Gh_A01G0316
GO:1902494	catalytic complex	cellular_component	0.038343	0.64849	20	351	1798	48611	Gh_D05G2565,Gh_Sca004717G07,Gh_D11G1714,Gh_A04G1093,Gh_A11G2680,Gh_D01G2280,Gh_D02G0057,Gh_A13G1944,Gh_A05G2774,Gh_A10G2072,Gh_D11G2427,Gh_D09G1778,Gh_A02G0044,Gh_A11G1097,Gh_A08G0612,Gh_D13G2389,Gh_D08G1984,Gh_D12G2354,Gh_A01G0725,Gh_A11G3090
GO:0016741	transferase activity, transferring one-carbon groups	molecular_function	0.038928	0.65591	15	351	1248	48611	Gh_A05G3224,Gh_D02G0593,Gh_D09G1575,Gh_A12G0371,Gh_A11G1852,Gh_D04G0459,Gh_D11G1797,Gh_A11G2680,Gh_D04G0746,Gh_A04G1093,Gh_A05G3811,Gh_A06G0430,Gh_D12G0062,Gh_A01G0316,Gh_A11G1003
GO:0030246	carbohydrate binding	molecular_function	0.03971	0.66657	9	351	627	48611	Gh_D04G1228,Gh_D05G2756,Gh_D03G0476,Gh_D06G0092,Gh_D11G0849,Gh_Sca005163G01,Gh_D10G1893,Gh_A11G2680,Gh_A07G1008
GO:1901564	organonitrogen compound metabolic process	biological_process	0.0399	0.66724	53	351	5777	48611	Gh_A04G0147,Gh_A01G0316,Gh_D10G0456,Gh_D10G0665,Gh_A01G0725,Gh_A01G2143,Gh_D01G0919,Gh_D11G1612,Gh_A01G1798,Gh_D12G2681,Gh_A03G1923,Gh_D09G1818,Gh_A05G3224,Gh_D11G1901,Gh_D09G1575,Gh_D05G2629,Gh_A12G1684,Gh_D01G0898,Gh_A10G2072,Gh_A04G1093,Gh_A05G3517,Gh_D09G1748,Gh_D13G1425,Gh_D02G2284,Gh_D13G1319,Gh_A13G1954,Gh_A08G1995,Gh_A09G1320,Gh_A04G0975,Gh_A11G1003,Gh_A08G1859,Gh_D04G0172,Gh_A03G1496,Gh_…
GO:0044710	single-organism metabolic process	biological_process	0.040197	0.66971	101	351	11960	48611	Gh_D10G1401,Gh_A11G2426,Gh_D12G2194,Gh_A05G3330,Gh_A10G1127,Gh_A12G1580,Gh_D10G1485,Gh_D06G0087,Gh_D07G0502,Gh_A13G2306,Gh_A09G0916,Gh_A03G1004,Gh_A07G1317,Gh_A13G1944,Gh_D05G3816,Gh_D10G2262,Gh_A03G0725,Gh_A05G3811,Gh_D06G0081,Gh_D12G1468,Gh_A06G0302,Gh_A12G0234,Gh_A12G1614,Gh_A03G1679,Gh_D10G0907,Gh_D05G1836,Gh_D03G0476,Gh_D13G1983,Gh_D04G1994,Gh_D13G0188,Gh_D12G1659,Gh_A11G1755,Gh_A01G0669,Gh_…
GO:0006576	cellular biogenic amine metabolic process	biological_process	0.041085	0.67556	5	351	260	48611	Gh_A04G1093,Gh_D07G0502,Gh_D04G0172,Gh_A11G1852,Gh_D10G0665
GO:0016485	protein processing	biological_process	0.041322	0.67556	4	351	179	48611	Gh_A04G1093,Gh_A01G0725,Gh_A10G2072,Gh_D12G2350
GO:0051604	protein maturation	biological_process	0.041322	0.67556	4	351	179	48611	Gh_D12G2350,Gh_A10G2072,Gh_A01G0725,Gh_A04G1093
GO:0016787	hydrolase activity	molecular_function	0.041469	0.67556	85	351	9882	48611	Gh_D13G1425,Gh_D13G1410,Gh_D02G2420,Gh_D13G0101,Gh_D07G0134,Gh_D11G1816,Gh_A03G1923,Gh_D11G1901,Gh_A10G1819,Gh_A09G0006,Gh_D12G1399,Gh_A01G0316,Gh_Sca004981G04,Gh_A04G0147,Gh_A07G1809,Gh_D11G1830,Gh_A05G3256,Gh_A12G2234,Gh_A01G0725,Gh_D11G1068,Gh_A05G0517,Gh_A12G1650,Gh_Sca005163G01,Gh_A11G1852,Gh_D04G0459,Gh_Sca004717G07,Gh_A13G1455,Gh_D11G3231,Gh_D08G0759,Gh_A03G1844,Gh_A11G1511,Gh_D07G1786,Gh_…
GO:0043226	organelle	cellular_component	0.041551	0.67556	84	351	9753	48611	Gh_D12G2350,Gh_D13G1319,Gh_D01G1128,Gh_A10G1099,Gh_A01G1462,Gh_A11G1097,Gh_D12G0568,Gh_A11G2492,Gh_A09G0965,Gh_A12G1614,Gh_D10G2262,Gh_A05G2774,Gh_A13G1944,Gh_A12G1766,Gh_A01G2139,Gh_A05G3811,Gh_A05G3330,Gh_A12G0436,Gh_A12G1580,Gh_D07G1596,Gh_D10G1485,Gh_D05G2565,Gh_D07G0502,Gh_A11G0261,Gh_A13G0128,Gh_D11G0563,Gh_A08G1529,Gh_A06G1664,Gh_A05G3267,Gh_D09G1891,Gh_D09G1818,Gh_D11G1612,Gh_D11G2427,Gh_…
GO:0044106	cellular amine metabolic process	biological_process	0.041651	0.67556	5	351	261	48611	Gh_A11G1852,Gh_D10G0665,Gh_A04G1093,Gh_D07G0502,Gh_D04G0172
GO:0016592	mediator complex	cellular_component	0.042011	0.67556	6	351	349	48611	Gh_D01G2280,Gh_A11G2680,Gh_D02G0743,Gh_A08G1954,Gh_A01G0316,Gh_A05G3330
GO:0030529	ribonucleoprotein complex	cellular_component	0.042211	0.67556	21	351	1932	48611	Gh_A04G0147,Gh_D13G1319,Gh_A01G0316,Gh_A08G1859,Gh_A01G2143,Gh_A10G1099,Gh_D11G1612,Gh_D12G2681,Gh_D12G0568,Gh_D09G1818,Gh_A03G1923,Gh_D11G2427,Gh_A09G0965,Gh_A10G2072,Gh_D10G2262,Gh_A11G2680,Gh_A05G3811,Gh_D09G1748,Gh_A01G2139,Gh_D07G1596,Gh_A11G1852
GO:0007517	muscle organ development	biological_process	0.042516	0.67556	1	351	6	48611	Gh_A01G0073
GO:0009881	photoreceptor activity	molecular_function	0.042516	0.67556	1	351	6	48611	Gh_D02G1676
GO:0009882	blue light photoreceptor activity	molecular_function	0.042516	0.67556	1	351	6	48611	Gh_D02G1676
GO:0061061	muscle structure development	biological_process	0.042516	0.67556	1	351	6	48611	Gh_A01G0073
GO:0071949	FAD binding	molecular_function	0.042516	0.67556	1	351	6	48611	Gh_D02G1676
GO:0008276	protein methyltransferase activity	molecular_function	0.043468	0.68821	4	351	182	48611	Gh_A04G1093,Gh_A12G0371,Gh_D09G1575,Gh_A11G1852
GO:0035091	phosphatidylinositol binding	molecular_function	0.04362	0.68821	2	351	46	48611	Gh_D12G2617,Gh_A09G1320
GO:0043043	peptide biosynthetic process	biological_process	0.044356	0.68846	24	351	2289	48611	Gh_A01G2139,Gh_D09G1748,Gh_A05G3811,Gh_D10G2262,Gh_D12G2739,Gh_D07G1596,Gh_A11G1852,Gh_A01G2143,Gh_A10G1099,Gh_D01G0919,Gh_A08G1859,Gh_A08G1995,Gh_A09G1320,Gh_A04G0147,Gh_D13G1319,Gh_A01G0316,Gh_A10G2072,Gh_A09G0965,Gh_A05G3224,Gh_D09G1818,Gh_D12G0568,Gh_A03G1923,Gh_D11G1612,Gh_D12G2681
GO:0009123	nucleoside monophosphate metabolic process	biological_process	0.044399	0.68846	13	351	1055	48611	Gh_D11G1901,Gh_D04G1994,Gh_D09G1575,Gh_A12G1684,Gh_D13G1425,Gh_A11G1852,Gh_A01G1798,Gh_A05G3330,Gh_Sca004717G07,Gh_A03G0725,Gh_A13G1944,Gh_D10G2262,Gh_A11G1003
GO:0006720	isoprenoid metabolic process	biological_process	0.044551	0.68846	5	351	266	48611	Gh_A09G0916,Gh_D09G1575,Gh_D08G0759,Gh_A04G1093,Gh_D10G0907
GO:0008299	isoprenoid biosynthetic process	biological_process	0.044551	0.68846	5	351	266	48611	Gh_A04G1093,Gh_D10G0907,Gh_D08G0759,Gh_A09G0916,Gh_D09G1575
GO:0044707	single-multicellular organism process	biological_process	0.044616	0.68846	11	351	845	48611	Gh_A05G3033,Gh_D07G0502,Gh_D03G0121,Gh_A11G1852,Gh_D02G1676,Gh_A11G2680,Gh_D04G0746,Gh_A06G1500,Gh_D07G1489,Gh_D10G0456,Gh_A01G0073
GO:0009236	cobalamin biosynthetic process	biological_process	0.044673	0.68846	3	351	109	48611	Gh_A05G3224,Gh_A12G1614,Gh_A05G3517
GO:0009452	7-methylguanosine RNA capping	biological_process	0.045347	0.68846	2	351	47	48611	Gh_D11G1797,Gh_A06G0430
GO:0036260	RNA capping	biological_process	0.045347	0.68846	2	351	47	48611	Gh_D11G1797,Gh_A06G0430
GO:0016779	nucleotidyltransferase activity	molecular_function	0.04535	0.68846	21	351	1948	48611	Gh_A10G1819,Gh_A05G3033,Gh_D07G1636,Gh_D11G2427,Gh_A10G2072,Gh_Sca098321G01,Gh_A03G1496,Gh_D11G0831,Gh_A04G0147,Gh_D07G1240,Gh_D10G2303,Gh_D07G0502,Gh_D02G0743,Gh_A11G1852,Gh_A05G3330,Gh_D11G1797,Gh_A12G0436,Gh_A11G2680,Gh_A06G0430,Gh_A03G0338,Gh_D10G2262
GO:0004497	monooxygenase activity	molecular_function	0.045676	0.68846	4	351	185	48611	Gh_D10G0665,Gh_A04G0975,Gh_A04G1093,Gh_D08G0759
GO:0044706	multi-multicellular organism process	biological_process	0.045676	0.68846	4	351	185	48611	Gh_A12G2648,Gh_A12G1614,Gh_D12G1543,Gh_A03G1427
GO:0005244	voltage-gated ion channel activity	molecular_function	0.045689	0.68846	3	351	110	48611	Gh_A11G1852,Gh_D04G0746,Gh_D05G0127
GO:0022832	voltage-gated channel activity	molecular_function	0.045689	0.68846	3	351	110	48611	Gh_A11G1852,Gh_D04G0746,Gh_D05G0127
GO:0048518	positive regulation of biological process	biological_process	0.045988	0.68846	8	351	546	48611	Gh_D05G2629,Gh_D04G1173,Gh_A11G1852,Gh_A11G2680,Gh_D02G1676,Gh_A03G1496,Gh_D12G2350,Gh_D10G2262
GO:0044283	small molecule biosynthetic process	biological_process	0.046625	0.68846	13	351	1063	48611	Gh_Sca004981G04,Gh_D10G0456,Gh_A01G0316,Gh_A04G0975,Gh_D04G0694,Gh_D10G0665,Gh_A05G3517,Gh_A12G1044,Gh_D03G0537,Gh_A12G1614,Gh_D08G0759,Gh_A05G3224,Gh_D05G2629
GO:0006040	amino sugar metabolic process	biological_process	0.046716	0.68846	3	351	111	48611	Gh_A03G1844,Gh_D10G0665,Gh_D02G2284
GO:0005622	intracellular	cellular_component	0.046926	0.68846	111	351	13364	48611	Gh_D02G0057,Gh_D05G0127,Gh_D13G0101,Gh_A08G1954,Gh_D09G1748,Gh_A05G3517,Gh_D13G1425,Gh_D10G0643,Gh_D03G1234,Gh_D02G0069,Gh_D13G1410,Gh_D02G0743,Gh_A01G0316,Gh_A04G0147,Gh_A12G2234,Gh_A01G0725,Gh_A12G1650,Gh_A13G0504,Gh_A01G2143,Gh_D10G1893,Gh_D12G2681,Gh_D13G2389,Gh_D08G1984,Gh_A03G1923,Gh_D01G0409,Gh_Sca006756G05,Gh_D11G1901,Gh_A10G1819,Gh_D12G1747,Gh_A12G0371,Gh_A11G2863,Gh_D12G2520,Gh_A01G0073…
GO:0007617	mating behavior	biological_process	0.047098	0.68846	2	351	48	48611	Gh_A12G1614,Gh_A12G2648
GO:0019098	reproductive behavior	biological_process	0.047098	0.68846	2	351	48	48611	Gh_A12G2648,Gh_A12G1614
GO:0044705	multi-organism reproductive behavior	biological_process	0.047098	0.68846	2	351	48	48611	Gh_A12G2648,Gh_A12G1614
GO:0003854	3-beta-hydroxy-delta5-steroid dehydrogenase activity	molecular_function	0.047182	0.68846	4	351	187	48611	Gh_A05G3413,Gh_D05G3816,Gh_D05G2629,Gh_D05G1836
GO:0016229	steroid dehydrogenase activity	molecular_function	0.047182	0.68846	4	351	187	48611	Gh_D05G1836,Gh_D05G2629,Gh_D05G3816,Gh_A05G3413
GO:0033764	steroid dehydrogenase activity, acting on the CH-OH group of donors, NAD or NADP as acceptor	molecular_function	0.047182	0.68846	4	351	187	48611	Gh_D05G3816,Gh_A05G3413,Gh_D05G1836,Gh_D05G2629
GO:0016679	oxidoreductase activity, acting on diphenols and related substances as donors	molecular_function	0.048716	0.69711	4	351	189	48611	Gh_D11G0471,Gh_A04G0147,Gh_A07G1317,Gh_A11G0408
GO:0030695	GTPase regulator activity	molecular_function	0.048804	0.69711	3	351	113	48611	Gh_A10G1819,Gh_D11G1758,Gh_A10G1127
GO:0030077	plasma membrane light-harvesting complex	cellular_component	0.048874	0.69711	2	351	49	48611	Gh_A12G1766,Gh_A13G1944
GO:0042716	plasma membrane-derived chromatophore	cellular_component	0.048874	0.69711	2	351	49	48611	Gh_A13G1944,Gh_A12G1766
GO:0044445	cytosolic part	cellular_component	0.048874	0.69711	2	351	49	48611	Gh_A13G0128,Gh_Sca004717G07
GO:0008653	lipopolysaccharide metabolic process	biological_process	0.049128	0.69711	6	351	363	48611	Gh_A10G1127,Gh_D10G2262,Gh_D12G1659,Gh_D08G1786,Gh_D13G1983,Gh_A10G0336
GO:0009103	lipopolysaccharide biosynthetic process	biological_process	0.049128	0.69711	6	351	363	48611	Gh_D12G1659,Gh_A10G1127,Gh_D10G2262,Gh_A10G0336,Gh_D13G1983,Gh_D08G1786
GO:0006446	regulation of translational initiation	biological_process	0.049425	0.69711	1	351	7	48611	Gh_D01G0919
GO:0008190	eukaryotic initiation factor 4E binding	molecular_function	0.049425	0.69711	1	351	7	48611	Gh_D01G0919
GO:0045947	negative regulation of translational initiation	biological_process	0.049425	0.69711	1	351	7	48611	Gh_D01G0919
GO:0043566	structure-specific DNA binding	molecular_function	0.049493	0.69711	4	351	190	48611	Gh_A05G3330,Gh_A11G1852,Gh_D10G1485,Gh_D11G3231
GO:0000151	ubiquitin ligase complex	cellular_component	0.050094	0.70267	11	351	862	48611	Gh_D11G1714,Gh_A11G3090,Gh_D01G2280,Gh_A05G2774,Gh_D02G0057,Gh_D09G1778,Gh_A02G0044,Gh_D11G2427,Gh_D05G2565,Gh_D08G1984,Gh_A11G1097
GO:0009892	negative regulation of metabolic process	biological_process	0.050202	0.70267	6	351	365	48611	Gh_A11G2680,Gh_D01G0919,Gh_A13G2306,Gh_A13G0128,Gh_D08G1394,Gh_D10G1485
GO:0009847	spore germination	biological_process	0.050674	0.70357	2	351	50	48611	Gh_A01G0316,Gh_A03G1923
GO:0000723	telomere maintenance	biological_process	0.050938	0.70357	3	351	115	48611	Gh_D10G2262,Gh_A06G1633,Gh_A01G0316
GO:0032200	telomere organization	biological_process	0.050938	0.70357	3	351	115	48611	Gh_A01G0316,Gh_A06G1633,Gh_D10G2262
GO:0060249	anatomical structure homeostasis	biological_process	0.050938	0.70357	3	351	115	48611	Gh_A01G0316,Gh_A06G1633,Gh_D10G2262
GO:0005643	nuclear pore	cellular_component	0.051067	0.70357	4	351	192	48611	Gh_A03G1496,Gh_D01G0379,Gh_A11G2680,Gh_D13G1425
GO:0043603	cellular amide metabolic process	biological_process	0.051212	0.70357	26	351	2560	48611	Gh_A11G1852,Gh_D07G1596,Gh_D12G2739,Gh_D10G2262,Gh_A04G1093,Gh_A05G3811,Gh_A01G2139,Gh_D09G1748,Gh_D12G2681,Gh_D11G1612,Gh_D09G1818,Gh_D12G0568,Gh_A03G1923,Gh_A05G3224,Gh_A10G2072,Gh_A09G0965,Gh_D13G1319,Gh_A01G0316,Gh_A04G0147,Gh_A08G1995,Gh_A09G1320,Gh_A01G0725,Gh_A08G1859,Gh_A10G1099,Gh_D01G0919,Gh_A01G2143
GO:0044431	Golgi apparatus part	cellular_component	0.051839	0.70806	6	351	368	48611	Gh_D13G1425,Gh_D11G0471,Gh_D12G2235,Gh_D02G1676,Gh_D10G1485,Gh_D05G2629
GO:1902589	single-organism organelle organization	biological_process	0.05209	0.70806	12	351	974	48611	Gh_A11G1852,Gh_A12G0436,Gh_A05G3330,Gh_D11G2427,Gh_A13G2306,Gh_A11G2863,Gh_A01G0316,Gh_A04G0147,Gh_A06G1633,Gh_D10G2262,Gh_A11G2680,Gh_A12G1766
GO:0016703	oxidoreductase activity, acting on single donors with incorporation of molecular oxygen, incorporation of one atom of oxygen (internal monooxygenases or internal mixed function oxidases)	molecular_function	0.052497	0.70806	2	351	51	48611	Gh_D10G0665,Gh_A04G0975
GO:0098589	membrane region	cellular_component	0.052497	0.70806	2	351	51	48611	Gh_A04G1093,Gh_D10G1485
GO:0044723	single-organism carbohydrate metabolic process	biological_process	0.052518	0.70806	19	351	1752	48611	Gh_A11G1852,Gh_Sca004717G07,Gh_A12G1580,Gh_A05G3413,Gh_D12G2386,Gh_A10G1127,Gh_A10G0336,Gh_D08G1786,Gh_D04G0694,Gh_D10G2262,Gh_A01G1798,Gh_D03G0476,Gh_A09G0006,Gh_D05G2629,Gh_D13G1983,Gh_D12G1659,Gh_A01G0669,Gh_A01G0725,Gh_D12G1820
GO:0006753	nucleoside phosphate metabolic process	biological_process	0.053013	0.70806	16	351	1415	48611	Gh_D10G2262,Gh_A13G1944,Gh_A03G0725,Gh_Sca004717G07,Gh_D12G2194,Gh_A05G3330,Gh_D13G1425,Gh_A11G1852,Gh_D07G2317,Gh_A11G1003,Gh_A03G1496,Gh_A01G1798,Gh_D09G1575,Gh_D04G1994,Gh_A12G1684,Gh_D11G1901
GO:0009235	cobalamin metabolic process	biological_process	0.053115	0.70806	3	351	117	48611	Gh_A05G3224,Gh_A12G1614,Gh_A05G3517
GO:0006721	terpenoid metabolic process	biological_process	0.053479	0.70806	4	351	195	48611	Gh_D09G1575,Gh_A09G0916,Gh_A04G1093,Gh_D08G0759
GO:0016114	terpenoid biosynthetic process	biological_process	0.053479	0.70806	4	351	195	48611	Gh_A04G1093,Gh_D08G0759,Gh_D09G1575,Gh_A09G0916
GO:0044248	cellular catabolic process	biological_process	0.053707	0.70806	18	351	1643	48611	Gh_D11G2427,Gh_A11G1097,Gh_D10G2619,Gh_D04G1173,Gh_A03G1496,Gh_A01G0931,Gh_A13G2306,Gh_A11G0261,Gh_D07G0502,Gh_A03G1844,Gh_A12G0436,Gh_D02G2284,Gh_A05G3330,Gh_A11G1852,Gh_D01G2280,Gh_A06G0365,Gh_D10G2262,Gh_A13G1944
GO:0001653	peptide receptor activity	molecular_function	0.054344	0.70806	2	351	52	48611	Gh_A13G0479,Gh_D02G1676
GO:0008528	G-protein coupled peptide receptor activity	molecular_function	0.054344	0.70806	2	351	52	48611	Gh_D02G1676,Gh_A13G0479
GO:0008200	ion channel inhibitor activity	molecular_function	0.055953	0.70806	4	351	198	48611	Gh_D11G2427,Gh_A12G1650,Gh_D06G1621,Gh_D13G2361
GO:0016248	channel inhibitor activity	molecular_function	0.055953	0.70806	4	351	198	48611	Gh_D06G1621,Gh_D13G2361,Gh_D11G2427,Gh_A12G1650
GO:0004725	protein tyrosine phosphatase activity	molecular_function	0.056213	0.70806	2	351	53	48611	Gh_A11G1852,Gh_D12G2386
GO:0004800	thyroxine 5'-deiodinase activity	molecular_function	0.056283	0.70806	1	351	8	48611	Gh_D13G1991
GO:0004834	tryptophan synthase activity	molecular_function	0.056283	0.70806	1	351	8	48611	Gh_D10G0665
GO:0020027	hemoglobin metabolic process	biological_process	0.056283	0.70806	1	351	8	48611	Gh_A06G1500
GO:0030097	hemopoiesis	biological_process	0.056283	0.70806	1	351	8	48611	Gh_A06G1500
GO:0030492	hemoglobin binding	molecular_function	0.056283	0.70806	1	351	8	48611	Gh_A06G1500
GO:0030515	snoRNA binding	molecular_function	0.056283	0.70806	1	351	8	48611	Gh_D11G2427
GO:0034450	ubiquitin-ubiquitin ligase activity	molecular_function	0.056283	0.70806	1	351	8	48611	Gh_A11G1097
GO:0048534	hematopoietic or lymphoid organ development	biological_process	0.056283	0.70806	1	351	8	48611	Gh_A06G1500
GO:0051225	spindle assembly	biological_process	0.056283	0.70806	1	351	8	48611	Gh_A11G2863
GO:0061630	ubiquitin protein ligase activity	molecular_function	0.056283	0.70806	1	351	8	48611	Gh_A11G1097
GO:0061659	ubiquitin-like protein ligase activity	molecular_function	0.056283	0.70806	1	351	8	48611	Gh_A11G1097
GO:0072588	box H/ACA RNP complex	cellular_component	0.056283	0.70806	1	351	8	48611	Gh_D11G2427
GO:0030176	integral component of endoplasmic reticulum membrane	cellular_component	0.056465	0.70806	3	351	120	48611	Gh_D10G2262,Gh_D02G1676,Gh_A11G2680
GO:0042221	response to chemical	biological_process	0.057256	0.70806	8	351	572	48611	Gh_A11G1852,Gh_D12G2354,Gh_A03G0410,Gh_A03G1496,Gh_A04G1093,Gh_A08G1529,Gh_A01G0316,Gh_D07G1489
GO:0016998	cell wall macromolecule catabolic process	biological_process	0.057603	0.70806	3	351	121	48611	Gh_A03G1844,Gh_A06G0365,Gh_D02G2284
GO:0006694	steroid biosynthetic process	biological_process	0.057635	0.70806	4	351	200	48611	Gh_D05G3816,Gh_A05G3413,Gh_D05G1836,Gh_D05G2629
GO:0007166	cell surface receptor signaling pathway	biological_process	0.057635	0.70806	4	351	200	48611	Gh_D01G0409,Gh_A11G1852,Gh_A12G1766,Gh_A05G3033
GO:0016791	phosphatase activity	molecular_function	0.05768	0.70806	7	351	474	48611	Gh_A01G0725,Gh_D04G0172,Gh_A03G0786,Gh_D07G1240,Gh_A11G1852,Gh_D10G2262,Gh_D12G2386
GO:0044255	cellular lipid metabolic process	biological_process	0.057954	0.70806	19	351	1774	48611	Gh_A12G1044,Gh_Sca004981G04,Gh_D12G1659,Gh_D03G0476,Gh_D10G0907,Gh_A03G1679,Gh_D09G1575,Gh_D13G1983,Gh_A12G0234,Gh_A04G1093,Gh_D05G3816,Gh_D04G0694,Gh_D10G2262,Gh_D08G0759,Gh_A10G0336,Gh_A09G0916,Gh_D08G1786,Gh_A11G1852,Gh_A10G1127
GO:0046915	transition metal ion transmembrane transporter activity	molecular_function	0.058019	0.70806	5	351	287	48611	Gh_D13G0101,Gh_D04G0172,Gh_A05G3517,Gh_A03G0410,Gh_A12G1614
GO:0005829	cytosol	cellular_component	0.058104	0.70806	2	351	54	48611	Gh_Sca004717G07,Gh_A13G0128
GO:0009085	lysine biosynthetic process	biological_process	0.058104	0.70806	2	351	54	48611	Gh_D10G0456,Gh_D05G2629
GO:0009089	lysine biosynthetic process via diaminopimelate	biological_process	0.058104	0.70806	2	351	54	48611	Gh_D10G0456,Gh_D05G2629
GO:0046451	diaminopimelate metabolic process	biological_process	0.058104	0.70806	2	351	54	48611	Gh_D10G0456,Gh_D05G2629
GO:0005794	Golgi apparatus	cellular_component	0.058119	0.70806	6	351	379	48611	Gh_D12G2235,Gh_D11G0471,Gh_D13G1425,Gh_D05G2629,Gh_D10G1485,Gh_D02G1676
GO:0042626	ATPase activity, coupled to transmembrane movement of substances	molecular_function	0.058199	0.70806	7	351	475	48611	Gh_D11G1901,Gh_A11G2680,Gh_D13G1410,Gh_D04G0172,Gh_D07G0502,Gh_A11G1852,Gh_Sca004717G07
GO:0043492	ATPase activity, coupled to movement of substances	molecular_function	0.058199	0.70806	7	351	475	48611	Gh_A11G1852,Gh_Sca004717G07,Gh_D11G1901,Gh_A11G2680,Gh_D13G1410,Gh_D04G0172,Gh_D07G0502
GO:0031410	cytoplasmic vesicle	cellular_component	0.058713	0.71237	5	351	288	48611	Gh_A08G1529,Gh_A13G1944,Gh_A13G0128,Gh_D10G1485,Gh_A12G1766
GO:0034637	cellular carbohydrate biosynthetic process	biological_process	0.059245	0.71688	10	351	782	48611	Gh_D10G2262,Gh_D12G1659,Gh_D12G1820,Gh_A01G0725,Gh_A05G3413,Gh_A10G1127,Gh_D05G2629,Gh_D13G1983,Gh_D08G1786,Gh_A10G0336
GO:0004568	chitinase activity	molecular_function	0.060017	0.71722	2	351	55	48611	Gh_A03G1844,Gh_D02G2284
GO:0006032	chitin catabolic process	biological_process	0.060017	0.71722	2	351	55	48611	Gh_A03G1844,Gh_D02G2284
GO:0046348	amino sugar catabolic process	biological_process	0.060017	0.71722	2	351	55	48611	Gh_D02G2284,Gh_A03G1844
GO:1901072	glucosamine-containing compound catabolic process	biological_process	0.060017	0.71722	2	351	55	48611	Gh_A03G1844,Gh_D02G2284
GO:0032502	developmental process	biological_process	0.060076	0.71722	11	351	890	48611	Gh_D10G0456,Gh_A01G0316,Gh_D12G1754,Gh_A01G0073,Gh_D02G1676,Gh_D01G2280,Gh_A06G1500,Gh_A11G1852,Gh_A12G0436,Gh_A03G1923,Gh_A05G3033
GO:0016491	oxidoreductase activity	molecular_function	0.060322	0.71823	52	351	5813	48611	Gh_D03G1132,Gh_D02G1805,Gh_A05G3033,Gh_D05G1836,Gh_D12G1705,Gh_A12G2582,Gh_A06G0302,Gh_A03G1496,Gh_D05G2588,Gh_A04G0975,Gh_D09G2409,Gh_D13G0188,Gh_A11G1755,Gh_D11G0471,Gh_A10G0789,Gh_D06G0087,Gh_A03G1004,Gh_A09G0916,Gh_D08G0759,Gh_D12G2194,Gh_A05G3413,Gh_A12G1580,Gh_D10G1401,Gh_A11G2426,Gh_A11G1852,Gh_D06G0081,Gh_D12G0062,Gh_D12G1468,Gh_A05G3811,Gh_A09G1283,Gh_D04G0694,Gh_A07G1317,Gh_D05G3816,Gh_…
GO:0009055	electron carrier activity	molecular_function	0.060865	0.72014	10	351	786	48611	Gh_A01G1256,Gh_A13G1944,Gh_A12G1766,Gh_A04G1093,Gh_A01G0725,Gh_D12G1705,Gh_D11G1279,Gh_D02G1805,Gh_D03G1132,Gh_D12G2617
GO:0005746	mitochondrial respiratory chain	cellular_component	0.061083	0.72014	3	351	124	48611	Gh_A13G1944,Gh_D03G1132,Gh_A04G1093
GO:0045333	cellular respiration	biological_process	0.061729	0.72014	6	351	385	48611	Gh_D04G0459,Gh_A13G1944,Gh_A04G1093,Gh_D04G0746,Gh_A12G1684,Gh_D09G1575
GO:0006305	DNA alkylation	biological_process	0.061952	0.72014	2	351	56	48611	Gh_A11G1852,Gh_A05G3224
GO:0006306	DNA methylation	biological_process	0.061952	0.72014	2	351	56	48611	Gh_A11G1852,Gh_A05G3224
GO:0044728	DNA methylation or demethylation	biological_process	0.061952	0.72014	2	351	56	48611	Gh_A11G1852,Gh_A05G3224
GO:0043231	intracellular membrane-bounded organelle	cellular_component	0.062014	0.72014	66	351	7613	48611	Gh_A01G0316,Gh_A12G2234,Gh_A01G0725,Gh_A12G1650,Gh_D08G1984,Gh_D13G2389,Gh_D10G1893,Gh_D01G0409,Gh_D12G1747,Gh_D13G0101,Gh_A08G1954,Gh_D09G1748,Gh_D10G0643,Gh_D13G1425,Gh_D03G1234,Gh_D02G0743,Gh_D11G0471,Gh_A10G1919,Gh_D02G1676,Gh_A03G1496,Gh_D07G1260,Gh_D09G1778,Gh_A05G3033,Gh_D03G1132,Gh_D01G0379,Gh_A11G2863,Gh_D04G0694,Gh_D09G2201,Gh_A01G0073,Gh_A08G2548,Gh_A11G2680,Gh_A11G1852,Gh_Sca004717G07…
GO:0009150	purine ribonucleotide metabolic process	biological_process	0.062655	0.72014	13	351	1114	48611	Gh_D09G1575,Gh_D04G1994,Gh_A12G1684,Gh_D11G1901,Gh_A05G3330,Gh_Sca004717G07,Gh_D13G1425,Gh_A01G1798,Gh_A11G1852,Gh_A03G1496,Gh_A03G0725,Gh_D10G2262,Gh_A13G1944
GO:0043604	amide biosynthetic process	biological_process	0.062836	0.72014	24	351	2378	48611	Gh_A01G2139,Gh_D09G1748,Gh_A05G3811,Gh_D10G2262,Gh_D12G2739,Gh_D07G1596,Gh_A11G1852,Gh_A01G2143,Gh_D01G0919,Gh_A10G1099,Gh_A08G1859,Gh_A08G1995,Gh_A09G1320,Gh_A04G0147,Gh_D13G1319,Gh_A01G0316,Gh_A09G0965,Gh_A10G2072,Gh_A05G3224,Gh_D09G1818,Gh_D12G0568,Gh_A03G1923,Gh_D11G1612,Gh_D12G2681
GO:0004715	non-membrane spanning protein tyrosine kinase activity	molecular_function	0.063093	0.72014	1	351	9	48611	Gh_D10G1895
GO:0005242	inward rectifier potassium channel activity	molecular_function	0.063093	0.72014	1	351	9	48611	Gh_A11G1852
GO:0007172	signal complex assembly	biological_process	0.063093	0.72014	1	351	9	48611	Gh_A03G1496
GO:0008851	ethanolamine ammonia-lyase activity	molecular_function	0.063093	0.72014	1	351	9	48611	Gh_A13G1954
GO:0015205	nucleobase transmembrane transporter activity	molecular_function	0.063093	0.72014	1	351	9	48611	Gh_D11G2427
GO:0015851	nucleobase transport	biological_process	0.063093	0.72014	1	351	9	48611	Gh_D11G2427
GO:0047200	tetrahydrodipicolinate N-acetyltransferase activity	molecular_function	0.063093	0.72014	1	351	9	48611	Gh_A05G3330
GO:0043227	membrane-bounded organelle	cellular_component	0.063224	0.72014	66	351	7622	48611	Gh_A12G2648,Gh_A11G1852,Gh_Sca004717G07,Gh_A11G2680,Gh_A08G2548,Gh_A11G2863,Gh_A01G0073,Gh_D09G2201,Gh_D04G0694,Gh_A05G3033,Gh_D09G1778,Gh_D01G0379,Gh_D03G1132,Gh_D07G1260,Gh_D02G1676,Gh_A03G1496,Gh_D11G0471,Gh_A10G1919,Gh_D02G0743,Gh_D13G1425,Gh_D10G0643,Gh_D03G1234,Gh_D09G1748,Gh_A08G1954,Gh_D13G0101,Gh_D12G1747,Gh_D10G1893,Gh_D08G1984,Gh_D13G2389,Gh_D01G0409,Gh_A01G0725,Gh_A12G1650,Gh_A01G0316…
GO:0008237	metallopeptidase activity	molecular_function	0.063582	0.72209	6	351	388	48611	Gh_Sca004981G04,Gh_A05G3412,Gh_D01G0898,Gh_A09G1177,Gh_A10G1819,Gh_A01G0725
GO:0009126	purine nucleoside monophosphate metabolic process	biological_process	0.06388	0.72209	12	351	1008	48611	Gh_D11G1901,Gh_D09G1575,Gh_D04G1994,Gh_A12G1684,Gh_D13G1425,Gh_A11G1852,Gh_A01G1798,Gh_Sca004717G07,Gh_A05G3330,Gh_A03G0725,Gh_A13G1944,Gh_D10G2262
GO:0009167	purine ribonucleoside monophosphate metabolic process	biological_process	0.06388	0.72209	12	351	1008	48611	Gh_D11G1901,Gh_D09G1575,Gh_D04G1994,Gh_A12G1684,Gh_A01G1798,Gh_D13G1425,Gh_A11G1852,Gh_A05G3330,Gh_Sca004717G07,Gh_A03G0725,Gh_A13G1944,Gh_D10G2262
GO:0044264	cellular polysaccharide metabolic process	biological_process	0.064614	0.72854	10	351	795	48611	Gh_D12G1820,Gh_A01G0725,Gh_D12G1659,Gh_D10G2262,Gh_A10G0336,Gh_D05G2629,Gh_D13G1983,Gh_D08G1786,Gh_A05G3413,Gh_A10G1127
GO:0008173	RNA methyltransferase activity	molecular_function	0.065539	0.7371	4	351	209	48611	Gh_A06G0430,Gh_D02G0593,Gh_D11G1797,Gh_A01G0316
GO:0007618	mating	biological_process	0.065884	0.73754	2	351	58	48611	Gh_A12G1614,Gh_A12G2648
GO:0031982	vesicle	cellular_component	0.065908	0.73754	5	351	298	48611	Gh_A13G1944,Gh_A08G1529,Gh_D10G1485,Gh_A12G1766,Gh_A13G0128
GO:0003723	RNA binding	molecular_function	0.067656	0.7496	26	351	2637	48611	Gh_A10G2072,Gh_D11G2427,Gh_D03G0121,Gh_A03G0786,Gh_A10G1819,Gh_A05G3224,Gh_D02G0593,Gh_A05G3033,Gh_D09G1891,Gh_A03G1496,Gh_D04G0172,Gh_A12G1650,Gh_D11G1830,Gh_A08G1995,Gh_A04G0147,Gh_D10G2303,Gh_D07G0502,Gh_A09G2289,Gh_A05G3330,Gh_A13G1455,Gh_A12G0436,Gh_A11G1852,Gh_A11G2680,Gh_D10G2262,Gh_A03G0338,Gh_D12G2739
GO:0048037	cofactor binding	molecular_function	0.067658	0.7496	16	351	1465	48611	Gh_D02G1815,Gh_A04G1093,Gh_D05G3816,Gh_D08G0759,Gh_A03G0893,Gh_A11G1852,Gh_D02G0069,Gh_A05G3413,Gh_D02G1676,Gh_A03G1496,Gh_A12G1650,Gh_D10G0665,Gh_D05G1836,Gh_D05G2629,Gh_D09G1575,Gh_A06G0302
GO:0016829	lyase activity	molecular_function	0.067884	0.7496	14	351	1240	48611	Gh_A10G2071,Gh_A11G1852,Gh_A11G1097,Gh_Sca004717G07,Gh_D12G2194,Gh_D10G2303,Gh_A13G1954,Gh_D10G0665,Gh_A08G1995,Gh_D10G1122,Gh_A04G1093,Gh_Sca006756G06,Gh_D02G1629,Gh_D03G0537
GO:0006163	purine nucleotide metabolic process	biological_process	0.067994	0.7496	13	351	1129	48611	Gh_D11G1901,Gh_A12G1684,Gh_D09G1575,Gh_D04G1994,Gh_A01G1798,Gh_D13G1425,Gh_A11G1852,Gh_A05G3330,Gh_Sca004717G07,Gh_A03G0725,Gh_A03G1496,Gh_A13G1944,Gh_D10G2262
GO:0016071	mRNA metabolic process	biological_process	0.068033	0.7496	6	351	395	48611	Gh_D09G1891,Gh_D11G1797,Gh_A13G1944,Gh_A06G0430,Gh_D11G0563,Gh_A11G2680
GO:0005783	endoplasmic reticulum	cellular_component	0.068069	0.7496	10	351	803	48611	Gh_A12G1580,Gh_A11G1852,Gh_D07G1260,Gh_A10G2072,Gh_D10G2262,Gh_A01G0316,Gh_A11G2680,Gh_A01G0725,Gh_A04G1093,Gh_D02G1676
GO:0009719	response to endogenous stimulus	biological_process	0.068329	0.7496	3	351	130	48611	Gh_A11G1852,Gh_A04G1093,Gh_A03G1496
GO:0009725	response to hormone	biological_process	0.068329	0.7496	3	351	130	48611	Gh_A11G1852,Gh_A04G1093,Gh_A03G1496
GO:0006397	mRNA processing	biological_process	0.068918	0.75421	5	351	302	48611	Gh_A06G0430,Gh_D11G0563,Gh_A11G2680,Gh_D11G1797,Gh_D09G1891
GO:0004809	tRNA (guanine-N2-)-methyltransferase activity	molecular_function	0.069854	0.75673	1	351	10	48611	Gh_D02G0593
GO:0031082	BLOC complex	cellular_component	0.069854	0.75673	1	351	10	48611	Gh_A13G0128
GO:0031083	BLOC-1 complex	cellular_component	0.069854	0.75673	1	351	10	48611	Gh_A13G0128
GO:0000287	magnesium ion binding	molecular_function	0.069995	0.75673	6	351	398	48611	Gh_D09G1575,Gh_Sca006756G06,Gh_Sca004717G07,Gh_D13G1425,Gh_A10G2071,Gh_A01G1798
GO:0044703	multi-organism reproductive process	biological_process	0.069995	0.75673	6	351	398	48611	Gh_A12G1614,Gh_A12G2648,Gh_A03G2031,Gh_D12G1543,Gh_A03G1427,Gh_A13G1455
GO:1990234	transferase complex	cellular_component	0.071131	0.76715	15	351	1362	48611	Gh_A01G0725,Gh_D11G1714,Gh_A04G1093,Gh_A11G3090,Gh_D01G2280,Gh_D02G0057,Gh_A05G2774,Gh_D11G2427,Gh_D05G2565,Gh_A10G2072,Gh_D09G1778,Gh_A02G0044,Gh_A11G1097,Gh_D13G2389,Gh_D08G1984
GO:0005198	structural molecule activity	molecular_function	0.071608	0.77044	27	351	2774	48611	Gh_A04G0147,Gh_A01G0316,Gh_D13G1319,Gh_A08G1859,Gh_D01G0380,Gh_A01G2143,Gh_A10G1099,Gh_D11G1612,Gh_D12G2681,Gh_D12G0568,Gh_A03G1923,Gh_D09G1818,Gh_A10G2072,Gh_A09G0965,Gh_D08G1817,Gh_A11G2863,Gh_D07G1489,Gh_D10G2262,Gh_A11G2680,Gh_A05G3811,Gh_A01G2139,Gh_D09G1748,Gh_D07G1596,Gh_A11G1852,Gh_A05G3330,Gh_D10G1485,Gh_D07G0502
GO:0040029	regulation of gene expression, epigenetic	biological_process	0.071933	0.77099	2	351	61	48611	Gh_A05G3224,Gh_A11G1852
GO:0003743	translation initiation factor activity	molecular_function	0.072056	0.77099	4	351	216	48611	Gh_A11G1852,Gh_D12G2739,Gh_A10G2072,Gh_A05G3224
GO:1903509	liposaccharide metabolic process	biological_process	0.072178	0.77099	9	351	706	48611	Gh_A10G0336,Gh_A03G1679,Gh_D13G1983,Gh_D08G1786,Gh_A11G1852,Gh_A12G0234,Gh_A10G1127,Gh_D12G1659,Gh_D10G2262
GO:0009259	ribonucleotide metabolic process	biological_process	0.072476	0.77232	13	351	1141	48611	Gh_D13G1425,Gh_A01G1798,Gh_A11G1852,Gh_A05G3330,Gh_Sca004717G07,Gh_D11G1901,Gh_D09G1575,Gh_D04G1994,Gh_A12G1684,Gh_A13G1944,Gh_D10G2262,Gh_A03G0725,Gh_A03G1496
GO:0006606	protein import into nucleus	biological_process	0.073366	0.77259	3	351	134	48611	Gh_D01G0379,Gh_A03G1496,Gh_D13G1425
GO:0034504	protein localization to nucleus	biological_process	0.073366	0.77259	3	351	134	48611	Gh_A03G1496,Gh_D01G0379,Gh_D13G1425
GO:0044744	protein targeting to nucleus	biological_process	0.073366	0.77259	3	351	134	48611	Gh_D13G1425,Gh_D01G0379,Gh_A03G1496
GO:0051170	nuclear import	biological_process	0.073366	0.77259	3	351	134	48611	Gh_D13G1425,Gh_A03G1496,Gh_D01G0379
GO:1902593	single-organism nuclear import	biological_process	0.073366	0.77259	3	351	134	48611	Gh_D13G1425,Gh_D01G0379,Gh_A03G1496
GO:0000041	transition metal ion transport	biological_process	0.073573	0.77295	5	351	308	48611	Gh_A12G1614,Gh_D13G0101,Gh_A05G3517,Gh_D04G0172,Gh_A03G0410
GO:0050662	coenzyme binding	molecular_function	0.074398	0.77696	13	351	1146	48611	Gh_D02G1676,Gh_A04G1093,Gh_A12G1650,Gh_A03G1496,Gh_D05G3816,Gh_D10G0665,Gh_D05G1836,Gh_A03G0893,Gh_D08G0759,Gh_D05G2629,Gh_D09G1575,Gh_A06G0302,Gh_A05G3413
GO:0009161	ribonucleoside monophosphate metabolic process	biological_process	0.074408	0.77696	12	351	1035	48611	Gh_A13G1944,Gh_D10G2262,Gh_A03G0725,Gh_D13G1425,Gh_A01G1798,Gh_A11G1852,Gh_Sca004717G07,Gh_A05G3330,Gh_D11G1901,Gh_A12G1684,Gh_D09G1575,Gh_D04G1994
GO:0031227	intrinsic component of endoplasmic reticulum membrane	cellular_component	0.074651	0.77696	3	351	135	48611	Gh_D10G2262,Gh_A11G2680,Gh_D02G1676
GO:0070469	respiratory chain	cellular_component	0.074651	0.77696	3	351	135	48611	Gh_A13G1944,Gh_D03G1132,Gh_A04G1093
GO:0006470	protein dephosphorylation	biological_process	0.076061	0.78051	2	351	63	48611	Gh_D12G2386,Gh_A11G1852
GO:0016846	carbon-sulfur lyase activity	molecular_function	0.076061	0.78051	2	351	63	48611	Gh_A11G1097,Gh_D02G1629
GO:0045156	electron transporter, transferring electrons within the cyclic electron transport pathway of photosynthesis activity	molecular_function	0.076061	0.78051	2	351	63	48611	Gh_A12G1766,Gh_A13G1944
GO:0042623	ATPase activity, coupled	molecular_function	0.076479	0.78051	11	351	930	48611	Gh_A13G1455,Gh_Sca004717G07,Gh_A11G1852,Gh_D07G0502,Gh_A13G2306,Gh_D11G1901,Gh_D13G1410,Gh_D12G0062,Gh_D04G0172,Gh_A12G1650,Gh_A11G2680
GO:0000796	condensin complex	cellular_component	0.076565	0.78051	1	351	11	48611	Gh_D11G2427
GO:0007076	mitotic chromosome condensation	biological_process	0.076565	0.78051	1	351	11	48611	Gh_D11G2427
GO:0008241	peptidyl-dipeptidase activity	molecular_function	0.076565	0.78051	1	351	11	48611	Gh_A05G3412
GO:0008963	phospho-N-acetylmuramoyl-pentapeptide-transferase activity	molecular_function	0.076565	0.78051	1	351	11	48611	Gh_A11G1852
GO:0009186	deoxyribonucleoside diphosphate metabolic process	biological_process	0.076565	0.78051	1	351	11	48611	Gh_D07G2317
GO:0004930	G-protein coupled receptor activity	molecular_function	0.076905	0.78066	4	351	221	48611	Gh_D02G1676,Gh_A01G0417,Gh_A13G0479,Gh_D07G1489
GO:0048522	positive regulation of cellular process	biological_process	0.076972	0.78066	7	351	508	48611	Gh_D04G1173,Gh_A11G1852,Gh_D10G2262,Gh_A11G2680,Gh_D02G1676,Gh_A03G1496,Gh_D05G2629
GO:0007275	multicellular organismal development	biological_process	0.077465	0.78066	6	351	409	48611	Gh_A11G1852,Gh_D10G0456,Gh_A01G0073,Gh_D02G1676,Gh_A05G3033,Gh_A06G1500
GO:0030234	enzyme regulator activity	molecular_function	0.07773	0.78066	12	351	1043	48611	Gh_A03G0338,Gh_D12G1399,Gh_D04G0198,Gh_D07G1240,Gh_D07G0134,Gh_A10G1127,Gh_A11G1852,Gh_A08G0612,Gh_A09G0853,Gh_D13G2361,Gh_A10G1819,Gh_D11G1758
GO:0098772	molecular function regulator	molecular_function	0.077838	0.78066	15	351	1381	48611	Gh_A03G0338,Gh_D12G1399,Gh_D04G0198,Gh_D07G1240,Gh_A12G1650,Gh_D07G0134,Gh_A10G1127,Gh_A11G1852,Gh_A08G0612,Gh_D11G2427,Gh_A09G0853,Gh_D13G2361,Gh_D11G1758,Gh_A10G1819,Gh_D06G1621
GO:0000070	mitotic sister chromatid segregation	biological_process	0.078153	0.78066	2	351	64	48611	Gh_D11G2427,Gh_A13G2306
GO:0000075	cell cycle checkpoint	biological_process	0.078153	0.78066	2	351	64	48611	Gh_A13G2306,Gh_D09G1748
GO:0000819	sister chromatid segregation	biological_process	0.078153	0.78066	2	351	64	48611	Gh_A13G2306,Gh_D11G2427
GO:0051705	multi-organism behavior	biological_process	0.078153	0.78066	2	351	64	48611	Gh_A12G1614,Gh_A12G2648
GO:0072521	purine-containing compound metabolic process	biological_process	0.078342	0.7808	13	351	1156	48611	Gh_D11G1901,Gh_D04G1994,Gh_D09G1575,Gh_A12G1684,Gh_A11G1852,Gh_D13G1425,Gh_A01G1798,Gh_Sca004717G07,Gh_A05G3330,Gh_A03G0725,Gh_A03G1496,Gh_A13G1944,Gh_D10G2262
GO:0044036	cell wall macromolecule metabolic process	biological_process	0.078564	0.78126	3	351	138	48611	Gh_D02G2284,Gh_A06G0365,Gh_A03G1844
GO:0007049	cell cycle	biological_process	0.07923	0.78591	14	351	1271	48611	Gh_D10G1485,Gh_D11G2427,Gh_A13G2306,Gh_D07G0502,Gh_D01G0409,Gh_A05G3330,Gh_A12G0436,Gh_A11G2680,Gh_D04G0172,Gh_D05G1911,Gh_D13G0101,Gh_D09G1748,Gh_D13G0188,Gh_A11G2863
GO:0022414	reproductive process	biological_process	0.079578	0.78591	6	351	412	48611	Gh_A12G2648,Gh_A12G1614,Gh_A13G1455,Gh_D12G1543,Gh_A03G1427,Gh_A03G2031
GO:1901566	organonitrogen compound biosynthetic process	biological_process	0.080165	0.78591	40	351	4415	48611	Gh_D12G2681,Gh_D11G1612,Gh_D09G1818,Gh_A03G1923,Gh_D11G1901,Gh_A05G3224,Gh_D01G0898,Gh_D05G2629,Gh_A10G2072,Gh_D10G0456,Gh_A01G0316,Gh_A04G0147,Gh_D10G0665,Gh_D01G0919,Gh_A01G2143,Gh_D13G1425,Gh_A04G1093,Gh_D09G1748,Gh_A05G3517,Gh_D12G0568,Gh_A12G1614,Gh_A09G0965,Gh_D13G1319,Gh_A11G1003,Gh_A08G1995,Gh_A09G1320,Gh_A04G0975,Gh_A08G1859,Gh_A10G1099,Gh_D04G0172,Gh_A11G1852,Gh_D07G1596,Gh_Sca004717G07…
GO:0031647	regulation of protein stability	biological_process	0.080263	0.78591	2	351	65	48611	Gh_A06G1500,Gh_A04G1093
GO:0032269	negative regulation of cellular protein metabolic process	biological_process	0.080263	0.78591	2	351	65	48611	Gh_A13G2306,Gh_D01G0919
GO:0050821	protein stabilization	biological_process	0.080263	0.78591	2	351	65	48611	Gh_A06G1500,Gh_A04G1093
GO:0051248	negative regulation of protein metabolic process	biological_process	0.080263	0.78591	2	351	65	48611	Gh_D01G0919,Gh_A13G2306
GO:1902582	single-organism intracellular transport	biological_process	0.081144	0.79068	12	351	1051	48611	Gh_D02G1676,Gh_A03G1496,Gh_D04G0172,Gh_A08G1529,Gh_D10G2262,Gh_D01G0379,Gh_D11G2427,Gh_D05G2629,Gh_D13G1425,Gh_A05G3330,Gh_D12G1705,Gh_A12G0436
GO:0072511	divalent inorganic cation transport	biological_process	0.081704	0.79068	5	351	318	48611	Gh_D13G0101,Gh_D04G0172,Gh_A03G0410,Gh_A05G3517,Gh_A12G1614
GO:0009117	nucleotide metabolic process	biological_process	0.081905	0.79068	15	351	1392	48611	Gh_A03G0725,Gh_A03G1496,Gh_A13G1944,Gh_D10G2262,Gh_A11G1003,Gh_D11G1901,Gh_A12G1684,Gh_D09G1575,Gh_D04G1994,Gh_D13G1425,Gh_A11G1852,Gh_A01G1798,Gh_D12G2194,Gh_A05G3330,Gh_Sca004717G07
GO:0000272	polysaccharide catabolic process	biological_process	0.082391	0.79068	2	351	66	48611	Gh_D10G1605,Gh_A07G1008
GO:0006091	generation of precursor metabolites and energy	biological_process	0.083051	0.79068	10	351	835	48611	Gh_A13G1944,Gh_A12G1766,Gh_D04G0746,Gh_A04G1093,Gh_Sca004717G07,Gh_D04G0459,Gh_A01G1798,Gh_D11G2427,Gh_A12G1684,Gh_D09G1575
GO:0008113	peptide-methionine (S)-S-oxide reductase activity	molecular_function	0.083229	0.79068	1	351	12	48611	Gh_D09G2409
GO:0018196	peptidyl-asparagine modification	biological_process	0.083229	0.79068	1	351	12	48611	Gh_A12G1580
GO:0018279	protein N-linked glycosylation via asparagine	biological_process	0.083229	0.79068	1	351	12	48611	Gh_A12G1580
GO:0032954	regulation of cytokinetic process	biological_process	0.083229	0.79068	1	351	12	48611	Gh_D13G0188
GO:0032955	regulation of barrier septum assembly	biological_process	0.083229	0.79068	1	351	12	48611	Gh_D13G0188
GO:0051184	cofactor transporter activity	molecular_function	0.083229	0.79068	1	351	12	48611	Gh_D02G1815
GO:1901891	regulation of cell septum assembly	biological_process	0.083229	0.79068	1	351	12	48611	Gh_D13G0188
GO:1902412	regulation of mitotic cytokinesis	biological_process	0.083229	0.79068	1	351	12	48611	Gh_D13G0188
GO:1903436	regulation of mitotic cytokinetic process	biological_process	0.083229	0.79068	1	351	12	48611	Gh_D13G0188
GO:0009110	vitamin biosynthetic process	biological_process	0.083963	0.79259	4	351	228	48611	Gh_A05G3224,Gh_A12G1614,Gh_A05G3517,Gh_D10G0665
GO:0033178	proton-transporting two-sector ATPase complex, catalytic domain	cellular_component	0.083963	0.79259	4	351	228	48611	Gh_Sca004717G07,Gh_A11G1852,Gh_D11G1901,Gh_A11G2680
GO:0042364	water-soluble vitamin biosynthetic process	biological_process	0.083963	0.79259	4	351	228	48611	Gh_D10G0665,Gh_A05G3517,Gh_A05G3224,Gh_A12G1614
GO:0003918	DNA topoisomerase type II (ATP-hydrolyzing) activity	molecular_function	0.084535	0.79424	2	351	67	48611	Gh_A11G1852,Gh_A13G1455
GO:0061505	DNA topoisomerase II activity	molecular_function	0.084535	0.79424	2	351	67	48611	Gh_A13G1455,Gh_A11G1852
GO:0015399	primary active transmembrane transporter activity	molecular_function	0.085892	0.79424	7	351	522	48611	Gh_D07G0502,Gh_D04G0172,Gh_D13G1410,Gh_D11G1901,Gh_A11G2680,Gh_Sca004717G07,Gh_A11G1852
GO:0015405	P-P-bond-hydrolysis-driven transmembrane transporter activity	molecular_function	0.085892	0.79424	7	351	522	48611	Gh_A11G1852,Gh_Sca004717G07,Gh_D13G1410,Gh_A11G2680,Gh_D11G1901,Gh_D07G0502,Gh_D04G0172
GO:0006955	immune response	biological_process	0.086036	0.79424	4	351	230	48611	Gh_A11G1852,Gh_A07G1553,Gh_A11G2680,Gh_D03G0121
GO:0002376	immune system process	biological_process	0.087668	0.79424	5	351	325	48611	Gh_A11G1852,Gh_A06G1500,Gh_D03G0121,Gh_A11G2680,Gh_A07G1553
GO:0019866	organelle inner membrane	cellular_component	0.088421	0.79424	9	351	737	48611	Gh_A12G1614,Gh_D03G1132,Gh_A11G1852,Gh_Sca004717G07,Gh_A05G3330,Gh_A04G1093,Gh_A11G2680,Gh_A13G1944,Gh_D10G2262
GO:0042578	phosphoric ester hydrolase activity	molecular_function	0.088855	0.79424	8	351	631	48611	Gh_A03G0786,Gh_D12G2386,Gh_A11G1852,Gh_D04G0172,Gh_A01G0725,Gh_D10G2262,Gh_D07G1240,Gh_A01G0669
GO:0006553	lysine metabolic process	biological_process	0.088875	0.79424	2	351	69	48611	Gh_D05G2629,Gh_D10G0456
GO:0016051	carbohydrate biosynthetic process	biological_process	0.089011	0.79424	11	351	957	48611	Gh_A01G0725,Gh_D12G1820,Gh_D12G1659,Gh_D10G2262,Gh_D04G0694,Gh_A10G0336,Gh_D13G1983,Gh_D08G1786,Gh_D05G2629,Gh_A10G1127,Gh_A05G3413
GO:0042278	purine nucleoside metabolic process	biological_process	0.089169	0.79424	12	351	1069	48611	Gh_A03G0725,Gh_A03G1496,Gh_A13G1944,Gh_D10G2262,Gh_D11G1901,Gh_D09G1575,Gh_D04G1994,Gh_A12G1684,Gh_A01G1798,Gh_A11G1852,Gh_A05G3330,Gh_Sca004717G07
GO:0046128	purine ribonucleoside metabolic process	biological_process	0.089169	0.79424	12	351	1069	48611	Gh_A03G1496,Gh_A03G0725,Gh_D10G2262,Gh_A13G1944,Gh_D04G1994,Gh_D09G1575,Gh_A12G1684,Gh_D11G1901,Gh_A05G3330,Gh_Sca004717G07,Gh_A01G1798,Gh_A11G1852
GO:0008238	exopeptidase activity	molecular_function	0.089413	0.79424	5	351	327	48611	Gh_A05G3412,Gh_D03G1132,Gh_A09G1177,Gh_D07G0502,Gh_A01G0725
GO:0007067	mitotic nuclear division	biological_process	0.089423	0.79424	3	351	146	48611	Gh_A13G2306,Gh_D11G2427,Gh_A12G0436
GO:0046034	ATP metabolic process	biological_process	0.089498	0.79424	11	351	958	48611	Gh_A03G0725,Gh_A13G1944,Gh_D10G2262,Gh_D11G1901,Gh_D04G1994,Gh_D09G1575,Gh_A12G1684,Gh_A11G1852,Gh_A01G1798,Gh_A05G3330,Gh_Sca004717G07
GO:0015075	ion transmembrane transporter activity	molecular_function	0.089692	0.79424	29	351	3089	48611	Gh_A03G1923,Gh_A11G1097,Gh_A12G1614,Gh_D03G1132,Gh_D11G0471,Gh_A13G1954,Gh_A04G0147,Gh_A01G0725,Gh_D04G0746,Gh_D13G2512,Gh_D04G0172,Gh_A03G0410,Gh_A11G2426,Gh_A11G1852,Gh_A12G0436,Gh_Sca004717G07,Gh_A05G3330,Gh_A11G0408,Gh_D10G2303,Gh_A07G1317,Gh_D10G2262,Gh_A04G1093,Gh_A03G0725,Gh_D05G0127,Gh_A11G2680,Gh_D13G0101,Gh_A05G3517,Gh_D03G0971,Gh_A10G2021
GO:0042822	pyridoxal phosphate metabolic process	biological_process	0.089845	0.79424	1	351	13	48611	Gh_D10G0665
GO:0042823	pyridoxal phosphate biosynthetic process	biological_process	0.089845	0.79424	1	351	13	48611	Gh_D10G0665
GO:0043487	regulation of RNA stability	biological_process	0.089845	0.79424	1	351	13	48611	Gh_A01G1946
GO:0043488	regulation of mRNA stability	biological_process	0.089845	0.79424	1	351	13	48611	Gh_A01G1946
GO:0043489	RNA stabilization	biological_process	0.089845	0.79424	1	351	13	48611	Gh_A01G1946
GO:0046184	aldehyde biosynthetic process	biological_process	0.089845	0.79424	1	351	13	48611	Gh_D10G0665
GO:0048255	mRNA stabilization	biological_process	0.089845	0.79424	1	351	13	48611	Gh_A01G1946
GO:0003712	transcription cofactor activity	molecular_function	0.089861	0.79424	6	351	426	48611	Gh_A05G3330,Gh_A01G0316,Gh_D02G0743,Gh_A08G1954,Gh_A11G2680,Gh_D01G2280
GO:0015980	energy derivation by oxidation of organic compounds	biological_process	0.089861	0.79424	6	351	426	48611	Gh_D04G0746,Gh_A04G1093,Gh_A12G1684,Gh_D09G1575,Gh_D04G0459,Gh_A13G1944
GO:0009308	amine metabolic process	biological_process	0.090292	0.79424	5	351	328	48611	Gh_D10G0665,Gh_A11G1852,Gh_D04G0172,Gh_D07G0502,Gh_A04G1093
GO:0006026	aminoglycan catabolic process	biological_process	0.091069	0.79424	2	351	70	48611	Gh_A03G1844,Gh_D02G2284
GO:0009288	bacterial-type flagellum	cellular_component	0.091069	0.79424	2	351	70	48611	Gh_A05G3330,Gh_D11G2427
GO:0055086	nucleobase-containing small molecule metabolic process	biological_process	0.092009	0.79424	16	351	1534	48611	Gh_A03G0725,Gh_D10G2262,Gh_A13G1944,Gh_D07G2317,Gh_Sca004717G07,Gh_A05G3330,Gh_D12G2194,Gh_A11G1852,Gh_D13G1425,Gh_A03G1496,Gh_A11G1003,Gh_D09G1575,Gh_A12G1684,Gh_D04G1994,Gh_D11G1901,Gh_A01G1798
GO:0031967	organelle envelope	cellular_component	0.092297	0.79424	13	351	1189	48611	Gh_A11G1852,Gh_D13G1425,Gh_Sca004717G07,Gh_A05G3330,Gh_A12G1614,Gh_D01G0379,Gh_D10G1485,Gh_D03G1132,Gh_A13G1944,Gh_D10G2262,Gh_A04G1093,Gh_A11G2680,Gh_A03G1496
GO:0006766	vitamin metabolic process	biological_process	0.092402	0.79424	4	351	236	48611	Gh_D10G0665,Gh_A05G3224,Gh_A12G1614,Gh_A05G3517
GO:0006767	water-soluble vitamin metabolic process	biological_process	0.092402	0.79424	4	351	236	48611	Gh_D10G0665,Gh_A05G3517,Gh_A12G1614,Gh_A05G3224
GO:0019637	organophosphate metabolic process	biological_process	0.092792	0.79424	20	351	2008	48611	Gh_A12G0234,Gh_A01G1798,Gh_A12G1684,Gh_D09G1575,Gh_D04G1994,Gh_A03G1679,Gh_D11G1901,Gh_A11G1003,Gh_D10G0665,Gh_A03G1496,Gh_D12G2194,Gh_A05G3330,Gh_Sca004717G07,Gh_A11G1852,Gh_D13G1425,Gh_D07G2317,Gh_D08G0759,Gh_D10G2262,Gh_A13G1944,Gh_A03G0725
GO:0007218	neuropeptide signaling pathway	biological_process	0.093279	0.79424	2	351	71	48611	Gh_A13G1386,Gh_A11G1852
GO:0010608	posttranscriptional regulation of gene expression	biological_process	0.093279	0.79424	2	351	71	48611	Gh_D01G0919,Gh_A01G1946
GO:0030269	tetrahydromethanopterin S-methyltransferase activity	molecular_function	0.093279	0.79424	2	351	71	48611	Gh_D04G0746,Gh_D04G0459
GO:0042086	5-methyl-5,6,7,8-tetrahydromethanopterin-dependent methyltransferase activity	molecular_function	0.093279	0.79424	2	351	71	48611	Gh_D04G0746,Gh_D04G0459
GO:0000989	transcription factor activity, transcription factor binding	molecular_function	0.0937	0.79424	6	351	431	48611	Gh_A11G2680,Gh_D01G2280,Gh_D02G0743,Gh_A08G1954,Gh_A01G0316,Gh_A05G3330
GO:0006310	DNA recombination	biological_process	0.094417	0.79424	8	351	640	48611	Gh_D04G0172,Gh_A04G0147,Gh_A07G2294,Gh_D11G1830,Gh_D12G2350,Gh_D07G0502,Gh_D01G0898,Gh_D03G0121
GO:0009893	positive regulation of metabolic process	biological_process	0.094479	0.79424	6	351	432	48611	Gh_A03G1496,Gh_D02G1676,Gh_D10G2262,Gh_D12G2350,Gh_D04G1173,Gh_A11G1852
GO:0033014	tetrapyrrole biosynthetic process	biological_process	0.095047	0.79424	8	351	641	48611	Gh_A05G3330,Gh_A05G3224,Gh_D08G0759,Gh_A12G1614,Gh_D01G0898,Gh_D10G2262,Gh_A05G3517,Gh_D04G0172
GO:0065003	macromolecular complex assembly	biological_process	0.095248	0.79424	9	351	749	48611	Gh_A11G2680,Gh_A03G1496,Gh_A11G2863,Gh_A01G1256,Gh_D10G2262,Gh_D02G2420,Gh_D07G0502,Gh_D10G2417,Gh_A11G1852
GO:0016705	oxidoreductase activity, acting on paired donors, with incorporation or reduction of molecular oxygen	molecular_function	0.09533	0.79424	15	351	1426	48611	Gh_A08G2364,Gh_D10G1401,Gh_D12G2194,Gh_A05G3033,Gh_D08G0759,Gh_A03G1004,Gh_A09G0916,Gh_D06G0087,Gh_A04G0398,Gh_A03G1352,Gh_A05G3811,Gh_A04G1093,Gh_D10G2457,Gh_D12G1468,Gh_D03G0537
GO:0030076	light-harvesting complex	cellular_component	0.095504	0.79424	2	351	72	48611	Gh_A12G1766,Gh_A13G1944
GO:0060589	nucleoside-triphosphatase regulator activity	molecular_function	0.095667	0.79424	4	351	239	48611	Gh_A10G1127,Gh_A03G0338,Gh_A10G1819,Gh_D11G1758
GO:0009144	purine nucleoside triphosphate metabolic process	biological_process	0.095976	0.79424	11	351	971	48611	Gh_A03G0725,Gh_D10G2262,Gh_A13G1944,Gh_A12G1684,Gh_D09G1575,Gh_D04G1994,Gh_D11G1901,Gh_A05G3330,Gh_Sca004717G07,Gh_A01G1798,Gh_A11G1852
GO:0009199	ribonucleoside triphosphate metabolic process	biological_process	0.095976	0.79424	11	351	971	48611	Gh_A03G0725,Gh_A13G1944,Gh_D10G2262,Gh_D11G1901,Gh_D04G1994,Gh_D09G1575,Gh_A12G1684,Gh_A11G1852,Gh_A01G1798,Gh_Sca004717G07,Gh_A05G3330
GO:0009205	purine ribonucleoside triphosphate metabolic process	biological_process	0.095976	0.79424	11	351	971	48611	Gh_D10G2262,Gh_A13G1944,Gh_A03G0725,Gh_Sca004717G07,Gh_A05G3330,Gh_A11G1852,Gh_A01G1798,Gh_D04G1994,Gh_D09G1575,Gh_A12G1684,Gh_D11G1901
GO:0002520	immune system development	biological_process	0.096413	0.79424	1	351	14	48611	Gh_A06G1500
GO:0004799	thymidylate synthase activity	molecular_function	0.096413	0.79424	1	351	14	48611	Gh_A11G1003
GO:0005313	L-glutamate transmembrane transporter activity	molecular_function	0.096413	0.79424	1	351	14	48611	Gh_A11G1852
GO:0007338	single fertilization	biological_process	0.096413	0.79424	1	351	14	48611	Gh_A13G1455
GO:0007591	molting cycle, chitin-based cuticle	biological_process	0.096413	0.79424	1	351	14	48611	Gh_A11G1852
GO:0008255	ecdysis-triggering hormone activity	molecular_function	0.096413	0.79424	1	351	14	48611	Gh_A11G1852
GO:0008837	diaminopimelate epimerase activity	molecular_function	0.096413	0.79424	1	351	14	48611	Gh_D10G0456
GO:0009566	fertilization	biological_process	0.096413	0.79424	1	351	14	48611	Gh_A13G1455
GO:0015172	acidic amino acid transmembrane transporter activity	molecular_function	0.096413	0.79424	1	351	14	48611	Gh_A11G1852
GO:0015501	glutamate:sodium symporter activity	molecular_function	0.096413	0.79424	1	351	14	48611	Gh_A11G1852
GO:0015800	acidic amino acid transport	biological_process	0.096413	0.79424	1	351	14	48611	Gh_A11G1852
GO:0015807	L-amino acid transport	biological_process	0.096413	0.79424	1	351	14	48611	Gh_A11G1852
GO:0015813	L-glutamate transport	biological_process	0.096413	0.79424	1	351	14	48611	Gh_A11G1852
GO:0018990	ecdysis, chitin-based cuticle	biological_process	0.096413	0.79424	1	351	14	48611	Gh_A11G1852
GO:0022404	molting cycle process	biological_process	0.096413	0.79424	1	351	14	48611	Gh_A11G1852
GO:0042303	molting cycle	biological_process	0.096413	0.79424	1	351	14	48611	Gh_A11G1852
GO:0042720	mitochondrial inner membrane peptidase complex	cellular_component	0.096413	0.79424	1	351	14	48611	Gh_A11G2680
GO:0016108	tetraterpenoid metabolic process	biological_process	0.096511	0.79424	3	351	151	48611	Gh_A04G1093,Gh_D08G0759,Gh_A09G0916
GO:0016109	tetraterpenoid biosynthetic process	biological_process	0.096511	0.79424	3	351	151	48611	Gh_D08G0759,Gh_A04G1093,Gh_A09G0916
GO:0016116	carotenoid metabolic process	biological_process	0.096511	0.79424	3	351	151	48611	Gh_A09G0916,Gh_D08G0759,Gh_A04G1093
GO:0016117	carotenoid biosynthetic process	biological_process	0.096511	0.79424	3	351	151	48611	Gh_A09G0916,Gh_A04G1093,Gh_D08G0759
GO:0019953	sexual reproduction	biological_process	0.096767	0.79424	4	351	240	48611	Gh_A12G2648,Gh_A12G1614,Gh_A13G1455,Gh_A03G2031
GO:0031329	regulation of cellular catabolic process	biological_process	0.096767	0.79424	4	351	240	48611	Gh_D04G1173,Gh_D10G2262,Gh_A03G1496,Gh_A13G2306
GO:0000105	histidine biosynthetic process	biological_process	0.097745	0.79746	2	351	73	48611	Gh_A04G0975,Gh_D10G0665
GO:0007346	regulation of mitotic cell cycle	biological_process	0.097745	0.79746	2	351	73	48611	Gh_A13G2306,Gh_D13G0188
GO:0044087	regulation of cellular component biogenesis	biological_process	0.097745	0.79746	2	351	73	48611	Gh_A11G2680,Gh_D13G0188
GO:0008202	steroid metabolic process	biological_process	0.097874	0.79746	4	351	241	48611	Gh_D05G1836,Gh_D05G2629,Gh_D05G3816,Gh_A05G3413
GO:0044424	intracellular part	cellular_component	0.099738	0.79947	101	351	12474	48611	Gh_A12G0371,Gh_D12G1747,Gh_D11G1901,Gh_A03G1923,Gh_D01G0409,Gh_Sca006756G05,Gh_D10G1893,Gh_D12G2681,Gh_D08G1984,Gh_D13G2389,Gh_A12G1650,Gh_A01G2143,Gh_A01G0725,Gh_A12G2234,Gh_A01G0316,Gh_A04G0147,Gh_D02G0743,Gh_D03G1234,Gh_D13G1425,Gh_D10G0643,Gh_D13G0101,Gh_A08G1954,Gh_D09G1748,Gh_D05G0127,Gh_D02G0057,Gh_D01G0379,Gh_D03G1132,Gh_D09G1778,Gh_A05G3033,Gh_D07G1260,Gh_A03G1496,Gh_D02G1676,Gh_A08G1859…
GO:0022891	substrate-specific transmembrane transporter activity	molecular_function	0.099743	0.79947	30	351	3249	48611	Gh_A07G1317,Gh_D10G2262,Gh_D05G0127,Gh_A11G2680,Gh_A03G0725,Gh_A04G1093,Gh_A05G3517,Gh_D03G0971,Gh_A10G2021,Gh_D13G0101,Gh_A11G1852,Gh_A11G2426,Gh_A05G3330,Gh_Sca004717G07,Gh_A12G0436,Gh_A11G0408,Gh_D10G2303,Gh_A04G0147,Gh_A13G1954,Gh_D11G0471,Gh_D04G0746,Gh_A01G0725,Gh_D13G2512,Gh_A03G0410,Gh_D04G0172,Gh_A03G1923,Gh_A11G1097,Gh_A12G1614,Gh_D03G1132,Gh_D11G2427
GO:0003697	single-stranded DNA binding	molecular_function	0.1	0.79947	2	351	74	48611	Gh_A11G1852,Gh_D10G1485
GO:0005096	GTPase activator activity	molecular_function	0.1	0.79947	2	351	74	48611	Gh_A10G1127,Gh_A10G1819
GO:0016311	dephosphorylation	biological_process	0.1	0.79947	2	351	74	48611	Gh_A11G1852,Gh_D12G2386
GO:0009141	nucleoside triphosphate metabolic process	biological_process	0.1001	0.79947	11	351	979	48611	Gh_D10G2262,Gh_A13G1944,Gh_A03G0725,Gh_A05G3330,Gh_Sca004717G07,Gh_A01G1798,Gh_A11G1852,Gh_D09G1575,Gh_D04G1994,Gh_A12G1684,Gh_D11G1901
GO:0034622	cellular macromolecular complex assembly	biological_process	0.10018	0.79947	8	351	649	48611	Gh_A11G2680,Gh_A03G1496,Gh_D10G2262,Gh_A01G1256,Gh_D10G2417,Gh_D02G2420,Gh_D07G0502,Gh_A11G1852
GO:0008047	enzyme activator activity	molecular_function	0.10087	0.79947	3	351	154	48611	Gh_A10G1819,Gh_A10G1127,Gh_A11G1852
GO:0016247	channel regulator activity	molecular_function	0.10123	0.79947	4	351	244	48611	Gh_D13G2361,Gh_D06G1621,Gh_D11G2427,Gh_A12G1650
GO:0003676	nucleic acid binding	molecular_function	0.10136	0.79947	82	351	9959	48611	Gh_D03G1234,Gh_D11G2433,Gh_D02G0743,Gh_A05G0618,Gh_A05G3517,Gh_D05G1911,Gh_A11G2494,Gh_D01G0409,Gh_D10G1893,Gh_D13G2389,Gh_D12G1747,Gh_A12G2600,Gh_D05G2302,Gh_D02G0593,Gh_A10G1819,Gh_D11G1830,Gh_A01G0316,Gh_D12G1399,Gh_A04G0147,Gh_Sca004981G04,Gh_A12G1650,Gh_D01G0919,Gh_A13G1455,Gh_A11G1852,Gh_D10G2303,Gh_D11G3231,Gh_D07G1786,Gh_A01G0073,Gh_A03G0338,Gh_D04G0694,Gh_D12G2739,Gh_A11G0485,Gh_A09G1177…
GO:0043933	macromolecular complex subunit organization	biological_process	0.1016	0.79947	12	351	1095	48611	Gh_A11G1852,Gh_A11G0408,Gh_D02G2420,Gh_D07G0502,Gh_A11G0261,Gh_D10G2417,Gh_A11G2863,Gh_D11G0471,Gh_A01G1256,Gh_D10G2262,Gh_A11G2680,Gh_A03G1496
GO:0004842	ubiquitin-protein transferase activity	molecular_function	0.10214	0.79947	10	351	871	48611	Gh_A11G1097,Gh_D10G1893,Gh_D08G1984,Gh_D05G2565,Gh_D09G1778,Gh_A02G0044,Gh_D02G0057,Gh_A05G2774,Gh_D11G1714,Gh_A11G3090
GO:0019787	ubiquitin-like protein transferase activity	molecular_function	0.10214	0.79947	10	351	871	48611	Gh_D02G0057,Gh_A05G2774,Gh_A11G3090,Gh_D11G1714,Gh_A11G1097,Gh_D08G1984,Gh_D10G1893,Gh_D05G2565,Gh_A02G0044,Gh_D09G1778
GO:0017080	sodium channel regulator activity	molecular_function	0.10227	0.79947	2	351	75	48611	Gh_D13G2361,Gh_A12G1650
GO:0019871	sodium channel inhibitor activity	molecular_function	0.10227	0.79947	2	351	75	48611	Gh_D13G2361,Gh_A12G1650
GO:0000279	M phase	biological_process	0.10293	0.79947	1	351	15	48611	Gh_A11G1852
GO:0005732	small nucleolar ribonucleoprotein complex	cellular_component	0.10293	0.79947	1	351	15	48611	Gh_D11G2427
GO:0016984	ribulose-bisphosphate carboxylase activity	molecular_function	0.10293	0.79947	1	351	15	48611	Gh_Sca006756G06
GO:0022403	cell cycle phase	biological_process	0.10293	0.79947	1	351	15	48611	Gh_A11G1852
GO:0033130	acetylcholine receptor binding	molecular_function	0.10293	0.79947	1	351	15	48611	Gh_A04G1093
GO:0044848	biological phase	biological_process	0.10293	0.79947	1	351	15	48611	Gh_A11G1852
GO:0045211	postsynaptic membrane	cellular_component	0.10293	0.79947	1	351	15	48611	Gh_A04G1093
GO:0047661	amino-acid racemase activity	molecular_function	0.10293	0.79947	1	351	15	48611	Gh_D10G0456
GO:0097060	synaptic membrane	cellular_component	0.10293	0.79947	1	351	15	48611	Gh_A04G1093
GO:0098590	plasma membrane region	cellular_component	0.10293	0.79947	1	351	15	48611	Gh_A04G1093
GO:0098794	postsynapse	cellular_component	0.10293	0.79947	1	351	15	48611	Gh_A04G1093
GO:0005623	cell	cellular_component	0.10313	0.79947	114	351	14239	48611	Gh_D01G0379,Gh_D03G1132,Gh_A05G3033,Gh_D09G1778,Gh_D12G1705,Gh_D07G1260,Gh_A03G1496,Gh_D04G0172,Gh_D02G1676,Gh_A08G1859,Gh_A08G1995,Gh_A10G1919,Gh_D11G0471,Gh_A12G2648,Gh_D11G3231,Gh_D08G0759,Gh_Sca004717G07,Gh_A13G1455,Gh_A11G1852,Gh_A09G1177,Gh_D12G0062,Gh_A11G2680,Gh_A08G2548,Gh_A01G0073,Gh_D04G0694,Gh_D09G2201,Gh_A11G2863,Gh_D12G2520,Gh_D12G1747,Gh_A12G0371,Gh_D11G1901,Gh_A10G1819,Gh_A03G1923…
GO:0044464	cell part	cellular_component	0.10313	0.79947	114	351	14239	48611	Gh_D07G0502,Gh_D05G2565,Gh_A13G0128,Gh_A11G0261,Gh_D10G1485,Gh_D11G0563,Gh_A12G0436,Gh_A12G1580,Gh_A10G1127,Gh_A05G3330,Gh_D07G1596,Gh_A01G2139,Gh_A12G1766,Gh_A05G3811,Gh_D11G1714,Gh_A03G0725,Gh_D10G2262,Gh_A13G1944,Gh_A05G2774,Gh_D08G0269,Gh_A09G0965,Gh_A02G0044,Gh_A12G1614,Gh_A11G1097,Gh_D12G0568,Gh_A01G1462,Gh_A11G2492,Gh_A10G1099,Gh_D01G1128,Gh_D12G2354,Gh_A01G1256,Gh_D12G2350,Gh_D13G1319,Gh_…
GO:0008094	DNA-dependent ATPase activity	molecular_function	0.10531	0.80745	3	351	157	48611	Gh_D12G0062,Gh_A11G1852,Gh_A13G1455
GO:0046148	pigment biosynthetic process	biological_process	0.10542	0.80745	7	351	550	48611	Gh_A09G0916,Gh_D01G0898,Gh_D04G0172,Gh_A04G1093,Gh_D08G0759,Gh_D10G2262,Gh_A05G3330
GO:0006814	sodium ion transport	biological_process	0.10578	0.80745	4	351	248	48611	Gh_D12G2354,Gh_D10G2303,Gh_A11G1852,Gh_A13G1954
GO:0048609	multicellular organismal reproductive process	biological_process	0.1068	0.80745	3	351	158	48611	Gh_A12G2648,Gh_A12G1614,Gh_A03G2031
GO:0006547	histidine metabolic process	biological_process	0.10685	0.80745	2	351	77	48611	Gh_D10G0665,Gh_A04G0975
GO:0031984	organelle subcompartment	cellular_component	0.10685	0.80745	2	351	77	48611	Gh_D11G0471,Gh_D05G2629
GO:0052803	imidazole-containing compound metabolic process	biological_process	0.10685	0.80745	2	351	77	48611	Gh_A04G0975,Gh_D10G0665
GO:0098791	Golgi subcompartment	cellular_component	0.10685	0.80745	2	351	77	48611	Gh_D05G2629,Gh_D11G0471
GO:0044262	cellular carbohydrate metabolic process	biological_process	0.10866	0.80745	11	351	995	48611	Gh_D12G1820,Gh_A01G0725,Gh_D12G1659,Gh_A01G0669,Gh_D10G2262,Gh_A10G0336,Gh_D13G1983,Gh_D08G1786,Gh_D05G2629,Gh_A10G1127,Gh_A05G3413
GO:0010256	endomembrane system organization	biological_process	0.10916	0.80745	2	351	78	48611	Gh_D05G2629,Gh_A01G0316
GO:0009119	ribonucleoside metabolic process	biological_process	0.10922	0.80745	12	351	1110	48611	Gh_D11G1901,Gh_D09G1575,Gh_A12G1684,Gh_D04G1994,Gh_A11G1852,Gh_A01G1798,Gh_A05G3330,Gh_Sca004717G07,Gh_A03G0725,Gh_A03G1496,Gh_A13G1944,Gh_D10G2262
GO:0009894	regulation of catabolic process	biological_process	0.10926	0.80745	4	351	251	48611	Gh_A03G1496,Gh_A13G2306,Gh_D10G2262,Gh_D04G1173
GO:0046907	intracellular transport	biological_process	0.10936	0.80745	21	351	2175	48611	Gh_A03G1679,Gh_D11G1901,Gh_D11G2427,Gh_A02G1349,Gh_D05G2629,Gh_D01G0379,Gh_D12G1705,Gh_A12G0234,Gh_D02G1676,Gh_D04G0172,Gh_A03G1496,Gh_A08G1529,Gh_A06G1647,Gh_D10G1485,Gh_D13G1425,Gh_A11G1852,Gh_A05G3330,Gh_A12G0436,Gh_A04G1093,Gh_A07G1553,Gh_D10G2262
GO:0006636	unsaturated fatty acid biosynthetic process	biological_process	0.10941	0.80745	1	351	16	48611	Gh_Sca004981G04
GO:0006690	icosanoid metabolic process	biological_process	0.10941	0.80745	1	351	16	48611	Gh_Sca004981G04
GO:0006691	leukotriene metabolic process	biological_process	0.10941	0.80745	1	351	16	48611	Gh_Sca004981G04
GO:0007157	heterophilic cell-cell adhesion via plasma membrane cell adhesion molecules	biological_process	0.10941	0.80745	1	351	16	48611	Gh_A05G3542
GO:0007622	rhythmic behavior	biological_process	0.10941	0.80745	1	351	16	48611	Gh_D02G1676
GO:0016499	orexin receptor activity	molecular_function	0.10941	0.80745	1	351	16	48611	Gh_D02G1676
GO:0017148	negative regulation of translation	biological_process	0.10941	0.80745	1	351	16	48611	Gh_D01G0919
GO:0019370	leukotriene biosynthetic process	biological_process	0.10941	0.80745	1	351	16	48611	Gh_Sca004981G04
GO:0022410	circadian sleep/wake cycle process	biological_process	0.10941	0.80745	1	351	16	48611	Gh_D02G1676
GO:0033559	unsaturated fatty acid metabolic process	biological_process	0.10941	0.80745	1	351	16	48611	Gh_Sca004981G04
GO:0034249	negative regulation of cellular amide metabolic process	biological_process	0.10941	0.80745	1	351	16	48611	Gh_D01G0919
GO:0042745	circadian sleep/wake cycle	biological_process	0.10941	0.80745	1	351	16	48611	Gh_D02G1676
GO:0046456	icosanoid biosynthetic process	biological_process	0.10941	0.80745	1	351	16	48611	Gh_Sca004981G04
GO:0048512	circadian behavior	biological_process	0.10941	0.80745	1	351	16	48611	Gh_D02G1676
GO:1901568	fatty acid derivative metabolic process	biological_process	0.10941	0.80745	1	351	16	48611	Gh_Sca004981G04
GO:1901570	fatty acid derivative biosynthetic process	biological_process	0.10941	0.80745	1	351	16	48611	Gh_Sca004981G04
GO:0035556	intracellular signal transduction	biological_process	0.11055	0.81456	14	351	1344	48611	Gh_D07G0502,Gh_D10G1485,Gh_D13G1410,Gh_A10G1819,Gh_A10G1127,Gh_A11G1852,Gh_D01G0919,Gh_D13G0101,Gh_A09G1177,Gh_D12G0062,Gh_D04G0172,Gh_A11G2902,Gh_D04G0694,Gh_A01G0316
GO:0044455	mitochondrial membrane part	cellular_component	0.11089	0.81567	8	351	665	48611	Gh_Sca004717G07,Gh_A05G3330,Gh_A11G1852,Gh_D03G1132,Gh_D10G2262,Gh_A13G1944,Gh_A04G1093,Gh_A11G2680
GO:0032504	multicellular organism reproduction	biological_process	0.11134	0.81739	3	351	161	48611	Gh_A03G2031,Gh_A12G2648,Gh_A12G1614
GO:0006904	vesicle docking involved in exocytosis	biological_process	0.11149	0.81739	2	351	79	48611	Gh_D07G0502,Gh_A12G0371
GO:0046872	metal ion binding	molecular_function	0.11195	0.81945	66	351	7911	48611	Gh_D11G1279,Gh_D01G0898,Gh_A04G0398,Gh_D12G2617,Gh_D10G0456,Gh_A08G1529,Gh_A03G1352,Gh_A13G1450,Gh_A13G0296,Gh_D08G1817,Gh_A04G1093,Gh_Sca006756G06,Gh_A10G2071,Gh_D02G1140,Gh_D05G3719,Gh_D13G0188,Gh_A11G1755,Gh_D12G2354,Gh_D08G1394,Gh_A12G0697,Gh_A07G0400,Gh_A12G0436,Gh_A12G1580,Gh_D12G2194,Gh_A11G2426,Gh_D10G1401,Gh_D05G2565,Gh_D07G0502,Gh_D06G0087,Gh_D11G0563,Gh_D10G2262,Gh_A05G2774,Gh_D08G0269…
GO:0043232	intracellular non-membrane-bounded organelle	cellular_component	0.11266	0.82126	27	351	2920	48611	Gh_D13G1319,Gh_A01G0316,Gh_A04G0147,Gh_A10G1099,Gh_A01G2143,Gh_A08G1859,Gh_A03G1923,Gh_D12G0568,Gh_D09G1818,Gh_D12G2681,Gh_D11G1612,Gh_D11G2427,Gh_A10G2072,Gh_A09G0965,Gh_D10G2262,Gh_D09G1748,Gh_A01G2139,Gh_D12G0062,Gh_A04G1093,Gh_A05G3811,Gh_A11G2680,Gh_A13G1455,Gh_A12G0436,Gh_A05G3330,Gh_A11G1852,Gh_D07G1596,Gh_D07G0502
GO:0048519	negative regulation of biological process	biological_process	0.11293	0.82126	7	351	560	48611	Gh_A05G3330,Gh_D01G0919,Gh_A13G2306,Gh_A13G0128,Gh_D08G1394,Gh_D10G1485,Gh_A11G2680
GO:0019012	virion	cellular_component	0.11346	0.82126	18	351	1824	48611	Gh_A04G0109,Gh_D11G1068,Gh_D05G0075,Gh_D02G1676,Gh_A03G1496,Gh_A05G1584,Gh_A11G1097,Gh_D11G2427,Gh_D07G1489,Gh_A11G2863,Gh_A11G2680,Gh_A12G1766,Gh_A06G0430,Gh_D09G1748,Gh_A11G1852,Gh_D11G1797,Gh_A12G0436,Gh_D02G0743
GO:0017119	Golgi transport complex	cellular_component	0.11383	0.82126	2	351	80	48611	Gh_D13G1425,Gh_D12G2235
GO:0000281	mitotic cytokinesis	biological_process	0.11441	0.82126	3	351	163	48611	Gh_D07G0502,Gh_D01G0409,Gh_D13G0188
GO:0000917	barrier septum assembly	biological_process	0.11441	0.82126	3	351	163	48611	Gh_D01G0409,Gh_D13G0188,Gh_D07G0502
GO:0004866	endopeptidase inhibitor activity	molecular_function	0.11441	0.82126	3	351	163	48611	Gh_D12G1399,Gh_D04G0198,Gh_A09G0853
GO:0032506	cytokinetic process	biological_process	0.11441	0.82126	3	351	163	48611	Gh_D01G0409,Gh_D13G0188,Gh_D07G0502
GO:0061135	endopeptidase regulator activity	molecular_function	0.11441	0.82126	3	351	163	48611	Gh_A09G0853,Gh_D04G0198,Gh_D12G1399
GO:0061640	cytoskeleton-dependent cytokinesis	biological_process	0.11441	0.82126	3	351	163	48611	Gh_D07G0502,Gh_D01G0409,Gh_D13G0188
GO:0090529	cell septum assembly	biological_process	0.11441	0.82126	3	351	163	48611	Gh_D13G0188,Gh_D01G0409,Gh_D07G0502
GO:1902410	mitotic cytokinetic process	biological_process	0.11441	0.82126	3	351	163	48611	Gh_D01G0409,Gh_D13G0188,Gh_D07G0502
GO:0003689	DNA clamp loader activity	molecular_function	0.11583	0.82488	1	351	17	48611	Gh_D12G0062
GO:0005657	replication fork	cellular_component	0.11583	0.82488	1	351	17	48611	Gh_D12G0062
GO:0005663	DNA replication factor C complex	cellular_component	0.11583	0.82488	1	351	17	48611	Gh_D12G0062
GO:0030261	chromosome condensation	biological_process	0.11583	0.82488	1	351	17	48611	Gh_D11G2427
GO:0033170	protein-DNA loading ATPase activity	molecular_function	0.11583	0.82488	1	351	17	48611	Gh_D12G0062
GO:0051130	positive regulation of cellular component organization	biological_process	0.11618	0.82599	2	351	81	48611	Gh_D05G2629,Gh_A11G2680
GO:0003950	NAD+ ADP-ribosyltransferase activity	molecular_function	0.11854	0.83748	2	351	82	48611	Gh_A05G3033,Gh_D01G1128
GO:0004721	phosphoprotein phosphatase activity	molecular_function	0.11854	0.83748	2	351	82	48611	Gh_D12G2386,Gh_A11G1852
GO:0005852	eukaryotic translation initiation factor 3 complex	cellular_component	0.11854	0.83748	2	351	82	48611	Gh_A05G3224,Gh_A11G1852
GO:0000003	reproduction	biological_process	0.11854	0.83748	6	351	461	48611	Gh_A03G2031,Gh_D01G0409,Gh_A13G1455,Gh_A12G1614,Gh_A12G2648,Gh_D07G0502
GO:0006304	DNA modification	biological_process	0.12063	0.84867	3	351	167	48611	Gh_A05G3224,Gh_A11G1852,Gh_A07G1309
GO:0051082	unfolded protein binding	molecular_function	0.12073	0.84867	5	351	360	48611	Gh_D10G1485,Gh_A13G0504,Gh_D11G2427,Gh_A05G3330,Gh_A10G1127
GO:0006275	regulation of DNA replication	biological_process	0.12091	0.84867	2	351	83	48611	Gh_D09G2200,Gh_A11G1852
GO:0051641	cellular localization	biological_process	0.12185	0.84867	24	351	2576	48611	Gh_A11G1852,Gh_D13G1425,Gh_A12G0436,Gh_A05G3330,Gh_D07G0502,Gh_D10G1485,Gh_D10G2262,Gh_A07G1553,Gh_A04G1093,Gh_A12G1766,Gh_D12G1705,Gh_A12G0234,Gh_A03G1679,Gh_D11G1901,Gh_D05G2629,Gh_D11G2427,Gh_A02G1349,Gh_D01G0379,Gh_A12G0371,Gh_A08G1529,Gh_A06G1647,Gh_D02G1676,Gh_D04G0172,Gh_A03G1496
GO:0000077	DNA damage checkpoint	biological_process	0.12222	0.84867	1	351	18	48611	Gh_D09G1748
GO:0004814	arginine-tRNA ligase activity	molecular_function	0.12222	0.84867	1	351	18	48611	Gh_A09G1320
GO:0006420	arginyl-tRNA aminoacylation	biological_process	0.12222	0.84867	1	351	18	48611	Gh_A09G1320
GO:0015179	L-amino acid transmembrane transporter activity	molecular_function	0.12222	0.84867	1	351	18	48611	Gh_A11G1852
GO:0015385	sodium:proton antiporter activity	molecular_function	0.12222	0.84867	1	351	18	48611	Gh_A13G1954
GO:0030896	checkpoint clamp complex	cellular_component	0.12222	0.84867	1	351	18	48611	Gh_D09G1748
GO:0031570	DNA integrity checkpoint	biological_process	0.12222	0.84867	1	351	18	48611	Gh_D09G1748
GO:0016055	Wnt signaling pathway	biological_process	0.1233	0.85287	2	351	84	48611	Gh_D01G0409,Gh_A05G3033
GO:0016052	carbohydrate catabolic process	biological_process	0.12366	0.85287	4	351	263	48611	Gh_A01G1798,Gh_A07G1008,Gh_Sca004717G07,Gh_D10G1605
GO:0019693	ribose phosphate metabolic process	biological_process	0.12509	0.85287	13	351	1256	48611	Gh_D09G1575,Gh_A12G1684,Gh_D04G1994,Gh_D11G1901,Gh_A05G3330,Gh_Sca004717G07,Gh_A11G1852,Gh_D13G1425,Gh_A01G1798,Gh_A03G1496,Gh_A03G0725,Gh_D10G2262,Gh_A13G1944
GO:0043169	cation binding	molecular_function	0.12549	0.85287	66	351	7975	48611	Gh_D10G1895,Gh_D09G1778,Gh_A05G3033,Gh_A03G0410,Gh_A03G1496,Gh_D02G1676,Gh_A10G1919,Gh_D09G2409,Gh_Sca004717G07,Gh_A11G1852,Gh_A11G0485,Gh_D11G1460,Gh_A11G2680,Gh_D04G0694,Gh_D09G1575,Gh_D05G2907,Gh_A10G1819,Gh_A11G2494,Gh_A01G1798,Gh_A08G2364,Gh_D10G1893,Gh_D08G1984,Gh_D04G1173,Gh_A05G1584,Gh_A13G0504,Gh_D01G0919,Gh_D03G0537,Gh_A01G0316,Gh_Sca004981G04,Gh_D11G2433,Gh_A05G0618,Gh_D13G1425,Gh_D02G…
GO:0048856	anatomical structure development	biological_process	0.12567	0.85287	6	351	469	48611	Gh_D01G2280,Gh_D02G1676,Gh_A06G1500,Gh_D10G0456,Gh_A11G1852,Gh_A01G0073
GO:0008378	galactosyltransferase activity	molecular_function	0.12569	0.85287	2	351	85	48611	Gh_D12G2386,Gh_D11G0471
GO:0009636	response to toxic substance	biological_process	0.12569	0.85287	2	351	85	48611	Gh_A01G0316,Gh_A03G0410
GO:0051649	establishment of localization in cell	biological_process	0.12643	0.85287	23	351	2465	48611	Gh_A06G1647,Gh_A08G1529,Gh_A03G1496,Gh_D04G0172,Gh_D02G1676,Gh_D12G1705,Gh_A12G0234,Gh_D11G2427,Gh_D05G2629,Gh_A12G0371,Gh_D01G0379,Gh_A02G1349,Gh_D11G1901,Gh_A03G1679,Gh_D10G2262,Gh_A04G1093,Gh_A07G1553,Gh_A05G3330,Gh_A12G0436,Gh_D13G1425,Gh_A11G1852,Gh_D10G1485,Gh_D07G0502
GO:0016831	carboxy-lyase activity	molecular_function	0.12691	0.85287	5	351	366	48611	Gh_D10G2303,Gh_D03G0537,Gh_A04G1093,Gh_Sca006756G06,Gh_A11G1852
GO:0006323	DNA packaging	biological_process	0.12698	0.85287	3	351	171	48611	Gh_D11G2427,Gh_D10G2417,Gh_A11G1852
GO:0009132	nucleoside diphosphate metabolic process	biological_process	0.12698	0.85287	3	351	171	48611	Gh_A01G1798,Gh_Sca004717G07,Gh_D07G2317
GO:0044433	cytoplasmic vesicle part	cellular_component	0.12738	0.85287	4	351	266	48611	Gh_A13G1944,Gh_A08G1529,Gh_D10G1485,Gh_A12G1766
GO:0019028	viral capsid	cellular_component	0.12738	0.85287	10	351	913	48611	Gh_A11G2863,Gh_D07G1489,Gh_D02G1676,Gh_D11G1068,Gh_A11G2680,Gh_A06G0430,Gh_A03G1496,Gh_A11G1852,Gh_A12G0436,Gh_D11G2427
GO:0031975	envelope	cellular_component	0.12777	0.85287	13	351	1261	48611	Gh_D10G2262,Gh_A13G1944,Gh_A03G1496,Gh_A04G1093,Gh_A11G2680,Gh_Sca004717G07,Gh_A05G3330,Gh_A11G1852,Gh_D13G1425,Gh_D01G0379,Gh_D03G1132,Gh_D10G1485,Gh_A12G1614
GO:0009607	response to biotic stimulus	biological_process	0.12795	0.85287	7	351	579	48611	Gh_D05G3925,Gh_Sca004981G04,Gh_D01G1458,Gh_A11G1852,Gh_A12G1766,Gh_D06G1621,Gh_A11G2680
GO:1901607	alpha-amino acid biosynthetic process	biological_process	0.12795	0.85287	5	351	367	48611	Gh_D05G2629,Gh_D10G0665,Gh_A04G0975,Gh_D10G0456,Gh_A01G0316
GO:0006030	chitin metabolic process	biological_process	0.1281	0.85287	2	351	86	48611	Gh_A03G1844,Gh_D02G2284
GO:1901071	glucosamine-containing compound metabolic process	biological_process	0.1281	0.85287	2	351	86	48611	Gh_D02G2284,Gh_A03G1844
GO:0004420	hydroxymethylglutaryl-CoA reductase (NADPH) activity	molecular_function	0.12855	0.85287	1	351	19	48611	Gh_A03G1496
GO:0006050	mannosamine metabolic process	biological_process	0.12855	0.85287	1	351	19	48611	Gh_D10G0665
GO:0006051	N-acetylmannosamine metabolic process	biological_process	0.12855	0.85287	1	351	19	48611	Gh_D10G0665
GO:0006231	dTMP biosynthetic process	biological_process	0.12855	0.85287	1	351	19	48611	Gh_A11G1003
GO:0008527	taste receptor activity	molecular_function	0.12855	0.85287	1	351	19	48611	Gh_D07G1489
GO:0009593	detection of chemical stimulus	biological_process	0.12855	0.85287	1	351	19	48611	Gh_D07G1489
GO:0042083	5,10-methylenetetrahydrofolate-dependent methyltransferase activity	molecular_function	0.12855	0.85287	1	351	19	48611	Gh_A11G1003
GO:0046073	dTMP metabolic process	biological_process	0.12855	0.85287	1	351	19	48611	Gh_A11G1003
GO:0047465	N-acylglucosamine-6-phosphate 2-epimerase activity	molecular_function	0.12855	0.85287	1	351	19	48611	Gh_D10G0665
GO:0050906	detection of stimulus involved in sensory perception	biological_process	0.12855	0.85287	1	351	19	48611	Gh_D07G1489
GO:0050907	detection of chemical stimulus involved in sensory perception	biological_process	0.12855	0.85287	1	351	19	48611	Gh_D07G1489
GO:0050912	detection of chemical stimulus involved in sensory perception of taste	biological_process	0.12855	0.85287	1	351	19	48611	Gh_D07G1489
GO:0044423	virion part	cellular_component	0.12883	0.85345	16	351	1619	48611	Gh_D07G1489,Gh_A11G2863,Gh_A11G2680,Gh_A12G1766,Gh_A06G0430,Gh_A11G1852,Gh_A12G0436,Gh_D02G0743,Gh_A04G0109,Gh_D02G1676,Gh_D05G0075,Gh_D11G1068,Gh_A05G1584,Gh_A03G1496,Gh_A11G1097,Gh_D11G2427
GO:0043228	non-membrane-bounded organelle	cellular_component	0.12995	0.85963	27	351	2971	48611	Gh_A04G0147,Gh_A01G0316,Gh_D13G1319,Gh_A01G2143,Gh_A10G1099,Gh_A08G1859,Gh_D12G0568,Gh_A03G1923,Gh_D09G1818,Gh_D11G1612,Gh_D12G2681,Gh_A09G0965,Gh_D11G2427,Gh_A10G2072,Gh_D10G2262,Gh_D12G0062,Gh_D09G1748,Gh_A01G2139,Gh_A11G2680,Gh_A04G1093,Gh_A05G3811,Gh_A05G3330,Gh_A12G0436,Gh_A13G1455,Gh_D07G1596,Gh_A11G1852,Gh_D07G0502
GO:0016854	racemase and epimerase activity	molecular_function	0.13052	0.8621	2	351	87	48611	Gh_D10G0456,Gh_D10G0665
GO:0008948	oxaloacetate decarboxylase activity	molecular_function	0.13295	0.86294	2	351	88	48611	Gh_A11G1852,Gh_D10G2303
GO:0010035	response to inorganic substance	biological_process	0.13295	0.86294	2	351	88	48611	Gh_A08G1529,Gh_A03G0410
GO:0035725	sodium ion transmembrane transport	biological_process	0.13295	0.86294	2	351	88	48611	Gh_D10G2303,Gh_A11G1852
GO:0071436	sodium ion export	biological_process	0.13295	0.86294	2	351	88	48611	Gh_A11G1852,Gh_D10G2303
GO:0022890	inorganic cation transmembrane transporter activity	molecular_function	0.1332	0.86294	22	351	2359	48611	Gh_A01G0725,Gh_D13G2512,Gh_D04G0172,Gh_A03G0410,Gh_A13G1954,Gh_D11G0471,Gh_A04G0147,Gh_A12G1614,Gh_D03G1132,Gh_A04G1093,Gh_A03G0725,Gh_A11G2680,Gh_D13G0101,Gh_A05G3517,Gh_A07G1317,Gh_D10G2262,Gh_A11G0408,Gh_D10G2303,Gh_A11G1852,Gh_Sca004717G07,Gh_A12G0436,Gh_A05G3330
GO:0015077	monovalent inorganic cation transmembrane transporter activity	molecular_function	0.13342	0.86294	17	351	1749	48611	Gh_A01G0725,Gh_D13G2512,Gh_D11G0471,Gh_A13G1954,Gh_A04G0147,Gh_D03G1132,Gh_A04G1093,Gh_A03G0725,Gh_A11G2680,Gh_A07G1317,Gh_D10G2262,Gh_A11G0408,Gh_D10G2303,Gh_A11G1852,Gh_A12G0436,Gh_Sca004717G07,Gh_A05G3330
GO:0030133	transport vesicle	cellular_component	0.13344	0.86294	3	351	175	48611	Gh_D10G1485,Gh_A13G0128,Gh_A08G1529
GO:0006568	tryptophan metabolic process	biological_process	0.13484	0.86294	1	351	20	48611	Gh_D10G0665
GO:0006586	indolalkylamine metabolic process	biological_process	0.13484	0.86294	1	351	20	48611	Gh_D10G0665
GO:0008107	galactoside 2-alpha-L-fucosyltransferase activity	molecular_function	0.13484	0.86294	1	351	20	48611	Gh_A01G0669
GO:0009244	lipopolysaccharide core region biosynthetic process	biological_process	0.13484	0.86294	1	351	20	48611	Gh_D10G2262
GO:0031023	microtubule organizing center organization	biological_process	0.13484	0.86294	1	351	20	48611	Gh_A11G2863
GO:0031127	alpha-(1,2)-fucosyltransferase activity	molecular_function	0.13484	0.86294	1	351	20	48611	Gh_A01G0669
GO:0042430	indole-containing compound metabolic process	biological_process	0.13484	0.86294	1	351	20	48611	Gh_D10G0665
GO:0044456	synapse part	cellular_component	0.13484	0.86294	1	351	20	48611	Gh_A04G1093
GO:0046401	lipopolysaccharide core region metabolic process	biological_process	0.13484	0.86294	1	351	20	48611	Gh_D10G2262
GO:0042803	protein homodimerization activity	molecular_function	0.13496	0.86294	4	351	272	48611	Gh_A11G2680,Gh_D10G2262,Gh_A03G0338,Gh_A05G3330
GO:0030414	peptidase inhibitor activity	molecular_function	0.13508	0.86294	3	351	176	48611	Gh_D12G1399,Gh_D04G0198,Gh_A09G0853
GO:0061134	peptidase regulator activity	molecular_function	0.13508	0.86294	3	351	176	48611	Gh_A09G0853,Gh_D04G0198,Gh_D12G1399
GO:0009116	nucleoside metabolic process	biological_process	0.1352	0.86294	12	351	1157	48611	Gh_A13G1944,Gh_D10G2262,Gh_A03G0725,Gh_A03G1496,Gh_A01G1798,Gh_A11G1852,Gh_Sca004717G07,Gh_A05G3330,Gh_D11G1901,Gh_A12G1684,Gh_D09G1575,Gh_D04G1994
GO:0045786	negative regulation of cell cycle	biological_process	0.13539	0.86294	2	351	89	48611	Gh_A05G3330,Gh_A13G2306
GO:0048278	vesicle docking	biological_process	0.13539	0.86294	2	351	89	48611	Gh_A12G0371,Gh_D07G0502
GO:0008270	zinc ion binding	molecular_function	0.13543	0.86294	36	351	4124	48611	Gh_A05G1584,Gh_D01G0919,Gh_A13G0504,Gh_Sca004981G04,Gh_A08G1529,Gh_A01G0316,Gh_A10G1819,Gh_D05G2907,Gh_D01G0898,Gh_D08G1984,Gh_D10G1893,Gh_A11G2494,Gh_A04G1093,Gh_D08G1817,Gh_D11G2433,Gh_A03G0410,Gh_D12G2354,Gh_A03G1496,Gh_A12G0697,Gh_D08G1394,Gh_D13G0188,Gh_D09G2409,Gh_A10G1919,Gh_A05G3033,Gh_D09G1778,Gh_A11G2680,Gh_D11G1460,Gh_D08G0269,Gh_A05G2774,Gh_D04G0694,Gh_D10G2262,Gh_D05G2565,Gh_D07G0502…
GO:1901657	glycosyl compound metabolic process	biological_process	0.13638	0.86294	12	351	1159	48611	Gh_Sca004717G07,Gh_A05G3330,Gh_A01G1798,Gh_A11G1852,Gh_D09G1575,Gh_A12G1684,Gh_D04G1994,Gh_D11G1901,Gh_D10G2262,Gh_A13G1944,Gh_A03G1496,Gh_A03G0725
GO:0008104	protein localization	biological_process	0.13686	0.86294	22	351	2368	48611	Gh_D10G1485,Gh_D07G0502,Gh_A11G1852,Gh_D13G1425,Gh_A12G1766,Gh_A07G1553,Gh_A04G1093,Gh_D10G2262,Gh_D05G2629,Gh_D11G2427,Gh_A12G0371,Gh_D01G0379,Gh_A02G1349,Gh_D11G1901,Gh_A03G1679,Gh_A12G0234,Gh_D04G0172,Gh_A03G1496,Gh_D02G1676,Gh_D01G0380,Gh_A06G1647,Gh_A08G1529
GO:0006366	transcription from RNA polymerase II promoter	biological_process	0.13769	0.86294	6	351	482	48611	Gh_D01G2280,Gh_A11G2680,Gh_D02G0743,Gh_A08G1954,Gh_A01G0316,Gh_A05G3330
GO:0009036	Type II site-specific deoxyribonuclease activity	molecular_function	0.13784	0.86294	2	351	90	48611	Gh_A07G1309,Gh_A11G1852
GO:0015666	restriction endodeoxyribonuclease activity	molecular_function	0.13784	0.86294	2	351	90	48611	Gh_A07G1309,Gh_A11G1852
GO:0016840	carbon-nitrogen lyase activity	molecular_function	0.13784	0.86294	2	351	90	48611	Gh_A08G1995,Gh_A13G1954
GO:0009896	positive regulation of catabolic process	biological_process	0.13836	0.86294	3	351	178	48611	Gh_A03G1496,Gh_D04G1173,Gh_D10G2262
GO:0010508	positive regulation of autophagy	biological_process	0.13836	0.86294	3	351	178	48611	Gh_D10G2262,Gh_D04G1173,Gh_A03G1496
GO:0031331	positive regulation of cellular catabolic process	biological_process	0.13836	0.86294	3	351	178	48611	Gh_A03G1496,Gh_D04G1173,Gh_D10G2262
GO:0006461	protein complex assembly	biological_process	0.13871	0.86294	8	351	703	48611	Gh_D10G2417,Gh_D02G2420,Gh_D07G0502,Gh_A11G2863,Gh_D10G2262,Gh_A01G1256,Gh_A11G2680,Gh_A03G1496
GO:0009124	nucleoside monophosphate biosynthetic process	biological_process	0.13871	0.86294	8	351	703	48611	Gh_A11G1003,Gh_D10G2262,Gh_A03G0725,Gh_Sca004717G07,Gh_A05G3330,Gh_D13G1425,Gh_A11G1852,Gh_D11G1901
GO:0070271	protein complex biogenesis	biological_process	0.13871	0.86294	8	351	703	48611	Gh_A11G2680,Gh_A03G1496,Gh_A11G2863,Gh_D10G2262,Gh_A01G1256,Gh_D10G2417,Gh_D02G2420,Gh_D07G0502
GO:0005743	mitochondrial inner membrane	cellular_component	0.13949	0.86294	8	351	704	48611	Gh_D03G1132,Gh_A11G1852,Gh_Sca004717G07,Gh_A05G3330,Gh_A04G1093,Gh_A11G2680,Gh_A13G1944,Gh_D10G2262
GO:0015031	protein transport	biological_process	0.13953	0.86294	21	351	2251	48611	Gh_A12G0234,Gh_D11G2427,Gh_D01G0379,Gh_D05G2629,Gh_A12G0371,Gh_A02G1349,Gh_D11G1901,Gh_A03G1679,Gh_A06G1647,Gh_A08G1529,Gh_D04G0172,Gh_A03G1496,Gh_D02G1676,Gh_D01G0380,Gh_A11G1852,Gh_D13G1425,Gh_D07G0502,Gh_D10G1485,Gh_D10G2262,Gh_A07G1553,Gh_A04G1093
GO:1901136	carbohydrate derivative catabolic process	biological_process	0.14002	0.86294	3	351	179	48611	Gh_D02G2284,Gh_D08G0759,Gh_A03G1844
GO:0015948	methanogenesis	biological_process	0.1403	0.86294	2	351	91	48611	Gh_D04G0459,Gh_D04G0746
GO:0015975	energy derivation by oxidation of reduced inorganic compounds	biological_process	0.1403	0.86294	2	351	91	48611	Gh_D04G0746,Gh_D04G0459
GO:0019083	viral transcription	biological_process	0.1403	0.86294	2	351	91	48611	Gh_A11G1852,Gh_A12G0436
GO:0043447	alkane biosynthetic process	biological_process	0.1403	0.86294	2	351	91	48611	Gh_D04G0746,Gh_D04G0459
GO:0016820	hydrolase activity, acting on acid anhydrides, catalyzing transmembrane movement of substances	molecular_function	0.14049	0.86294	7	351	594	48611	Gh_D13G1410,Gh_D11G1901,Gh_A11G2680,Gh_D07G0502,Gh_D04G0172,Gh_A11G1852,Gh_Sca004717G07
GO:0000922	spindle pole	cellular_component	0.14108	0.86294	1	351	21	48611	Gh_A04G0147
GO:0003855	3-dehydroquinate dehydratase activity	molecular_function	0.14108	0.86294	1	351	21	48611	Gh_D10G1122
GO:0005912	adherens junction	cellular_component	0.14108	0.86294	1	351	21	48611	Gh_A03G1496
GO:0005924	cell-substrate adherens junction	cellular_component	0.14108	0.86294	1	351	21	48611	Gh_A03G1496
GO:0005925	focal adhesion	cellular_component	0.14108	0.86294	1	351	21	48611	Gh_A03G1496
GO:0007029	endoplasmic reticulum organization	biological_process	0.14108	0.86294	1	351	21	48611	Gh_A01G0316
GO:0008907	integrase activity	molecular_function	0.14108	0.86294	1	351	21	48611	Gh_D01G0409
GO:0030055	cell-substrate junction	cellular_component	0.14108	0.86294	1	351	21	48611	Gh_A03G1496
GO:0031419	cobalamin binding	molecular_function	0.14108	0.86294	1	351	21	48611	Gh_A11G2680
GO:0036355	2-iminoacetate synthase activity	molecular_function	0.14108	0.86294	1	351	21	48611	Gh_D10G0665
GO:0070161	anchoring junction	cellular_component	0.14108	0.86294	1	351	21	48611	Gh_A03G1496
GO:0031514	motile cilium	cellular_component	0.14168	0.8642	3	351	180	48611	Gh_D07G0502,Gh_A12G0436,Gh_A05G3330
GO:0098519	nucleotide phosphatase activity, acting on free nucleotides	molecular_function	0.14168	0.8642	3	351	180	48611	Gh_D10G2262,Gh_D04G0172,Gh_A03G0786
GO:0044428	nuclear part	cellular_component	0.14218	0.86493	18	351	1889	48611	Gh_D05G2565,Gh_D02G0743,Gh_A05G3330,Gh_A12G0436,Gh_D13G1425,Gh_D09G1748,Gh_A08G1954,Gh_A11G2680,Gh_D01G2280,Gh_A05G2774,Gh_D11G2427,Gh_D01G0379,Gh_A12G1614,Gh_D09G1778,Gh_D13G2389,Gh_D08G1984,Gh_A03G1496,Gh_A01G0316
GO:0016053	organic acid biosynthetic process	biological_process	0.14238	0.86493	9	351	821	48611	Gh_D05G2629,Gh_D08G0759,Gh_A12G1044,Gh_A04G0975,Gh_D04G0694,Gh_D10G0665,Gh_Sca004981G04,Gh_D10G0456,Gh_A01G0316
GO:0046394	carboxylic acid biosynthetic process	biological_process	0.14238	0.86493	9	351	821	48611	Gh_A12G1044,Gh_D04G0694,Gh_A04G0975,Gh_D10G0665,Gh_Sca004981G04,Gh_D10G0456,Gh_A01G0316,Gh_D05G2629,Gh_D08G0759
GO:0019842	vitamin binding	molecular_function	0.14277	0.86613	2	351	92	48611	Gh_A11G2680,Gh_D09G1575
GO:0022836	gated channel activity	molecular_function	0.14298	0.86623	5	351	381	48611	Gh_D04G0746,Gh_D05G0127,Gh_A11G2426,Gh_A11G1852,Gh_A11G1097
GO:0031301	integral component of organelle membrane	cellular_component	0.14403	0.87083	4	351	279	48611	Gh_D10G2262,Gh_A11G2680,Gh_A12G1614,Gh_D02G1676
GO:0044763	single-organism cellular process	biological_process	0.14413	0.87083	114	351	14475	48611	Gh_A08G0612,Gh_D05G2629,Gh_D11G2427,Gh_A12G1684,Gh_D01G0898,Gh_A10G2072,Gh_A05G3224,Gh_D10G0665,Gh_D12G1754,Gh_D10G0456,Gh_A13G1386,Gh_A12G1044,Gh_D12G1820,Gh_D12G2386,Gh_D12G1543,Gh_A11G0408,Gh_A04G1093,Gh_D10G1122,Gh_A12G1073,Gh_A12G0234,Gh_D13G1983,Gh_D04G1994,Gh_A12G1614,Gh_A03G1679,Gh_D03G0476,Gh_D10G0907,Gh_D05G1836,Gh_A12G0091,Gh_D12G2350,Gh_A11G2902,Gh_A01G0669,Gh_D13G0188,Gh_D12G1659,Gh_…
GO:0005488	binding	molecular_function	0.14454	0.87215	225	351	29782	48611	Gh_D05G3816,Gh_D08G0269,Gh_D10G2262,Gh_D12G1468,Gh_D06G0081,Gh_A02G0853,Gh_D10G1401,Gh_A07G1309,Gh_A06G0249,Gh_A12G0436,Gh_A09G1566,Gh_A07G0400,Gh_A12G1580,Gh_A05G3330,Gh_D12G2194,Gh_D07G0502,Gh_A13G2306,Gh_D10G1485,Gh_D06G0087,Gh_D12G1659,Gh_D13G0188,Gh_A11G1755,Gh_D07G1240,Gh_D12G2350,Gh_D01G0380,Gh_A08G2544,Gh_D08G1394,Gh_A10G2071,Gh_A06G0302,Gh_A13G0455,Gh_A12G0234,Gh_D05G1836,Gh_D03G0476,Gh_…
GO:0009061	anaerobic respiration	biological_process	0.14525	0.87462	2	351	93	48611	Gh_D04G0746,Gh_D04G0459
GO:0016830	carbon-carbon lyase activity	molecular_function	0.14535	0.87462	6	351	490	48611	Gh_Sca006756G06,Gh_A04G1093,Gh_D03G0537,Gh_D10G2303,Gh_A11G1852,Gh_D10G0665
GO:0005654	nucleoplasm	cellular_component	0.14653	0.87747	7	351	601	48611	Gh_A01G0316,Gh_D13G2389,Gh_A05G3330,Gh_D01G2280,Gh_A11G2680,Gh_D02G0743,Gh_A08G1954
GO:0044451	nucleoplasm part	cellular_component	0.14653	0.87747	7	351	601	48611	Gh_A05G3330,Gh_D13G2389,Gh_A01G0316,Gh_A08G1954,Gh_D02G0743,Gh_A11G2680,Gh_D01G2280
GO:1901575	organic substance catabolic process	biological_process	0.14659	0.87747	15	351	1534	48611	Gh_D01G2280,Gh_D02G1815,Gh_A01G0931,Gh_A13G1944,Gh_A07G1008,Gh_D10G1605,Gh_D08G0759,Gh_A13G2306,Gh_A03G1844,Gh_A01G1798,Gh_A11G1852,Gh_D10G2619,Gh_A11G1097,Gh_Sca004717G07,Gh_D02G2284
GO:0005283	sodium:amino acid symporter activity	molecular_function	0.14728	0.87747	1	351	22	48611	Gh_A11G1852
GO:0005310	dicarboxylic acid transmembrane transporter activity	molecular_function	0.14728	0.87747	1	351	22	48611	Gh_A11G1852
GO:0005416	cation:amino acid symporter activity	molecular_function	0.14728	0.87747	1	351	22	48611	Gh_A11G1852
GO:0006012	galactose metabolic process	biological_process	0.14728	0.87747	1	351	22	48611	Gh_A11G1852
GO:0009307	DNA restriction-modification system	biological_process	0.14774	0.87747	2	351	94	48611	Gh_A11G1852,Gh_A07G1309
GO:0044355	clearance of foreign intracellular DNA	biological_process	0.14774	0.87747	2	351	94	48611	Gh_A07G1309,Gh_A11G1852
GO:0006913	nucleocytoplasmic transport	biological_process	0.14839	0.87747	3	351	184	48611	Gh_A03G1496,Gh_D01G0379,Gh_D13G1425
GO:0070925	organelle assembly	biological_process	0.14839	0.87747	3	351	184	48611	Gh_A11G2863,Gh_A11G1852,Gh_D10G2262
GO:0043207	response to external biotic stimulus	biological_process	0.14853	0.87747	5	351	386	48611	Gh_A12G1766,Gh_D06G1621,Gh_A11G2680,Gh_Sca004981G04,Gh_A11G1852
GO:0051707	response to other organism	biological_process	0.14853	0.87747	5	351	386	48611	Gh_A11G2680,Gh_D06G1621,Gh_A12G1766,Gh_A11G1852,Gh_Sca004981G04
GO:0051726	regulation of cell cycle	biological_process	0.15008	0.87747	3	351	185	48611	Gh_A13G2306,Gh_A05G3330,Gh_D13G0188
GO:0046914	transition metal ion binding	molecular_function	0.15014	0.87747	47	351	5590	48611	Gh_A04G1093,Gh_D08G1817,Gh_D11G2433,Gh_D03G0537,Gh_D01G0919,Gh_A05G1584,Gh_A13G0504,Gh_Sca004981G04,Gh_A03G1352,Gh_A01G0316,Gh_A08G1529,Gh_A04G0398,Gh_D01G0898,Gh_D05G2907,Gh_A10G1819,Gh_A11G2494,Gh_D11G1279,Gh_D08G1984,Gh_D10G1893,Gh_A08G2364,Gh_D11G1460,Gh_D12G1468,Gh_A11G2680,Gh_D04G0694,Gh_D10G2262,Gh_D08G0269,Gh_A05G2774,Gh_D06G0087,Gh_D07G0502,Gh_D05G2565,Gh_D12G2194,Gh_A12G0436,Gh_A12G1580…
GO:0005184	neuropeptide hormone activity	molecular_function	0.15023	0.87747	2	351	95	48611	Gh_A03G1496,Gh_A11G1852
GO:0043161	proteasome-mediated ubiquitin-dependent protein catabolic process	biological_process	0.15023	0.87747	2	351	95	48611	Gh_A11G1852,Gh_A13G2306
GO:0051128	regulation of cellular component organization	biological_process	0.15065	0.87747	4	351	284	48611	Gh_A11G2680,Gh_D05G2629,Gh_A13G2306,Gh_D13G0188
GO:0022892	substrate-specific transporter activity	molecular_function	0.15133	0.87747	30	351	3408	48611	Gh_D10G2303,Gh_A11G0408,Gh_A12G0436,Gh_Sca004717G07,Gh_A05G3330,Gh_A11G2426,Gh_A11G1852,Gh_D13G0101,Gh_A05G3517,Gh_D03G0971,Gh_A10G2021,Gh_A03G0725,Gh_A04G1093,Gh_A11G2680,Gh_D05G0127,Gh_D10G2262,Gh_A07G1317,Gh_D11G2427,Gh_D03G1132,Gh_A12G1614,Gh_A11G1097,Gh_A03G1923,Gh_D04G0172,Gh_D13G2512,Gh_A03G0410,Gh_A01G0725,Gh_D04G0746,Gh_D11G0471,Gh_A13G1954,Gh_A04G0147
GO:0006119	oxidative phosphorylation	biological_process	0.15178	0.87747	3	351	186	48611	Gh_D09G1575,Gh_A12G1684,Gh_A13G1944
GO:0042773	ATP synthesis coupled electron transport	biological_process	0.15178	0.87747	3	351	186	48611	Gh_A12G1684,Gh_D09G1575,Gh_A13G1944
GO:0051301	cell division	biological_process	0.1522	0.87747	6	351	497	48611	Gh_D01G0409,Gh_D13G0188,Gh_D07G0502,Gh_A13G2306,Gh_D10G1485,Gh_D04G0172
GO:0010564	regulation of cell cycle process	biological_process	0.15274	0.87747	2	351	96	48611	Gh_D13G0188,Gh_A13G2306
GO:0051052	regulation of DNA metabolic process	biological_process	0.15274	0.87747	2	351	96	48611	Gh_A11G1852,Gh_D09G2200
GO:0008652	cellular amino acid biosynthetic process	biological_process	0.15319	0.87747	6	351	498	48611	Gh_D10G0456,Gh_A01G0316,Gh_D10G0665,Gh_A04G0975,Gh_D08G0759,Gh_D05G2629
GO:0004379	glycylpeptide N-tetradecanoyltransferase activity	molecular_function	0.15344	0.87747	1	351	23	48611	Gh_D07G2317
GO:0015097	mercury ion transmembrane transporter activity	molecular_function	0.15344	0.87747	1	351	23	48611	Gh_A03G0410
GO:0015694	mercury ion transport	biological_process	0.15344	0.87747	1	351	23	48611	Gh_A03G0410
GO:0019107	myristoyltransferase activity	molecular_function	0.15344	0.87747	1	351	23	48611	Gh_D07G2317
GO:0019904	protein domain specific binding	molecular_function	0.15344	0.87747	1	351	23	48611	Gh_A07G0938
GO:0032465	regulation of cytokinesis	biological_process	0.15344	0.87747	1	351	23	48611	Gh_D13G0188
GO:0046689	response to mercury ion	biological_process	0.15344	0.87747	1	351	23	48611	Gh_A03G0410
GO:0050787	detoxification of mercury ion	biological_process	0.15344	0.87747	1	351	23	48611	Gh_A03G0410
GO:0061687	detoxification of inorganic compound	biological_process	0.15344	0.87747	1	351	23	48611	Gh_A03G0410
GO:0098754	detoxification	biological_process	0.15344	0.87747	1	351	23	48611	Gh_A03G0410
GO:1990267	response to transition metal nanoparticle	biological_process	0.15344	0.87747	1	351	23	48611	Gh_A03G0410
GO:0004129	cytochrome-c oxidase activity	molecular_function	0.15348	0.87747	3	351	187	48611	Gh_A04G1093,Gh_A01G0725,Gh_D03G1132
GO:0016675	oxidoreductase activity, acting on a heme group of donors	molecular_function	0.15348	0.87747	3	351	187	48611	Gh_A01G0725,Gh_A04G1093,Gh_D03G1132
GO:0016676	oxidoreductase activity, acting on a heme group of donors, oxygen as acceptor	molecular_function	0.15348	0.87747	3	351	187	48611	Gh_A04G1093,Gh_A01G0725,Gh_D03G1132
GO:0044767	single-organism developmental process	biological_process	0.15423	0.88061	9	351	837	48611	Gh_A05G3033,Gh_A11G1852,Gh_A12G0436,Gh_D02G1676,Gh_D01G2280,Gh_A06G1500,Gh_D10G0456,Gh_D12G1754,Gh_A01G0073
GO:0006996	organelle organization	biological_process	0.15473	0.88233	18	351	1915	48611	Gh_D11G2427,Gh_A06G1633,Gh_D11G0471,Gh_A01G0316,Gh_A04G0147,Gh_A12G0253,Gh_A12G0436,Gh_A13G1455,Gh_A05G3330,Gh_A11G1852,Gh_A11G0261,Gh_A13G2306,Gh_D10G2417,Gh_A11G0408,Gh_D10G2262,Gh_A11G2863,Gh_A12G1766,Gh_A11G2680
GO:0015947	methane metabolic process	biological_process	0.15525	0.88305	2	351	97	48611	Gh_D04G0459,Gh_D04G0746
GO:0043446	cellular alkane metabolic process	biological_process	0.15525	0.88305	2	351	97	48611	Gh_D04G0459,Gh_D04G0746
GO:0009165	nucleotide biosynthetic process	biological_process	0.15727	0.89048	9	351	841	48611	Gh_A11G1003,Gh_D10G2262,Gh_A03G0725,Gh_D13G1425,Gh_A11G1852,Gh_Sca004717G07,Gh_A05G3330,Gh_D12G2194,Gh_D11G1901
GO:0010498	proteasomal protein catabolic process	biological_process	0.15777	0.89048	2	351	98	48611	Gh_A13G2306,Gh_A11G1852
GO:0042302	structural constituent of cuticle	molecular_function	0.15777	0.89048	2	351	98	48611	Gh_D01G0380,Gh_D10G2262
GO:0005885	Arp2/3 protein complex	cellular_component	0.15955	0.89048	1	351	24	48611	Gh_A11G2680
GO:0007224	smoothened signaling pathway	biological_process	0.15955	0.89048	1	351	24	48611	Gh_A12G1766
GO:0010638	positive regulation of organelle organization	biological_process	0.15955	0.89048	1	351	24	48611	Gh_A11G2680
GO:0017150	tRNA dihydrouridine synthase activity	molecular_function	0.15955	0.89048	1	351	24	48611	Gh_D10G0665
GO:0030838	positive regulation of actin filament polymerization	biological_process	0.15955	0.89048	1	351	24	48611	Gh_A11G2680
GO:0031334	positive regulation of protein complex assembly	biological_process	0.15955	0.89048	1	351	24	48611	Gh_A11G2680
GO:0032273	positive regulation of protein polymerization	biological_process	0.15955	0.89048	1	351	24	48611	Gh_A11G2680
GO:0034314	Arp2/3 complex-mediated actin nucleation	biological_process	0.15955	0.89048	1	351	24	48611	Gh_A11G2680
GO:0034464	BBSome	cellular_component	0.15955	0.89048	1	351	24	48611	Gh_A11G1852
GO:0044089	positive regulation of cellular component biogenesis	biological_process	0.15955	0.89048	1	351	24	48611	Gh_A11G2680
GO:0045010	actin nucleation	biological_process	0.15955	0.89048	1	351	24	48611	Gh_A11G2680
GO:0051495	positive regulation of cytoskeleton organization	biological_process	0.15955	0.89048	1	351	24	48611	Gh_A11G2680
GO:0051302	regulation of cell division	biological_process	0.1603	0.89355	2	351	99	48611	Gh_A13G2306,Gh_D13G0188
GO:0000793	condensed chromosome	cellular_component	0.1621	0.89982	3	351	192	48611	Gh_A12G0436,Gh_D09G1748,Gh_D11G2427
GO:0005929	cilium	cellular_component	0.1621	0.89982	3	351	192	48611	Gh_A12G0436,Gh_A05G3330,Gh_D07G0502
GO:0045184	establishment of protein localization	biological_process	0.16271	0.89982	21	351	2303	48611	Gh_D10G1485,Gh_D07G0502,Gh_D13G1425,Gh_A11G1852,Gh_A07G1553,Gh_A04G1093,Gh_D10G2262,Gh_D11G1901,Gh_A03G1679,Gh_D11G2427,Gh_D05G2629,Gh_D01G0379,Gh_A12G0371,Gh_A02G1349,Gh_A12G0234,Gh_D02G1676,Gh_D01G0380,Gh_D04G0172,Gh_A03G1496,Gh_A08G1529,Gh_A06G1647
GO:0034613	cellular protein localization	biological_process	0.16275	0.89982	18	351	1931	48611	Gh_D11G1901,Gh_A03G1679,Gh_D01G0379,Gh_D05G2629,Gh_A02G1349,Gh_A12G0234,Gh_D02G1676,Gh_A03G1496,Gh_D04G0172,Gh_A08G1529,Gh_A06G1647,Gh_D10G1485,Gh_D13G1425,Gh_A11G1852,Gh_A07G1553,Gh_A04G1093,Gh_A12G1766,Gh_D10G2262
GO:0070727	cellular macromolecule localization	biological_process	0.16275	0.89982	18	351	1931	48611	Gh_D10G1485,Gh_D13G1425,Gh_A11G1852,Gh_A12G1766,Gh_A07G1553,Gh_A04G1093,Gh_D10G2262,Gh_D05G2629,Gh_A02G1349,Gh_D01G0379,Gh_D11G1901,Gh_A03G1679,Gh_A12G0234,Gh_D04G0172,Gh_A03G1496,Gh_D02G1676,Gh_A06G1647,Gh_A08G1529
GO:0006886	intracellular protein transport	biological_process	0.16279	0.89982	17	351	1808	48611	Gh_A06G1647,Gh_A08G1529,Gh_D04G0172,Gh_A03G1496,Gh_D02G1676,Gh_A12G0234,Gh_D05G2629,Gh_A02G1349,Gh_D01G0379,Gh_D11G1901,Gh_A03G1679,Gh_D10G2262,Gh_A04G1093,Gh_A07G1553,Gh_A11G1852,Gh_D13G1425,Gh_D10G1485
GO:0008831	dTDP-4-dehydrorhamnose reductase activity	molecular_function	0.16283	0.89982	2	351	100	48611	Gh_A05G3413,Gh_D05G2629
GO:0003677	DNA binding	molecular_function	0.16327	0.9005	53	351	6419	48611	Gh_A06G0430,Gh_A05G3517,Gh_D02G0743,Gh_D12G1758,Gh_D11G2433,Gh_A05G0618,Gh_D03G1234,Gh_D01G0919,Gh_A12G1650,Gh_A05G3267,Gh_A12G1509,Gh_D12G1399,Gh_A01G0316,Gh_D12G1747,Gh_A10G2072,Gh_A05G3224,Gh_D12G2617,Gh_D01G0409,Gh_D09G2200,Gh_D13G2389,Gh_A08G0612,Gh_D10G1893,Gh_D12G0062,Gh_A10G2021,Gh_A11G0485,Gh_A09G1177,Gh_A08G2548,Gh_A11G2680,Gh_D04G0694,Gh_A01G0073,Gh_D10G1485,Gh_A13G0128,Gh_A11G0261,Gh_…
GO:0031325	positive regulation of cellular metabolic process	biological_process	0.16336	0.9005	5	351	399	48611	Gh_D10G2262,Gh_D04G1173,Gh_A11G1852,Gh_A03G1496,Gh_D02G1676
GO:0015995	chlorophyll biosynthetic process	biological_process	0.16423	0.90308	4	351	294	48611	Gh_D10G2262,Gh_A05G3330,Gh_D01G0898,Gh_D04G0172
GO:0031300	intrinsic component of organelle membrane	cellular_component	0.16423	0.90308	4	351	294	48611	Gh_D02G1676,Gh_A11G2680,Gh_A12G1614,Gh_D10G2262
GO:1901293	nucleoside phosphate biosynthetic process	biological_process	0.16499	0.9061	9	351	851	48611	Gh_A03G0725,Gh_D10G2262,Gh_A11G1003,Gh_D11G1901,Gh_A11G1852,Gh_D13G1425,Gh_A05G3330,Gh_D12G2194,Gh_Sca004717G07
GO:0004484	mRNA guanylyltransferase activity	molecular_function	0.16562	0.90622	1	351	25	48611	Gh_A06G0430
GO:0006013	mannose metabolic process	biological_process	0.16562	0.90622	1	351	25	48611	Gh_A09G0006
GO:0042765	GPI-anchor transamidase complex	cellular_component	0.16562	0.90622	1	351	25	48611	Gh_A11G2680
GO:0032991	macromolecular complex	cellular_component	0.16686	0.91191	62	351	7617	48611	Gh_D12G2235,Gh_D13G1425,Gh_D02G2420,Gh_D02G0743,Gh_D02G0057,Gh_A08G1954,Gh_D09G1748,Gh_D05G1911,Gh_A04G1093,Gh_D05G0127,Gh_D01G2280,Gh_A03G1923,Gh_D09G1818,Gh_Sca006756G05,Gh_A08G0612,Gh_D12G2681,Gh_D11G1612,Gh_D13G2389,Gh_D08G1984,Gh_A12G0371,Gh_D11G2427,Gh_A10G2072,Gh_D11G1901,Gh_A05G3224,Gh_A08G1529,Gh_A01G0316,Gh_A04G0147,Gh_A01G2143,Gh_A01G0725,Gh_A01G0931,Gh_A11G3090,Gh_Sca004717G07,Gh_A12G…
GO:0006298	mismatch repair	biological_process	0.16793	0.91662	2	351	102	48611	Gh_A12G1073,Gh_A05G3330
GO:0098588	bounding membrane of organelle	cellular_component	0.16914	0.9221	11	351	1092	48611	Gh_D10G1485,Gh_A10G2072,Gh_A11G1852,Gh_A12G1580,Gh_A11G2680,Gh_A04G1093,Gh_D02G1676,Gh_A01G0725,Gh_A01G0316,Gh_A08G1529,Gh_D10G2262
GO:0044444	cytoplasmic part	cellular_component	0.17146	0.92556	41	351	4879	48611	Gh_D05G2629,Gh_A12G0371,Gh_A10G2072,Gh_A05G3224,Gh_A03G1923,Gh_D09G1818,Gh_D11G1612,Gh_D12G2681,Gh_A01G2143,Gh_A12G1650,Gh_A01G0725,Gh_A04G0147,Gh_A08G1529,Gh_A01G0316,Gh_D12G2235,Gh_D13G1425,Gh_D09G1748,Gh_A04G1093,Gh_D03G1132,Gh_A09G0965,Gh_D12G0568,Gh_D07G1260,Gh_A10G1099,Gh_A08G1859,Gh_D02G1676,Gh_D11G0471,Gh_D13G1319,Gh_D10G1485,Gh_A13G0128,Gh_D07G0502,Gh_A05G3330,Gh_A12G1580,Gh_Sca004717G07…
GO:0000015	phosphopyruvate hydratase complex	cellular_component	0.17164	0.92556	1	351	26	48611	Gh_Sca004717G07
[truncated: 1,104 more rows]
