# Supplementary material for: Integrated Methylome and Transcriptome Analysis between the CMS-D2 Line ZBA and Its Maintainer Line ZB in Upland Cotton
Source: Int J Mol Sci. 2019 Dec 2;20(23):6070. doi: 10.3390/ijms20236070 (PMC6928835; doi:10.3390/ijms20236070)
Supplement: Supplementary file 1 [file ijms-20-06070-s001.zip › Table S3. KEGG pathway enrichment analysis of hyper- or hypomethylated DEGs in ZB versus ZBA.xlsx]

## Sheet: Hyper
#Term	Database	ID	Input number	Background number	P-Value	Corrected P-Value	Input	Hyperlink
Photosynthesis	KEGG PATHWAY	ath00195	10	77	4.19187e-06	0.000276664	Gh_Sca010487G03|Gh_Sca010487G02|Gh_D08G1218|Gh_A03G0725|Gh_Sca007035G04|Gh_Sca006756G05|Gh_Sca005787G06|Gh_Sca007622G02|Gh_Sca005362G04|Gh_Sca005362G03	http://www.genome.jp/kegg-bin/show_pathway?ath00195/ath:ArthCp029%09red/ath:ArthCp021%09red/ath:ArthCp035%09red/ath:ArthCp002%09red/ath:ArthCp010%09red/ath:ArthCp054%09red/ath:ArthCp018%09red
Oxidative phosphorylation	KEGG PATHWAY	ath00190	11	162	0.000352423	0.01163	Gh_Sca010487G03|Gh_D04G1994|Gh_A10G0789|Gh_D04G0898|Gh_Sca005646G04|Gh_A05G0978|Gh_A03G0734|Gh_D11G3194|Gh_A03G0725|Gh_Sca006566G05|Gh_Sca010487G02	http://www.genome.jp/kegg-bin/show_pathway?ath00190/ath:ArthCp029%09red/ath:ArthMp100%09red/ath:AT1G78900%09red/ath:ArthCp025%09red/ath:ArthCp026%09red/ath:ArthCp010%09red/ath:ArthCp079%09red/ath:ArthMp043%09red/ath:ArthCp071%09red
Metabolic pathways	KEGG PATHWAY	ath01100	46	1861	0.0287104	0.57541	Gh_D13G1470|Gh_Sca010487G03|Gh_Sca010487G02|Gh_D04G0469|Gh_D06G0902|Gh_D07G0510|Gh_A13G1968|Gh_D13G2069|Gh_A05G2246|Gh_D07G1807|Gh_D08G1218|Gh_A10G0789|Gh_A01G2111|Gh_Sca007035G04|Gh_A03G0725|Gh_A07G1603|Gh_A07G0166|Gh_Sca006566G05|Gh_Sca005362G03|Gh_D02G1219|Gh_D08G0270|Gh_Sca006756G05|Gh_A03G0149|Gh_Sca006756G06|Gh_A03G2022|Gh_A03G1334|Gh_D04G0898|Gh_D05G1075|Gh_D11G3194|Gh_Sca005362G04|Gh_A03G…	http://www.genome.jp/kegg-bin/show_pathway?ath01100/ath:ArthMp100%09red/ath:AT1G10070%09red/ath:AT3G26320%09red/ath:AT5G50850%09red/ath:ArthCp035%09red/ath:ArthCp030%09red/ath:AT4G16760%09red/ath:ArthCp010%09red/ath:ArthCp079%09red/ath:ArthCp012%09red/ath:AT1G73050%09red/ath:ArthCp014%09red/ath:AT4G11820%09red/ath:ArthCp018%09red/ath:ArthCp054%09red/ath:ArthCp071%09red/ath:AT1G78900%09red/ath:AT4…
Glyoxylate and dicarboxylate metabolism	KEGG PATHWAY	ath00630	4	63	0.0348733	0.57541	Gh_Sca011694G01|Gh_A01G2111|Gh_D07G1807|Gh_Sca006756G06	http://www.genome.jp/kegg-bin/show_pathway?ath00630/ath:ArthCp030%09red
Carbon fixation in photosynthetic organisms	KEGG PATHWAY	ath00710	4	69	0.045539	0.601114	Gh_Sca011694G01|Gh_A01G2111|Gh_D07G1807|Gh_Sca006756G06	http://www.genome.jp/kegg-bin/show_pathway?ath00710/ath:ArthCp030%09red
Galactose metabolism	KEGG PATHWAY	ath00052	3	55	0.0911975	0.875692	Gh_D06G0902|Gh_D02G1219|Gh_A09G0281	http://www.genome.jp/kegg-bin/show_pathway?ath00052/ath:AT3G17940%09red/ath:AT5G40390%09red/ath:AT3G13790%09red
Carbon metabolism	KEGG PATHWAY	ath01200	8	243	0.0928764	0.875692	Gh_D07G1807|Gh_Sca006756G06|Gh_A03G1334|Gh_A01G2111|Gh_Sca011694G01|Gh_A07G1603|Gh_A08G0871|Gh_D13G2069	http://www.genome.jp/kegg-bin/show_pathway?ath01200/ath:AT5G50850%09red/ath:AT3G02360%09red/ath:AT5G52920%09red/ath:AT5G56760%09red/ath:ArthCp030%09red
Linoleic acid metabolism	KEGG PATHWAY	ath00591	1	9	0.169817	0.898653	Gh_A09G2247	http://www.genome.jp/kegg-bin/show_pathway?ath00591/ath:AT3G22400%09red
Thiamine metabolism	KEGG PATHWAY	ath00730	1	11	0.200167	0.898653	Gh_D08G0270	http://www.genome.jp/kegg-bin/show_pathway?ath00730/ath:AT4G15560%09red
Peroxisome	KEGG PATHWAY	ath04146	3	81	0.201779	0.898653	Gh_A08G0670|Gh_A13G1324|Gh_A07G1965	http://www.genome.jp/kegg-bin/show_pathway?ath04146/ath:AT5G43280%09red/ath:AT4G16760%09red/ath:AT1G03000%09red
RNA polymerase	KEGG PATHWAY	ath03020	2	45	0.214604	0.898653	Gh_D02G1093|Gh_A03G0149	http://www.genome.jp/kegg-bin/show_pathway?ath03020/ath:ArthCp012%09red/ath:ArthCp014%09red
Valine, leucine and isoleucine degradation	KEGG PATHWAY	ath00280	2	45	0.214604	0.898653	Gh_A03G2022|Gh_A05G2255	http://www.genome.jp/kegg-bin/show_pathway?ath00280/ath:AT4G11820%09red/ath:AT1G10070%09red
Ribosome	KEGG PATHWAY	ath03010	9	360	0.241163	0.898653	Gh_D08G0567|Gh_A05G2374|Gh_D02G1619|Gh_D08G1212|Gh_D02G0877|Gh_A05G0713|Gh_A01G1126|Gh_D11G3196|Gh_A05G2854	http://www.genome.jp/kegg-bin/show_pathway?ath03010/ath:AT5G03850%09red/ath:ArthCp056%09red/ath:AT1G26910%09red/ath:AT1G70600%09red/ath:ArthCp020%09red/ath:ArthCp058%09red/ath:ArthCp081%09red/ath:ArthCp043%09red
Nicotinate and nicotinamide metabolism	KEGG PATHWAY	ath00760	1	14	0.243635	0.898653	Gh_D05G0705	http://www.genome.jp/kegg-bin/show_pathway?ath00760/ath:AT3G21070%09red
Taurine and hypotaurine metabolism	KEGG PATHWAY	ath00430	1	14	0.243635	0.898653	Gh_D04G0469	http://www.genome.jp/kegg-bin/show_pathway?ath00430/ath:AT5G39890%09red
Butanoate metabolism	KEGG PATHWAY	ath00650	1	17	0.284752	0.898653	Gh_A03G2022	http://www.genome.jp/kegg-bin/show_pathway?ath00650/ath:AT4G11820%09red
Terpenoid backbone biosynthesis	KEGG PATHWAY	ath00900	2	58	0.303559	0.898653	Gh_A03G2022|Gh_D08G0270	http://www.genome.jp/kegg-bin/show_pathway?ath00900/ath:AT4G11820%09red/ath:AT4G15560%09red
Glucosinolate biosynthesis	KEGG PATHWAY	ath00966	1	19	0.310919	0.898653	Gh_A05G2255	http://www.genome.jp/kegg-bin/show_pathway?ath00966/ath:AT1G10070%09red
Flavonoid biosynthesis	KEGG PATHWAY	ath00941	1	21	0.336135	0.898653	Gh_D06G0041	http://www.genome.jp/kegg-bin/show_pathway?ath00941/ath:AT5G42800%09red
Limonene and pinene degradation	KEGG PATHWAY	ath00903	2	63	0.337517	0.898653	Gh_D12G1468|Gh_A05G2246	http://www.genome.jp/kegg-bin/show_pathway?ath00903/ath:AT3G26320%09red/ath:AT4G37370%09red
Stilbenoid, diarylheptanoid and gingerol biosynthesis	KEGG PATHWAY	ath00945	2	64	0.344254	0.898653	Gh_D12G1468|Gh_A05G2246	http://www.genome.jp/kegg-bin/show_pathway?ath00945/ath:AT3G26320%09red/ath:AT4G37370%09red
Purine metabolism	KEGG PATHWAY	ath00230	4	157	0.345295	0.898653	Gh_D13G1470|Gh_A08G0871|Gh_D02G1093|Gh_A03G0149	http://www.genome.jp/kegg-bin/show_pathway?ath00230/ath:ArthCp012%09red/ath:AT5G52920%09red/ath:ArthCp014%09red/ath:AT5G63960%09red
Glycolysis / Gluconeogenesis	KEGG PATHWAY	ath00010	3	112	0.356091	0.898653	Gh_D02G1219|Gh_A08G0871|Gh_A03G1334	http://www.genome.jp/kegg-bin/show_pathway?ath00010/ath:AT3G17940%09red/ath:AT5G50850%09red/ath:AT5G52920%09red
Valine, leucine and isoleucine biosynthesis	KEGG PATHWAY	ath00290	1	23	0.360432	0.898653	Gh_A05G2255	http://www.genome.jp/kegg-bin/show_pathway?ath00290/ath:AT1G10070%09red
ABC transporters	KEGG PATHWAY	ath02010	1	24	0.372246	0.898653	Gh_D04G0583	http://www.genome.jp/kegg-bin/show_pathway?ath02010/ath:AT3G55320%09red
Pyrimidine metabolism	KEGG PATHWAY	ath00240	3	116	0.37623	0.898653	Gh_D13G1470|Gh_D02G1093|Gh_A03G0149	http://www.genome.jp/kegg-bin/show_pathway?ath00240/ath:ArthCp012%09red/ath:ArthCp014%09red/ath:AT5G63960%09red
Nucleotide excision repair	KEGG PATHWAY	ath03420	2	69	0.377581	0.898653	Gh_D13G0686|Gh_D13G1470	http://www.genome.jp/kegg-bin/show_pathway?ath03420/ath:AT1G79650%09red/ath:AT5G63960%09red
Endocytosis	KEGG PATHWAY	ath04144	3	117	0.381247	0.898653	Gh_D13G1518|Gh_A12G1892|Gh_D05G2734	http://www.genome.jp/kegg-bin/show_pathway?ath04144/ath:AT5G54310%09red/ath:AT3G10640%09red/ath:AT5G46750%09red
Ether lipid metabolism	KEGG PATHWAY	ath00565	1	26	0.395228	0.898844	Gh_D07G0510	http://www.genome.jp/kegg-bin/show_pathway?ath00565/ath:AT3G48610%09red
Pantothenate and CoA biosynthesis	KEGG PATHWAY	ath00770	1	28	0.417373	0.898844	Gh_A05G2255	http://www.genome.jp/kegg-bin/show_pathway?ath00770/ath:AT1G10070%09red
Ubiquinone and other terpenoid-quinone biosynthesis	KEGG PATHWAY	ath00130	1	32	0.459271	0.898844	Gh_A07G0166	http://www.genome.jp/kegg-bin/show_pathway?ath00130/ath:AT4G32770%09red
Pyruvate metabolism	KEGG PATHWAY	ath00620	2	83	0.466678	0.898844	Gh_A08G0871|Gh_A03G1334	http://www.genome.jp/kegg-bin/show_pathway?ath00620/ath:AT5G50850%09red/ath:AT5G52920%09red
alpha-Linolenic acid metabolism	KEGG PATHWAY	ath00592	1	33	0.469268	0.898844	Gh_A07G1965	http://www.genome.jp/kegg-bin/show_pathway?ath00592/ath:AT4G16760%09red
Tropane, piperidine and pyridine alkaloid biosynthesis	KEGG PATHWAY	ath00960	1	36	0.49817	0.898844	Gh_A13G1968	http://www.genome.jp/kegg-bin/show_pathway?ath00960/ath:AT2G29290%09red
Biosynthesis of unsaturated fatty acids	KEGG PATHWAY	ath01040	1	36	0.49817	0.898844	Gh_A07G1965	http://www.genome.jp/kegg-bin/show_pathway?ath01040/ath:AT4G16760%09red
Mismatch repair	KEGG PATHWAY	ath03430	1	39	0.525506	0.898844	Gh_D13G1470	http://www.genome.jp/kegg-bin/show_pathway?ath03430/ath:AT5G63960%09red
Glutathione metabolism	KEGG PATHWAY	ath00480	2	93	0.525547	0.898844	Gh_D10G1453|Gh_A07G1603	http://www.genome.jp/kegg-bin/show_pathway?ath00480/ath:AT3G02360%09red/ath:AT2G29420%09red
Fatty acid degradation	KEGG PATHWAY	ath00071	1	40	0.534285	0.898844	Gh_A07G1965	http://www.genome.jp/kegg-bin/show_pathway?ath00071/ath:AT4G16760%09red
Sulfur metabolism	KEGG PATHWAY	ath00920	1	41	0.542902	0.898844	Gh_D13G2069	http://www.genome.jp/kegg-bin/show_pathway?ath00920/ath:AT5G56760%09red
Nitrogen metabolism	KEGG PATHWAY	ath00910	1	42	0.55136	0.898844	Gh_D12G2422	http://www.genome.jp/kegg-bin/show_pathway?ath00910/ath:AT5G53460%09red
Base excision repair	KEGG PATHWAY	ath03410	1	43	0.559663	0.898844	Gh_D13G1470	http://www.genome.jp/kegg-bin/show_pathway?ath03410/ath:AT5G63960%09red
Alanine, aspartate and glutamate metabolism	KEGG PATHWAY	ath00250	1	48	0.598938	0.898844	Gh_D12G2422	http://www.genome.jp/kegg-bin/show_pathway?ath00250/ath:AT5G53460%09red
DNA replication	KEGG PATHWAY	ath03030	1	50	0.613654	0.898844	Gh_D13G1470	http://www.genome.jp/kegg-bin/show_pathway?ath03030/ath:AT5G63960%09red
RNA degradation	KEGG PATHWAY	ath03018	2	111	0.620026	0.898844	Gh_D07G0810|Gh_D11G3258	http://www.genome.jp/kegg-bin/show_pathway?ath03018/ath:AT2G36660%09red/ath:AT3G22270%09red
Pentose phosphate pathway	KEGG PATHWAY	ath00030	1	54	0.641493	0.898844	Gh_A07G1603	http://www.genome.jp/kegg-bin/show_pathway?ath00030/ath:AT3G02360%09red
Homologous recombination	KEGG PATHWAY	ath03440	1	56	0.654655	0.898844	Gh_D13G1470	http://www.genome.jp/kegg-bin/show_pathway?ath03440/ath:AT5G63960%09red
Amino sugar and nucleotide sugar metabolism	KEGG PATHWAY	ath00520	2	122	0.670303	0.898844	Gh_A09G2323|Gh_A01G0311	http://www.genome.jp/kegg-bin/show_pathway?ath00520/ath:AT1G78570%09red/ath:AT3G54420%09red
Cyanoamino acid metabolism	KEGG PATHWAY	ath00460	1	60	0.679554	0.898844	Gh_D05G1075	http://www.genome.jp/kegg-bin/show_pathway?ath00460/ath:AT1G73050%09red
Citrate cycle (TCA cycle)	KEGG PATHWAY	ath00020	1	62	0.691325	0.898844	Gh_A03G1334	http://www.genome.jp/kegg-bin/show_pathway?ath00020/ath:AT5G50850%09red
Biosynthesis of secondary metabolites	KEGG PATHWAY	ath01110	17	995	0.693334	0.898844	Gh_A09G2323|Gh_D02G1219|Gh_A05G2255|Gh_A07G0166|Gh_A03G2022|Gh_D12G1468|Gh_A03G1334|Gh_A05G2246|Gh_D06G0041|Gh_D05G1075|Gh_A13G1968|Gh_A07G1603|Gh_D12G2422|Gh_D08G0270|Gh_A08G0871|Gh_D10G1880|Gh_A01G0311	http://www.genome.jp/kegg-bin/show_pathway?ath01110/ath:AT3G17940%09red/ath:AT5G53460%09red/ath:AT1G10070%09red/ath:AT3G26320%09red/ath:AT5G50850%09red/ath:AT4G15560%09red/ath:AT1G73050%09red/ath:AT1G78570%09red/ath:AT3G02360%09red/ath:AT5G52920%09red/ath:AT4G32770%09red/ath:AT3G54420%09red/ath:AT5G42800%09red/ath:AT2G29290%09red/ath:AT4G37370%09red/ath:AT4G11820%09red/ath:AT5G05340%09red
Biosynthesis of amino acids	KEGG PATHWAY	ath01230	4	255	0.707631	0.898844	Gh_A05G2255|Gh_A08G0871|Gh_D12G2422|Gh_D13G2069	http://www.genome.jp/kegg-bin/show_pathway?ath01230/ath:AT5G52920%09red/ath:AT5G53460%09red/ath:AT5G56760%09red/ath:AT1G10070%09red
Inositol phosphate metabolism	KEGG PATHWAY	ath00562	1	65	0.70818	0.898844	Gh_D07G0510	http://www.genome.jp/kegg-bin/show_pathway?ath00562/ath:AT3G48610%09red
Fatty acid metabolism	KEGG PATHWAY	ath01212	1	73	0.748782	0.920878	Gh_A07G1965	http://www.genome.jp/kegg-bin/show_pathway?ath01212/ath:AT4G16760%09red
2-Oxocarboxylic acid metabolism	KEGG PATHWAY	ath01210	1	74	0.753445	0.920878	Gh_A05G2255	http://www.genome.jp/kegg-bin/show_pathway?ath01210/ath:AT1G10070%09red
Glycerophospholipid metabolism	KEGG PATHWAY	ath00564	1	83	0.791719	0.943252	Gh_D07G0510	http://www.genome.jp/kegg-bin/show_pathway?ath00564/ath:AT3G48610%09red
Phagosome	KEGG PATHWAY	ath04145	1	86	0.803115	0.943252	Gh_A05G0978	http://www.genome.jp/kegg-bin/show_pathway?ath04145/ath:AT1G78900%09red
Plant-pathogen interaction	KEGG PATHWAY	ath04626	2	164	0.814627	0.943252	Gh_D10G0130|Gh_D12G1932	http://www.genome.jp/kegg-bin/show_pathway?ath04626/ath:AT4G04720%09red/ath:AT5G51060%09red
Cysteine and methionine metabolism	KEGG PATHWAY	ath00270	1	99	0.845743	0.952448	Gh_D13G2069	http://www.genome.jp/kegg-bin/show_pathway?ath00270/ath:AT5G56760%09red
Ribosome biogenesis in eukaryotes	KEGG PATHWAY	ath03008	1	101	0.851431	0.952448	Gh_A09G0411	http://www.genome.jp/kegg-bin/show_pathway?ath03008/ath:AT4G25630%09red
Phenylalanine metabolism	KEGG PATHWAY	ath00360	1	114	0.883639	0.956069	Gh_D10G1880	http://www.genome.jp/kegg-bin/show_pathway?ath00360/ath:AT5G05340%09red
mRNA surveillance pathway	KEGG PATHWAY	ath03015	1	114	0.883639	0.956069	Gh_D11G3258	http://www.genome.jp/kegg-bin/show_pathway?ath03015/ath:AT2G36660%09red
Phenylpropanoid biosynthesis	KEGG PATHWAY	ath00940	1	154	0.945243	0.984314	Gh_D10G1880	http://www.genome.jp/kegg-bin/show_pathway?ath00940/ath:AT5G05340%09red
RNA transport	KEGG PATHWAY	ath03013	1	169	0.958757	0.984314	Gh_D11G3258	http://www.genome.jp/kegg-bin/show_pathway?ath03013/ath:AT2G36660%09red
Plant hormone signal transduction	KEGG PATHWAY	ath04075	2	271	0.963515	0.984314	Gh_Sca006892G01|Gh_A10G0578	http://www.genome.jp/kegg-bin/show_pathway?ath04075/ath:AT5G47220%09red/ath:AT4G26080%09red
Starch and sucrose metabolism	KEGG PATHWAY	ath00500	1	188	0.971214	0.984314	Gh_D06G0902	http://www.genome.jp/kegg-bin/show_pathway?ath00500/ath:AT3G13790%09red
Protein processing in endoplasmic reticulum	KEGG PATHWAY	ath04141	1	220	0.984314	0.984314	Gh_D13G0686	http://www.genome.jp/kegg-bin/show_pathway?ath04141/ath:AT1G79650%09red

## Sheet: Hypo
#Term	Database	ID	Input number	Background number	P-Value	Corrected P-Value	Input	Hyperlink
Circadian rhythm - plant	KEGG PATHWAY	ath04712	4	36	0.0122707	0.773881	Gh_A11G2902|Gh_D11G1068|Gh_A11G2494|Gh_A12G1509	http://www.genome.jp/kegg-bin/show_pathway?ath04712/ath:AT5G62430%09red/ath:AT1G09530%09red/ath:AT1G01060%09red/ath:AT5G02810%09red
Carotenoid biosynthesis	KEGG PATHWAY	ath00906	3	29	0.0348793	0.773881	Gh_D12G2009|Gh_A09G0916|Gh_A09G1283	http://www.genome.jp/kegg-bin/show_pathway?ath00906/ath:AT4G19170%09red/ath:AT1G52340%09red/ath:AT3G10230%09red
Biosynthesis of secondary metabolites	KEGG PATHWAY	ath01110	32	995	0.0377108	0.773881	Gh_D11G0849|Gh_A07G2294|Gh_A04G1093|Gh_D02G2284|Gh_D13G1991|Gh_A09G1283|Gh_D03G0377|Gh_A07G1416|Gh_A07G1553|Gh_D12G2009|Gh_D07G1636|Gh_D05G1836|Gh_A12G1044|Gh_A09G0916|Gh_A05G3413|Gh_D12G2735|Gh_A03G1496|Gh_D02G1219|Gh_D04G0459|Gh_A12G0234|Gh_D03G0476|Gh_A07G0465|Gh_D04G0694|Gh_D02G1815|Gh_A03G1352|Gh_A04G0398|Gh_A03G1844|Gh_D13G1675|Gh_D12G1468|Gh_A01G1798|Gh_D10G0907|Gh_D09G1575	http://www.genome.jp/kegg-bin/show_pathway?ath01110/ath:AT1G74100%09red/ath:AT1G52340%09red/ath:AT3G26320%09red/ath:AT3G12500%09red/ath:AT4G26270%09red/ath:AT1G11680%09red/ath:AT5G42800%09red/ath:AT5G36160%09red/ath:AT2G20420%09red/ath:AT2G32520%09red/ath:AT1G01120%09red/ath:AT5G50370%09red/ath:AT4G33070%09red/ath:AT1G64970%09red/ath:AT4G23730%09red/ath:AT5G25140%09red/ath:AT5G17050%09red/ath:AT1…
Galactose metabolism	KEGG PATHWAY	ath00052	4	55	0.0439685	0.773881	Gh_D02G1219|Gh_A05G3413|Gh_D04G0459|Gh_A07G2294	http://www.genome.jp/kegg-bin/show_pathway?ath00052/ath:AT3G17940%09red/ath:AT4G26270%09red/ath:AT4G23920%09red/ath:AT5G15140%09red
Glycolysis / Gluconeogenesis	KEGG PATHWAY	ath00010	6	112	0.0509132	0.773881	Gh_D02G1219|Gh_D04G0459|Gh_A01G1798|Gh_A07G2294|Gh_D09G1575|Gh_D12G2735	http://www.genome.jp/kegg-bin/show_pathway?ath00010/ath:AT3G17940%09red/ath:AT4G26270%09red/ath:AT2G36580%09red/ath:AT4G33070%09red/ath:AT5G15140%09red/ath:AT4G23730%09red
Ribosome	KEGG PATHWAY	ath03010	13	360	0.0803738	0.915092	Gh_D13G1319|Gh_A13G2099|Gh_D09G1818|Gh_A08G1859|Gh_D11G1612|Gh_A10G1099|Gh_A01G2143|Gh_A05G3811|Gh_A10G1653|Gh_A13G1541|Gh_A10G0807|Gh_A09G0965|Gh_A01G2139	http://www.genome.jp/kegg-bin/show_pathway?ath03010/ath:AT3G49910%09red/ath:AT1G80750%09red/ath:AT4G25740%09red/ath:AT1G09690%09red/ath:AT3G09630%09red/ath:AT4G39200%09red/ath:AT3G61110%09red/ath:AT2G34480%09red/ath:AT5G61170%09red/ath:AT3G05590%09red/ath:ArthCp043%09red/ath:AT5G48760%09red
Tryptophan metabolism	KEGG PATHWAY	ath00380	3	45	0.0939083	0.915092	Gh_D02G1629|Gh_D08G0759|Gh_D03G0377	http://www.genome.jp/kegg-bin/show_pathway?ath00380/ath:AT1G48910%09red/ath:AT1G74100%09red/ath:AT1G70560%09red
Metabolic pathways	KEGG PATHWAY	ath01100	51	1861	0.108517	0.915092	Gh_D11G0849|Gh_D07G1240|Gh_A04G0761|Gh_A07G2294|Gh_D13G1675|Gh_A04G1093|Gh_A04G0428|Gh_D07G2317|Gh_A09G1283|Gh_A07G1416|Gh_A04G0034|Gh_A07G1553|Gh_D12G2009|Gh_D07G1636|Gh_A10G0789|Gh_D10G1605|Gh_D05G1836|Gh_Sca153506G01|Gh_A01G0418|Gh_A03G0725|Gh_D02G0069|Gh_A09G0916|Gh_A05G3413|Gh_D12G2735|Gh_A03G1496|Gh_D02G1219|Gh_Sca006756G05|Gh_D04G0459|Gh_Sca006756G06|Gh_D03G0476|Gh_Sca098321G01|Gh_D05G3816…	http://www.genome.jp/kegg-bin/show_pathway?ath01100/ath:AT1G13560%09red/ath:ArthMp100%09red/ath:AT1G52340%09red/ath:AT3G26320%09red/ath:ArthCp030%09red/ath:AT4G26270%09red/ath:AT1G11680%09red/ath:ArthCp014%09red/ath:AT4G02320%09red/ath:AT1G19910%09red/ath:AT2G20420%09red/ath:AT3G23920%09red/ath:AT2G32520%09red/ath:AT2G20360%09red/ath:AT3G21720%09red/ath:AT5G50370%09red/ath:AT3G06060%09red/ath:AT2…
Indole alkaloid biosynthesis	KEGG PATHWAY	ath00901	1	6	0.147836	0.915092	Gh_A12G0234	http://www.genome.jp/kegg-bin/show_pathway?ath00901/ath:AT2G23600%09red
Amino sugar and nucleotide sugar metabolism	KEGG PATHWAY	ath00520	5	122	0.159973	0.915092	Gh_D02G2284|Gh_D07G1636|Gh_D13G1991|Gh_A05G3413|Gh_A03G1844	http://www.genome.jp/kegg-bin/show_pathway?ath00520/ath:AT4G23920%09red/ath:AT4G19810%09red/ath:AT5G48300%09red/ath:AT3G12500%09red
Ubiquinone and other terpenoid-quinone biosynthesis	KEGG PATHWAY	ath00130	2	32	0.178637	0.915092	Gh_D13G1675|Gh_D02G1815	http://www.genome.jp/kegg-bin/show_pathway?ath00130/ath:AT1G64970%09red/ath:AT5G36160%09red
Brassinosteroid biosynthesis	KEGG PATHWAY	ath00905	1	8	0.185926	0.915092	Gh_D10G1401	http://www.genome.jp/kegg-bin/show_pathway?ath00905/ath:AT2G26710%09red
Steroid biosynthesis	KEGG PATHWAY	ath00100	2	34	0.195029	0.915092	Gh_A04G1093|Gh_A03G1352	http://www.genome.jp/kegg-bin/show_pathway?ath00100/ath:AT5G24160%09red/ath:AT1G11680%09red
Tyrosine metabolism	KEGG PATHWAY	ath00350	2	40	0.245091	0.915092	Gh_A12G0927|Gh_D02G1815	http://www.genome.jp/kegg-bin/show_pathway?ath00350/ath:AT2G02390%09red/ath:AT5G36160%09red
RNA degradation	KEGG PATHWAY	ath03018	4	111	0.261959	0.915092	Gh_A13G2306|Gh_D07G1596|Gh_A07G2294|Gh_D07G1489	http://www.genome.jp/kegg-bin/show_pathway?ath03018/ath:AT2G06990%09red/ath:AT4G26270%09red/ath:AT3G46960%09red/ath:AT1G08370%09red
Photosynthesis	KEGG PATHWAY	ath00195	3	77	0.270441	0.915092	Gh_A04G0428|Gh_Sca006756G05|Gh_A03G0725	http://www.genome.jp/kegg-bin/show_pathway?ath00195/ath:ArthCp021%09red/ath:AT1G79040%09red/ath:ArthCp010%09red
Vitamin B6 metabolism	KEGG PATHWAY	ath00750	1	13	0.273894	0.915092	Gh_D10G0665	http://www.genome.jp/kegg-bin/show_pathway?ath00750/ath:AT3G16050%09red
Oxidative phosphorylation	KEGG PATHWAY	ath00190	5	162	0.325853	0.915092	Gh_A10G0789|Gh_A01G0418|Gh_D04G1994|Gh_D13G2512|Gh_A03G0725	http://www.genome.jp/kegg-bin/show_pathway?ath00190/ath:AT1G19910%09red/ath:AT2G20360%09red/ath:ArthMp100%09red/ath:ArthCp026%09red/ath:ArthCp010%09red
Phagosome	KEGG PATHWAY	ath04145	3	86	0.326131	0.915092	Gh_D01G0380|Gh_D02G2420|Gh_D13G2512	http://www.genome.jp/kegg-bin/show_pathway?ath04145/ath:AT1G50010%09red/ath:AT1G19910%09red/ath:AT1G29310%09red
Other glycan degradation	KEGG PATHWAY	ath00511	1	18	0.352392	0.915092	Gh_A09G0006	http://www.genome.jp/kegg-bin/show_pathway?ath00511/ath:AT3G26720%09red
Pentose phosphate pathway	KEGG PATHWAY	ath00030	2	54	0.362012	0.915092	Gh_D11G0849|Gh_A07G2294	http://www.genome.jp/kegg-bin/show_pathway?ath00030/ath:AT4G26270%09red/ath:AT2G45290%09red
Glucosinolate biosynthesis	KEGG PATHWAY	ath00966	1	19	0.367047	0.915092	Gh_D03G0377	http://www.genome.jp/kegg-bin/show_pathway?ath00966/ath:AT1G74100%09red
Terpenoid backbone biosynthesis	KEGG PATHWAY	ath00900	2	58	0.394384	0.915092	Gh_A03G1496|Gh_D10G0907	http://www.genome.jp/kegg-bin/show_pathway?ath00900/ath:AT1G76490%09red/ath:AT4G36810%09red
Flavonoid biosynthesis	KEGG PATHWAY	ath00941	1	21	0.395373	0.915092	Gh_D05G1836	http://www.genome.jp/kegg-bin/show_pathway?ath00941/ath:AT5G42800%09red
Propanoate metabolism	KEGG PATHWAY	ath00640	1	22	0.409058	0.915092	Gh_A07G1416	http://www.genome.jp/kegg-bin/show_pathway?ath00640/ath:AT2G20420%09red
Photosynthesis - antenna proteins	KEGG PATHWAY	ath00196	1	22	0.409058	0.915092	Gh_D01G2232	http://www.genome.jp/kegg-bin/show_pathway?ath00196/ath:AT5G01530%09red
Isoquinoline alkaloid biosynthesis	KEGG PATHWAY	ath00950	1	23	0.422436	0.915092	Gh_D02G1815	http://www.genome.jp/kegg-bin/show_pathway?ath00950/ath:AT5G36160%09red
Sesquiterpenoid and triterpenoid biosynthesis	KEGG PATHWAY	ath00909	1	23	0.422436	0.915092	Gh_A04G1093	http://www.genome.jp/kegg-bin/show_pathway?ath00909/ath:AT5G24160%09red
Cutin, suberine and wax biosynthesis	KEGG PATHWAY	ath00073	1	23	0.422436	0.915092	Gh_D04G0694	http://www.genome.jp/kegg-bin/show_pathway?ath00073/ath:AT1G02205%09red
Glyoxylate and dicarboxylate metabolism	KEGG PATHWAY	ath00630	2	63	0.433763	0.915092	Gh_D02G1343|Gh_Sca006756G06	http://www.genome.jp/kegg-bin/show_pathway?ath00630/ath:AT3G21720%09red/ath:ArthCp030%09red
Limonene and pinene degradation	KEGG PATHWAY	ath00903	2	63	0.433763	0.915092	Gh_D12G1468|Gh_A04G0398	http://www.genome.jp/kegg-bin/show_pathway?ath00903/ath:AT3G26320%09red/ath:AT5G25140%09red
Stilbenoid, diarylheptanoid and gingerol biosynthesis	KEGG PATHWAY	ath00945	2	64	0.441475	0.915092	Gh_D12G1468|Gh_A04G0398	http://www.genome.jp/kegg-bin/show_pathway?ath00945/ath:AT3G26320%09red/ath:AT5G25140%09red
Lysine degradation	KEGG PATHWAY	ath00310	1	25	0.448292	0.915092	Gh_D03G0083	http://www.genome.jp/kegg-bin/show_pathway?ath00310/ath:AT4G35987%09red
Sphingolipid metabolism	KEGG PATHWAY	ath00600	1	26	0.460785	0.915092	Gh_D05G3816	http://www.genome.jp/kegg-bin/show_pathway?ath00600/ath:AT3G06060%09red
Ether lipid metabolism	KEGG PATHWAY	ath00565	1	26	0.460785	0.915092	Gh_A01G1256	http://www.genome.jp/kegg-bin/show_pathway?ath00565/ath:AT1G13560%09red
Carbon fixation in photosynthetic organisms	KEGG PATHWAY	ath00710	2	69	0.479145	0.915092	Gh_D11G0849|Gh_Sca006756G06	http://www.genome.jp/kegg-bin/show_pathway?ath00710/ath:AT2G45290%09red/ath:ArthCp030%09red
Carbon metabolism	KEGG PATHWAY	ath01200	6	243	0.494716	0.915092	Gh_A01G1798|Gh_Sca006756G06|Gh_D11G0849|Gh_A07G2294|Gh_A07G1416|Gh_D02G1343	http://www.genome.jp/kegg-bin/show_pathway?ath01200/ath:AT2G20420%09red/ath:ArthCp030%09red/ath:AT4G26270%09red/ath:AT2G36580%09red/ath:AT2G45290%09red/ath:AT3G21720%09red
Purine metabolism	KEGG PATHWAY	ath00230	4	157	0.495096	0.915092	Gh_A07G0465|Gh_Sca098321G01|Gh_A01G1798|Gh_D07G2317	http://www.genome.jp/kegg-bin/show_pathway?ath00230/ath:AT5G50370%09red/ath:AT3G27060%09red/ath:AT2G36580%09red/ath:ArthCp014%09red
Pyrimidine metabolism	KEGG PATHWAY	ath00240	3	116	0.506295	0.915092	Gh_Sca098321G01|Gh_D07G2317|Gh_A04G0034	http://www.genome.jp/kegg-bin/show_pathway?ath00240/ath:AT3G27060%09red/ath:ArthCp014%09red/ath:AT1G55810%09red
Fatty acid elongation	KEGG PATHWAY	ath00062	1	31	0.519147	0.915092	Gh_A12G1044	http://www.genome.jp/kegg-bin/show_pathway?ath00062/ath:AT1G01120%09red
Plant-pathogen interaction	KEGG PATHWAY	ath04626	4	164	0.528592	0.915092	Gh_A07G0398|Gh_A12G1044|Gh_A11G2426|Gh_D05G3719	http://www.genome.jp/kegg-bin/show_pathway?ath04626/ath:AT5G47910%09red/ath:AT4G26470%09red/ath:AT5G51060%09red/ath:AT1G01120%09red
alpha-Linolenic acid metabolism	KEGG PATHWAY	ath00592	1	33	0.54069	0.915092	Gh_D06G0087	http://www.genome.jp/kegg-bin/show_pathway?ath00592/ath:AT5G42650%09red
Pentose and glucuronate interconversions	KEGG PATHWAY	ath00040	2	81	0.562901	0.915092	Gh_D03G0971|Gh_D07G1240	http://www.genome.jp/kegg-bin/show_pathway?ath00040/ath:AT1G67750%09red/ath:AT4G02320%09red
Peroxisome	KEGG PATHWAY	ath04146	2	81	0.562901	0.915092	Gh_A13G0479|Gh_A13G1450	http://www.genome.jp/kegg-bin/show_pathway?ath04146/ath:AT1G08830%09red/ath:AT1G52870%09red
Tropane, piperidine and pyridine alkaloid biosynthesis	KEGG PATHWAY	ath00960	1	36	0.571215	0.915092	Gh_D02G1815	http://www.genome.jp/kegg-bin/show_pathway?ath00960/ath:AT5G36160%09red
Biosynthesis of unsaturated fatty acids	KEGG PATHWAY	ath01040	1	36	0.571215	0.915092	Gh_D10G2457	http://www.genome.jp/kegg-bin/show_pathway?ath01040/ath:AT3G11170%09red
Glycerophospholipid metabolism	KEGG PATHWAY	ath00564	2	83	0.575893	0.915092	Gh_A01G1256|Gh_A05G2088	http://www.genome.jp/kegg-bin/show_pathway?ath00564/ath:AT1G13560%09red/ath:AT1G71697%09red
Protein processing in endoplasmic reticulum	KEGG PATHWAY	ath04141	5	220	0.577953	0.915092	Gh_D01G0380|Gh_A05G0770|Gh_A11G1003|Gh_D07G1260|Gh_D01G2280	http://www.genome.jp/kegg-bin/show_pathway?ath04141/ath:AT2G47470%09red/ath:AT4G02570%09red/ath:AT2G29500%09red/ath:AT1G29310%09red/ath:AT3G62600%09red
Plant hormone signal transduction	KEGG PATHWAY	ath04075	6	271	0.599393	0.92409	Gh_A05G2244|Gh_A06G1664|Gh_D03G0445|Gh_D10G0643|Gh_D02G2237|Gh_A11G2494	http://www.genome.jp/kegg-bin/show_pathway?ath04075/ath:AT1G09530%09red/ath:AT4G39400%09red/ath:AT2G21050%09red/ath:AT3G16500%09red/ath:AT4G24210%09red/ath:AT4G29080%09red
beta-Alanine metabolism	KEGG PATHWAY	ath00410	1	40	0.608796	0.92409	Gh_A12G2582	http://www.genome.jp/kegg-bin/show_pathway?ath00410/ath:AT2G43020%09red
Base excision repair	KEGG PATHWAY	ath03410	1	43	0.634812	0.92409	Gh_D03G0135	http://www.genome.jp/kegg-bin/show_pathway?ath03410/ath:AT1G19480%09red
N-Glycan biosynthesis	KEGG PATHWAY	ath00510	1	44	0.643095	0.92409	Gh_Sca153506G01	http://www.genome.jp/kegg-bin/show_pathway?ath00510/ath:AT2G39630%09red
RNA polymerase	KEGG PATHWAY	ath03020	1	45	0.651191	0.92409	Gh_Sca098321G01	http://www.genome.jp/kegg-bin/show_pathway?ath03020/ath:ArthCp014%09red
Cysteine and methionine metabolism	KEGG PATHWAY	ath00270	2	99	0.669659	0.92409	Gh_D02G1815|Gh_A05G3224	http://www.genome.jp/kegg-bin/show_pathway?ath00270/ath:AT5G49160%09red/ath:AT5G36160%09red
Alanine, aspartate and glutamate metabolism	KEGG PATHWAY	ath00250	1	48	0.674399	0.92409	Gh_D02G0069	http://www.genome.jp/kegg-bin/show_pathway?ath00250/ath:AT3G08860%09red
Fructose and mannose metabolism	KEGG PATHWAY	ath00051	1	52	0.702967	0.92409	Gh_A07G2294	http://www.genome.jp/kegg-bin/show_pathway?ath00051/ath:AT4G26270%09red
Glycerolipid metabolism	KEGG PATHWAY	ath00561	1	52	0.702967	0.92409	Gh_A04G0761	http://www.genome.jp/kegg-bin/show_pathway?ath00561/ath:AT5G01220%09red
Protein export	KEGG PATHWAY	ath03060	1	53	0.70971	0.92409	Gh_D01G0380	http://www.genome.jp/kegg-bin/show_pathway?ath03060/ath:AT1G29310%09red
Phenylalanine, tyrosine and tryptophan biosynthesis	KEGG PATHWAY	ath00400	1	57	0.735192	0.92409	Gh_D02G1815	http://www.genome.jp/kegg-bin/show_pathway?ath00400/ath:AT5G36160%09red
Proteasome	KEGG PATHWAY	ath03050	1	58	0.741206	0.92409	Gh_A01G0931	http://www.genome.jp/kegg-bin/show_pathway?ath03050/ath:AT5G42790%09red
mRNA surveillance pathway	KEGG PATHWAY	ath03015	2	114	0.741704	0.92409	Gh_A09G1580|Gh_A08G0612	http://www.genome.jp/kegg-bin/show_pathway?ath03015/ath:AT5G25510%09red/ath:AT1G18070%09red
Citrate cycle (TCA cycle)	KEGG PATHWAY	ath00020	1	62	0.763934	0.935752	Gh_A07G1416	http://www.genome.jp/kegg-bin/show_pathway?ath00020/ath:AT2G20420%09red
Glycine, serine and threonine metabolism	KEGG PATHWAY	ath00260	1	69	0.799027	0.935752	Gh_D02G0069	http://www.genome.jp/kegg-bin/show_pathway?ath00260/ath:AT3G08860%09red
Starch and sucrose metabolism	KEGG PATHWAY	ath00500	3	188	0.810309	0.935752	Gh_D07G1240|Gh_D10G1605|Gh_D07G1636	http://www.genome.jp/kegg-bin/show_pathway?ath00500/ath:AT3G23920%09red/ath:AT5G48300%09red/ath:AT4G02320%09red
Fatty acid metabolism	KEGG PATHWAY	ath01212	1	73	0.816694	0.935752	Gh_D10G2457	http://www.genome.jp/kegg-bin/show_pathway?ath01212/ath:AT3G11170%09red
2-Oxocarboxylic acid metabolism	KEGG PATHWAY	ath01210	1	74	0.820864	0.935752	Gh_D03G0377	http://www.genome.jp/kegg-bin/show_pathway?ath01210/ath:AT1G74100%09red
Arginine and proline metabolism	KEGG PATHWAY	ath00330	1	75	0.824939	0.935752	Gh_A12G2582	http://www.genome.jp/kegg-bin/show_pathway?ath00330/ath:AT2G43020%09red
Biosynthesis of amino acids	KEGG PATHWAY	ath01230	4	255	0.841393	0.94038	Gh_D11G0849|Gh_A01G1798|Gh_A07G2294|Gh_D02G1815	http://www.genome.jp/kegg-bin/show_pathway?ath01230/ath:AT4G26270%09red/ath:AT2G36580%09red/ath:AT5G36160%09red/ath:AT2G45290%09red
Pyruvate metabolism	KEGG PATHWAY	ath00620	1	83	0.854385	0.941062	Gh_A01G1798	http://www.genome.jp/kegg-bin/show_pathway?ath00620/ath:AT2G36580%09red
Glutathione metabolism	KEGG PATHWAY	ath00480	1	93	0.884352	0.958767	Gh_D07G2317	http://www.genome.jp/kegg-bin/show_pathway?ath00480/ath:AT3G27060%09red
Ribosome biogenesis in eukaryotes	KEGG PATHWAY	ath03008	1	101	0.903836	0.958767	Gh_A12G1604	http://www.genome.jp/kegg-bin/show_pathway?ath03008/ath:AT4G04940%09red
Phenylalanine metabolism	KEGG PATHWAY	ath00360	1	114	0.928767	0.958767	Gh_D02G1815	http://www.genome.jp/kegg-bin/show_pathway?ath00360/ath:AT5G36160%09red
Aminoacyl-tRNA biosynthesis	KEGG PATHWAY	ath00970	1	115	0.930393	0.958767	Gh_A08G1995	http://www.genome.jp/kegg-bin/show_pathway?ath00970/ath:AT3G02760%09red
Endocytosis	KEGG PATHWAY	ath04144	1	117	0.933537	0.958767	Gh_A09G1177	http://www.genome.jp/kegg-bin/show_pathway?ath04144/ath:AT3G12160%09red
Ubiquitin mediated proteolysis	KEGG PATHWAY	ath04120	1	149	0.968306	0.981217	Gh_D01G2280	http://www.genome.jp/kegg-bin/show_pathway?ath04120/ath:AT4G02570%09red
Spliceosome	KEGG PATHWAY	ath03040	1	192	0.988325	0.988325	Gh_A03G1230	http://www.genome.jp/kegg-bin/show_pathway?ath03040/ath:AT1G60170%09red
