# Supplementary material for: Integrated Methylome and Transcriptome Analysis between the CMS-D2 Line ZBA and Its Maintainer Line ZB in Upland Cotton
Source: Int J Mol Sci. 2019 Dec 2;20(23):6070. doi: 10.3390/ijms20236070 (PMC6928835; doi:10.3390/ijms20236070)
Supplement: Supplementary file 1 [file ijms-20-06070-s001.zip › Table S4. Information on 13 DMEGs in the oxidative phosphorylation signaling pathway involved in anther development.xlsx]

## Sheet: Oxidative phosphorylation
Table S4. Information on 13 DMEGs in the oxidative phosphorylation signaling pathway involved in anther development
Mitochondrial ETC	Gene ID	Gene Location	DMR	DMR Chromosome	DMR Start	DMR End	DMR Length	mC Sites	ZB MethyLevel	ZBA MethyLevel	ZB Depth	ZBA Depth	p-Value	MethyLevel Ratio	MethyLevel Difference	Hyer or Hypo in ZB	Homologous Arabidopsis Gene ID	Arabidopsis Description	SwissProt Description
Complex I	Gh_A01G0418	A01:6642748-6645214	promoter	A01	6641128	6642115	988	52	0.0371991	0.156676	8.78846	14.1154	1.12584e-11	0.237427	-0.119477	Hypo	AT2G20360	NAD(P)-binding Rossmann-fold superfamily protein	NADH dehydrogenase [ubiquinone] 1 alpha subcomplex subunit 9
	Gh_A03G0734	A03:30450653-30450974	exon,promoter	A03	30450368	30452161	1794	484	0.18527	0.0457041	14.4194	54.564	2.2378e-278	4.05369	0.139566	Hyper	ATCG01010	NADH-Ubiquinone oxidoreductase (complex I), chain 5 protein	NAD(P)H-quinone oxidoreductase subunit 5
	Gh_A10G0789	A10:16073942-16075103	exon,intron	A10	16073441	16074940	1500	494	0.0229781	0.214115	129.502	15.2308	0	0.107317	-0.191137	Hypo	ATCG00430	photosystem II reaction center protein G	NAD(P)H-quinone oxidoreductase subunit K
	Gh_D04G0898	D04:25620278-25622521	exon,intron,promoter	D04	25619954	25623252	3299	979	0.219437	0.0441342	14.3044	71.8396	0	4.97205	0.175303	Hyper	ATCG01100	NADH dehydrogenase family protein	NAD(P)H-quinone oxidoreductase subunit 1
	Gh_D11G3194	D11:64800084-64802168	exon,intron	D11	64798296	64800192	1897	419	0.167222	0.00378879	9.31981	682.833	0	44.1358	0.163433	Hyper	ATCG01100	NADH dehydrogenase family protein	NAD(P)H-quinone oxidoreductase subunit 1
	Gh_Sca005646G04	scaffold5646:8683-9199	exon	scaffold5646	9014	10009	996	119	0.21301	0.0211851	13.1765	109.479	2.80719e-169	10.0547	0.191825	Hyper	ATCG00420	NADH dehydrogenase subunit J	NAD(P)H-quinone oxidoreductase subunit J
	Gh_Sca006566G05	scaffold6566:9319-9787	promoter	scaffold6566	1926	8199	6274	1450	0.187753	0.0199305	19.9676	162.634	0	9.42039	0.167822	Hyper	ATMG00510	NADH dehydrogenase subunit 7	NADH dehydrogenase [ubiquinone] iron-sulfur protein 2
Complex V	Gh_A03G0725	A03:30384041-30384509	promoter	A03	30381190	30382830	1641	279	0.284053	0.0903197	8.63082	23.7706	4.7197e-108	3.14498	0.193733	Hyper	ATCG00150	ATPase, F0 complex, subunit A protein	ATP synthase subunit a
	Gh_A05G0978	A05:9741036-9747246	promoter	A05	9748560	9748844	285	39	0.216763	0.0861467	8.87179	22.0256	3.20637e-09	2.51621	0.130616	Hyper	AT1G78900	vacuolar ATP synthase subunit A	V-type proton ATPase catalytic subunit A
	Gh_D04G1994	scaffold3975_D04:23761-24850	promoter	scaffold3975_D04	25299	26508	1210	336	0.177539	0.0112031	18.0208	212.527	0	15.8474	0.166336	Hyper	ATMG01190	ATP synthase subunit 1	ATP synthase subunit alpha
	Gh_D13G2512	scaffold4697_D13:549862-551935	exon,intron	scaffold4697_D13	551585	552575	991	95	0.0619748	0.181818	10.0211	10.0737	4.85272e-16	0.340861	-0.119843	Hypo	AT1G19910	ATPase, F0/V0 complex, subunit C protein	V-type proton ATPase 16 kDa proteolipid subunit
	Gh_Sca010487G02	scaffold10487:1636-3133	promoter	scaffold10487	3538	4382	845	104	0.216545	0.0984252	7.90385	14.6538	2.06512e-14	2.2001	0.11812	Hyper	ATCG00480	ATP synthase subunit beta	ATP synthase subunit beta
	Gh_Sca010487G03	scaffold10487:3214-4306	exon,promoter	scaffold10487	3538	4382	845	104	0.216545	0.0984252	7.90385	14.6538	2.06512e-14	2.2001	0.11812	Hyper	ATCG00480	ATP synthase subunit beta	ATP synthase subunit beta
ETC: electron transport chain; Hyper: Hypermethylated; Hypo: Hypomethylated. MethyLevel Ratio and MethyLevel Difference refer to the ratio and difference of the average methylation level of ZB and ZBA in a certain DMR region, respectively.
