# Supplementary material for: Integrated Methylome and Transcriptome Analysis between the CMS-D2 Line ZBA and Its Maintainer Line ZB in Upland Cotton
Source: Int J Mol Sci. 2019 Dec 2;20(23):6070. doi: 10.3390/ijms20236070 (PMC6928835; doi:10.3390/ijms20236070)
Supplement: Supplementary file 1 [file ijms-20-06070-s001.zip › Table S5. Primers used for qRT-PCR in this study.xlsx]

## Sheet: Primers
Table S5. Primers used for qRT-PCR in this study
Primer name	Primer sequence(5'-3')	Destination
Gh_A01G0418/GhNDUA9-qRT-F	AGTGCCAATGAAATACGACCC	qRT-PCR
Gh_A01G0418/GhNDUA9-qRT-R	AGATAGACCAGCCGTTTGATT	qRT-PCR
Gh_A03G0734/GhNU5C-qRT-F	TAGGTTTTTGGTTCACACGAC	qRT-PCR
Gh_A03G0734/GhNU5C-qRT-R	CAACTGCGCCGGTAAATAATA	qRT-PCR
Gh_A10G0789/GhNDHK-qRT-F	TAGAACCAATGGGCGATGCTT	qRT-PCR
Gh_A10G0789/GhNDHK-qRT-R	TGCTCCTTTTCGCCATGCATA	qRT-PCR
Gh_D04G0898/GhNU1C-qRT-F	CTAGCAGATGGAACAAAACTA	qRT-PCR
Gh_D04G0898/GhNU1C-qRT-R	ATCCTGACATAAGAAGTCCAA	qRT-PCR
Gh_D11G3194/GhNU1C-qRT-F	ACGTATTGGGCCTGAATATGC	qRT-PCR
Gh_D11G3194/GhNU1C-qRT-R	CCTGACATAAGAAGTCCAACG	qRT-PCR
Gh_Sca005646G04/GhNDHJ-qRT-F	ACAAATAAAAAAGAAAAGTGT	qRT-PCR
Gh_Sca005646G04/GhNDHJ-qRT-R	ACATCATAGGCACATTGGGAA	qRT-PCR
Gh_Sca006566G05/GhNDUS2-qRT-F	TGCCAATTTCATACGACCAGG	qRT-PCR
Gh_Sca006566G05/GhNDUS2-qRT-R	TACACCACTGAATCCCCAATC	qRT-PCR
Gh_A03G0725/GhATPI-qRT-F	ATATCAAATGCACTAAACGGG	qRT-PCR
Gh_A03G0725/GhATPI-qRT-R	TTGCTTACGTCTCGAATGAAT	qRT-PCR
Gh_A05G0978/GhVATA-qRT-F	TTTACGGAGCCAGATTGACGA	qRT-PCR
Gh_A05G0978/GhVATA-qRT-R	CGTAAACTTGGATTGTAGCAG	qRT-PCR
Gh_D04G1994/GhATPAM-qRT-F	TATCAAACTCATGGCAGTCCT	qRT-PCR
Gh_D04G1994/GhATPAM-qRT-R	CTCCAGGGGGATCCATCCTAA	qRT-PCR
Gh_D13G2512/GhVATL-qRT-F	GTACTGGCATCAATCCAAAGG	qRT-PCR
Gh_D13G2512/GhVATL-qRT-R	GCTTCAGCAAAGATGAGGATC	qRT-PCR
Gh_Sca010487G02/GhATPB-qRT-F	CTACTACTTCTGTTCCTGGAG	qRT-PCR
Gh_Sca010487G02/GhATPB-qRT-R	ATCACTTCCATTCCTCTCGTT	qRT-PCR
Gh_Sca010487G03/GhATPB-qRT-F	AATTTTTAACGTGCTTGGGGA	qRT-PCR
Gh_Sca010487G03/GhATPB-qRT-R	CTGTTTTACCTACCCCAGCCT	qRT-PCR
GhHIS3-qRT-F	CGGTGGTGTGAAGAAGCCTCAT	qRT-PCR
GhHIS3-qRT-R	AATTTCACGAACAAGCCTCTGGAA	qRT-PCR
